# Supplementary material for: Structures and reaction dynamics of N2 and H2 binding at FeMo-co, the active site of nitrogenase
Source: Royal Society of Chemistry journal article supplement (doi:10.1039/d1dt03548g), 2021-01-01
Supplement: d1dt03548g1.pdf [file d1dt03548g1.pdf]

## Structures and reaction dynamics of N<sub>2</sub> and H<sub>2</sub> binding at FeMo-co, the active site of nitrogenase.

Ian Dance

School of Chemistry

UNSW Sydney

Sydney

Australia

i.dance@unsw.edu.au

### Supplementary Information

S1. Calculation of transition states

S2. Density functional procedures and validation

S3. Additional descriptions and analyses of the binding of H<sub>2</sub>

S3.1. H<sub>2</sub> at endo positions

S3.2. H<sub>2</sub> at exo positions

S4. Additional descriptions and analyses of the binding of N<sub>2</sub>

S4.1. Exo end-on-N<sub>2</sub>, structures 9-11, 17, 25-27

S4.2. Endo end-on-N<sub>2</sub>, structures 22-24

S4.3. Endo side-on-N<sub>2</sub>, structures 18-21

S5. Dissociation trajectory beyond the transition state for endo side-on N<sub>2</sub> of structure **18**.

S6. Entropy data

S7. Plasticity of FeMo-co and His195 involvement

S8. Additional mechanisms for H<sub>2</sub> / N<sub>2</sub> exchange.

S9. Coordinates and spin densities for bound structures

## S1. Calculation of transition states

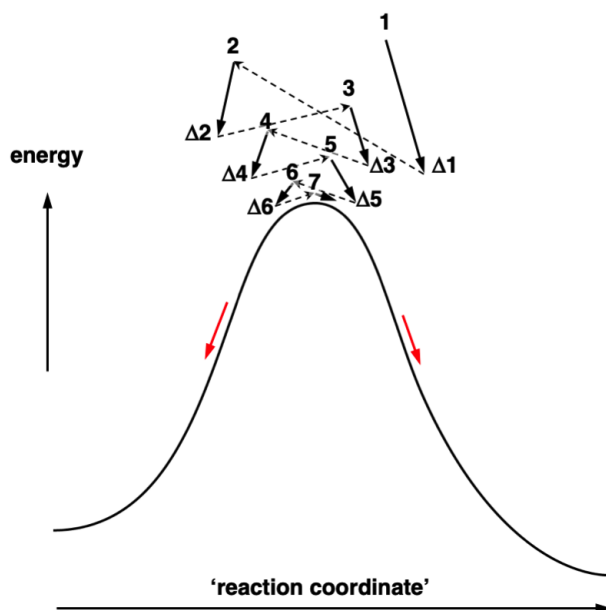

Fig. S1 Generalised diagram of the procedure for locating a reaction transition state. The solid arrows represent the course of limited small-step energy reductions from the numbered positions, which are generated (broken arrows) from D positions partway along the previous energy reduction, chosen according to geometry and energy gradient. The postulated trials necessarily oscillate across the barrier, and therefore optimise all other variables and decrease the energy and gradient while approaching the top of the barrier. Confirmation that the transition state, reactant and product are on the same potential energy surface is obtained by complete energy minimisations (red arrows).

## S2. Density functional procedures and validation

Density functional (DF) calculations use the DMol methodology of Delley,<sup>1-5</sup> with accurate DNP (double numerical plus polarisation) basis sets.<sup>4</sup> The real-space cutoff in the calculation of atomic basis sets was 9 au (4.76Å), which gives results within 0.1% of the limit for larger extensions of the basis sets. The gradient-corrected functional PBE<sup>6</sup> was used because validation tests demonstrate that it is more accurate than other commonly used functionals when used with DMol.<sup>7</sup> The calculations were all-electron, spin-unrestricted, with no imposed symmetry. The conductor-like screening model (COSMO)<sup>8-10</sup> was used with a dielectric constant of 5. Constraints on interatomic distances used the Lagrange Multiplier Algorithm. Spin populations are calculated by the Mulliken method.<sup>11</sup>

The DMol method uses numerical solutions of DFT-free atoms as part of its basis set, and thus gives highly accurate DFT solutions for the separated atoms limit.<sup>4</sup> These numerical basis sets avoid the need for basis set superposition corrections, and provide reliable energies at long intermolecular distances. This advantage of the DMol methodology obviates the need for empirical treatment<sup>12</sup> of the long-range dispersion energies that are involved when the computational model is comprised of separate molecular units. This ability of the DMol methodology to incorporate long-range dispersion has been well demonstrated. Zhang *et al* reported the excellent agreement between the experimental interatomic potential energy curves and the DMol/PBE calculated potential energy

curves for the inert-gas pairs He<sub>2</sub>, Ne<sub>2</sub>, Ar<sub>2</sub>, HeNe, HeAr and NeAr.<sup>13</sup> Todorova and Delley used DMol to optimize the crystal structures of a comprehensive set over 40 molecular crystals in which dispersion and intermolecular interactions determine the crystal packing and crystal lattice parameters.<sup>14</sup> This set of molecular crystals ranged over amino acids, aliphatic and aromatic hydrocarbons, ice, H<sub>2</sub>S, S<sub>8</sub>, C<sub>60</sub>, and the inert gases Ne, Ar, Kr and Xe. The PBE functional overestimates lattice parameters by about 4%, while the PBE<sub>sol</sub> functional yields lattice parameters with an average systematic error of less than 1%. Todorova and Delley emphasise that the DMol numerical basis sets have low BSSE because of the accurate tails of the molecular orbitals.

The PBE/DMol method reproduces experimental enthalpy data on the binding of N<sub>2</sub>. Relevant  $\Delta H_{\text{exp}} / \Delta H_{\text{calc}}$  comparisons from ref <sup>7</sup> are (kcal mol<sup>-1</sup>) (a) exp 17.6, calc 20.0, 18.8 (b) exp ~10, calc 10.2 (c) exp 22.8, calc 25.9. Other assessments of DMol accuracy vs experiment have examined the electron affinities of atoms and molecules,<sup>15</sup> the enthalpies of formation for small (<100 electrons) molecular and atomic species,<sup>16</sup> the structures of metal-sulfide clusters,<sup>17</sup> photo-induced conversion of [Os(NH<sub>3</sub>)<sub>5</sub>( $\eta^1$ -N<sub>2</sub>)<sup>2+</sup> to [Os(NH<sub>3</sub>)<sub>5</sub>( $\eta^2$ -N<sub>2</sub>)<sup>2+</sup> (i.e. end-on to side-on bonding of N<sub>2</sub>),<sup>18</sup> the geometry and vibrational frequencies of [(NH<sub>3</sub>)<sub>5</sub>Ru(pyrazine)Ru(NH<sub>3</sub>)<sub>5</sub>]<sup>4+,5+,6+</sup>,<sup>19</sup> and protonation reactions involving hydrogen bonding.<sup>20</sup>

### S3. Additional descriptions and analyses of the binding of H<sub>2</sub>

Refer to Table 1.

#### S3.1. H<sub>2</sub> at endo positions

Endo H<sub>2</sub> is bound in transverse configuration when the exo ligand on Fe is H, but is closer to parallel conformation when the exo ligand is endo-on N<sub>2</sub>, or absent; variations in the configuration of Fe-H<sub>2</sub> involve very small energy changes, as expected. The endo angle is large, 159-174°, in all structures except **1** and **2** where the exo Fe2 position contiguous to Fe2-H<sub>2</sub> is void and the endo angle is slightly smaller (149, 144°). For reference, the endo angles in unligated FeMo-co are 118 (Fe2), 116 (Fe6)°. In **1** and **2** the Fe2-C<sup>c</sup> bond is contracted slightly to 1.95Å, compared with 2.12-2.24 in the others, but at Fe6 with endo H<sub>2</sub> (structure **8**) Fe6-C<sup>c</sup> is elongated to 2.36Å. In **5** the HisN $\epsilon$ -H bond is directed between S2B and the *exo*-H atom on Fe2, such that there is a weak (1.72Å) HisN $\epsilon$ -H••H-Fe2 dihydrogen bond and a bent (142°) HisN $\epsilon$ -H→S2B hydrogen bond.

The adaptation energies, which range between 7 and 24 kcal mol<sup>-1</sup>, correlate generally with the endo angles in the dissociated limit, and therefore with the difference in endo angle between associated and dissociated structures. The larger adaptation energies, 18-24 kcal mol<sup>-1</sup>, occur in **1**, **2**, **3**, **5**, **6**, **8**, and **10-H<sub>2</sub>** which have smaller (112 - 128) endo angles at the dissociated limit and in the optimized-sans-H<sub>2</sub> structure. This correlation of the dissociated endo angle with the adaptation energy continues for **4**, 135° and 16 kcal mol<sup>-1</sup>; for **7**, 138° and 12 kcal mol<sup>-1</sup>; for **9-H<sub>2</sub>**, 152° and 9 kcal mol<sup>-1</sup>; and for **11-H<sub>2</sub>**, 162° and 7 kcal mol<sup>-1</sup>. Interactions involving His195 influence the adaptation energies. The short strong HisN $\epsilon$ -H••H-Fe2 dihydrogen bond in **4** is associated with a smaller adaptation energy, 16 kcal mol<sup>-1</sup>, than that of **3**, 22 kcal mol<sup>-1</sup>, with a HisN $\epsilon$ -H→S2B hydrogen bond and the same ligated FeMo-co structure. The smaller adaptation energies and larger endo angles in dissociated **7** and **11-H<sub>2</sub>** are related to the absence of any hydrogen bonding between His195 and S2B. Structure **9-H<sub>2</sub>** does have a hydrogen bond from His195 to S2B, but the endo angle in both the dissociated state (152) and opt-sans-H<sub>2</sub> (155°) is unusually large: this appears to

be a consequence of the course of the dissociation trajectory on the PES of the transition state, because there is another deeper potential energy well for the opt-sans-H<sub>2</sub> form of **9-H<sub>2</sub>**.

The association and dissociation trajectories of **11-H<sub>2</sub>** are anomalous. H<sub>2</sub> introduced ca 2.9 Å from Fe2, and with no van der Waals interference, resides on a very flat energy surface. There is a small ridge, < 1 kcal mol<sup>-1</sup> with Fe2-H distances of 2.4, 2.6 Å, beyond which H<sub>2</sub> binds to Fe2, with enlargement of the endo angle to 173°. The barrier for the reverse dissociation is 6 kcal mol<sup>-1</sup>. Structure **7**, also without hydrogen bonding between His195 and FeMo-co, similarly has a flat energy surface with small barriers for association (4 kcal mol<sup>-1</sup>) and dissociation (10 kcal mol<sup>-1</sup>).

### S3.2. H<sub>2</sub> at exo positions

H<sub>2</sub> is not strongly bound in an exo-Fe position, as the barriers to dissociation are small, 3 - 8 kcal mol<sup>-1</sup>. The adaptation energies in **13 -16** range from 11 to 26 kcal mol<sup>-1</sup>, and correlate with the difference in Fe-C<sup>c</sup> distance between the bound and dissociated structures, regarded as the main source of the adaptation energy. Similarly, the barriers to H<sub>2</sub> binding, ranging 7 - 20 kcal mol<sup>-1</sup>, follow the adaptation energies. H<sub>2</sub> dissociated from Fe2 is located in the hydrophobic channel adjacent to Arg277, Ser278) while H<sub>2</sub> dissociated from Fe6 encounters the sidechain of Gln191 and its hydrogen bond with O1 of homocitrate.

## S4. Additional descriptions and analyses of the binding of N<sub>2</sub>

Refer to Table 2.

### S4.1. Exo end-on-N<sub>2</sub>, structures 9-11, 17, 25-27

In all structures the Fe-N distances are 1.81-1.83 Å, and the trans Fe-C<sup>c</sup> bond ranges 2.16 - 2.23 Å, except in **17** and **26** where a Fe2-H-Fe6 bridge enforces shorter Fe-C<sup>c</sup> distances (2.10, 2.07 Å). The stability of this end-on bonding of N<sub>2</sub> is shown by the barriers to dissociation which are 13 - 16 kcal mol<sup>-1</sup> in all structures except **25** (7 kcal mol<sup>-1</sup>) and **26** (10 kcal mol<sup>-1</sup>). Adaptation energies are ca 18 kcal mol<sup>-1</sup>, except in **26** where movement of the symmetrical Fe2-H-Fe6 bridge in the bound structure to asymmetric endo-Fe6-H in the dissociated structure increases the adaptation energy to 26 kcal mol<sup>-1</sup>.

The one structure with N<sub>2</sub> bound at exo-Fe6, **27**, is unusual, because the H atom bound to Fe2 is folded backwards towards the sidechain of Phe381. The C<sup>c</sup>-Fe2-H angle is 135°. In the optimized-sans-N<sub>2</sub> form of **27** this angle is even more acute, 115°, and H on Fe2 is in van der Waals contact with Phe381. This unusual geometry arises because S2BH is folded far forward, such that the endo angles are 91° at Fe2 and 96° at Fe6, and H on Fe2 folds back to symmetrise the fivefold coordination of Fe2. N<sub>2</sub> on Fe6 is also tilted slightly backwards. See section S7.

Unbound N<sub>2</sub> approaching exo Fe2 is located within the N<sub>2</sub> pathway (Fig 2), adjacent to the sidechains of Arg277, Ser278 and Val70. Passage of N<sub>2</sub> towards binding at the exo-Fe2 site is easy. The calculated trajectory involves ca 3 kcal mol<sup>-1</sup> of diffusion as N<sub>2</sub> slides from 3.8 Å to about 3.3 Å from Fe2, the dissociated limit (see **10-N<sub>2</sub>**, **11-N<sub>2</sub>**, **17-N<sub>2</sub>**, **25**, **26**). The barrier from this point to the transition state ranges from very small (2 kcal mol<sup>-1</sup>) in structures **17** and **11** to 7 kcal mol<sup>-1</sup> in structure **26** (which also has the largest adaptation energy, contributing to the barrier for association). These potential energy barriers for the formation of end-on bound N<sub>2</sub> at exo-Fe2 are

remarkably small. At Fe6, when N<sub>2</sub> dissociates from the exo position it encounters the sidechains of Gln191 and Val70.

#### S4.2. Endo end-on-N<sub>2</sub>, structures 22-24

Structures **22** and **23** have end-on N<sub>2</sub> bound at endo-Fe2, with endo angles 172, 168° and Fe2-C<sup>c</sup> 2.19Å. The adaptation energies are 19, 20 kcal mol<sup>-1</sup>. At endo-Fe6, structure **24**, N<sub>2</sub> bound end-on does not extend Fe6-C<sup>c</sup> (2.17Å) as does endo side-on N<sub>2</sub> at Fe6 (Fe6-C<sup>c</sup> = 2.74Å in **21**). However, the adaptation energy for **24** is larger, 31 kcal mol<sup>-1</sup>, which is attributable to changes in the dihydrogen bond between the bound and dissociated states of **24**, causing a larger change in the endo angle.

#### S4.3. Endo side-on-N<sub>2</sub>, structures 18-21

Three structures, **18**, **19**, **20**, have N<sub>2</sub> bound side-on at endo-Fe2, and one **21** at endo-Fe6. The geometry at Fe2 is normal, with endo angles 170-175 and Fe2-C<sup>c</sup> = 2.20, but at endo Fe6 side-on N<sub>2</sub> causes large distortion of the coordination geometry, including extension of Fe6-C<sup>c</sup> to 2.74Å. This distortion in **21** requires an unusually large adaptation energy of 36 kcal mol<sup>-1</sup>. For the three structures binding N<sub>2</sub> at endo Fe2 the adaptation energies are significantly smaller, 25, 27 and 22 kcal mol<sup>-1</sup>. Barriers to dissociation of endo side-on N<sub>2</sub>, a measure of stability, range 3 to 8 kcal mol<sup>-1</sup>.

The transition states for **18**, **19** and **20** and the trajectories from TS to the bound state are well defined. Beyond the TS the trajectories involve two stages, first the separation of N<sub>2</sub> and recovery of the adapted geometry of FeMo-co, and second the diffusion of the N<sub>2</sub> far from Fe2. The two stages are evident in the trajectory for **18**, described below. Structure **20** shows similar behaviour, with ca 11 kcal mol<sup>-1</sup> for the recovery of FeMo-co geometry (assessed as decrease in the Fe2 endo angle) and ca 6 kcal mol<sup>-1</sup> improvement as N<sub>2</sub> diffuses to ca 5Å from Fe2. For structure **19**, in both S=1 and S=0 spin states, the decrease in the Fe2 endo angle and diffusion of N<sub>2</sub> occur together as N<sub>2</sub> reaches 5Å from Fe2. The total downhill energy is ca 25 kcal mol<sup>-1</sup>, similar to the total energy change for **18** and **20**, and the diffusion pathways are the same. Variations in the endo-Fe angle decreases during the dissociation trajectories of **18**, **19** and **20** are attributable to the different interactions involving His195 (short strong dihydrogen bond in **18**, weaker dihydrogen bond in **19**, nothing in **20**), because these interactions are involved in the flapping of S2B inherent in endo angle variations.

#### S5. Dissociation trajectory beyond the transition state for endo side-on N<sub>2</sub> of structure **18**.

Fig. S2 plots the endo-Fe2 angle with the energy improvement as N<sub>2</sub> separates from the transition state with Fe- N<sub>2</sub> = 2.5Å, to almost 5Å from Fe2. The decrease of the endo angle from 175 to 140° is complete when the Fe- N<sub>2</sub> separation is about 3.5Å. Then there is further energy reduction of at least 10 kcal mol<sup>-1</sup> as N<sub>2</sub> diffuses to 5Å away. The path of this diffusion of N<sub>2</sub> passes by residues Val70, Val71, His195 and Ser278, without any adverse van der Waals contacts. Fig S2 also illustrates a general property of dissociation trajectories from endo positions, which is that the endo angle undergoes small variations as the remainder of FeMo-co and connected protein adjust.

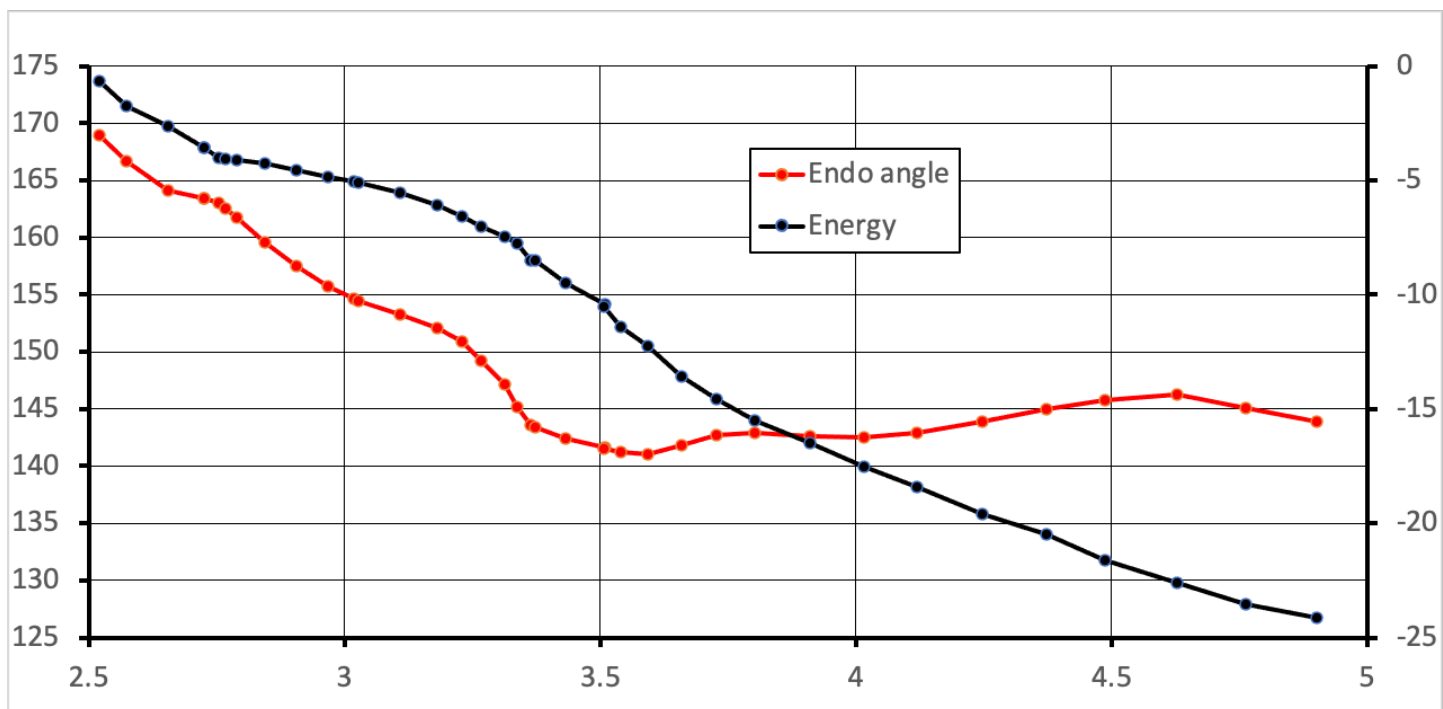

Fig. S2. The trajectory for dissociation of side-on  $N_2$  from  $Fe_2$  in structure **18**. The TS with mean Fe-N distance  $2.5\text{\AA}$  is on the left. Energy minimisation causes  $N_2$  to move to about  $5\text{\AA}$  from Fe. Reduction in the endo angle at  $Fe_2$  is complete when the Fe-N separation is about  $3.5\text{\AA}$ : The further wobble in endo angle between  $141$  and  $146^\circ$  is due to adjustments in other parts of  $FeMo-co$  and linked protein. The dihydrogen bond is short,  $1.25 - 1.37\text{\AA}$ , throughout this trajectory.

## S6. Entropy data

There is no experimental or computational information on the entropy changes associated with the the binding of  $H_2$  or  $N_2$  to  $FeMo-co$  within the  $MoFe$  protein. There is experimental entropy data for the binding of  $H_2$  and  $N_2$  to metal sites that have chemical similarities with the  $Fe$  sites of  $FeMo-co$ . These data are for the ligand,  $H_2$  or  $N_2$ , in the gas phase, and the complex in non-aqueous solution. For the binding of  $H_2$  or  $N_2$  to  $FeMo-co$ , the relevant dissociated state for the small molecule ligand is not gas phase but condensed phase, considered to be a diffusible position within the protein. Here the ligand will have lost translational and rotational entropy relative to the gas phase.

The cobalt binding site shown in Figure S3 has analogous four-coordinate geometry, similar soft ligands in the trigonal positions, and the axial B ligand approximates  $C^c$  of  $FeMo-co$ .

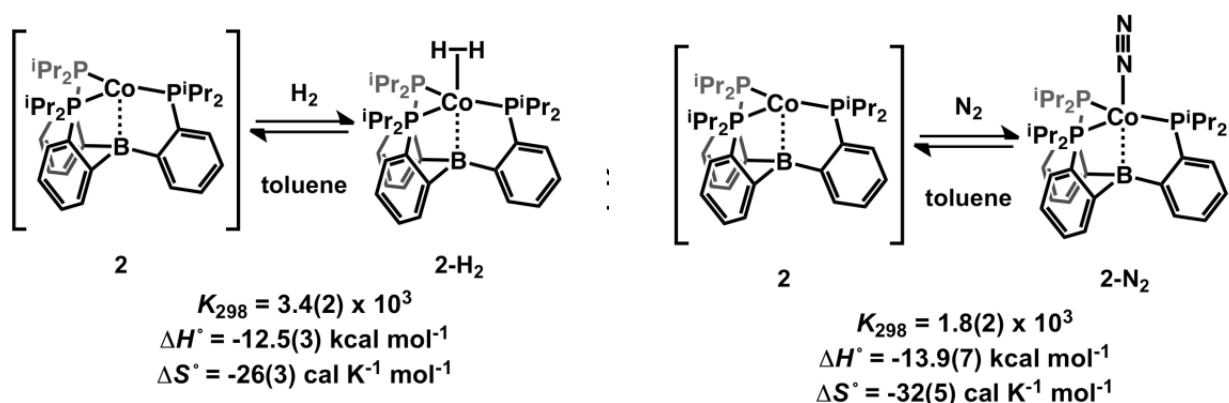

Fig. S3. Enthalpy and entropy data from ref <sup>21</sup>

Gonzalez and Hoff<sup>22</sup> measured enthalpy and entropy changes for the binding of H<sub>2</sub> and N<sub>2</sub> to [P(C<sub>6</sub>H<sub>11</sub>)<sub>3</sub>]<sub>2</sub>M(CO)<sub>3</sub> (M = Cr, Mo, W in THF. Relevant results are tabulated.

[P(C<sub>6</sub>H<sub>11</sub>)<sub>3</sub>]<sub>2</sub>M(CO)<sub>3</sub> + L(g) → [P(C<sub>6</sub>H<sub>11</sub>)<sub>3</sub>]<sub>2</sub>M(CO)<sub>3</sub>L (in THF solution)

| M  | L              | ΔS cal mol <sup>-1</sup> K <sup>-1</sup> |
|----|----------------|------------------------------------------|
| Cr | N <sub>2</sub> | -35.4 ± 2.3                              |
| Cr | H <sub>2</sub> | -25.6 ± 1.7                              |
| Mo | N <sub>2</sub> | -32.1 ± 3.2                              |
| Mo | H <sub>2</sub> | -23.8 ± 2.1                              |

Additional reports are cited in ref <sup>21</sup>.

### S7. Plasticity of FeMo-co and His195 involvement

When a dihydrogen bonded structure (right) changes to a linear HisNε-H ••• S2B structure (**27**) with Fe2-H folded backwards from the exo position, there are concomitant changes in the some dimentions of FeMo-co, as shown in Fig S4.

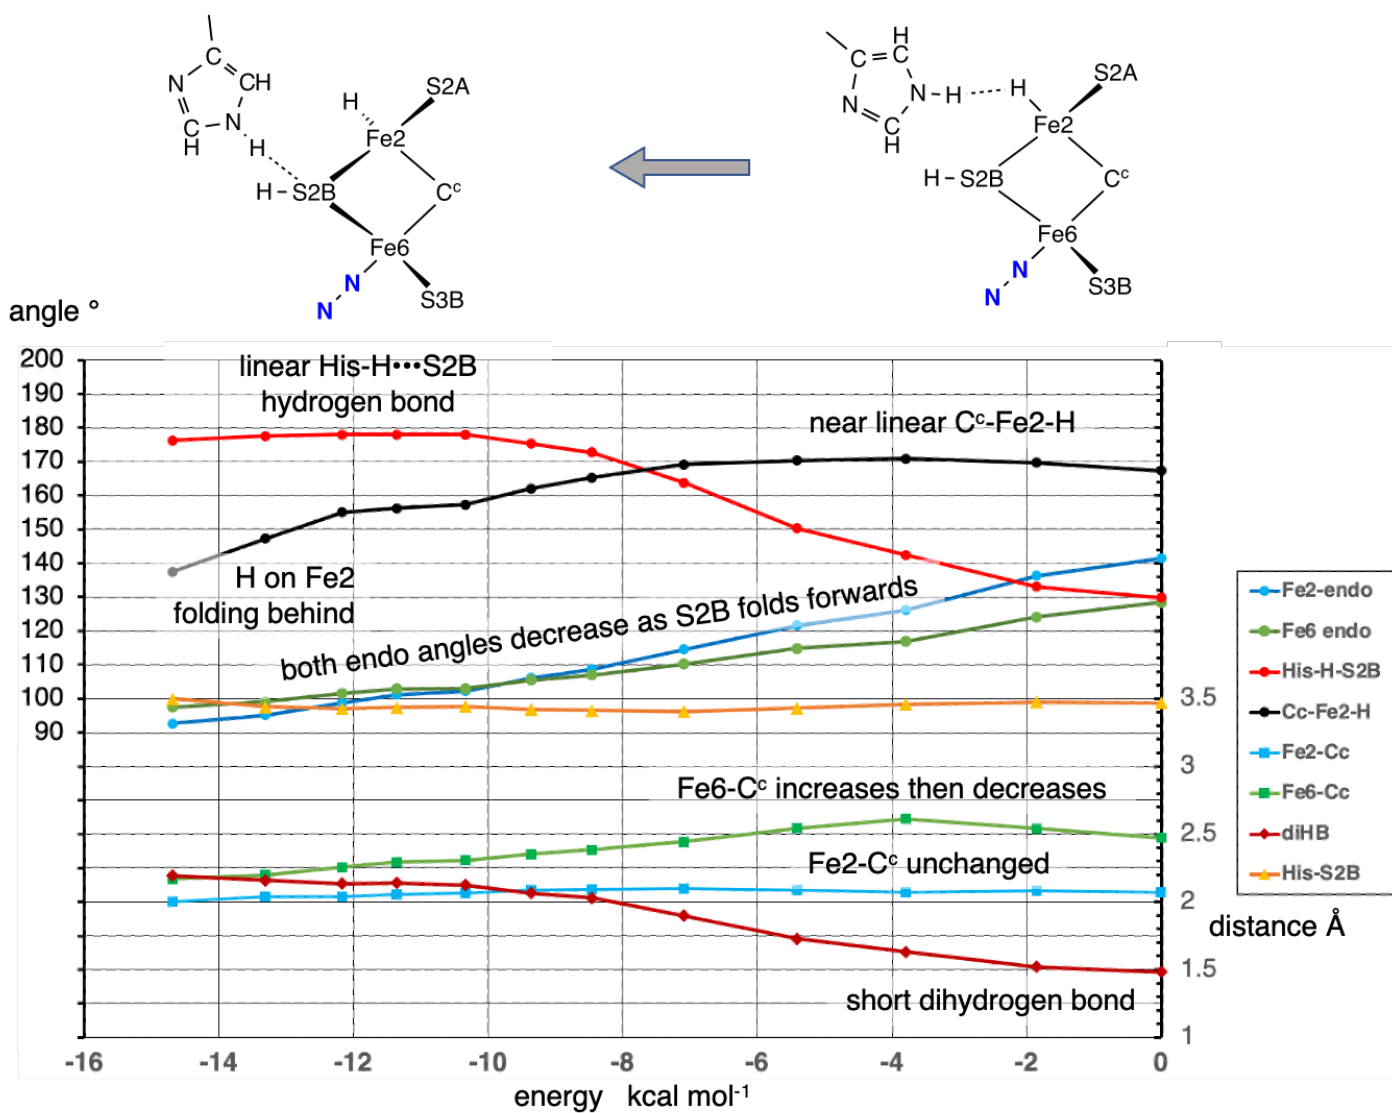

Fig. S4. Energyscape for concerted changes involving hydrogen bonding from His195 and the geometry of ligated FeMo-co.



## S8. Additional mechanisms for H<sub>2</sub> / N<sub>2</sub> exchange.

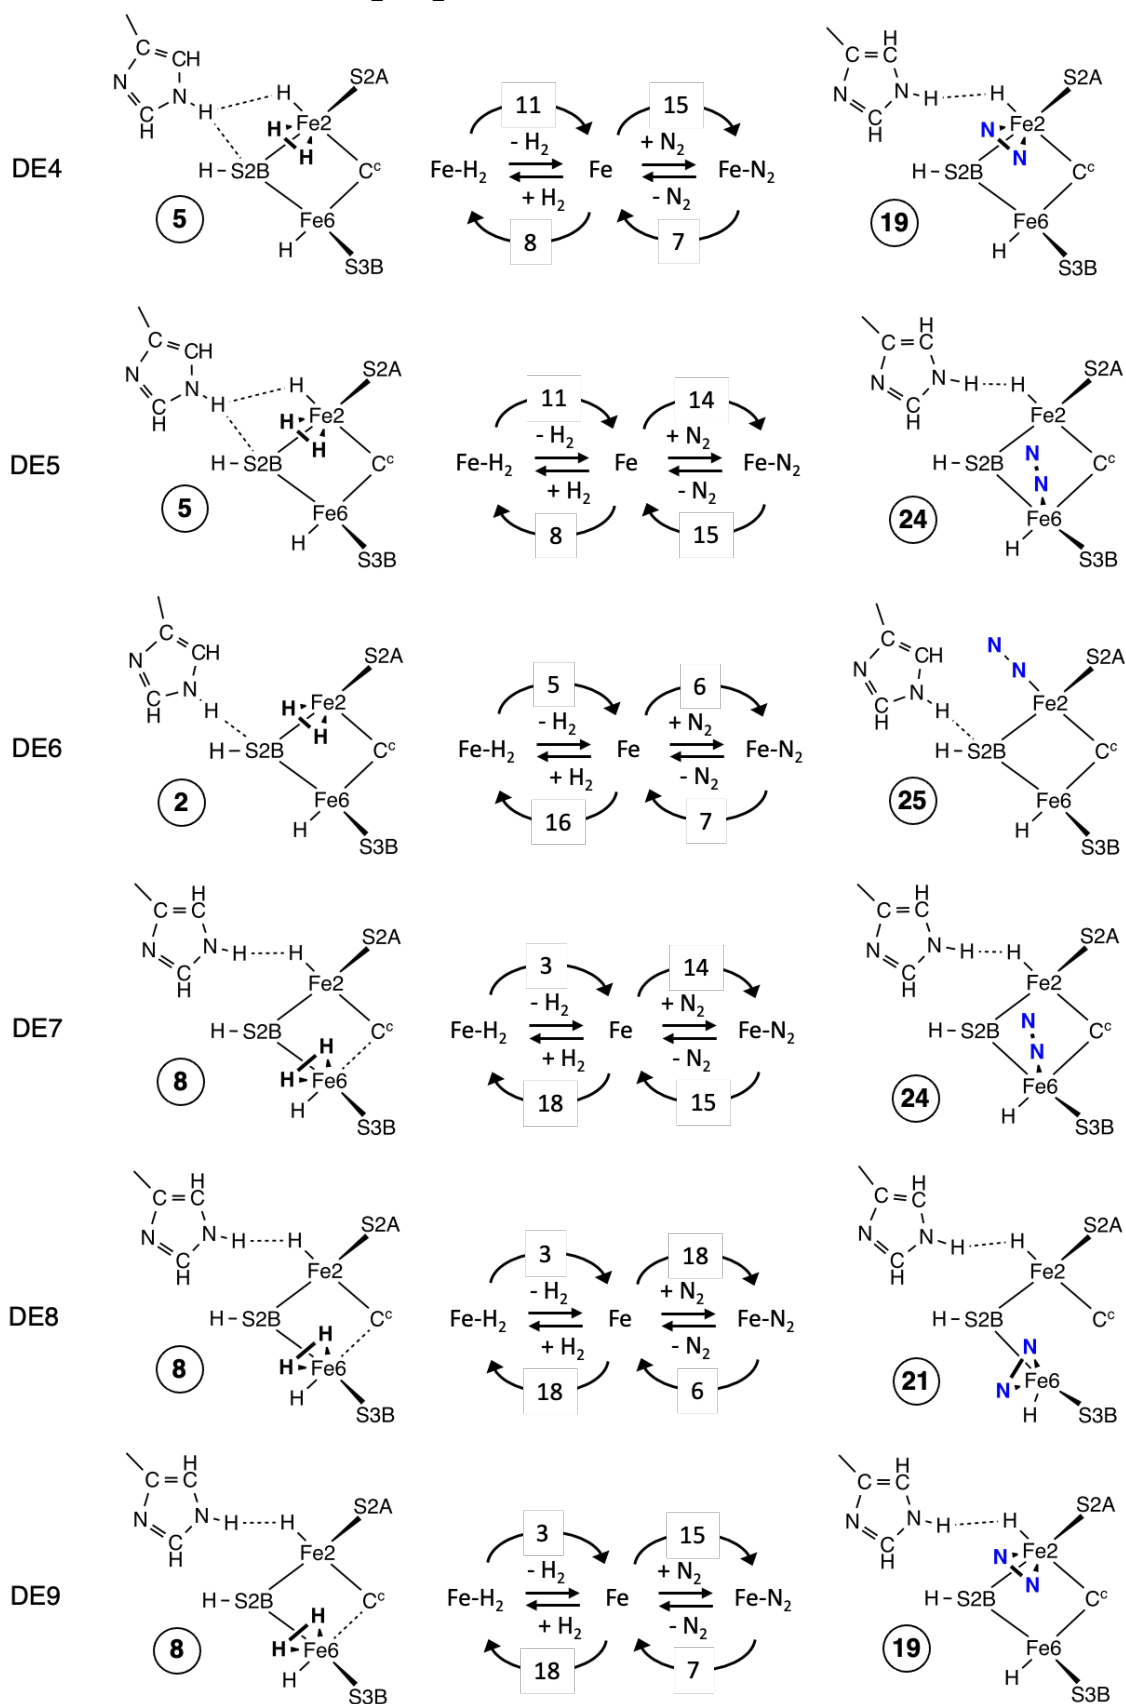

Fig S5. Additional mechanisms for dissociative exchange of H<sub>2</sub> and N<sub>2</sub>, with potential energy barriers (kcal mol<sup>-1</sup>, marked on the arrows) for the steps involved. These have some large reaction barriers and are less feasible than those described in Scheme 6.

## References

- 1 B. Delley, *J. Chem. Phys.*, 1990, **92**, 508-517.
- 2 B. Delley, in *Modern density functional theory: a tool for chemistry*, eds. J. M. Seminario and P. Politzer, Elsevier, Amsterdam, 1995, p. 221-254
- 3 J. Baker, A. Kessi and B. Delley, *The Journal of Chemical Physics*, 1996, **105**, 192-212. doi:<http://dx.doi.org/10.1063/1.471864>
- 4 B. Delley, *J. Chem. Phys.*, 2000, **113**, 7756-7764.
- 5 J. Andzelm, R. D. King-Smith and G. Fitzgerald, *Chemical Physics Letters*, 2001, **335**, 321-326. [http://dx.doi.org/10.1016/S0009-2614\(01\)00030-6](http://dx.doi.org/10.1016/S0009-2614(01)00030-6)
- 6 J. P. Perdew, K. Burke and M. Ernzerhof, *Phys. Rev. Lett.*, 1996, **77**, 3865-3868.
- 7 I. Dance, *Molecular Simulation*, 2018, **44**, 568-581. doi.org/10.1080/08927022.2017.1413711
- 8 J. Andzelm, C. Kolmel and A. Klamt, *J. Chem. Phys.*, 1995, **103**, 9312-9320.
- 9 A. Klamt, V. Jonas, T. Burger and J. C. W. Lohrenz, *J. Phys. Chem. A*, 1998, **102**, 5074-5085.
- 10 B. Delley, *Molecular Simulation*, 2006, **32**, 117-123.
- 11 R. S. Mulliken, *J. Chem. Phys.*, 1955, **23**, 1833-1846.
- 12 S. Grimme, *J. Comput. Chem.*, 2006, **27**, 1787-1799.
- 13 Y. Zhang, W. Pan and W. Yang, *J. Chem. Phys.*, 1997, **107**, 7921-7925.
- 14 T. Todorova and B. Delley, *The Journal of Physical Chemistry C*, 2010, **114**, 20523-20530. 10.1021/jp1049759
- 15 M. Meunier, N. Quirke and D. Binesti, *Molec. Simulation*, 1999, **23**, 109-125.
- 16 B. Delley, *The Journal of Physical Chemistry A*, 2006, **110**, 13632-13639. 10.1021/jp0653611
- 17 I. Dance, *J. Chem. Soc., Chem. Commun.*, 1998, 523-530.
- 18 D. Schaniel, T. Wolke, B. Delley, C. Boskovic and H. U. Gudel, *Phys. Chem. Chem. Phys.*, 2008, **10**, 5531-5538. 10.1039/b806933f
- 19 T. Todorova and B. Delley, *Inorganic Chemistry*, 2008, **47**, 11269-11277. 10.1021/ic8018748
- 20 I. Dance, *Journal of Inorganic Biochemistry*, 2017, **169**, 32-43. 10.1016/j.jinorgbio.2017.01.005
- 21 D. L. M. Suess, C. Tsay and J. C. Peters, *Journal of the American Chemical Society*, 2012, **134**, 14158-14164. 10.1021/ja305248f
- 22 A. A. Gonzalez and C. D. Hoff, *Inorganic Chemistry*, 1989, **28**, 4295-4297. 10.1021/ic00322a023

## S9. Coordinates and spin densities for bound structures

Translation of Fe numbering

Fe1 = Fe143

Fe2 = Fe140

Fe3 = Fe141

Fe4 = Fe142

Fe5 = Fe139

Fe6 = Fe145

Fe7 = Fe144

| structure, spin densities | filename, coordinates              |               |                           |
|---------------------------|------------------------------------|---------------|---------------------------|
| <b>1 (S=1/2)</b>          | <b>bm22b6x2h2nconexbdtmi.car_2</b> |               |                           |
| Fe(139) 1.915             | C1                                 | -1.945094869  | 1.101572138 -9.457452011  |
| Fe(140) -0.493            | C2                                 | -2.452749408  | 2.113158990 -8.425366185  |
| Fe(141) 2.706             | C3                                 | -2.671431539  | 4.489244947 -7.831234344  |
| Fe(142) -2.709            | C4                                 | -4.143615237  | 4.525428964 -7.423187057  |
| Fe(143) 3.178             | C5                                 | -6.472878366  | 4.169100391 -8.068497659  |
| Fe(144) -2.502            | C6                                 | -6.880433356  | 3.059142021 -7.092754476  |
| Fe(145) -1.583            | C7                                 | -6.376916141  | 0.817613726 -6.245124771  |
|                           | C8                                 | -5.831805773  | 1.150253324 -4.854264769  |
|                           | C9                                 | -4.089522731  | 2.223086698 -3.538753819  |
|                           | C10                                | -4.972005121  | 3.237838494 -2.796195299  |
|                           | C11                                | -6.347962920  | 5.231604370 -2.902923428  |
|                           | C12                                | -7.712056818  | 4.689838384 -2.453196057  |
|                           | C13                                | -9.737092394  | 3.479496593 -3.101310946  |
|                           | C14                                | -9.924841003  | 2.218857379 -2.246805044  |
|                           | C15                                | -9.115061769  | -0.045269077 -1.738966566 |
|                           | C16                                | -8.119306049  | -0.361804812 -0.622495822 |
|                           | C17                                | -5.996095579  | 0.246314710 0.468441728   |
|                           | C18                                | -6.034025079  | 1.229289933 1.651043006   |
|                           | C19                                | -4.601856147  | 0.186635354 -0.219867196  |
|                           | C20                                | -3.442170345  | 0.159374451 0.782231699   |
|                           | C21                                | -4.524967403  | -1.009105414 -1.174362533 |
|                           | C22                                | -6.185468170  | 3.616554544 2.321666696   |
|                           | C23                                | -7.664647159  | 3.950694170 2.605524239   |
|                           | C24                                | -5.354476911  | 4.856793669 1.916705783   |
|                           | C25                                | -5.585289018  | 6.017545214 2.892478662   |
|                           | C26                                | -3.863447596  | 4.509523011 1.832738699   |
|                           | C27                                | -9.840633761  | 4.626354902 1.766445830   |
|                           | C28                                | -10.585438511 | 3.533281247 2.508308105   |
|                           | C29                                | -9.067774689  | -9.597353728 -1.968802027 |
|                           | C30                                | -7.977026689  | -9.438354369 -0.909993218 |
|                           | C31                                | -7.261860372  | -7.986887155 0.996709798  |
|                           | C32                                | -7.993751661  | -8.189792231 2.336917804  |
|                           | C33                                | -6.828281106  | -6.523018741 0.797364773  |
|                           | C34                                | -5.883888081  | -5.996953734 1.881828641  |
|                           | C35                                | -5.242897432  | -4.680955113 1.440489081  |
|                           | C36                                | -4.311039513  | -2.932214553 2.974908295  |
|                           | C37                                | -7.841541074  | -9.153825035 4.584982210  |
|                           | C38                                | -7.141705402  | -8.416487095 5.704831241  |
|                           | C39                                | 0.742204561   | 1.498241715 -5.659804110  |
|                           | C40                                | 1.136030879   | 2.753692096 -4.869382890  |
|                           | C41                                | 0.624169567   | 0.343315335 -4.636203351  |
|                           | C42                                | -0.072887186  | -0.941848096 -5.126187662 |
|                           | C43                                | 0.841037916   | -1.967518464 -5.792642078 |
|                           | C44                                | 2.998466762   | 4.222340381 -4.270260536  |
|                           | C45                                | 2.540361713   | 5.633660029 -4.668335856  |
|                           | C46                                | 4.536182172   | 4.143553030 -4.229955034  |
|                           | C47                                | 1.022744592   | 6.955124931 -6.078704484  |
|                           | C48                                | -0.330694524  | 7.090145780 -5.362255488  |
|                           | C49                                | -1.986151837  | 5.995724510 -3.902593221  |
|                           | C50                                | -1.794429731  | 6.107938621 -2.385552140  |
|                           | C51                                | -0.356400684  | 5.850291523 -0.426424920  |
|                           | C52                                | -0.385448912  | 7.341537979 -0.016778274  |
|                           | C53                                | 1.035475753   | 5.355502619 0.003617825   |
|                           | C54                                | 1.307457324   | 3.888242423 -0.073893030  |
|                           | C55                                | 0.514870037   | 2.773764586 0.072043738   |
|                           | C56                                | 2.606758382   | 2.078172137 -0.181411292  |

|      |              |               |              |
|------|--------------|---------------|--------------|
| C57  | 0.510066440  | 9.561617019   | -0.611098686 |
| C58  | -0.778975630 | 10.304435587  | -0.261596197 |
| C59  | 1.172430164  | 10.184988254  | -1.860251605 |
| C60  | 1.981591392  | 11.427142835  | -1.626484455 |
| C61  | 1.846943438  | 12.427679271  | -0.684371554 |
| C62  | 3.581445554  | 12.832616154  | -2.003155042 |
| C63  | -3.681894187 | -3.244236321  | 8.309725261  |
| C64  | -4.210255485 | -4.665693801  | 8.367296267  |
| C65  | -3.746057117 | -2.800744101  | 6.826469031  |
| C66  | -3.308890660 | -1.368980060  | 6.624679822  |
| C67  | -4.222779342 | -0.303059802  | 6.719167255  |
| C68  | -1.967584083 | -1.062376527  | 6.335513092  |
| C69  | -3.817116919 | 1.020922706   | 6.519652947  |
| C70  | -1.545630219 | 0.254016148   | 6.142984519  |
| C71  | -2.475067207 | 1.293618434   | 6.229172655  |
| C72  | 3.407637785  | 0.758721881   | 8.217835627  |
| C73  | 4.287946432  | 1.987744546   | 7.950011432  |
| C74  | 2.705094093  | 0.317505115   | 6.924489715  |
| C75  | 6.589470021  | 2.820550208   | 7.677981747  |
| C76  | 6.695369758  | 3.289517360   | 6.225773269  |
| C77  | 6.051231654  | 2.885281542   | 3.876953855  |
| C78  | 4.738788520  | 3.622451787   | 3.527997690  |
| C79  | 6.278983633  | 1.637353631   | 3.000297097  |
| C80  | 6.304186538  | 1.849588102   | 1.482836846  |
| C81  | 7.487858506  | 2.645292971   | 0.909524490  |
| C82  | 8.054144807  | 5.050520494   | 1.255984452  |
| C83  | 2.331024494  | 3.811514427   | 3.797254805  |
| C84  | 2.073595716  | 5.086801148   | 4.619640441  |
| C85  | 1.114890932  | 2.885033512   | 3.973962827  |
| C86  | 2.102413719  | 6.019365124   | 6.881980806  |
| C87  | 2.974016482  | 7.181454019   | 7.342294259  |
| C88  | 5.066644749  | 8.439767221   | 7.080741056  |
| C89  | 4.696250040  | 9.866930812   | 6.624825145  |
| C90  | 6.510578591  | 8.081599252   | 6.677232356  |
| C91  | 6.708216418  | 8.058642625   | 5.164670510  |
| C92  | 3.479520276  | 11.223685727  | 4.986334437  |
| C93  | 2.875756447  | 12.210601870  | 5.975945131  |
| C94  | 2.493842751  | 10.997823355  | 3.807594593  |
| C95  | 3.085173207  | 10.081089208  | 2.761600276  |
| C96  | 3.959313410  | 10.586118887  | 1.786176597  |
| C97  | 2.848320918  | 8.696564519   | 2.788382433  |
| C98  | 4.594045184  | 9.738870843   | 0.875007377  |
| C99  | 3.499788248  | 7.830175779   | 1.904437014  |
| C100 | 4.374401393  | 8.362876067   | 0.961023923  |
| C101 | 6.482102565  | -8.555275399  | -1.188133074 |
| C102 | 6.243342086  | -7.302589573  | -2.014686378 |
| C103 | 5.647823037  | -4.899754409  | -1.936010612 |
| C104 | 6.654443179  | -3.800534649  | -1.582811174 |
| C105 | 7.478674177  | -2.334087263  | 0.195413155  |
| C106 | 7.908157222  | -2.399153718  | 1.657648171  |
| C107 | 7.721317364  | -3.457023869  | 3.859362991  |
| C108 | 8.664282643  | -4.595011222  | 4.190701053  |
| C109 | 7.265522813  | -3.979132571  | -6.113817074 |
| C110 | 7.434667813  | -2.457733472  | -6.209298968 |
| C111 | 5.763890712  | -4.318254488  | -5.951381056 |
| C112 | 5.484336213  | -5.799404328  | -6.262849408 |
| C113 | 4.096444807  | -6.204275279  | -5.809447867 |
| C114 | 7.639589321  | -0.329247980  | -5.019341379 |
| C115 | 8.678025535  | 0.106039402   | -4.002816037 |
| C116 | 6.289459463  | 0.424882726   | -4.933121456 |
| C117 | 5.401308091  | -0.137477049  | -3.855919199 |
| C118 | 5.587120213  | 0.217251495   | -2.508806896 |
| C119 | 4.457448310  | -1.131912243  | -4.167725936 |
| C120 | 4.892019999  | -0.455741295  | -1.501244241 |
| C121 | 3.762358362  | -1.802815701  | -3.158349552 |
| C122 | 4.001292213  | -1.484963904  | -1.819074781 |
| C123 | 0.783525715  | -11.060293506 | 1.090256698  |
| C124 | -0.295303356 | -11.496256632 | 2.095509849  |
| C125 | 0.194058008  | -10.256048273 | -0.079570550 |
| C126 | 1.188808280  | -9.644628695  | -1.018649922 |
| C127 | 2.058592751  | -10.302964921 | -1.865289067 |
| C128 | 2.178082434  | -8.123004699  | -2.235432955 |
| C129 | -2.488551327 | -12.458707253 | 2.519124321  |
| C130 | -1.969690152 | -13.441742625 | 3.544922910  |
| C131 | -2.735367066 | -4.941652190  | -3.926590048 |
| C132 | -2.990649651 | -5.656838168  | -2.631833570 |
| C133 | -2.032942052 | -6.898455769  | -2.399231855 |
| C134 | -2.235088400 | -7.938343919  | -3.537234183 |
| C135 | -1.479638698 | -9.249515927  | -3.269265502 |
| C136 | -1.838484409 | -10.365014905 | -4.208859638 |

|       |               |               |               |
|-------|---------------|---------------|---------------|
| C137  | -2.517886912  | -7.571633066  | -1.078001527  |
| C138  | 1.498035418   | -3.754755142  | 1.806141518   |
| Fe139 | 2.336742393   | -5.272092809  | 0.928285918   |
| Fe140 | 1.068481558   | -1.854675586  | 1.599493005   |
| Fe141 | 1.054192209   | -3.322837041  | 3.686484326   |
| Fe142 | 3.357525356   | -3.497398526  | 2.452288979   |
| Fe143 | 2.960644509   | -1.391205340  | 3.969197093   |
| Fe144 | 0.035636755   | -5.089121728  | 2.033786625   |
| Fe145 | 0.618366969   | -3.695568772  | -0.253737086  |
| H146  | -2.685433135  | -0.554015277  | -8.518802995  |
| H147  | -1.071287390  | -0.362447109  | -8.328409462  |
| H148  | -1.808536697  | 3.667275403   | -9.607204642  |
| H149  | -0.973959269  | 1.439570632   | -9.851684523  |
| H150  | -2.644922848  | 1.145748289   | -10.311034079 |
| H151  | -2.095461959  | 4.400889156   | -6.899529023  |
| H152  | -4.724773295  | 3.940011478   | -9.304816112  |
| H153  | -2.415765975  | 5.448882987   | -8.300679181  |
| H154  | -7.025323886  | 4.033748646   | -9.007549254  |
| H155  | -5.367727281  | 1.871121872   | -7.801857847  |
| H156  | -6.782001138  | 5.120497058   | -7.616301469  |
| H157  | -3.957148766  | 1.363511292   | -2.870394968  |
| H158  | -4.107926689  | 1.952520240   | -5.672876483  |
| H159  | -5.876438425  | -0.082378774  | -6.627485171  |
| H160  | -5.854411840  | 5.635990981   | -2.010024954  |
| H161  | -5.255207510  | 4.335850624   | -4.531622877  |
| H162  | -7.444106700  | 0.594245285   | -6.128629881  |
| H163  | -3.098869690  | 2.663329870   | -3.721747163  |
| H164  | -7.969926555  | 3.744663719   | -4.276160018  |
| H165  | -6.511165490  | 6.053471253   | -3.613617759  |
| H166  | -5.334391002  | -0.993630027  | -1.917159581  |
| H167  | -3.566178223  | -1.003109709  | -1.715662060  |
| H168  | -4.579174096  | -1.960079162  | -0.621464504  |
| H169  | -4.510002786  | 1.116065792   | -0.802152064  |
| H170  | -10.214249516 | 3.294696392   | -4.074632697  |
| H171  | -3.670267710  | 3.706924175   | 1.106757266   |
| H172  | -8.077936294  | 4.379083061   | 0.595785886   |
| H173  | -6.636990053  | 6.338905182   | 2.914119468   |
| H174  | -2.486962981  | 0.171875116   | 0.234904365   |
| H175  | -3.446437270  | -0.749648991  | 1.399662385   |
| H176  | -4.384507381  | -2.607734292  | 8.881764438   |
| H177  | -3.289097802  | 5.395049884   | 1.523647222   |
| H178  | -4.973835956  | 6.881954446   | 2.593935137   |
| H179  | -3.484029458  | 4.184313979   | 2.814889793   |
| H180  | -5.293418299  | 5.730764121   | 3.915717610   |
| H181  | -5.691875937  | 5.178960422   | 0.914020497   |
| H182  | -5.803723521  | 3.216729679   | 3.271612354   |
| H183  | -5.966924449  | 2.814972491   | 0.346255957   |
| H184  | -3.447439368  | 1.027928670   | 1.457349772   |
| H185  | 1.323973533   | 1.906540684   | 3.504452994   |
| H186  | 0.271329821   | 3.357548483   | 3.447146378   |
| H187  | -0.155580285  | 2.752090910   | 5.476841964   |
| H188  | -2.736955213  | 3.217037078   | 6.098929429   |
| H189  | -0.507275335  | 0.463729146   | 5.882726219   |
| H190  | -1.239823516  | -1.868954291  | 6.212745882   |
| H191  | -5.274828373  | -0.507596307  | 6.932445753   |
| H192  | -6.950217845  | 1.228403440   | -1.179847821  |
| H193  | -9.022896696  | -0.852324511  | -2.482243420  |
| H194  | -10.119508081 | -0.103685711  | -1.301035586  |
| H195  | -8.235595617  | 1.349294607   | -3.085546726  |
| H196  | -10.289847020 | 4.281336570   | -2.595710276  |
| H197  | -4.545796002  | 1.834117964   | 6.566806892   |
| H198  | -6.216339092  | -0.733935966  | 0.910267962   |
| H199  | -9.958946304  | 5.575437247   | 2.313539618   |
| H200  | -10.315987787 | 4.741741677   | 0.779419292   |
| H201  | -10.173813076 | 2.506130288   | 2.367895619   |
| H202  | -7.828368469  | -10.234801024 | 4.792712959   |
| H203  | 1.128654868   | -3.984868171  | -5.960103801  |
| H204  | -3.992694427  | -6.140082912  | -4.765674587  |
| H205  | 5.545518484   | -5.957296010  | -7.349545872  |
| H206  | 6.239720505   | -6.436270042  | -5.779760991  |
| H207  | 5.161193894   | -3.692145853  | -6.627566231  |
| H208  | 9.506947458   | -0.626119006  | -3.857479286  |
| H209  | 7.580387069   | -4.338565322  | -7.105585287  |
| H210  | 1.631077370   | 0.105412318   | -4.257736389  |
| H211  | -0.875527320  | -0.693833599  | -5.842987086  |
| H212  | 7.444307094   | -2.277831082  | -4.140879951  |
| H213  | 8.097148643   | -0.067044654  | -5.995347593  |
| H214  | 7.869806181   | -4.381182642  | -4.169329409  |
| H215  | -0.225671441  | -3.541501669  | -4.933742484  |
| H216  | 5.454287794   | -4.066263087  | -4.925352637  |

|      |              |               |              |
|------|--------------|---------------|--------------|
| H217 | 8.196177780  | -5.585655843  | -5.240852600 |
| H218 | 1.420487436  | 1.584062366   | -7.610642583 |
| H219 | 0.047445600  | 0.727416816   | -3.782400062 |
| H220 | 4.925933526  | -6.998934627  | -4.214445312 |
| H221 | -0.574985848 | -1.416623977  | -4.270939398 |
| H222 | -1.146926030 | 5.354965129   | 0.155709769  |
| H223 | -0.551969020 | 2.676727937   | 0.236916481  |
| H224 | -2.592444534 | 6.858995727   | -4.202296310 |
| H225 | -0.207861835 | 5.130870581   | -4.680351672 |
| H226 | 0.478848243  | 7.792177949   | -1.818400863 |
| H227 | 1.140765982  | 12.577599326  | 0.125677254  |
| H228 | -1.670925060 | 9.952567498   | -0.833154389 |
| H229 | 0.399571604  | 10.360960078  | -2.630208960 |
| H230 | 1.192352556  | 9.618195481   | 0.252914459  |
| H231 | 4.449952438  | 13.344002607  | -2.408039650 |
| H232 | 1.163278211  | 5.681004326   | 1.050264151  |
| H233 | 1.798731649  | 5.889117763   | -0.584868579 |
| H234 | 3.070876079  | 14.162341279  | -0.421608512 |
| H235 | 1.858674533  | 9.434526977   | -2.285440738 |
| H236 | -0.011417174 | 5.048112271   | -2.402212047 |
| H237 | -2.579711671 | 5.095197477   | -4.115805148 |
| H238 | 1.623857435  | 7.829920829   | -5.799948285 |
| H239 | 3.460530625  | 1.419865258   | -0.299428843 |
| H240 | 0.846519719  | 6.998308515   | -7.161928497 |
| H241 | -2.301540406 | -3.279711122  | 9.824088846  |
| H242 | -1.868064547 | -2.328265836  | 8.567801388  |
| H243 | 3.599165932  | 2.237433906   | 4.591382562  |
| H244 | 2.363225283  | 4.133628239   | 2.746656108  |
| H245 | 3.088407349  | 4.282215673   | 6.211633812  |
| H246 | 3.471406120  | 4.016022010   | -0.339014975 |
| H247 | 5.043765539  | 4.951665595   | -1.588874784 |
| H248 | 4.780456142  | 5.892024146   | -0.341862686 |
| H249 | 4.839158689  | 3.153992525   | -3.863038166 |
| H250 | 4.953008617  | 4.291090546   | -5.240185986 |
| H251 | 6.775783406  | 7.119774270   | 7.140285114  |
| H252 | 7.170372019  | 8.855943015   | 7.091733438  |
| H253 | 6.962681558  | 5.965676507   | 5.158344913  |
| H254 | 6.955546904  | 6.765543584   | 3.598138396  |
| H255 | 9.861389122  | 5.504745788   | 2.113359650  |
| H256 | 7.711565276  | 2.299991173   | -0.111539697 |
| H257 | 5.264169678  | 10.147957894  | 0.114832961  |
| H258 | 2.142373790  | 8.263596870   | 3.501842158  |
| H259 | 6.673545751  | 6.554778080   | 1.010326974  |
| H260 | 5.486979947  | 0.904010617   | 3.219343205  |
| H261 | 5.574017034  | 1.681491190   | 5.580105173  |
| H262 | 5.361586183  | 2.305004840   | 1.140924547  |
| H263 | 1.603632803  | 4.904261452   | -6.315194885 |
| H264 | 7.584963470  | 2.483523812   | 7.996469927  |
| H265 | 2.932282860  | 2.571816154   | -5.734761227 |
| H266 | 7.229447142  | 1.178607082   | 3.317582223  |
| H267 | 3.355579413  | 6.751718795   | 1.980539749  |
| H268 | 4.516132563  | 5.935636128   | -3.460474761 |
| H269 | 6.333079927  | 3.710956124   | 8.268655103  |
| H270 | 9.738725894  | 3.884685328   | 1.502442749  |
| H271 | 8.292543890  | 7.071682966   | 1.240911728  |
| H272 | 1.853131107  | 0.192564446   | -6.795336545 |
| H273 | -0.271091321 | 1.702401119   | -6.053310303 |
| H274 | 4.148086960  | 11.660933835  | 1.732157039  |
| H275 | 2.632770586  | 4.108745406   | -3.235857480 |
| H276 | 6.847950290  | 3.620638460   | 3.707129579  |
| H277 | 8.380963036  | 2.454242518   | 1.518940841  |
| H278 | 6.343403776  | 0.848981422   | 1.029835766  |
| H279 | 6.336887578  | 4.383951170   | 0.415373126  |
| H280 | 1.163276493  | 6.457625736   | 6.512375228  |
| H281 | 4.394804630  | 6.732185803   | 5.933107988  |
| H282 | 5.022485322  | 8.477852770   | 8.179084760  |
| H283 | 1.866158655  | 5.428047799   | 7.777877978  |
| H284 | 3.487843378  | 9.095041941   | 5.177931243  |
| H285 | 6.891409749  | -8.282348323  | -0.204738484 |
| H286 | 5.477636978  | -8.992214336  | -1.008771450 |
| H287 | 1.464998892  | -10.412251011 | 1.659329607  |
| H288 | 7.346637222  | -10.381783285 | -1.465652241 |
| H289 | 7.095232577  | -9.545258716  | -2.852182846 |
| H290 | 2.182031670  | -0.628604278  | 7.114217182  |
| H291 | 1.896194092  | 1.881869394   | 8.993882500  |
| H292 | 5.967682139  | 0.811991585   | 8.052305643  |
| H293 | 1.972619255  | 1.078707370   | 6.623275439  |
| H294 | 2.849497497  | 1.208072580   | 10.140352023 |
| H295 | 6.803854788  | -3.553810269  | 4.460847592  |
| H296 | 4.043968248  | -0.067943692  | 8.571143461  |

|       |               |               |              |
|-------|---------------|---------------|--------------|
| H297  | -7.729558312  | -5.890043145  | 0.739761371  |
| H298  | -6.377671443  | -8.634493621  | 0.952639646  |
| H299  | 6.638728460   | -3.984041630  | 2.106275345  |
| H300  | -3.237770321  | -1.695767905  | 4.183731402  |
| H301  | 8.393338993   | -2.339604704  | -0.412677112 |
| H302  | 3.041211121   | -2.584603559  | -3.406854992 |
| H303  | 7.018720905   | -1.342695681  | 0.051648643  |
| H304  | -6.007709879  | -3.919405891  | 1.237944369  |
| H305  | 5.806313757   | -3.722726666  | 0.272324511  |
| H306  | -4.694250831  | -4.836975630  | 0.497368715  |
| H307  | -6.327369315  | -6.475917321  | -0.183727845 |
| H308  | -5.077303358  | -6.719791791  | 2.075180995  |
| H309  | -6.423138475  | -5.842896567  | 2.830215883  |
| H310  | 5.796916257   | 0.346366626   | -5.913198102 |
| H311  | -9.014343684  | -7.862326197  | -0.251616931 |
| H312  | -8.591306161  | -9.358198248  | -2.931648197 |
| H313  | 3.500445297   | -2.030494262  | -1.020062248 |
| H314  | -10.949909046 | -9.194060797  | -1.231942409 |
| H315  | -10.636433500 | -8.455984532  | -2.660593712 |
| H316  | -3.395954362  | -4.657414401  | 2.487887089  |
| H317  | 5.051538857   | -0.210727441  | -0.448478954 |
| H318  | 4.277656042   | -1.392944608  | -5.213749907 |
| H319  | -3.702767044  | -11.945935754 | -0.811749529 |
| H320  | -0.460521575  | -10.922430739 | -0.669210775 |
| H321  | -4.055588896  | -9.583950907  | -0.272269985 |
| H322  | -2.901200526  | -12.351906452 | -2.066168055 |
| H323  | 9.148345981   | -5.081971255  | 3.308491771  |
| H324  | -2.398809714  | -7.604480981  | 1.562662826  |
| H325  | -4.034161259  | -5.999849798  | -2.568779687 |
| H326  | 5.843079826   | -6.228969813  | -0.305037229 |
| H327  | -3.312036105  | -8.152565354  | -3.626281005 |
| H328  | 3.345428177   | -9.474365124  | -3.364604920 |
| H329  | 2.481056827   | -7.184538717  | -2.684189244 |
| H330  | -9.317751224  | -10.671589046 | -1.999243135 |
| H331  | -2.328226150  | -3.017009939  | 3.522014534  |
| H332  | -3.953116303  | -8.975993956  | 2.783116613  |
| H333  | -2.083920410  | -7.206406239  | 3.030138002  |
| H334  | -6.315273792  | -9.182904062  | 3.064705708  |
| H335  | -6.334729814  | -2.646779389  | 2.783416192  |
| H336  | -1.918301394  | -10.821804145 | -6.042513973 |
| H337  | -0.398225752  | -9.059729976  | -3.343139401 |
| H338  | -1.684380725  | -9.618771001  | -2.258343973 |
| H339  | -1.884415017  | -7.501272615  | -4.483471992 |
| H340  | 4.632102154   | -4.613870695  | -1.619074894 |
| H341  | 6.310874094   | 0.996095522   | -2.255949928 |
| H342  | 6.527921061   | 1.485099008   | -4.754867909 |
| H343  | -2.785634597  | -4.954797923  | -1.812683695 |
| H344  | -4.539464847  | -10.061898720 | 1.837508644  |
| H345  | -5.381663119  | -10.394138270 | -0.237066561 |
| H346  | -5.462380842  | -1.198335559  | 3.170273523  |
| H347  | 2.277182720   | -11.357106869 | -1.986091143 |
| H348  | -0.445744280  | -9.458499434  | 0.317494202  |
| H349  | 5.662898150   | -5.036595114  | -3.019473607 |
| H350  | 8.216029846   | -2.515970820  | 4.150681947  |
| H351  | -4.783222971  | -2.930572592  | 6.481887431  |
| H352  | -3.105479103  | -3.475769628  | 6.236300970  |
| H353  | 2.002999959   | -12.676992089 | 1.420139388  |
| H354  | 0.935574317   | -12.913243306 | 0.203119233  |
| H355  | -3.257841542  | -12.979447657 | 1.926289272  |
| H356  | -1.650997902  | -12.062269516 | 0.600834333  |
| H357  | -1.087280840  | -14.042625861 | 3.217984278  |
| H358  | -2.977332516  | -11.611811562 | 3.026762759  |
| H359  | -3.442443945  | -5.448659676  | 8.158155009  |
| H360  | 2.395481594   | 11.750841889  | 6.871279216  |
| H361  | -8.894578997  | -8.822774312  | 4.580946426  |
| H362  | -6.650556154  | -7.459345713  | 5.404680743  |
| H363  | 4.406190789   | 11.676155971  | 4.593743521  |
| H364  | 1.551434946   | 10.580926309  | 4.196161421  |
| H365  | 2.271580524   | 11.985114002  | 3.377354092  |
| H366  | -0.073485294  | -3.574720527  | -1.588347397 |
| H367  | 5.481090855   | 7.988803906   | -0.599746941 |
| H368  | -0.563658252  | -1.587224264  | 1.707828188  |
| H369  | -0.515682765  | -2.383458081  | 1.479019362  |
| H370  | -0.459631769  | -1.184805173  | -0.795109034 |
| H371  | 1.085791035   | 0.660684864   | 0.062657562  |
| Mo372 | 0.165467136   | -6.306826879  | -0.409939307 |
| N373  | -1.830562098  | -0.274521998  | -9.007042320 |
| N374  | -2.325405791  | 3.425227490   | -8.765272831 |
| N375  | -5.049762262  | 4.184053406   | -8.372546600 |
| N376  | -6.192660755  | 1.893824452   | -7.205389711 |

|      |               |               |              |
|------|---------------|---------------|--------------|
| N377 | -4.645794635  | 1.806084292   | -4.815552144 |
| N378 | -5.500332402  | 4.236205511   | -3.542390001 |
| N379 | -8.367933584  | 3.906920751   | -3.347658217 |
| N380 | -8.978774045  | 1.246210721   | -2.388517875 |
| N381 | -7.061529262  | 0.484142954   | -0.493493813 |
| N382 | -6.067391392  | 2.549089651   | 1.328340579  |
| N383 | -8.446344309  | 4.281367937   | 1.544325225  |
| N384 | -10.221721784 | -8.713666825  | -1.764084032 |
| N385 | -8.148874003  | -8.387754139  | -0.087029152 |
| N386 | -4.284949229  | -4.153334757  | 2.418331394  |
| N387 | -5.453072312  | -2.217776293  | 3.043487578  |
| N388 | -3.169361897  | -2.405646629  | 3.454995546  |
| N389 | -7.284284091  | -8.860101383  | 3.278177127  |
| N390 | 1.727309615   | 1.217091084   | -6.707705322 |
| N391 | 0.560643963   | -3.258632492  | -5.525353940 |
| N392 | 2.415124678   | 3.159221314   | -5.061603182 |
| N393 | 1.759320335   | 5.744720227   | -5.762780312 |
| N394 | -0.773293301  | 5.985285348   | -4.697982943 |
| N395 | -0.591262739  | 5.692581752   | -1.863039058 |
| N396 | 2.607136463   | 3.419409339   | -0.231889837 |
| N397 | 1.347259250   | 1.676145022   | 0.003290297  |
| N398 | 0.200084823   | 8.172503539   | -0.917168173 |
| N399 | 3.067694890   | 11.691866992  | -2.445144129 |
| N400 | 2.876086178   | 13.310454310  | -0.939912325 |
| N401 | -2.304318423  | -3.224062458  | 8.802782389  |
| N402 | 2.389917058   | 1.019025258   | 9.244965069  |
| N403 | 5.632632242   | 1.765636415   | 7.944660949  |
| N404 | 6.122454142   | 2.508663245   | 5.285992697  |
| N405 | 7.226847948   | 4.089908932   | 0.856138176  |
| N406 | 9.325769590   | 4.803403900   | 1.612208669  |
| N407 | 7.606021931   | 6.330602881   | 1.363197948  |
| N408 | 3.597197917   | 3.154130498   | 4.099493855  |
| N409 | 2.642495724   | 5.135970528   | 5.859366697  |
| N410 | 4.122296448   | 7.415679237   | 6.639686728  |
| N411 | 6.842829376   | 6.826751373   | 4.609778139  |
| N412 | 3.773377203   | 9.957335516   | 5.636225732  |
| N413 | 7.412785409   | -9.450645207  | -1.882759510 |
| N414 | 5.994010039   | -6.175105224  | -1.319910054 |
| N415 | 6.602351832   | -3.377578933  | -0.301918083 |
| N416 | 7.396798048   | -3.380306625  | 2.445879237  |
| N417 | 8.181420296   | -4.569096004  | -5.130479335 |
| N418 | 7.533937242   | -1.777802307  | -5.031437587 |
| N419 | 1.565497307   | -12.218300435 | 0.616131472  |
| N420 | 1.283905258   | -8.274581220  | -1.260827242 |
| N421 | 2.670823465   | -9.326266175  | -2.619459653 |
| N422 | -1.448331190  | -12.027170566 | 1.599956614  |
| O423 | -2.996425621  | 1.763461250   | -7.360796353 |
| O424 | -4.473031252  | 4.875364417   | -6.278501194 |
| O425 | -7.804604207  | 3.225643404   | -6.281124454 |
| O426 | -6.453233815  | 0.846167342   | -3.822816074 |
| O427 | -5.172227165  | 3.153121713   | -1.572364767 |
| O428 | -8.191473375  | 4.997078571   | -1.348872906 |
| O429 | -10.923814396 | 2.108586663   | -1.524303185 |
| O430 | -8.293427919  | -1.366091269  | 0.083459556  |
| O431 | -6.013773538  | 0.805994548   | 2.823004983  |
| O432 | -8.120844358  | 3.916075978   | 3.760550985  |
| O433 | -11.594187534 | 3.736547327   | 3.166224618  |
| O434 | -7.021593509  | -10.243636445 | -0.889024916 |
| O435 | -9.147711627  | -7.756554774  | 2.502558903  |
| O436 | -7.115839461  | -8.811065304  | 6.859884497  |
| O437 | 0.342247992   | 3.348097236   | -4.106465476 |
| O438 | 1.780774214   | -1.635402354  | -6.549161768 |
| O439 | 2.867475052   | 6.600992266   | -3.949537035 |
| O440 | 5.071676745   | 5.124936801   | -3.328004492 |
| O441 | -0.949943344  | 8.158579759   | -5.429170663 |
| O442 | -2.681731606  | 6.590454839   | -1.677907282 |
| O443 | -0.791209931  | 7.706874896   | 1.088772259  |
| O444 | -0.846632452  | 11.231487111  | 0.527029132  |
| O445 | -5.375086484  | -4.958680757  | 8.595569854  |
| O446 | -2.012999789  | 2.574500988   | 5.987184065  |
| O447 | 3.812836330   | 3.122559256   | 7.760815497  |
| O448 | 7.319701959   | 4.343854565   | 5.981603371  |
| O449 | 4.753951978   | 4.595152537   | 2.752034599  |
| O450 | 1.333266734   | 5.969978675   | 4.163872186  |
| O451 | 0.815091305   | 2.716050735   | 5.360823477  |
| O452 | 2.617318233   | 7.883885745   | 8.295810050  |
| O453 | 5.208544352   | 10.858936193  | 7.161946657  |
| O454 | 6.696932602   | 9.106080951   | 4.498153570  |
| O455 | 2.869140384   | 13.416587526  | 5.786148876  |
| O456 | 5.050894629   | 7.474299739   | 0.110180446  |



|                  |      |               |                                   |              |
|------------------|------|---------------|-----------------------------------|--------------|
|                  | O457 | 6.256211858   | -7.357946739                      | -3.270740328 |
|                  | O458 | 7.459078252   | -3.350876067                      | -2.428153436 |
|                  | O459 | 8.709530562   | -1.542758394                      | 2.066838938  |
|                  | O460 | 8.899486626   | -4.957466003                      | 5.332086763  |
|                  | O461 | 7.449012311   | -1.879575088                      | -7.309305297 |
|                  | O462 | 3.072292776   | -5.926512077                      | -6.422135113 |
|                  | O463 | 4.021836123   | -6.876912497                      | -4.639279104 |
|                  | O464 | 8.669958322   | 1.176811349                       | -3.411683036 |
|                  | O465 | -0.098889090  | -11.443239780                     | 3.323867712  |
|                  | O466 | -2.509315783  | -13.637860980                     | 4.624336364  |
|                  | O467 | -1.965640554  | -4.002352773                      | -4.079610751 |
|                  | O468 | -3.418539598  | -5.394308909                      | -5.026268468 |
|                  | O469 | -2.252755216  | -11.473630225                     | -3.876730673 |
|                  | O470 | -1.655019972  | -10.037619863                     | -5.514988300 |
|                  | O471 | -1.647232397  | -7.615240663                      | -0.122665232 |
|                  | O472 | -3.666365174  | -8.067956466                      | -1.013276013 |
|                  | O473 | -0.717337239  | -6.495725265                      | -2.309430152 |
|                  | O474 | -4.615229529  | -9.712684309                      | 2.764876014  |
|                  | O475 | -2.805827559  | -7.541155712                      | 2.464043051  |
|                  | O476 | 4.910489853   | 4.945513651                       | -0.598640773 |
|                  | O477 | -3.237475815  | -12.718074730                     | -1.222098130 |
|                  | O478 | -4.437968088  | -10.442846277                     | 0.066773994  |
|                  | S479 | 3.883740590   | 0.076124491                       | 5.517141770  |
|                  | S480 | 3.468151533   | -1.333195086                      | 1.771396887  |
|                  | S481 | 2.018781852   | -5.041038384                      | -1.277731657 |
|                  | S482 | 0.683892711   | -1.025864606                      | 3.684076752  |
|                  | S483 | 0.873434346   | -1.403194277                      | -0.622137787 |
|                  | S484 | 4.504942521   | -5.152373096                      | 1.490773153  |
|                  | S485 | -1.357089568  | -4.598237750                      | 0.326783444  |
|                  | S486 | 3.122871713   | -3.560587401                      | 4.671914535  |
|                  | S487 | 1.106511868   | -7.023166840                      | 1.671986167  |
|                  | S488 | -0.746295671  | -4.629997438                      | 4.060927583  |
| <b>2 (S=1/2)</b> |      |               | <b>bm12b6x2h2nconexadti.car_2</b> |              |
| Fe(139) 1.919    | C1   | -2.043339037  | -3.061182463                      | -8.992707147 |
| Fe(140) -0.544   | C2   | -2.414220312  | -1.664438634                      | -8.485142126 |
| Fe(141) 2.690    | C3   | -2.510180974  | 0.738204889                       | -9.003564140 |
| Fe(142) -2.696   | C4   | -3.960567020  | 1.026495339                       | -8.618367634 |
| Fe(143) 3.187    | C5   | -6.320607873  | 0.478481748                       | -8.918496487 |
| Fe(144) -2.502   | C6   | -6.681230525  | -0.011426798                      | -7.511288228 |
| Fe(145) -1.578   | C7   | -6.106013735  | -1.524431287                      | -5.672354911 |
|                  | C8   | -5.547471277  | -0.551638399                      | -4.630554349 |
|                  | C9   | -3.771239977  | 0.991269099                       | -4.002622408 |
|                  | C10  | -4.609475963  | 2.272852365                       | -3.892304573 |
|                  | C11  | -5.992938210  | 3.928547003                       | -4.998983939 |
|                  | C12  | -7.372067149  | 3.730525270                       | -4.355392228 |
|                  | C13  | -9.432743340  | 2.405479595                       | -4.306039099 |
|                  | C14  | -9.649017275  | 1.710213786                       | -2.956039331 |
|                  | C15  | -8.858616127  | -0.028804520                      | -1.405992786 |
|                  | C16  | -7.899210759  | 0.252536800                       | -0.249026925 |
|                  | C17  | -5.886823649  | 1.492023670                       | 0.473918690  |
|                  | C18  | -5.984593271  | 2.959997425                       | 0.917162052  |
|                  | C19  | -4.475932802  | 1.075246342                       | -0.023644829 |
|                  | C20  | -3.375068436  | 1.514309010                       | 0.948916649  |
|                  | C21  | -4.409285132  | -0.436019194                      | -0.273881070 |
|                  | C22  | -5.786022286  | 5.326397632                       | 0.299235611  |
|                  | C23  | -7.258349022  | 5.776602130                       | 0.348397246  |
|                  | C24  | -4.920493228  | 6.179096259                       | -0.657310924 |
|                  | C25  | -5.117668742  | 7.675506964                       | -0.390455644 |
|                  | C26  | -3.438378461  | 5.800091852                       | -0.533317939 |
|                  | C27  | -9.435778730  | 5.817797288                       | -0.720092717 |
|                  | C28  | -10.203574250 | 5.356981060                       | 0.503415903  |
|                  | C29  | -10.031771258 | -8.574023498                      | 2.218960823  |
|                  | C30  | -8.895034042  | -8.071082933                      | 3.111012215  |
|                  | C31  | -7.984301927  | -5.988709921                      | 4.162730381  |
|                  | C32  | -8.723494371  | -5.482143226                      | 5.416275506  |
|                  | C33  | -7.405924275  | -4.835426555                      | 3.325553741  |
|                  | C34  | -6.355259642  | -3.993882005                      | 4.053545296  |
|                  | C35  | -5.632044986  | -3.076024941                      | 3.064886613  |
|                  | C36  | -4.442067963  | -1.020212270                      | 3.865697440  |
|                  | C37  | -8.717447000  | -5.406153720                      | 7.866419311  |
|                  | C38  | -8.030447498  | -4.244323180                      | 8.551904818  |
|                  | C39  | 0.717234843   | -1.253068271                      | -5.696178411 |
|                  | C40  | 1.201847252   | 0.193383036                       | -5.521136878 |
|                  | C41  | 0.506970862   | -1.834700190                      | -4.278402562 |
|                  | C42  | -0.309624645  | -3.145521230                      | -4.190754880 |
|                  | C43  | 0.533806763   | -4.414189475                      | -4.267891183 |
|                  | C44  | 3.214582779   | 1.621180238                       | -5.390709406 |
|                  | C45  | 2.733787315   | 2.806872789                       | -6.236397409 |

|      |              |              |              |
|------|--------------|--------------|--------------|
| C46  | 4.741511010  | 1.382743778  | -5.523089793 |
| C47  | 1.704263351  | 3.511804827  | -8.349246804 |
| C48  | 0.324120565  | 4.018831104  | -7.905641690 |
| C49  | -1.545799868 | 3.738663558  | -6.338678304 |
| C50  | -1.371594233 | 4.489660106  | -5.009538982 |
| C51  | 0.074361912  | 5.073501676  | -3.123229903 |
| C52  | 0.266830403  | 6.544862392  | -3.543683321 |
| C53  | 1.397422144  | 4.670458736  | -2.448766599 |
| C54  | 1.515016859  | 3.299199093  | -1.863974529 |
| C55  | 0.617370733  | 2.536754850  | -1.143722383 |
| C56  | 2.566706713  | 1.499682601  | -1.247309339 |
| C57  | 1.530810568  | 8.023170914  | -5.027481610 |
| C58  | 0.321164427  | 8.893642305  | -5.366603937 |
| C59  | 2.452095696  | 7.868865650  | -6.256475674 |
| C60  | 3.335666566  | 9.042715020  | -6.562576872 |
| C61  | 3.208932756  | 10.376707276 | -6.226730730 |
| C62  | 5.076220020  | 10.042481277 | -7.370194007 |
| C63  | -4.039395975 | 1.291469712  | 8.610082891  |
| C64  | -4.682662929 | 0.099064800  | 9.293331855  |
| C65  | -3.776756303 | 0.882880776  | 7.140470245  |
| C66  | -3.208595629 | 2.010334425  | 6.311715333  |
| C67  | -4.045180765 | 2.911622000  | 5.624157804  |
| C68  | -1.817558168 | 2.189227236  | 6.201995481  |
| C69  | -3.513204984 | 3.944786032  | 4.843679666  |
| C70  | -1.272906284 | 3.226229774  | 5.444465275  |
| C71  | -2.124118950 | 4.097492294  | 4.758190065  |
| C72  | 3.831567086  | 4.060115470  | 6.919797851  |
| C73  | 4.810366947  | 4.926833724  | 6.116554995  |
| C74  | 2.992073050  | 3.197570933  | 5.967681072  |
| C75  | 7.167073315  | 5.286785816  | 5.498205503  |
| C76  | 7.276958985  | 4.997678773  | 3.999237796  |
| C77  | 6.459596434  | 3.659700600  | 2.091858240  |
| C78  | 5.227252353  | 4.339641452  | 1.453851650  |
| C79  | 6.495040133  | 2.134308767  | 1.879140434  |
| C80  | 6.425343684  | 1.635764750  | 0.430094702  |
| C81  | 7.631441041  | 1.955144190  | -0.465137949 |
| C82  | 8.467693785  | 4.155201155  | -1.279100443 |
| C83  | 2.840103090  | 4.795297691  | 1.527951559  |
| C84  | 2.722987633  | 6.320326725  | 1.692619054  |
| C85  | 1.555042983  | 4.168462540  | 2.093968066  |
| C86  | 2.933691215  | 8.156919516  | 3.293961397  |
| C87  | 3.941226000  | 9.298366102  | 3.243190295  |
| C88  | 6.134253127  | 10.096729599 | 2.473741639  |
| C89  | 5.879884117  | 11.205440200 | 1.431497007  |
| C90  | 7.522143797  | 9.456173399  | 2.281382995  |
| C91  | 7.669029414  | 8.757084329  | 0.931878463  |
| C92  | 4.734178059  | 11.818647871 | -0.642715307 |
| C93  | 4.240063635  | 13.189138245 | -0.203327160 |
| C94  | 3.707237460  | 11.183712273 | -1.616801247 |
| C95  | 4.173079030  | 9.837481637  | -2.118806749 |
| C96  | 5.087272066  | 9.748283212  | -3.179636435 |
| C97  | 3.757962201  | 8.647563524  | -1.497729767 |
| C98  | 5.578343663  | 8.515346844  | -3.612570883 |
| C99  | 4.260717637  | 7.407335579  | -1.900230089 |
| C100 | 5.168421270  | 7.353066367  | -2.955777020 |
| C101 | 5.675061579  | -8.620027526 | 3.144762085  |
| C102 | 5.723057554  | -7.899087398 | 1.802126828  |
| C103 | 5.177917086  | -5.781492508 | 0.645169246  |
| C104 | 6.223244544  | -4.668532926 | 0.509887938  |
| C105 | 7.056963587  | -2.578818146 | 1.477675473  |
| C106 | 7.580921135  | -2.076459764 | 2.819094091  |
| C107 | 7.323436628  | -1.941447370 | 5.250646665  |
| C108 | 8.037459945  | -2.935936621 | 6.139889515  |
| C109 | 6.743511713  | -7.052090932 | -3.325279204 |
| C110 | 7.097020930  | -5.799640360 | -4.138465904 |
| C111 | 5.205993355  | -7.104669347 | -3.142766055 |
| C112 | 4.735800912  | -8.417984262 | -2.523474133 |
| C113 | 3.232713702  | -8.519457274 | -2.376555277 |
| C114 | 7.397450425  | -3.362856737 | -4.110210575 |
| C115 | 8.464237723  | -2.570311858 | -3.378674015 |
| C116 | 6.112737552  | -2.568193569 | -4.447793299 |
| C117 | 5.181907633  | -2.490774083 | -3.267408254 |
| C118 | 5.377344294  | -1.542676033 | -2.251234755 |
| C119 | 4.176463350  | -3.457617949 | -3.104524050 |
| C120 | 4.624011226  | -1.604638751 | -1.076219355 |
| C121 | 3.423620097  | -3.519223908 | -1.928925966 |
| C122 | 3.668463677  | -2.607008554 | -0.899814304 |
| C123 | -0.288858943 | -9.200526387 | 6.017572180  |
| C124 | -1.424145014 | -9.091495828 | 7.047272410  |
| C125 | -0.791935717 | -9.247508549 | 4.564705510  |

|       |              |               |               |
|-------|--------------|---------------|---------------|
| C126  | 0.273481415  | -9.177556596  | 3.513825433   |
| C127  | 1.099078685  | -10.206724002 | 3.110205222   |
| C128  | 1.492651406  | -8.416493372  | 1.870751634   |
| C129  | -3.662552053 | -9.717892074  | 7.774132542   |
| C130  | -3.205096048 | -10.111022825 | 9.160189610   |
| C131  | -3.279761940 | -6.016292641  | -1.365024284  |
| C132  | -3.507275011 | -5.999775089  | 0.118899909   |
| C133  | -2.677356310 | -7.084941207  | 0.919223977   |
| C134  | -2.978607306 | -8.502729820  | 0.355277539   |
| C135  | -2.339243670 | -9.610830327  | 1.208759530   |
| C136  | -2.773375163 | -10.993679038 | 0.819517692   |
| C137  | -3.228378650 | -7.052273934  | 2.378766453   |
| C138  | 1.083948031  | -2.642487159  | 3.350403076   |
| Fe139 | 1.791788065  | -4.462104440  | 3.293519500   |
| Fe140 | 0.815145135  | -1.031018484  | 2.287306004   |
| Fe141 | 0.737786854  | -1.380907528  | 4.832373266   |
| Fe142 | 2.980447874  | -2.292528470  | 3.856567935   |
| Fe143 | 2.803706333  | 0.299008432   | 4.185992742   |
| Fe144 | -0.449680766 | -3.626998427  | 4.160798063   |
| Fe145 | 0.192416574  | -3.478868247  | 1.474772969   |
| H146  | -2.541178384 | -4.029084804  | -7.268413506  |
| H147  | -0.926737881 | -3.860647271  | -7.475832764  |
| H148  | -1.769267711 | -0.832762530  | -10.249892719 |
| H149  | -1.169810708 | -2.995123774  | -9.659898353  |
| H150  | -2.887635351 | -3.389492909  | -9.624747855  |
| H151  | -1.891482054 | 1.044558552   | -8.148013913  |
| H152  | -4.641095067 | -0.366613692  | -9.967435865  |
| H153  | -2.240640078 | 1.374229319   | -9.857870358  |
| H154  | -6.928036552 | -0.071363640  | -9.649970717  |
| H155  | -5.119117800 | -1.342502553  | -7.552058398  |
| H156  | -6.602699860 | 1.538710644   | -8.965699913  |
| H157  | -3.682354178 | 0.581580601   | -2.988584303  |
| H158  | -3.813595800 | -0.299163030  | -5.728043772  |
| H159  | -5.594232831 | -2.492043240  | -5.579052331  |
| H160  | -5.483579985 | 4.714717941   | -4.426873688  |
| H161  | -4.953166002 | 2.292880748   | -5.935651495  |
| H162  | -7.167906430 | -1.668421605  | -5.440888069  |
| H163  | -2.758883412 | 1.235450102   | -4.353034562  |
| H164  | -7.664520790 | 1.982896570   | -5.427837830  |
| H165  | -6.134832034 | 4.282070947   | -6.029571228  |
| H166  | -5.175953149 | -0.765315458  | -0.989596325  |
| H167  | -3.425648354 | -0.711020215  | -0.685745905  |
| H168  | -4.543076819 | -0.999249527  | 0.663134849   |
| H169  | -4.306670621 | 1.589130324   | -0.983072472  |
| H170  | -9.932801275 | 1.794302094   | -5.071867300  |
| H171  | -3.257518134 | 4.744289308   | -0.781401804  |
| H172  | -7.671615894 | 4.939617421   | -1.520759047  |
| H173  | -6.161665923 | 7.989711573   | -0.536556786  |
| H174  | -2.389212452 | 1.257318218   | 0.533137455   |
| H175  | -3.457099551 | 0.997464928   | 1.916093834   |
| H176  | -4.784334613 | 2.110484001   | 8.603760454   |
| H177  | -2.833418603 | 6.413233085   | -1.216902936  |
| H178  | -4.486862495 | 8.262565485   | -1.073163074  |
| H179  | -3.078718734 | 5.979131205   | 0.493261844   |
| H180  | -4.829761380 | 7.929404708   | 0.642518549   |
| H181  | -5.247617780 | 5.967150259   | -1.691680532  |
| H182  | -5.421023015 | 5.465363594   | 1.327748515   |
| H183  | -5.362930922 | 3.619806511   | -0.948630096  |
| H184  | -3.384667560 | 2.598380988   | 1.136581163   |
| H185  | 1.673496645  | 3.071206342   | 2.144368169   |
| H186  | 0.740903447  | 4.401234629   | 1.390280545   |
| H187  | 0.305059984  | 4.800239044   | 3.477813237   |
| H188  | -2.220699474 | 5.617475499   | 3.550372377   |
| H189  | -0.191992986 | 3.327471346   | 5.344833354   |
| H190  | -1.142379436 | 1.476323934   | 6.680357862   |
| H191  | -5.131965487 | 2.806202901   | 5.690508009   |
| H192  | -6.873988509 | 1.565227634   | -1.429725010  |
| H193  | -8.728295162 | -1.088035999  | -1.675587308  |
| H194  | -9.879819448 | 0.102041107   | -1.025089060  |
| H195  | -7.943444420 | 0.556557760   | -3.232583264  |
| H196  | -9.947724043 | 3.373165353   | -4.245687070  |
| H197  | -4.177768555 | 4.614937560   | 4.293185362   |
| H198  | -6.134613464 | 0.908141225   | 1.368468279   |
| H199  | -9.545672456 | 6.910323720   | -0.812315174  |
| H200  | -9.906422404 | 5.352087379   | -1.600257400  |
| H201  | -9.799407998 | 4.440831919   | 0.994738018   |
| H202  | -8.738957658 | -6.269718122  | 8.548172998   |
| H203  | 0.925484110  | -6.157564077  | -3.261410212  |
| H204  | -4.770845513 | -7.233486691  | -1.502135364  |
| H205  | 5.066568681  | -9.274403783  | -3.138409046  |

|      |              |               |              |
|------|--------------|---------------|--------------|
| H206 | 5.182550329  | -8.566122843  | -1.523939473 |
| H207 | 4.725324213  | -6.972215227  | -4.125565691 |
| H208 | 9.219113857  | -3.202808257  | -2.854194205 |
| H209 | 7.029670745  | -7.888653869  | -3.982127319 |
| H210 | 1.493031368  | -1.975815294  | -3.807259145 |
| H211 | -1.047925024 | -3.186128087  | -5.009511792 |
| H212 | 6.986855146  | -4.623203782  | -2.429555658 |
| H213 | 7.881971745  | -3.633101839  | -5.070772403 |
| H214 | 7.334423132  | -6.417971345  | -1.436608483 |
| H215 | -0.346335368 | -5.182866896  | -2.548993351 |
| H216 | 4.874571136  | -6.260258090  | -2.519728364 |
| H217 | 7.378136993  | -8.039501772  | -1.640717684 |
| H218 | 1.474666596  | -2.001316300  | -7.466391059 |
| H219 | -0.017540452 | -1.071702561  | -3.685522963 |
| H220 | 3.550236161  | -10.206696923 | -1.501360126 |
| H221 | -0.885757565 | -3.142248396  | -3.255055106 |
| H222 | -0.760732950 | 5.059152147   | -2.409877630 |
| H223 | -0.421826436 | 2.695894554   | -0.872545864 |
| H224 | -2.046578031 | 4.438898953   | -7.017914169 |
| H225 | 0.141104562  | 2.465316830   | -6.544897018 |
| H226 | 1.426050806  | 5.884278954   | -5.121046589 |
| H227 | 2.449670830  | 10.918090800  | -5.672944914 |
| H228 | -0.510907803 | 8.329151142   | -5.853479460 |
| H229 | 1.842631290  | 7.599743500   | -7.138342327 |
| H230 | 2.082674818  | 8.496013347   | -4.198638926 |
| H231 | 6.018105343  | 10.267080774  | -7.863952859 |
| H232 | 1.571291278  | 5.422132543   | -1.659534823 |
| H233 | 2.213226306  | 4.786899593   | -3.177504337 |
| H234 | 4.547454775  | 11.984556970  | -6.673227613 |
| H235 | 3.110498646  | 7.005641603   | -6.069584765 |
| H236 | 0.396135023  | 3.499375047   | -4.557001578 |
| H237 | -2.229999338 | 2.892456156   | -6.182612354 |
| H238 | 2.351796160  | 4.397547975   | -8.409513955 |
| H239 | 3.309266118  | 0.721445271   | -1.102678795 |
| H240 | 1.608116455  | 3.098579444   | -9.361979350 |
| H241 | 0.961237607  | 0.605929547   | -0.212943877 |
| H242 | -2.994865492 | 2.114866577   | 10.168044696 |
| H243 | -2.247015830 | 2.273619941   | 8.724106086  |
| H244 | 3.962924001  | 3.598302287   | 2.944147672  |
| H245 | 2.865085575  | 4.603110648   | 0.445417030  |
| H246 | 3.745486392  | 6.221823551   | 3.467452557  |
| H247 | 4.287140721  | 3.245610582   | -2.451101259 |
| H248 | 5.373833566  | 2.864319369   | -4.380536026 |
| H249 | 5.091232214  | 4.528123268   | -2.957732514 |
| H250 | 4.998030221  | 0.568620510   | -4.817912767 |
| H251 | 4.957500003  | 1.024311072   | -6.542358473 |
| H252 | 7.712249390  | 8.772630134   | 3.121487587  |
| H253 | 8.263293955  | 10.266547039  | 2.319270747  |
| H254 | 7.788761473  | 6.861613497   | 1.846860262  |
| H255 | 7.781385071  | 6.893185585   | 0.093823088  |
| H256 | 10.386094840 | 4.681569905   | -0.789191145 |
| H257 | 7.742712941  | 1.178232424   | -1.237389825 |
| H258 | 6.275372462  | 8.461510621   | -4.452525457 |
| H259 | 3.021225462  | 8.664723454   | -0.689957580 |
| H260 | 7.238398214  | 5.553765036   | -2.145905403 |
| H261 | 5.657901056  | 1.677953187   | 2.431179448  |
| H262 | 5.926698134  | 3.446793599   | 4.153208902  |
| H263 | 5.498492442  | 1.975652178   | -0.058558290 |
| H264 | 2.303838092  | 1.533638208   | -7.783134883 |
| H265 | 8.137440724  | 5.053832143   | 5.957831979  |
| H266 | 3.026977322  | -0.487443427  | -5.971323871 |
| H267 | 7.421290186  | 1.757948761   | 2.345319823  |
| H268 | 3.967499440  | 6.495973087   | -1.378805161 |
| H269 | 6.064534829  | 6.157062777   | -4.208690383 |
| H270 | 7.005380402  | 6.370561472   | 5.584721443  |
| H271 | 10.016525020 | 3.008940809   | -0.552213380 |
| H272 | 8.918268871  | 5.891322596   | -2.232626441 |
| H273 | 1.644554706  | -3.030140138  | -6.161264781 |
| H274 | -0.275844920 | -1.173520211  | -6.177642413 |
| H275 | 5.419871950  | 10.658603153  | -3.684603457 |
| H276 | 2.988966039  | 1.903897499   | -4.349753731 |
| H277 | 7.325854035  | 4.131811347   | 1.611881458  |
| H278 | 8.546489903  | 1.937587801   | 0.142615705  |
| H279 | 6.355082043  | 0.540013330   | 0.482555137  |
| H280 | 6.597906462  | 3.436100725   | -1.615993683 |
| H281 | 2.054939998  | 8.488354294   | 2.720999900  |
| H282 | 5.243821295  | 8.144768527   | 2.162292506  |
| H283 | 6.132635778  | 10.616966439  | 3.443265252  |
| H284 | 2.631773589  | 8.044483960   | 4.345442857  |
| H285 | 4.547039716  | 10.005463197  | 0.467476988  |

|      |               |               |              |
|------|---------------|---------------|--------------|
| H286 | 5.934620263   | -7.919104044  | 3.953808661  |
| H287 | 4.612973949   | -8.900022318  | 3.301839487  |
| H288 | 0.316287579   | -8.292443357  | 6.151737083  |
| H289 | 6.281713280   | -10.449949046 | 3.823629354  |
| H290 | 6.533380701   | -10.203877936 | 2.218763455  |
| H291 | 2.357527815   | 2.533079030   | 6.568484040  |
| H292 | 2.500294886   | 5.585611046   | 7.150630139  |
| H293 | 6.370719157   | 3.752312599   | 6.749056440  |
| H294 | 2.355322232   | 3.841774303   | 5.345246465  |
| H295 | 3.478841982   | 5.386789539   | 8.445042257  |
| H296 | 6.434891166   | -1.555642020  | 5.774992308  |
| H297 | 4.401893140   | 3.396819130   | 7.588626956  |
| H298 | -8.238100043  | -4.198529457  | 2.981219642  |
| H299 | -7.175380129  | -6.670032217  | 4.452694917  |
| H300 | 6.098185800   | -3.048705867  | 3.908542029  |
| H301 | -3.231019622  | 0.482987712   | 4.518098319  |
| H302 | 7.927228675   | -2.815949905  | 0.853849768  |
| H303 | 2.647989951   | -4.277712727  | -1.807096399 |
| H304 | 6.554162527   | -1.717504736  | 1.006667554  |
| H305 | -6.330955213  | -2.374498216  | 2.586874971  |
| H306 | 5.364622700   | -3.766640421  | 2.127945004  |
| H307 | -5.203633634  | -3.681215087  | 2.250243467  |
| H308 | -6.951315401  | -5.293889224  | 2.431651859  |
| H309 | -5.603152519  | -4.639671382  | 4.532505392  |
| H310 | -6.821665768  | -3.386949776  | 4.846417421  |
| H311 | 5.618188751   | -3.070224962  | -5.291837845 |
| H312 | -9.753152744  | -6.271540574  | 2.968190833  |
| H313 | -9.571672597  | -8.803581536  | 1.245429545  |
| H314 | 3.117623774   | -2.670538028  | 0.038047826  |
| H315 | -11.832826576 | -7.714566246  | 2.729977762  |
| H316 | -11.551251638 | -7.731393678  | 1.116785669  |
| H317 | -3.629835054  | -2.855933822  | 3.727452773  |
| H318 | 4.780018507   | -0.884407164  | -0.269920777 |
| H319 | 3.986966922   | -4.172801348  | -3.909057151 |
| H320 | -4.866511692  | -10.646830655 | 4.435689543  |
| H321 | -1.349338016  | -10.188392178 | 4.411194629  |
| H322 | -4.987863512  | -8.287135879  | 3.901640454  |
| H323 | -4.136051791  | -11.633119116 | 3.494763155  |
| H324 | 8.396489364   | -3.861327403  | 5.628029957  |
| H325 | -3.075395019  | -5.920015413  | 4.770330505  |
| H326 | -4.573891699  | -6.137920438  | 0.351767658  |
| H327 | 5.021116530   | -6.175994781  | 2.717553997  |
| H328 | -4.070407847  | -8.650049761  | 0.329845915  |
| H329 | 2.557004740   | -10.214603146 | 1.540780890  |
| H330 | 1.927782037   | -7.778809613  | 1.109543326  |
| H331 | -10.363587224 | -9.535491659  | 2.646834360  |
| H332 | -2.494799774  | -1.086789844  | 4.559133262  |
| H333 | -4.795531458  | -6.404736691  | 6.383592930  |
| H334 | -2.746386204  | -4.878706912  | 5.876259582  |
| H335 | -7.184413198  | -6.234668935  | 6.599205409  |
| H336 | -6.441970772  | -0.606771630  | 3.517104937  |
| H337 | -2.753366887  | -12.229179213 | -0.612954923 |
| H338 | -1.245569575  | -9.536748686  | 1.120941441  |
| H339 | -2.604072754  | -9.485556844  | 2.264755393  |
| H340 | -2.592199748  | -8.565356967  | -0.672171097 |
| H341 | 4.170965434   | -5.334280186  | 0.660753368  |
| H342 | 6.145301736   | -0.775719924  | -2.375154285 |
| H343 | 6.428923999   | -1.568864050  | -4.783469498 |
| H344 | -3.175536237  | -5.026486231  | 0.504558475  |
| H345 | -5.507735241  | -7.726110151  | 5.975168297  |
| H346 | -6.390528459  | -8.872756532  | 4.235467883  |
| H347 | -5.465036982  | 0.770084919   | 3.888922893  |
| H348 | 1.201478899   | -11.224485815 | 3.469977308  |
| H349 | -1.494089860  | -8.419142737  | 4.406829232  |
| H350 | 5.269037724   | -6.437950001  | -0.224915563 |
| H351 | 8.009876654   | -1.095450558  | 5.080731821  |
| H352 | -4.735533654  | 0.546643265   | 6.717124188  |
| H353 | -3.086320643  | 0.024013593   | 7.132782152  |
| H354 | 0.948160761   | -10.244963576 | 7.275933673  |
| H355 | 0.002926647   | -11.210112479 | 6.352633431  |
| H356 | -4.423611783  | -10.451163048 | 7.461425835  |
| H357 | -2.763924808  | -10.219824338 | 5.908093923  |
| H358 | -2.315932509  | -10.784799094 | 9.190892910  |
| H359 | -4.147473709  | -8.728625030  | 7.805480556  |
| H360 | -3.956974156  | -0.671623704  | 9.650733446  |
| H361 | 3.719817530   | 13.210856077  | 0.782769542  |
| H362 | -9.759342877  | -5.097289002  | 7.672959216  |
| H363 | -7.475799838  | -3.553045770  | 7.872180930  |
| H364 | 5.690611217   | 11.963729597  | -1.172804374 |
| H365 | 2.736237464   | 11.086259052  | -1.106022477 |

|       |               |               |              |
|-------|---------------|---------------|--------------|
| H366  | 3.571520262   | 11.886702748  | -2.451805569 |
| H367  | -0.688313698  | -1.427677148  | -0.187894346 |
| H368  | -0.516494141  | -3.933454282  | 0.222213265  |
| H369  | -0.792271929  | -0.597318694  | 2.266062185  |
| H370  | -0.817242332  | -1.417131402  | 2.358779400  |
| Mo371 | -0.445265359  | -5.843963281  | 2.533667919  |
| N372  | -1.797809570  | -4.066512931  | -7.971175414 |
| N373  | -2.248853054  | -0.646223611  | -9.372938716 |
| N374  | -4.917272962  | 0.307824068   | -9.258467820 |
| N375  | -5.952485619  | -1.053472961  | -7.040410004 |
| N376  | -4.341830617  | 0.004748435   | -4.908532286 |
| N377  | -5.179969618  | 2.724157289   | -5.035727052 |
| N378  | -8.053893838  | 2.613186104   | -4.722387764 |
| N379  | -8.702524418  | 0.800869727   | -2.588560954 |
| N380  | -6.929193269  | 1.171633284   | -0.492397310 |
| N381  | -5.682170999  | 3.902171087   | -0.019303758 |
| N382  | -8.048078634  | 5.400819530   | -0.691230472 |
| N383  | -11.104153949 | -7.592109616  | 2.023806871  |
| N384  | -8.932236182  | -6.748655210  | 3.357127885  |
| N385  | -4.518293963  | -2.342115465  | 3.667638101  |
| N386  | -5.521416528  | -0.226517417  | 3.707003929  |
| N387  | -3.252579622  | -0.474593518  | 4.170134383  |
| N388  | -8.115443785  | -5.763500249  | 6.595026353  |
| N389  | 1.684208137   | -2.042438155  | -6.466335220 |
| N390  | 0.364069690   | -5.304813009  | -3.271258722 |
| N391  | 2.527107079   | 0.374799183   | -5.713901306 |
| N392  | 2.309404901   | 2.508400817   | -7.494177533 |
| N393  | -0.326487100  | 3.272367010   | -6.972275966 |
| N394  | -0.247004168  | 4.239830234   | -4.279970656 |
| N395  | 2.733320561   | 2.637601213   | -1.920026556 |
| N396  | 1.306492090   | 1.406210982   | -0.765365358 |
| N397  | 1.057723569   | 6.705171047   | -4.639434652 |
| N398  | 4.506344243   | 8.847609677   | -7.277624419 |
| N399  | 4.325853903   | 10.995506739  | -6.748370747 |
| N400  | -2.788501107  | 1.620211608   | 9.296852265  |
| N401  | 2.929597426   | 4.872666043   | 7.749864384  |
| N402  | 6.125485837   | 4.582180943   | 6.215836808  |
| N403  | 6.561934244   | 3.959799192   | 3.519332002  |
| N404  | 7.505312916   | 3.253983681   | -1.134099452 |
| N405  | 9.748708286   | 3.906111503   | -0.941125446 |
| N406  | 8.170658042   | 5.395058805   | -1.753026193 |
| N407  | 4.045426176   | 4.221838546   | 2.116683137  |
| N408  | 3.358230350   | 6.867426641   | 2.772619469  |
| N409  | 5.081497227   | 9.085504555   | 2.523070667  |
| N410  | 7.758077783   | 7.404764617   | 0.975889454  |
| N411  | 4.921761705   | 10.950429910  | 0.508007947  |
| N412  | 6.597946345   | -9.758969205  | 3.140601238  |
| N413  | 5.350520081   | -6.595428107  | 1.839059786  |
| N414  | 6.177151234   | -3.730122265  | 1.479102847  |
| N415  | 6.956752971   | -2.485549787  | 3.955207663  |
| N416  | 7.570734487   | -7.153652249  | -2.114489079 |
| N417  | 7.172541889   | -4.631575369  | -3.438600260 |
| N418  | 0.572245627   | -10.357873702 | 6.330024747  |
| N419  | 0.534426133   | -8.058261725  | 2.723072111  |
| N420  | 1.860703194   | -9.705691532  | 2.077729415  |
| N421  | -2.579493971  | -9.772844726  | 6.804530272  |
| O422  | -2.897409140  | -1.473698546  | -7.353027204 |
| O423  | -4.232994475  | 1.885391543   | -7.765072785 |
| O424  | -7.610559994  | 0.512202557   | -6.875247492 |
| O425  | -6.174406038  | -0.278422530  | -3.594088131 |
| O426  | -4.750247910  | 2.862228526   | -2.808198779 |
| O427  | -7.8411171840 | 4.579370202   | -3.578900670 |
| O428  | -10.665223503 | 1.952993463   | -2.291803589 |
| O429  | -8.029934721  | -0.363429355  | 0.820714388  |
| O430  | -6.330908385  | 3.251224834   | 2.072191438  |
| O431  | -7.705304799  | 6.447033545   | 1.293319396  |
| O432  | -11.224926566 | 5.898631936   | 0.898587744  |
| O433  | -8.027049369  | -8.873378592  | 3.516094528  |
| O434  | -9.806340037  | -4.879348853  | 5.310298021  |
| O435  | -8.083879819  | -4.046593770  | 9.755662207  |
| O436  | 0.421643535   | 1.120534653   | -5.210755719 |
| O437  | 1.343762620   | -4.607665491  | -5.202983024 |
| O438  | 2.719921957   | 3.962069316   | -5.782716530 |
| O439  | 5.520738017   | 2.539217669   | -5.312162886 |
| O440  | -0.139151749  | 5.045435712   | -8.422619954 |
| O441  | -2.229926342  | 5.305333191   | -4.649810350 |
| O442  | -0.171964261  | 7.496332091   | -2.888514410 |
| O443  | 0.250976585   | 10.097234534  | -5.178154991 |
| O444  | -5.888873267  | -0.045095842  | 9.432928397  |
| O445  | -1.534864094  | 5.081760844   | 3.989082882  |

|                |      |               |                                             |              |
|----------------|------|---------------|---------------------------------------------|--------------|
|                | O446 | 4.432187457   | 5.892811544                                 | 5.429357553  |
|                | O447 | 8.028402812   | 5.720344215                                 | 3.310049825  |
|                | O448 | 5.342232800   | 4.965178485                                 | 0.386932512  |
|                | O449 | 2.026458327   | 6.973560877                                 | 0.903538844  |
|                | O450 | 1.274329274   | 4.706287252                                 | 3.390163426  |
|                | O451 | 3.693901538   | 10.370795489                                | 3.810363220  |
|                | O452 | 6.510073307   | 12.272109685                                | 1.470242435  |
|                | O453 | 7.674665247   | 9.401237982                                 | -0.129954296 |
|                | O454 | 4.350862506   | 14.189532214                                | -0.895476532 |
|                | O455 | 5.671901938   | 6.096388836                                 | -3.316708740 |
|                | O456 | 6.038432044   | -8.500043620                                | 0.756340392  |
|                | O457 | 7.045727429   | -4.649595189                                | -0.433118441 |
|                | O458 | 8.533609053   | -1.278215446                                | 2.817939537  |
|                | O459 | 8.228117793   | -2.750925872                                | 7.331862737  |
|                | O460 | 7.263517429   | -5.850104718                                | -5.369327573 |
|                | O461 | 2.417714476   | -7.702989192                                | -2.766730855 |
|                | O462 | 2.786504649   | -9.645436721                                | -1.739917692 |
|                | O463 | 8.553065968   | -1.350888850                                | -3.382513609 |
|                | O464 | -1.262279798  | -8.485785871                                | 8.123145435  |
|                | O465 | -3.799022554  | -9.792532331                                | 10.181141472 |
|                | O466 | -2.415906454  | -5.396610549                                | -1.967189805 |
|                | O467 | -4.131411964  | -6.804126046                                | -2.102244875 |
|                | O468 | -3.384522787  | -11.781663245                               | 1.539369179  |
|                | O469 | -2.419680063  | -11.320984987                               | -0.451377586 |
|                | O470 | -2.365676953  | -6.762839845                                | 3.297382207  |
|                | O471 | -4.426964451  | -7.346581101                                | 2.597623458  |
|                | O472 | -1.327502363  | -6.806314142                                | 0.880860869  |
|                | O473 | -5.544210399  | -6.997404956                                | 6.650449583  |
|                | O474 | -3.477538329  | -5.425025810                                | 5.528296748  |
|                | O475 | 5.188998766   | 3.564693304                                 | -2.793046214 |
|                | O476 | -4.500835451  | -11.566709217                               | 4.401523613  |
|                | O477 | -5.457253000  | -8.864515326                                | 4.571531563  |
|                | S478 | 4.028894388   | 2.169796058                                 | 4.830448751  |
|                | S479 | 3.256063921   | -0.731054799                                | 2.240974446  |
|                | S480 | 1.473437681   | -5.243092369                                | 1.226440404  |
|                | S481 | 0.545589140   | 0.675279891                                 | 3.781841411  |
|                | S482 | 0.622306801   | -1.652203966                                | 0.108516826  |
|                | S483 | 3.960914432   | -4.297259276                                | 3.822636003  |
|                | S484 | -1.826130017  | -3.881163877                                | 2.381152953  |
|                | S485 | 2.806817132   | -1.285927966                                | 5.835933946  |
|                | S486 | 0.458623845   | -5.586274370                                | 4.737261038  |
|                | S487 | -1.102280983  | -2.274770182                                | 5.789103296  |
| <b>3 (S=1)</b> |      |               | <b>bm22b2x6x2h2n0dthconextm_3_52994.018</b> |              |
| Fe(139) 2.243  | C1   | -2.646744953  | -2.726445972                                | -8.943644698 |
| Fe(140) -0.099 | C2   | -3.088492313  | -1.367926366                                | -8.388676606 |
| Fe(141) 2.228  | C3   | -3.347028480  | 1.032150123                                 | -8.859206284 |
| Fe(142) -2.714 | C4   | -4.765323006  | 1.261036125                                 | -8.337384038 |
| Fe(143) 3.184  | C5   | -7.135512040  | 0.686834992                                 | -8.483555595 |
| Fe(144) -2.413 | C6   | -7.373686174  | 0.156768746                                 | -7.065520605 |
| Fe(145) -0.831 | C7   | -6.668996461  | -1.450988702                                | -5.355717784 |
|                | C8   | -5.984075716  | -0.527292600                                | -4.344908018 |
|                | C9   | -4.109218683  | 0.937729402                                 | -3.833257288 |
|                | C10  | -4.906703842  | 2.213797536                                 | -3.528047992 |
|                | C11  | -6.402084047  | 3.948381501                                 | -4.339361084 |
|                | C12  | -7.706316449  | 3.706270535                                 | -3.566065308 |
|                | C13  | -9.811492789  | 2.461954746                                 | -3.460684811 |
|                | C14  | -9.920501642  | 1.618685632                                 | -2.184673833 |
|                | C15  | -9.031015103  | -0.281540852                                | -0.902483263 |
|                | C16  | -7.979152583  | -0.101448119                                | 0.192619754  |
|                | C17  | -5.875970628  | 1.017048194                                 | 0.839209188  |
|                | C18  | -5.898270007  | 2.429099190                                 | 1.445523869  |
|                | C19  | -4.511344782  | 0.650399111                                 | 0.191531017  |
|                | C20  | -3.329330228  | 1.013342364                                 | 1.098168681  |
|                | C21  | -4.473677084  | -0.835541561                                | -0.181915995 |
|                | C22  | -5.810981740  | 4.857908911                                 | 1.036355210  |
|                | C23  | -7.250726176  | 5.348455398                                 | 1.285080731  |
|                | C24  | -5.020592361  | 5.781064929                                 | 0.077659274  |
|                | C25  | -5.136080814  | 7.251036486                                 | 0.500030114  |
|                | C26  | -3.545856973  | 5.360554067                                 | 0.010464015  |
|                | C27  | -9.522172356  | 5.596212049                                 | 0.471066777  |
|                | C28  | -10.150075902 | 5.094059517                                 | 1.756697546  |
|                | C29  | -9.481732576  | -9.134565742                                | 2.825949698  |
|                | C30  | -8.278618249  | -8.646432606                                | 3.636249493  |
|                | C31  | -7.320266012  | -6.595239042                                | 4.705382610  |
|                | C32  | -7.940742820  | -6.206430081                                | 6.062495249  |
|                | C33  | -6.861586250  | -5.365700364                                | 3.902667268  |
|                | C34  | -5.834613998  | -4.486143404                                | 4.623007982  |
|                | C35  | -5.156326636  | -3.546387523                                | 3.625003100  |
|                | C36  | -4.076170343  | -1.375146451                                | 4.237542076  |

|      |              |              |              |
|------|--------------|--------------|--------------|
| C37  | -7.649219550 | -6.258906804 | 8.495320226  |
| C38  | -6.907692592 | -5.134515778 | 9.184728880  |
| C39  | 0.176615556  | -0.959448160 | -5.763749781 |
| C40  | 0.648658586  | 0.496292338  | -5.636872760 |
| C41  | 0.129043908  | -1.549617327 | -4.332511571 |
| C42  | -0.614864852 | -2.892254995 | -4.166239721 |
| C43  | 0.239806662  | -4.142228259 | -4.374609779 |
| C44  | 2.593497469  | 1.968869058  | -5.825108948 |
| C45  | 2.145382106  | 3.089100163  | -6.773623746 |
| C46  | 4.127205377  | 1.834385106  | -5.859452077 |
| C47  | 0.647422700  | 3.724786533  | -8.614291369 |
| C48  | -0.660274473 | 4.253495429  | -8.005887888 |
| C49  | -2.273213090 | 4.045623756  | -6.154413013 |
| C50  | -1.969218649 | 4.712591995  | -4.808511351 |
| C51  | -0.446027955 | 5.081325680  | -2.936296690 |
| C52  | -0.352325418 | 6.614798013  | -3.137451344 |
| C53  | 0.944385209  | 4.696867207  | -2.401453908 |
| C54  | 1.190322542  | 3.294531936  | -1.952013452 |
| C55  | 0.407311209  | 2.322703884  | -1.376580307 |
| C56  | 2.490345555  | 1.563613023  | -1.418536593 |
| C57  | 0.689441924  | 8.340872483  | -4.565580991 |
| C58  | -0.536926061 | 9.252054280  | -4.611350970 |
| C59  | 1.423819588  | 8.333585124  | -5.923071103 |
| C60  | 2.266476211  | 9.534095951  | -6.241470795 |
| C61  | 2.185529004  | 10.841130078 | -5.803187826 |
| C62  | 3.891034662  | 10.596289255 | -7.196791924 |
| C63  | -3.187479832 | 0.782440129  | 8.995780691  |
| C64  | -3.798873211 | -0.453751401 | 9.630437588  |
| C65  | -3.337922904 | 0.614582457  | 7.463106946  |
| C66  | -2.809049024 | 1.797113738  | 6.685678966  |
| C67  | -3.633793763 | 2.882838695  | 6.338280115  |
| C68  | -1.458528453 | 1.848982163  | 6.298528941  |
| C69  | -3.132863183 | 3.976677978  | 5.623414579  |
| C70  | -0.940695775 | 2.939332891  | 5.598960919  |
| C71  | -1.782046208 | 4.000844617  | 5.256075089  |
| C72  | 4.373045836  | 3.757675510  | 6.908383945  |
| C73  | 5.220025006  | 4.711347836  | 6.057712057  |
| C74  | 3.501004552  | 2.875769681  | 6.005454603  |
| C75  | 7.488098879  | 5.278495469  | 5.286548600  |
| C76  | 7.441658392  | 5.136016401  | 3.765742546  |
| C77  | 6.587186417  | 3.851202964  | 1.838093493  |
| C78  | 5.236443745  | 4.409770998  | 1.340499506  |
| C79  | 6.773613745  | 2.356078032  | 1.518993182  |
| C80  | 6.613201432  | 1.924108443  | 0.056704546  |
| C81  | 7.673641663  | 2.409764245  | -0.943530102 |
| C82  | 8.193991633  | 4.707898579  | -1.741356750 |
| C83  | 2.850767001  | 4.697579542  | 1.686830566  |
| C84  | 2.646176550  | 6.202661609  | 1.926095463  |
| C85  | 1.678689755  | 3.943736538  | 2.344937753  |
| C86  | 2.877552412  | 7.994327886  | 3.579189592  |
| C87  | 3.815967934  | 9.191799794  | 3.501606430  |
| C88  | 5.873871127  | 10.167436803 | 2.583010477  |
| C89  | 5.474984242  | 11.327746275 | 1.645193182  |
| C90  | 7.273437089  | 9.626978136  | 2.237294497  |
| C91  | 7.346923373  | 9.014978706  | 0.840432655  |
| C92  | 4.082235098  | 12.021453064 | -0.248449114 |
| C93  | 3.581604458  | 13.337691570 | 0.330033505  |
| C94  | 2.976540073  | 11.401521496 | -1.146852334 |
| C95  | 3.438972547  | 10.109952454 | -1.779494990 |
| C96  | 4.220847995  | 10.128028616 | -2.944381488 |
| C97  | 3.167241520  | 8.868465345  | -1.179521152 |
| C98  | 4.732528969  | 8.948577187  | -3.487189570 |
| C99  | 3.692801184  | 7.680628818  | -1.695127802 |
| C100 | 4.475123461  | 7.736741861  | -2.845351678 |
| C101 | 6.207875470  | -8.569053488 | 1.910031477  |
| C102 | 5.873647441  | -7.738218840 | 0.683798394  |
| C103 | 5.232445712  | -5.481512665 | -0.120067519 |
| C104 | 6.252109603  | -4.351367503 | -0.308777781 |
| C105 | 7.148957722  | -2.291378921 | 0.671910687  |
| C106 | 7.779531920  | -1.806944257 | 1.972886643  |
| C107 | 7.824989024  | -1.810756273 | 4.419070645  |
| C108 | 8.726282292  | -2.777699034 | 5.156549073  |
| C109 | 6.643601656  | -6.522595165 | -4.349786643 |
| C110 | 6.817277874  | -5.200239173 | -5.102694389 |
| C111 | 5.141874918  | -6.731410329 | -4.035117583 |
| C112 | 4.828493704  | -8.203094335 | -3.707041345 |
| C113 | 3.462586046  | -8.334778384 | -3.063945417 |
| C114 | 7.007453140  | -2.768352209 | -4.980002679 |
| C115 | 8.114602257  | -1.959334152 | -4.333876781 |
| C116 | 5.666359764  | -2.016763001 | -5.159848491 |



|       |               |               |               |
|-------|---------------|---------------|---------------|
| C117  | 4.921575519   | -1.923362935  | -3.856879899  |
| C118  | 5.276801257   | -0.964375059  | -2.893863120  |
| C119  | 3.960803115   | -2.894910969  | -3.524622419  |
| C120  | 4.741911063   | -1.037354902  | -1.604755575  |
| C121  | 3.419528313   | -2.957722745  | -2.237803793  |
| C122  | 3.838923910   | -2.047487027  | -1.263828387  |
| C123  | 0.615806452   | -9.661650112  | 5.512334227   |
| C124  | -0.386032363  | -9.617202519  | 6.678212648   |
| C125  | -0.060242273  | -9.491108165  | 4.141890001   |
| C126  | 0.864266083   | -9.342693281  | 2.973519661   |
| C127  | 1.664687432   | -10.317443256 | 2.412951648   |
| C128  | 1.792116488   | -8.469218118  | 1.200027075   |
| C129  | -2.527660959  | -10.292710424 | 7.616871073   |
| C130  | -1.929498907  | -10.816808272 | 8.904406675   |
| C131  | -3.268756767  | -6.010912145  | -1.283007315  |
| C132  | -3.393323023  | -6.128153581  | 0.210241096   |
| C133  | -2.445333026  | -7.221125183  | 0.853338003   |
| C134  | -2.748943352  | -8.614463644  | 0.235768481   |
| C135  | -2.005343900  | -9.749128005  | 0.957216812   |
| C136  | -2.433887431  | -11.125166539 | 0.533340574   |
| C137  | -2.838727162  | -7.290909088  | 2.360798573   |
| C138  | 1.476930367   | -2.821924244  | 3.110142519   |
| Fe139 | 2.221854550   | -4.630107515  | 2.848019816   |
| Fe140 | 1.020669630   | -0.898497247  | 2.190844411   |
| Fe141 | 1.230232048   | -1.719366023  | 4.663729794   |
| Fe142 | 3.385113457   | -2.453190856  | 3.466558492   |
| Fe143 | 3.210188737   | 0.109509460   | 4.088736133   |
| Fe144 | 0.039645068   | -3.889281845  | 3.997936395   |
| Fe145 | 0.391183553   | -3.502390172  | 1.385925163   |
| H146  | -3.177293107  | -3.826602509  | -7.307457796  |
| H147  | -1.568293272  | -3.550043610  | -7.412649761  |
| H148  | -2.652318808  | -0.486695756  | -10.192488205 |
| H149  | -1.750116952  | -2.583037904  | -9.566209592  |
| H150  | -3.442833402  | -3.055667442  | -9.634191282  |
| H151  | -2.668630196  | 1.348221181   | -8.053794401  |
| H152  | -5.526343880  | -0.084258303  | -9.692151939  |
| H153  | -3.182372285  | 1.692881877   | -9.721456512  |
| H154  | -7.779532941  | 0.138171705   | -9.183108884  |
| H155  | -5.895409837  | -1.237916247  | -7.332946482  |
| H156  | -7.438666436  | 1.741995958   | -8.486941796  |
| H157  | -3.899619208  | 0.462240684   | -2.866059065  |
| H158  | -4.360692452  | -0.262066176  | -5.604540779  |
| H159  | -6.175982214  | -2.432646691  | -5.349043316  |
| H160  | -5.819297224  | 4.681268600   | -3.767790930  |
| H161  | -5.529763161  | 2.353523084   | -5.496735404  |
| H162  | -7.704900407  | -1.581394990  | -5.020063867  |
| H163  | -3.149033355  | 1.206638588   | -4.296140556  |
| H164  | -8.185839265  | 2.116639500   | -4.805920264  |
| H165  | -6.646933184  | 4.382489710   | -5.318364530  |
| H166  | -5.292312788  | -1.104131171  | -0.864176763  |
| H167  | -3.522684925  | -1.079845761  | -0.680680983  |
| H168  | -4.542346991  | -1.470779933  | 0.715272801   |
| H169  | -4.424070093  | 1.246224019   | -0.731125923  |
| H170  | -10.418818912 | 1.967867400   | -4.233346488  |
| H171  | -3.421532235  | 4.344602664   | -0.390411157  |
| H172  | -7.898302284  | 4.711448362   | -0.595549452  |
| H173  | -6.178631650  | 7.598349459   | 0.511589138   |
| H174  | -2.381957989  | 0.789503559   | 0.584730351   |
| H175  | -3.334585293  | 0.423022696   | 2.025422964   |
| H176  | -3.805869333  | 1.649430335   | 9.301470634   |
| H177  | -2.988893578  | 6.053534117   | -0.637260646  |
| H178  | -4.573683060  | 7.883712095   | -0.201624008  |
| H179  | -3.087803035  | 5.391593979   | 1.012708819   |
| H180  | -4.717026267  | 7.402628246   | 1.507370336   |
| H181  | -5.460800259  | 5.676487980   | -0.931365174  |
| H182  | -5.335411816  | 4.880269398   | 2.028166141   |
| H183  | -5.612349525  | 3.286788831   | -0.417945204  |
| H184  | -3.317651256  | 2.079441653   | 1.370433639   |
| H185  | 1.885707416   | 2.859849327   | 2.323647623   |
| H186  | 0.780986672   | 4.139430455   | 1.740549966   |
| H187  | 0.575041023   | 4.702563819   | 3.797477764   |
| H188  | -1.904780045  | 5.712896230   | 4.343472791   |
| H189  | 0.102771511   | 2.944947997   | 5.282362393   |
| H190  | -0.797325833  | 1.005644732   | 6.512215590   |
| H191  | -4.692487884  | 2.870959576   | 6.611371273   |
| H192  | -6.982746407  | 1.236026335   | -0.985805348  |
| H193  | -8.927968176  | -1.310853039  | -1.277630151  |
| H194  | -10.016482626 | -0.192401462  | -0.426299958  |
| H195  | -8.269544482  | 0.480249557   | -2.736394757  |
| H196  | -10.270785124 | 3.432389140   | -3.232957364  |

|      |               |              |              |
|------|---------------|--------------|--------------|
| H197 | -3.794937130  | 4.798531595  | 5.337738726  |
| H198 | -6.056154018  | 0.342509694  | 1.685122668  |
| H199 | -9.585644322  | 6.695582616  | 0.443386432  |
| H200 | -10.122017667 | 5.201598483  | -0.363673027 |
| H201 | -9.727662366  | 4.135729045  | 2.140252344  |
| H202 | -7.593682826  | -7.168054421 | 9.113068120  |
| H203 | 0.517408595   | -6.036029223 | -3.659716566 |
| H204 | -4.640231654  | -7.357435369 | -1.436821027 |
| H205 | 4.826217149   | -8.789282622 | -4.637369058 |
| H206 | 5.597319385   | -8.618241297 | -3.039190881 |
| H207 | 4.528603858   | -6.421728006 | -4.896346173 |
| H208 | 8.909225338   | -2.578048637 | -3.854681783 |
| H209 | 6.937728014   | -7.285467931 | -5.086615073 |
| H210 | 1.159637783   | -1.645822198 | -3.954790175 |
| H211 | -1.461823434  | -2.950344926 | -4.872995437 |
| H212 | 6.831043742   | -4.122455713 | -3.323332829 |
| H213 | 7.396698173   | -2.984660676 | -5.995930958 |
| H214 | 7.300602500   | -6.007363799 | -2.449441835 |
| H215 | -0.739761901  | -5.141173808 | -2.824607824 |
| H216 | 4.862772064   | -6.075609559 | -3.195051429 |
| H217 | 7.541302319   | -7.582284121 | -2.839885343 |
| H218 | 0.722238119   | -1.738821188 | -7.600251181 |
| H219 | -0.376467224  | -0.809065912 | -3.695688943 |
| H220 | 4.368837209   | -8.323179034 | -1.324913819 |
| H221 | -1.062701282  | -2.924924509 | -3.162424327 |
| H222 | -1.225133271  | 4.911282450  | -2.179644860 |
| H223 | -0.654313451  | 2.299950612  | -1.157857123 |
| H224 | -2.798395787  | 4.795550570  | -6.758678985 |
| H225 | -0.594121798  | 2.794801172  | -6.535083877 |
| H226 | 0.444227499   | 6.254485822  | -4.991433765 |
| H227 | 1.511352027   | 11.340956996 | -5.115793761 |
| H228 | -1.440122151  | 8.772427531  | -5.061122565 |
| H229 | 0.690007612   | 8.156401675  | -6.730846064 |
| H230 | 1.359275267   | 8.691905948  | -3.764358450 |
| H231 | 4.759913577   | 10.861820751 | -7.794071924 |
| H232 | 1.134539918   | 5.370894868  | -1.548654438 |
| H233 | 1.691818195   | 4.952351273  | -3.167481903 |
| H234 | 3.456567983   | 12.484416925 | -6.312616893 |
| H235 | 2.096706433   | 7.460349825  | -5.927204744 |
| H236 | -0.297976332  | 3.534771223  | -4.436655872 |
| H237 | -2.977709056  | 3.215585668  | -5.994071770 |
| H238 | 1.300055778   | 4.591523098  | -8.777573761 |
| H239 | 3.345282878   | 0.908779382  | -1.295677251 |
| H240 | 0.422971040   | 3.282939155  | -9.594382981 |
| H241 | -1.709193022  | 1.195913985  | 10.350305615 |
| H242 | -1.316225339  | 1.591784040  | 8.813765506  |
| H243 | 4.201065883   | 3.560428493  | 2.945596570  |
| H244 | 2.788502923   | 4.555958297  | 0.597486374  |
| H245 | 3.813557684   | 6.105221716  | 3.610412843  |
| H246 | 3.353914874   | 3.287803557  | -2.303164151 |
| H247 | 4.882952103   | 3.578566946  | -3.816236777 |
| H248 | 4.726013438   | 4.929846888  | -3.019948308 |
| H249 | 4.444301624   | 1.070594292  | -5.136900608 |
| H250 | 4.459697058   | 1.529390252  | -6.865435357 |
| H251 | 7.579192804   | 8.911752121  | 3.014330220  |
| H252 | 7.966144569   | 10.480013896 | 2.261975824  |
| H253 | 7.671091705   | 7.090913707  | 1.633563451  |
| H254 | 7.535339161   | 7.217108053  | -0.114708867 |
| H255 | 10.127821454  | 5.372937954  | -1.613447363 |
| H256 | 7.788585738   | 1.670253956  | -1.751709751 |
| H257 | 5.329107141   | 8.974088618  | -4.402576196 |
| H258 | 2.525322315   | 8.805714843  | -0.295907198 |
| H259 | 6.742046526   | 6.045895275  | -2.316881870 |
| H260 | 6.052940607   | 1.777579202  | 2.119784881  |
| H261 | 6.283998316   | 3.439708561  | 3.919436934  |
| H262 | 5.610044151   | 2.180047260  | -0.319213510 |
| H263 | 1.141809220   | 1.753276998  | -7.926782600 |
| H264 | 8.510062311   | 5.041328686  | 5.612019966  |
| H265 | 2.378769396   | -0.151762271 | -6.403064624 |
| H266 | 7.777390604   | 2.065431649  | 1.867763675  |
| H267 | 3.518038447   | 6.733567497  | -1.183930730 |
| H268 | 4.208866022   | 3.785645228  | -5.906051390 |
| H269 | 7.308162939   | 6.341032331  | 5.502170756  |
| H270 | 9.945538993   | 3.652540141  | -1.496219039 |
| H271 | 8.356015751   | 6.535204819  | -2.629204773 |
| H272 | 1.174489358   | -2.681818989 | -6.289829001 |
| H273 | -0.862613614  | -0.902859389 | -6.137420594 |
| H274 | 4.426584544   | 11.079334284 | -3.440842862 |
| H275 | 2.309883503   | 2.334781884  | -4.825041332 |
| H276 | 7.349623185   | 4.450609681  | 1.323504533  |

|      |               |               |              |
|------|---------------|---------------|--------------|
| H277 | 8.644289441   | 2.484450372   | -0.434819934 |
| H278 | 6.675188875   | 0.827341266   | 0.056841543  |
| H279 | 6.377961073   | 3.823459823   | -1.908510867 |
| H280 | 1.939206734   | 8.296996941   | 3.089954526  |
| H281 | 5.076130454   | 8.183664905   | 2.237061011  |
| H282 | 5.925376650   | 10.625364883  | 3.581916476  |
| H283 | 2.662998244   | 7.829849582   | 4.644787649  |
| H284 | 4.082238126   | 10.137786151  | 0.759680249  |
| H285 | 6.698517038   | -7.939405456  | 2.667369944  |
| H286 | 5.231937815   | -8.884199817  | 2.334917866  |
| H287 | 1.295120595   | -8.813465975  | 5.678924294  |
| H288 | 7.072988227   | -10.379688960 | 2.284408249  |
| H289 | 6.690039092   | -10.135512477 | 0.710424816  |
| H290 | 2.983717153   | 2.139416185   | 6.633726646  |
| H291 | 2.982052234   | 5.190942516   | 7.312869835  |
| H292 | 6.909828477   | 3.642787425   | 6.532531427  |
| H293 | 2.754138535   | 3.495690042   | 5.490607406  |
| H294 | 4.078408022   | 5.003426053   | 8.512450179  |
| H295 | 6.984337238   | -1.515011468  | 5.065971722  |
| H296 | 5.042011258   | 3.112708742   | 7.499700506  |
| H297 | -7.747415969  | -4.768409136  | 3.629722629  |
| H298 | -6.464213626  | -7.261939382  | 4.863081607  |
| H299 | 6.539801584   | -2.966736270  | 3.173736837  |
| H300 | -2.900678104  | 0.219470978   | 4.725058826  |
| H301 | 7.962911398   | -2.478968149  | -0.040053764 |
| H302 | 2.680320049   | -3.719353143  | -1.982405175 |
| H303 | 6.577440007   | -1.432681937  | 0.283528043  |
| H304 | -5.892596530  | -2.899927447  | 3.127142882  |
| H305 | 5.569627555   | -3.564155689  | 1.446272033  |
| H306 | -4.670920390  | -4.140903956  | 2.834556618  |
| H307 | -6.424059116  | -5.749175341  | 2.966037989  |
| H308 | -5.056143601  | -5.104298428  | 5.094505345  |
| H309 | -6.317615229  | -3.896986959  | 5.419267201  |
| H310 | 5.070619805   | -2.562733633  | -5.905829828 |
| H311 | -9.174219201  | -6.859881254  | 3.641456998  |
| H312 | -9.101443044  | -9.333378322  | 1.812195707  |
| H313 | 3.467162358   | -2.112006568  | -0.242438569 |
| H314 | -11.249175470 | -8.317217682  | 3.501053850  |
| H315 | -11.082257209 | -8.258036741  | 1.871748504  |
| H316 | -3.208323936  | -3.181209581  | 4.385010033  |
| H317 | 5.048911665   | -0.319859898  | -0.841394182 |
| H318 | 3.642577328   | -3.616852468  | -4.280213887 |
| H319 | -4.036434498  | -11.114178138 | 4.373794115  |
| H320 | -0.704275606  | -10.368375019 | 3.955294318  |
| H321 | -4.328234550  | -8.714425985  | 3.976971557  |
| H322 | -3.376935644  | -12.026751138 | 3.314863519  |
| H323 | 9.110420502   | -3.628786981  | 4.543975868  |
| H324 | -2.459151877  | -6.274084057  | 4.764514019  |
| H325 | -4.432282130  | -6.349386406  | 0.499384299  |
| H326 | 5.597600346   | -6.082239104  | 1.870013041  |
| H327 | -3.834351730  | -8.794511409  | 0.293727859  |
| H328 | 2.860835130   | -10.207082443 | 0.639187330  |
| H329 | 2.075332449   | -7.796549738  | 0.398681397  |
| H330 | -9.773308042  | -10.109659630 | 3.251999099  |
| H331 | -2.067069009  | -1.308878556  | 4.691646429  |
| H332 | -3.907538453  | -6.974470002  | 6.531225137  |
| H333 | -1.975171046  | -5.372415643  | 5.934887397  |
| H334 | -6.238476728  | -6.936735519  | 7.016364345  |
| H335 | -6.112896654  | -1.078288923  | 4.117233501  |
| H336 | -2.596995404  | -12.253289562 | -0.976462766 |
| H337 | -0.926571834  | -9.640687660  | 0.768569621  |
| H338 | -2.163422154  | -9.696688082  | 2.040481043  |
| H339 | -2.449809578  | -8.601324642  | -0.822300415 |
| H340 | 4.252601638   | -5.068271607  | 0.168756822  |
| H341 | 6.012711532   | -0.197440131  | -3.144821728 |
| H342 | 5.900061923   | -1.023890189  | -5.574442992 |
| H343 | -3.087825764  | -5.168752502  | 0.648244516  |
| H344 | -4.600163867  | -8.310046708  | 6.131206423  |
| H345 | -5.646572886  | -9.398128447  | 4.445761021  |
| H346 | -5.172902095  | 0.364461114   | 4.020434917  |
| H347 | 1.857509977   | -11.342232565 | 2.709286752  |
| H348 | -0.721466332  | -8.616063829  | 4.176921976  |
| H349 | 5.137317668   | -6.017531517  | -1.067394081 |
| H350 | 8.420092829   | -0.906360438  | 4.207069163  |
| H351 | -4.406361079  | 0.465014376   | 7.245674639  |
| H352 | -2.799663850  | -0.300605216  | 7.169932548  |
| H353 | 1.920289470   | -10.927434628 | 6.465513579  |
| H354 | 0.807792912   | -11.712481233 | 5.558244842  |
| H355 | -3.341111928  | -10.979471208 | 7.333687529  |
| H356 | -1.843366816  | -10.696508337 | 5.639117479  |

|       |               |               |              |
|-------|---------------|---------------|--------------|
| H357  | -1.052330126  | -11.496251954 | 8.773524676  |
| H358  | -2.977062101  | -9.301609823  | 7.788611237  |
| H359  | -3.087987576  | -1.308288313  | 9.745978014  |
| H360  | 3.167001663   | 13.269351927  | 1.363037365  |
| H361  | -8.709195641  | -5.954380475  | 8.433523769  |
| H362  | -6.459839869  | -4.372976073  | 8.500952991  |
| H363  | 4.967094568   | 12.242941433  | -0.868287195 |
| H364  | 2.074311694   | 11.229218950  | -0.539205436 |
| H365  | 2.724898590   | 12.145242455  | -1.916478397 |
| H366  | -0.544336126  | -3.757007480  | 0.233445873  |
| H367  | 5.360813112   | 6.692001206   | -4.235557312 |
| H368  | -0.552850099  | -0.485652817  | 2.142396912  |
| H369  | -0.578912983  | -1.305426783  | 2.322897702  |
| H370  | 0.940970029   | 0.468034162   | 1.505135717  |
| H371  | -0.499550067  | -1.419671961  | -0.237096448 |
| H372  | 1.000546010   | 0.395806115   | -0.544342546 |
| Mo373 | -0.078750569  | -5.994895965  | 2.282360356  |
| N374  | -2.397484562  | -3.772264567  | -7.967857196 |
| N375  | -3.065317088  | -0.334915465  | -9.275360044 |
| N376  | -5.756519078  | 0.548735437   | -8.929523027 |
| N377  | -6.646207094  | -0.935166422  | -6.715627232 |
| N378  | -4.800191529  | 0.016627504   | -4.723964726 |
| N379  | -5.611657259  | 2.745984248   | -4.555544363 |
| N380  | -8.476132605  | 2.672998535   | -3.997895622 |
| N381  | -8.972681292  | 0.654025885   | -2.011967905 |
| N382  | -6.992286217  | 0.796970528   | -0.067999886 |
| N383  | -5.789073795  | 3.470080552   | 0.571827216  |
| N384  | -8.161864802  | 5.115778421   | 0.305153658  |
| N385  | -10.573696906 | -8.155947974  | 2.750900619  |
| N386  | -8.314376567  | -7.334978658  | 3.938346128  |
| N387  | -4.108041656  | -2.714807090  | 4.227758600  |
| N388  | -5.196925157  | -0.652711409  | 4.021919237  |
| N389  | -2.899970380  | -0.746906619  | 4.403084996  |
| N390  | -7.182507519  | -6.510603590  | 7.145609425  |
| N391  | 1.076327948   | -1.712466795  | -6.642077386 |
| N392  | -0.010017015  | -5.171709639  | -3.541492706 |
| N393  | 1.926141837   | 0.702561764   | -6.040571028 |
| N394  | 1.339722339   | 2.742932422   | -7.798671357 |
| N395  | -1.121674289  | 3.587980067   | -6.909375532 |
| N396  | -0.779572248  | 4.402490178   | -4.190396114 |
| N397  | 2.485553176   | 2.787677575   | -1.966332646 |
| N398  | 1.239996955   | 1.268909847   | -1.062452823 |
| N399  | 0.262500577   | 6.974725363   | -4.295385656 |
| N400  | 3.336548762   | 9.393861928   | -7.110765465 |
| N401  | 3.228598615   | 11.499940811  | -6.421682118 |
| N402  | -1.779486519  | 0.876297283   | 9.381008274  |
| N403  | 3.501572612   | 4.484216660   | 7.844340556  |
| N404  | 6.558749791   | 4.456237067   | 6.034676313  |
| N405  | 6.786934491   | 4.064088308   | 3.269651536  |
| N406  | 7.341850112   | 3.705721969   | -1.550563730 |
| N407  | 9.514193977   | 4.569986396   | -1.518286041 |
| N408  | 7.732764224   | 5.937913715   | -2.090567237 |
| N409  | 4.148889331   | 4.200735013   | 2.127875287  |
| N410  | 3.326130266   | 6.747974999   | 2.977303861  |
| N411  | 4.881524071   | 9.095819398   | 2.650177417  |
| N412  | 7.528914199   | 7.671811926   | 0.797884807  |
| N413  | 4.432212106   | 11.091432996  | 0.812218674  |
| N414  | 7.088600418   | -9.681466616  | 1.538039068  |
| N415  | 5.656967070   | -6.428239619  | 0.903779139  |
| N416  | 6.298689201   | -3.465396309  | 0.710347277  |
| N417  | 7.341615170   | -2.326007275  | 3.150586135  |
| N418  | 7.573052453   | -6.632582237  | -3.218107260 |
| N419  | 6.894639971   | -4.068355963  | -4.345510870 |
| N420  | 1.425653094   | -10.894597168 | 5.569233755  |
| N421  | 0.961770616   | -8.185369845  | 2.200854227  |
| N422  | 2.240680838   | -9.746196157  | 1.299328947  |
| N423  | -1.565585704  | -10.281652653 | 6.527492143  |
| O424  | -3.488059050  | -1.219234230  | -7.218514805 |
| O425  | -4.979185423  | 2.075119781   | -7.424947945 |
| O426  | -8.204214112  | 0.689220817   | -6.312316296 |
| O427  | -6.496011184  | -0.281786342  | -3.240759659 |
| O428  | -4.881580678  | 2.730688994   | -2.398784843 |
| O429  | -8.042535935  | 4.451849821   | -2.630863996 |
| O430  | -10.863255081 | 1.803681088   | -1.403323656 |
| O431  | -8.052608144  | -0.778231219  | 1.228383745  |
| O432  | -5.995897377  | 2.589027692   | 2.672511643  |
| O433  | -7.561887720  | 5.934116953   | 2.335758490  |
| O434  | -11.090952885 | 5.647886876   | 2.304053818  |
| O435  | -7.364952726  | -9.446058788  | 3.932390854  |
| O436  | -9.061565252  | -5.671147554  | 6.118508934  |

|  |              |              |                                       |              |
|--|--------------|--------------|---------------------------------------|--------------|
|  | O437         | -6.808087607 | -5.033481249                          | 10.397070944 |
|  | O438         | -0.080579244 | 1.409239702                           | -5.188401713 |
|  | O439         | 1.110155868  | -4.210707042                          | -5.271144827 |
|  | O440         | 2.520389871  | 4.258722574                           | -6.550491498 |
|  | O441         | 4.752743784  | 3.071897707                           | -5.485737613 |
|  | O442         | -1.228439567 | 5.221051698                           | -8.525672937 |
|  | O443         | -2.755225556 | 5.534728360                           | -4.333136449 |
|  | O444         | -0.679208706 | 7.413812575                           | -2.257399607 |
|  | O445         | -0.551099562 | 10.410507970                          | -4.232716089 |
|  | O446         | -4.969736006 | -0.540743543                          | 9.973215235  |
|  | O447         | -1.228101692 | 5.035257780                           | 4.524370259  |
|  | O448         | 4.725811660  | 5.670439302                           | 5.437367655  |
|  | O449         | 8.033379479  | 5.985700842                           | 3.067855344  |
|  | O450         | 5.176259597  | 5.024629230                           | 0.259946951  |
|  | O451         | 1.846944317  | 6.833049449                           | 1.218652315  |
|  | O452         | 1.485700572  | 4.362584069                           | 3.696588590  |
|  | O453         | 3.575957888  | 10.210139356                          | 4.160816302  |
|  | O454         | 6.070957551  | 12.413107618                          | 1.688061734  |
|  | O455         | 7.218906258  | 9.712930453                           | -0.178679269 |
|  | O456         | 3.581324913  | 14.383833055                          | -0.299406033 |
|  | O457         | 5.023369521  | 6.538622973                           | -3.332014865 |
|  | O458         | 5.787496229  | -8.279718861                          | -0.447726238 |
|  | O459         | 6.973012683  | -4.275981807                          | -1.327094071 |
|  | O460         | 8.645626130  | -0.918873860                          | 1.902864692  |
|  | O461         | 9.035750287  | -2.642929100                          | 6.330043014  |
|  | O462         | 6.840856559  | -5.168850922                          | -6.344895423 |
|  | O463         | 2.412453873  | -8.357967549                          | -3.694566947 |
|  | O464         | 3.441775865  | -8.380380009                          | -1.712229940 |
|  | O465         | 8.190322186  | -0.738722864                          | -4.356683947 |
|  | O466         | -0.097763507 | -9.074463425                          | 7.761320132  |
|  | O467         | -2.403108145 | -10.591708993                         | 10.008883385 |
|  | O468         | -2.507603649 | -5.259831834                          | -1.877748511 |
|  | O469         | -4.082710504 | -6.821280690                          | -2.032892549 |
|  | O470         | -2.862972793 | -12.001886258                         | 1.280505786  |
|  | O471         | -2.296377094 | -11.335862253                         | -0.802289516 |
|  | O472         | -1.897314851 | -6.996169402                          | 3.193661826  |
|  | O473         | -3.991797526 | -7.662498188                          | 2.687080983  |
|  | O474         | -1.119750603 | -6.879229714                          | 0.689184724  |
|  | O475         | -4.583619825 | -7.624283276                          | 6.851155673  |
|  | O476         | -2.765545294 | -5.837103064                          | 5.600724251  |
|  | O477         | 4.821500075  | 3.953502673                           | -2.892352421 |
|  | O478         | -3.636501964 | -12.012574852                         | 4.259556738  |
|  | O479         | -4.679078491 | -9.355547436                          | 4.661730192  |
|  | S480         | 4.469866687  | 1.972137683                           | 4.710417541  |
|  | S481         | 3.511690473  | -0.702989977                          | 2.031590173  |
|  | S482         | 1.603729037  | -5.219609591                          | 0.766641559  |
|  | S483         | 0.923048257  | 0.409226319                           | 4.051155524  |
|  | S484         | 0.792859451  | -1.752505570                          | 0.051424838  |
|  | S485         | 4.430054284  | -4.400903374                          | 3.214549576  |
|  | S486         | -1.507919341 | -4.052996584                          | 2.382427957  |
|  | S487         | 3.331568999  | -1.638083573                          | 5.543406653  |
|  | S488         | 1.061511014  | -5.837965263                          | 4.379295070  |
|  | S489         | -0.531801867 | -2.598845537                          | 5.717850700  |
|  | <b>4 S=1</b> |              | <b>bm22b2x6x2h2nconexdihbtb.car_6</b> |              |
|  | Fe(139)      | 2.313        | C1                                    | -2.546891901 |
|  | Fe(140)      | -0.038       | C2                                    | -2.775150919 |
|  | Fe(141)      | 2.140        | C3                                    | -2.582150463 |
|  | Fe(142)      | -2.721       | C4                                    | -3.991198461 |
|  | Fe(143)      | 3.191        | C5                                    | -6.396487155 |
|  | Fe(144)      | -2.354       | C6                                    | -6.854229224 |
|  | Fe(145)      | -0.942       | C7                                    | -6.592630858 |
|  |              |              | C8                                    | -5.888287519 |
|  |              |              | C9                                    | -3.897937564 |
|  |              |              | C10                                   | -4.534702970 |
|  |              |              | C11                                   | -5.611141436 |
|  |              |              | C12                                   | -6.995592582 |
|  |              |              | C13                                   | -9.243656600 |
|  |              |              | C14                                   | -9.545499908 |
|  |              |              | C15                                   | -9.031582013 |
|  |              |              | C16                                   | -8.031096228 |
|  |              |              | C17                                   | -5.826030395 |
|  |              |              | C18                                   | -5.685215084 |
|  |              |              | C19                                   | -4.488319382 |
|  |              |              | C20                                   | -3.317564158 |
|  |              |              | C21                                   | -4.632220490 |
|  |              |              | C22                                   | -5.245550978 |
|  |              |              | C23                                   | -6.621543269 |
|  |              |              | C24                                   | -4.284716172 |
|  |              |              | C25                                   | -4.214766564 |
|  |              |              |                                       | -3.967852605 |
|  |              |              |                                       | -2.488116756 |
|  |              |              |                                       | -0.171436125 |
|  |              |              |                                       | 0.332810238  |
|  |              |              |                                       | 0.081020168  |
|  |              |              |                                       | -0.195387549 |
|  |              |              |                                       | -1.618811244 |
|  |              |              |                                       | -0.666282199 |
|  |              |              |                                       | 0.631907529  |
|  |              |              |                                       | 2.030130151  |
|  |              |              |                                       | 3.795142093  |
|  |              |              |                                       | 3.866082727  |
|  |              |              |                                       | 2.914002261  |
|  |              |              |                                       | 2.380802133  |
|  |              |              |                                       | 0.682887734  |
|  |              |              |                                       | -1.608504466 |
|  |              |              |                                       | 0.915575393  |
|  |              |              |                                       | -0.473493156 |
|  |              |              |                                       | 1.834240928  |
|  |              |              |                                       | 0.160546583  |
|  |              |              |                                       | 3.332796615  |
|  |              |              |                                       | 0.476182599  |
|  |              |              |                                       | 1.172977171  |
|  |              |              |                                       | -0.275373521 |
|  |              |              |                                       | 1.571082893  |
|  |              |              |                                       | 0.631886996  |
|  |              |              |                                       | -0.351612783 |
|  |              |              |                                       | -0.338492186 |
|  |              |              |                                       | 5.594362969  |
|  |              |              |                                       | -0.403125268 |
|  |              |              |                                       | 6.290382616  |
|  |              |              |                                       | -0.383691617 |
|  |              |              |                                       | 6.194100108  |
|  |              |              |                                       | -1.456991175 |
|  |              |              |                                       | 7.720573121  |
|  |              |              |                                       | -1.335447303 |

|      |               |              |              |
|------|---------------|--------------|--------------|
| C26  | -2.884141681  | 5.581876593  | -1.328669603 |
| C27  | -8.777615879  | 6.624591025  | -1.451073861 |
| C28  | -9.570468918  | 6.479157286  | -0.167321558 |
| C29  | -10.719506719 | -7.378293695 | 3.718238794  |
| C30  | -9.504251986  | -6.863506474 | 4.492439331  |
| C31  | -8.344909229  | -4.753752812 | 5.176555663  |
| C32  | -8.998235778  | -4.035404839 | 6.374083441  |
| C33  | -7.684084557  | -3.765902267 | 4.199016011  |
| C34  | -6.616353970  | -2.873646239 | 4.839391211  |
| C35  | -5.774478655  | -2.189212936 | 3.761763260  |
| C36  | -4.476102337  | -0.080111282 | 4.130801510  |
| C37  | -8.857231897  | -3.613895093 | 8.784885257  |
| C38  | -7.994409942  | -2.487872772 | 9.311488997  |
| C39  | 0.429891152   | -2.124355101 | -5.610365636 |
| C40  | 1.053225793   | -0.722204437 | -5.669694039 |
| C41  | 0.206473602   | -2.446015657 | -4.110925589 |
| C42  | -0.688591477  | -3.662586351 | -3.793130741 |
| C43  | 0.052848785   | -4.990907410 | -3.665174085 |
| C44  | 3.157514736   | 0.507996681  | -5.853313321 |
| C45  | 2.876985975   | 1.558666788  | -6.935468634 |
| C46  | 4.668013403   | 0.211574663  | -5.780111063 |
| C47  | 1.594542225   | 2.143379878  | -8.940663440 |
| C48  | 0.358874162   | 2.917327649  | -8.452632594 |
| C49  | -1.373047552  | 3.114325042  | -6.715060685 |
| C50  | -1.030719044  | 3.989075030  | -5.504008826 |
| C51  | 0.561312389   | 4.570711791  | -3.732680826 |
| C52  | 0.819289302   | 6.017987310  | -4.209850924 |
| C53  | 1.899249393   | 4.107550798  | -3.131524100 |
| C54  | 1.879414280   | 2.914353523  | -2.231740305 |
| C55  | 0.932070101   | 2.390690240  | -1.384097226 |
| C56  | 2.815693510   | 1.287240432  | -1.026832557 |
| C57  | 2.029027565   | 7.346281446  | -5.889061701 |
| C58  | 0.902168243   | 8.354073569  | -6.116733700 |
| C59  | 2.774989519   | 7.051844171  | -7.210347514 |
| C60  | 3.781570471   | 8.076156437  | -7.648892265 |
| C61  | 3.794215462   | 9.450707808  | -7.513461582 |
| C62  | 5.610267827   | 8.762688943  | -8.580923397 |
| C63  | -3.396375279  | 2.553856465  | 8.731144450  |
| C64  | -4.122107498  | 1.488882170  | 9.532469545  |
| C65  | -3.456747481  | 2.116750916  | 7.245157283  |
| C66  | -2.831440596  | 3.121029266  | 6.305072664  |
| C67  | -3.596238841  | 4.126699292  | 5.683711611  |
| C68  | -1.453682855  | 3.079639555  | 6.024189592  |
| C69  | -3.015694796  | 5.046083851  | 4.803003487  |
| C70  | -0.858037310  | 3.997208638  | 5.159219860  |
| C71  | -1.641328589  | 4.974887641  | 4.540687821  |
| C72  | 4.321378863   | 4.427397895  | 6.510168606  |
| C73  | 5.344741304   | 5.114006639  | 5.596348046  |
| C74  | 3.368999838   | 3.554591497  | 5.680057444  |
| C75  | 7.705410812   | 5.228779511  | 4.906250318  |
| C76  | 7.717885205   | 4.830579579  | 3.430166008  |
| C77  | 6.776728617   | 3.356784802  | 1.686998193  |
| C78  | 5.558192188   | 4.002566280  | 0.989145163  |
| C79  | 6.760716021   | 1.816395112  | 1.640531589  |
| C80  | 6.678180961   | 1.150899678  | 0.262025498  |
| C81  | 7.900254943   | 1.286866855  | -0.659772217 |
| C82  | 8.843492760   | 3.348241146  | -1.693925006 |
| C83  | 3.257410270   | 4.792088271  | 1.122726063  |
| C84  | 3.312089116   | 6.331842721  | 1.118243678  |
| C85  | 1.934568938   | 4.368182011  | 1.786886231  |
| C86  | 3.773481898   | 8.299115239  | 2.493692794  |
| C87  | 4.860038788   | 9.334261194  | 2.229934806  |
| C88  | 7.059317910   | 9.840517945  | 1.258310425  |
| C89  | 6.851980093   | 10.819977284 | 0.081998408  |
| C90  | 8.381530603   | 9.060871744  | 1.113698055  |
| C91  | 8.400224755   | 8.162397337  | -0.118382214 |
| C92  | 5.645950714   | 11.249462655 | -2.014076166 |
| C93  | 5.279110626   | 12.698806145 | -1.720639280 |
| C94  | 4.511896391   | 10.578872250 | -2.835511255 |
| C95  | 4.857556739   | 9.153225057  | -3.199248322 |
| C96  | 5.664169532   | 8.877036606  | -4.313911720 |
| C97  | 4.449529391   | 8.076378812  | -2.394715629 |
| C98  | 6.068711355   | 7.573556945  | -4.611054142 |
| C99  | 4.873282215   | 6.769549811  | -2.655909636 |
| C100 | 5.684624009   | 6.532745500  | -3.763815859 |
| C101 | 4.807380992   | -8.778007681 | 3.937656103  |
| C102 | 4.680573351   | -8.211504661 | 2.534044975  |
| C103 | 4.519908651   | -6.119563922 | 1.203447375  |
| C104 | 5.731745524   | -5.233977352 | 0.888686207  |
| C105 | 6.944085675   | -3.203541697 | 1.529759650  |

|       |              |               |               |
|-------|--------------|---------------|---------------|
| C106  | 7.451354394  | -2.483960435  | 2.775648111   |
| C107  | 7.230599526  | -2.018665916  | 5.172427347   |
| C108  | 8.009355876  | -2.886795211  | 6.140481483   |
| C109  | 5.898314988  | -7.961030918  | -2.744784651  |
| C110  | 6.339645801  | -6.809197717  | -3.655170908  |
| C111  | 4.391031056  | -7.821296383  | -2.431772167  |
| C112  | 3.809437165  | -9.129659889  | -1.869936619  |
| C113  | 2.426495259  | -8.906501082  | -1.293818460  |
| C114  | 6.999958963  | -4.461154422  | -3.827446266  |
| C115  | 8.163431565  | -3.747212365  | -3.167046478  |
| C116  | 5.823868785  | -3.541829485  | -4.241531898  |
| C117  | 4.970714534  | -3.183830565  | -3.054654144  |
| C118  | 5.359453515  | -2.158781146  | -2.175701609  |
| C119  | 3.850421898  | -3.966648024  | -2.727999376  |
| C120  | 4.684473451  | -1.977558712  | -0.965310823  |
| C121  | 3.174634912  | -3.780487104  | -1.517786865  |
| C122  | 3.612295270  | -2.803095123  | -0.619456030  |
| C123  | -0.901050712 | -8.635030076  | 7.060240970   |
| C124  | -1.933593618 | -8.213581115  | 8.120006598   |
| C125  | -1.461061610 | -8.521720941  | 5.633601180   |
| C126  | -0.463825705 | -8.694753500  | 4.529043744   |
| C127  | 0.250646629  | -9.830298002  | 4.204876906   |
| C128  | 0.629520319  | -8.262221574  | 2.687769864   |
| C129  | -4.188955251 | -8.379353767  | 9.016725454   |
| C130  | -3.718111898 | -8.684636683  | 10.421845757  |
| C131  | -3.915585721 | -5.818585145  | -0.530995103  |
| C132  | -4.171486216 | -5.625578289  | 0.937771786   |
| C133  | -3.409165328 | -6.668755029  | 1.852550403   |
| C134  | -3.859634575 | -8.111928019  | 1.488225257   |
| C135  | -3.278420957 | -9.164196548  | 2.446354298   |
| C136  | -3.877435772 | -10.530994047 | 2.273316706   |
| C137  | -3.877262564 | -6.399875142  | 3.317409204   |
| C138  | 0.886776639  | -2.350045993  | 3.535448768   |
| Fe139 | 1.448475802  | -4.248771608  | 3.631550322   |
| Fe140 | 0.681072551  | -0.567554175  | 2.309290710   |
| Fe141 | 0.687503338  | -1.006363169  | 4.893159961   |
| Fe142 | 2.801627948  | -2.091183698  | 3.918703377   |
| Fe143 | 2.818451432  | 0.558130712   | 4.155774006   |
| Fe144 | -0.690363257 | -3.119164904  | 4.504538737   |
| Fe145 | -0.205132861 | -3.233511765  | 1.895720944   |
| H146  | -3.207742491 | -4.685258248  | -6.832210931  |
| H147  | -1.576567413 | -4.683990464  | -6.972827705  |
| H148  | -2.014796687 | -1.955174198  | -10.139242166 |
| H149  | -1.654477418 | -4.073975667  | -9.261695031  |
| H150  | -3.402084716 | -4.280412763  | -9.251228680  |
| H151  | -1.950290137 | 0.161020873   | -8.271701535  |
| H152  | -4.818044536 | -1.078324795  | -10.045836148 |
| H153  | -2.228492419 | 0.322176969   | -10.022899225 |
| H154  | -7.046691725 | -0.469333546  | -9.843292721  |
| H155  | -5.581861734 | -1.799538276  | -7.607006221  |
| H156  | -6.530331935 | 1.155230992   | -9.330971712  |
| H157  | -3.875071901 | 0.300532741   | -3.198624735  |
| H158  | -4.134049460 | -0.773849266  | -5.861428214  |
| H159  | -6.262690577 | -2.648675373  | -5.543498924  |
| H160  | -4.979214251 | 4.542752550   | -5.020961964  |
| H161  | -4.848234643 | 1.937747479   | -6.295904212  |
| H162  | -7.667297507 | -1.553949989  | -5.527887390  |
| H163  | -2.861655815 | 0.697609556   | -4.604124956  |
| H164  | -7.588738950 | 2.132487647   | -5.826020216  |
| H165  | -5.709243485 | 4.068629592   | -6.578152161  |
| H166  | -5.447229951 | -0.658919241  | -1.009322490  |
| H167  | -3.699215338 | -0.808375098  | -0.704700805  |
| H168  | -4.829979809 | -0.770447322  | 0.661272002   |
| H169  | -4.268270636 | 1.544970108   | -1.288426433  |
| H170  | -9.854946153 | 2.338356779   | -5.428413004  |
| H171  | -2.888622773 | 4.495584221   | -1.497030440  |
| H172  | -7.208067012 | 5.379132540   | -2.168316128  |
| H173  | -5.194423027 | 8.195446442   | -1.488871103  |
| H174  | -2.387406831 | 1.118684016   | 0.254662049   |
| H175  | -3.456410986 | 1.207798453   | 1.660364519   |
| H176  | -3.972581214 | 3.493577915   | 8.829306032   |
| H177  | -2.211856106 | 6.035431749   | -2.071482913  |
| H178  | -3.522278552 | 8.123503243   | -2.088505452  |
| H179  | -2.467050543 | 5.776148148   | -0.326835287  |
| H180  | -3.845744296 | 8.019880913   | -0.341910984  |
| H181  | -4.683519421 | 5.949256254   | -2.458218027  |
| H182  | -4.830246999 | 5.772152938   | 0.599851362   |
| H183  | -5.196049971 | 3.741316019   | -1.493182456  |
| H184  | -3.165737870 | 2.660283398   | 0.671340283   |
| H185  | 1.947237058  | 3.276734054   | 1.957174995   |

|      |               |              |              |
|------|---------------|--------------|--------------|
| H186 | 1.123553637   | 4.604520135  | 1.080922885  |
| H187 | 0.804724764   | 5.310303321  | 3.098258216  |
| H188 | -1.656557784  | 6.426483045  | 3.249889165  |
| H189 | 0.205546210   | 3.926139288  | 4.929397606  |
| H190 | -0.836319998  | 2.288740785  | 6.455956265  |
| H191 | -4.671997547  | 4.183945531  | 5.871775763  |
| H192 | -6.752425312  | 1.836902780  | -1.775307976 |
| H193 | -9.075906017  | -0.404713904 | -1.773859953 |
| H194 | -10.012999655 | 1.010377023  | -1.242270765 |
| H195 | -8.071127197  | 0.929613034  | -3.488229374 |
| H196 | -9.589100410  | 3.955265166  | -4.731009666 |
| H197 | -3.632705846  | 5.802978241  | 4.310189122  |
| H198 | -6.162563657  | 1.375771603  | 1.099350818  |
| H199 | -8.695787587  | 7.695617617  | -1.699638484 |
| H200 | -9.358264681  | 6.135529910  | -2.249129223 |
| H201 | -9.298961280  | 5.596887115  | 0.458445648  |
| H202 | -8.979576804  | -4.376473519 | 9.568055901  |
| H203 | 0.100892311   | -6.709560819 | -2.552848271 |
| H204 | -5.483853901  | -6.942549921 | -0.588778452 |
| H205 | 3.721941892   | -9.864433306 | -2.684102637 |
| H206 | 4.478595652   | -9.545609640 | -1.102942081 |
| H207 | 3.840459756   | -7.548452570 | -3.344989894 |
| H208 | 8.792899096   | -4.399910233 | -2.515890141 |
| H209 | 6.026965173   | -8.852737940 | -3.376317224 |
| H210 | 1.191386258   | -2.572698692 | -3.632811411 |
| H211 | -1.454788639  | -3.788625407 | -4.577199724 |
| H212 | 6.506162230   | -5.528024364 | -2.031541864 |
| H213 | 7.436788946   | -4.872387605 | -4.761353852 |
| H214 | 6.629470122   | -7.386000464 | -0.890230441 |
| H215 | -1.122868132  | -5.562367563 | -2.039091911 |
| H216 | 4.251993437   | -6.992055584 | -1.721000116 |
| H217 | 6.624825613   | -9.013883468 | -1.139084810 |
| H218 | 1.014218680   | -3.280008860 | -7.225251907 |
| H219 | -0.257166904  | -1.560215300 | -3.654362930 |
| H220 | 3.238322994   | -8.911971424 | 0.498396554  |
| H221 | -1.240601711  | -3.465353266 | -2.863232527 |
| H222 | -0.222106843  | 4.635732027  | -2.964535876 |
| H223 | -0.110204741  | 2.651954548  | -1.232781099 |
| H224 | -1.834365418  | 3.778088829  | -7.456708987 |
| H225 | 0.121320046   | 1.605214269  | -6.857558536 |
| H226 | 1.596966929   | 5.248158239  | -5.947001995 |
| H227 | 3.104014456   | 10.145537742 | -7.047762896 |
| H228 | -0.051372290  | 7.889856118  | -6.465934509 |
| H229 | 2.037469744   | 6.864746116  | -8.012273116 |
| H230 | 2.724990966   | 7.762564495  | -5.143514443 |
| H231 | 6.565215603   | 8.815092866  | -9.098647901 |
| H232 | 2.287863808   | 4.959100750  | -2.547393650 |
| H233 | 2.618627271   | 3.942977312  | -3.949920866 |
| H234 | 5.289238549   | 10.828791909 | -8.180666197 |
| H235 | 3.324985768   | 6.107125691  | -7.071988158 |
| H236 | 0.596187680   | 2.815383293  | -4.986204215 |
| H237 | -2.136074793  | 2.382093803  | -6.415937767 |
| H238 | 2.363216005   | 2.888322986  | -9.181241163 |
| H239 | 3.526357247   | 0.581767839  | -0.613717256 |
| H240 | 1.328064104   | 1.620315379  | -9.868596804 |
| H241 | -1.983985510  | 3.128944509  | 10.097710477 |
| H242 | -1.467679845  | 3.217620136  | 8.550588511  |
| H243 | 4.331888437   | 3.682666450  | 2.645270416  |
| H244 | 3.223664531   | 4.491596057  | 0.065648177  |
| H245 | 4.381630252   | 6.317837866  | 2.868439105  |
| H246 | 3.983899845   | 2.406852358  | -2.416591443 |
| H247 | 5.561158327   | 2.222674895  | -3.997058523 |
| H248 | 5.581928690   | 3.723877151  | -3.491684664 |
| H249 | 4.863595600   | -0.471269361 | -4.942205128 |
| H250 | 5.004443009   | -0.265632849 | -6.715857938 |
| H251 | 8.551965626   | 8.489830717  | 2.038047110  |
| H252 | 9.190589061   | 9.796000385  | 1.005207675  |
| H253 | 8.292674010   | 6.416855175  | 1.060783480  |
| H254 | 8.241081113   | 6.203191230  | -0.677516383 |
| H255 | 10.800804158  | 3.834780423  | -1.321187843 |
| H256 | 7.963732375   | 0.408539955  | -1.321340663 |
| H257 | 6.684733690   | 7.374405730  | -5.491191400 |
| H258 | 3.782021124   | 8.237209354  | -1.543743373 |
| H259 | 7.685284549   | 4.694686352  | -2.733797340 |
| H260 | 5.909295127   | 1.454506592  | 2.238979605  |
| H261 | 6.308841980   | 3.368980821  | 3.777093605  |
| H262 | 5.777945258   | 1.478709508  | -0.279384741 |
| H263 | 1.826791028   | 0.209955574  | -8.036321606 |
| H264 | 8.663658804   | 4.918501720  | 5.344837240  |
| H265 | 2.766890034   | -1.641006077 | -6.160008248 |



|      |               |               |              |
|------|---------------|---------------|--------------|
| H266 | 7.672546082   | 1.464996537   | 2.149946084  |
| H267 | 4.607384162   | 5.955860905   | -1.978549897 |
| H268 | 4.975144093   | 2.118853230   | -6.079311621 |
| H269 | 7.664011353   | 6.326915824   | 4.930484326  |
| H270 | 10.379985384  | 2.196040163   | -0.944276412 |
| H271 | 9.380076979   | 4.961091448   | -2.817322272 |
| H272 | 1.265766698   | -4.000420049  | -5.734846999 |
| H273 | -0.564077654  | -2.026848665  | -6.085851860 |
| H274 | 5.985567959   | 9.692203948   | -4.966329218 |
| H275 | 2.865757963   | 1.002902868   | -4.911162847 |
| H276 | 7.647418733   | 3.741007170   | 1.141078698  |
| H277 | 8.814464454   | 1.302401257   | -0.052227626 |
| H278 | 6.554488368   | 0.076438366   | 0.453325974  |
| H279 | 6.974200308   | 2.643093803   | -2.037206288 |
| H280 | 2.875895076   | 8.642483030   | 1.958290761  |
| H281 | 6.011928721   | 7.945470437   | 1.253125148  |
| H282 | 7.139698661   | 10.485270519  | 2.146261791  |
| H283 | 3.558967902   | 8.335700253   | 3.571406409  |
| H284 | 5.371534513   | 9.626952907   | -0.648061268 |
| H285 | 5.308565144   | -8.050473122  | 4.592625279  |
| H286 | 3.768835264   | -8.887016369  | 4.313024420  |
| H287 | -0.068474786  | -7.924916397  | 7.173082910  |
| H288 | 5.470226570   | -10.494051399 | 4.815652023  |
| H289 | 5.150040907   | -10.649781506 | 3.216992280  |
| H290 | 2.719092895   | 3.003009246   | 6.370710961  |
| H291 | 3.148811955   | 6.092218336   | 6.621231498  |
| H292 | 6.833787999   | 3.911401814   | 6.346327296  |
| H293 | 2.752337744   | 4.195612431   | 5.035298656  |
| H294 | 4.137006511   | 5.915623840   | 7.913549601  |
| H295 | 6.345638013   | -1.606925805  | 5.681246740  |
| H296 | 4.853784947   | 3.784866760   | 7.228909058  |
| H297 | -8.466814811  | -3.145668442  | 3.731320553  |
| H298 | -7.589195811  | -5.462421666  | 5.534792105  |
| H299 | 5.977265729   | -3.278875325  | 4.007543080  |
| H300 | -3.133628604  | 1.419142309   | 4.487356984  |
| H301 | 7.800067768   | -3.723993441  | 1.080000524  |
| H302 | 2.308797343   | -4.397048452  | -1.264126394 |
| H303 | 6.653310129   | -2.414455262  | 0.817145827  |
| H304 | -6.392258473  | -1.552939941  | 3.113438798  |
| H305 | 5.068190906   | -3.955797508  | 2.331422975  |
| H306 | -5.317818330  | -2.950841489  | 3.109660936  |
| H307 | -7.225287890  | -4.374982172  | 3.402959756  |
| H308 | -5.938277458  | -3.474812184  | 5.462986620  |
| H309 | -7.079600523  | -2.113267858  | 5.489962040  |
| H310 | 5.228648156   | -4.072747780  | -4.998319101 |
| H311 | -10.139864801 | -5.029700632  | 4.019205504  |
| H312 | -10.323020619 | -7.842905025  | 2.802138069  |
| H313 | 3.118220743   | -2.667036028  | 0.340962057  |
| H314 | -12.370265549 | -6.202818089  | 4.083905434  |
| H315 | -12.173739943 | -6.579655231  | 2.501481323  |
| H316 | -3.850301885  | -1.923994877  | 4.624133952  |
| H317 | 4.998640175   | -1.199955679  | -0.267210786 |
| H318 | 3.511429348   | -4.738673726  | -3.423167848 |
| H319 | -5.636296759  | -9.596922363  | 5.953733064  |
| H320 | -2.256007650  | -9.277906156  | 5.504793896  |
| H321 | -5.611601259  | -7.308720707  | 5.080248342  |
| H322 | -5.034295731  | -10.763630130 | 5.141436809  |
| H323 | 8.371306065   | -3.857057001  | 5.720955652  |
| H324 | -3.497127835  | -5.002263513  | 5.521107071  |
| H325 | -5.247594917  | -5.671330110  | 1.163346228  |
| H326 | 4.681476388   | -6.308557753  | 3.300255150  |
| H327 | -4.959787969  | -8.153301754  | 1.526532241  |
| H328 | 1.524509618   | -10.169826166 | 2.515509138  |
| H329 | 1.014368013   | -7.784742187  | 1.794882998  |
| H330 | -11.153017865 | -8.193178124  | 4.323048213  |
| H331 | -2.499035523  | -0.190402147  | 4.682521870  |
| H332 | -5.119511682  | -5.149253874  | 7.278622996  |
| H333 | -2.966272776  | -3.949653813  | 6.536011528  |
| H334 | -7.465105577  | -4.743362661  | 7.589178259  |
| H335 | -6.452369459  | 0.422269740   | 3.853309054  |
| H336 | -4.142612704  | -11.906410476 | 1.000913624  |
| H337 | -2.191551598  | -9.225814057  | 2.287667435  |
| H338 | -3.450191199  | -8.878131552  | 3.490418233  |
| H339 | -3.538291851  | -8.338543370  | 0.461386432  |
| H340 | 3.607478050   | -5.507847092  | 1.285752818  |
| H341 | 6.220977800   | -1.535508938  | -2.428515454 |
| H342 | 6.262740897   | -2.649351783  | -4.713914854 |
| H343 | -3.782474249  | -4.638253614  | 1.218838543  |
| H344 | -5.947065219  | -6.451425561  | 7.097061475  |
| H345 | -7.025925942  | -7.725963339  | 5.587295140  |

|       |               |               |              |
|-------|---------------|---------------|--------------|
| H346  | -5.338722065  | 1.710869600   | 3.572179051  |
| H347  | 0.313599453   | -10.795518272 | 4.693645173  |
| H348  | -1.939311012  | -7.541713108  | 5.512766233  |
| H349  | 4.402093234   | -6.836553815  | 0.388263462  |
| H350  | 7.877190769   | -1.174332282  | 4.881053750  |
| H351  | -4.516093930  | 1.965982667   | 6.984701533  |
| H352  | -2.943431923  | 1.145107476   | 7.154360482  |
| H353  | 0.060079477   | -9.993732928  | 8.259925448  |
| H354  | -1.144545834  | -10.656831501 | 7.377144615  |
| H355  | -5.078466811  | -9.002155721  | 8.831324255  |
| H356  | -3.490519609  | -9.293545449  | 7.224080447  |
| H357  | -2.939431844  | -9.482097139  | 10.493142794 |
| H358  | -4.502568374  | -7.325435155  | 8.949631657  |
| H359  | -3.487475623  | 0.613716525   | 9.813510166  |
| H360  | 4.807766883   | 12.871487447  | -0.724973552 |
| H361  | -9.851436979  | -3.185598790  | 8.569337576  |
| H362  | -7.374219536  | -1.966890713  | 8.542673735  |
| H363  | 6.571319107   | 11.252940842  | -2.613454754 |
| H364  | 3.579461025   | 10.609122060  | -2.251027453 |
| H365  | 4.357190323   | 11.185607542  | -3.739003323 |
| H366  | -1.100817046  | -3.522453637  | 0.719443646  |
| H367  | 6.549819481   | 5.178757621   | -4.868296250 |
| H368  | -0.893841626  | -0.133512779  | 2.107415033  |
| H369  | -0.951111439  | -0.893162378  | 2.444524512  |
| H370  | 0.615555228   | 0.701369432   | 1.419671134  |
| H371  | -0.580293233  | -1.370124230  | -0.193153245 |
| H372  | 1.119789930   | 0.882333293   | 0.205392063  |
| Mo373 | -0.974819228  | -5.467387760  | 3.189269085  |
| N374  | -2.441660719  | -4.864401145  | -7.486841958 |
| N375  | -2.479988573  | -1.610874723  | -9.303065139 |
| N376  | -5.018985619  | -0.312356929  | -9.407294798 |
| N377  | -6.338290923  | -1.308588327  | -7.134259899 |
| N378  | -4.611108434  | -0.326767647  | -5.075673131 |
| N379  | -4.991930572  | 2.481909165   | -5.441251086 |
| N380  | -7.858213038  | 2.861001543   | -5.159992707 |
| N381  | -8.760655211  | 1.360034270   | -2.865194038 |
| N382  | -6.894367669  | 1.585280921   | -0.798946068 |
| N383  | -5.380780407  | 4.147609046   | -0.573128048 |
| N384  | -7.485073875  | 5.968377529   | -1.380349664 |
| N385  | -11.668511039 | -6.320663571  | 3.349915336  |
| N386  | -9.369629267  | -5.523330429  | 4.482943655  |
| N387  | -4.670883630  | -1.393219198  | 4.313772240  |
| N388  | -5.489633218  | 0.717456692   | 3.727191457  |
| N389  | -3.241407191  | 0.426344300   | 4.285018188  |
| N390  | -8.350947226  | -4.193855164  | 7.555414912  |
| N391  | 1.300068038   | -3.108188059  | -6.259354536 |
| N392  | -0.354520959  | -5.803266153  | -2.669051722 |
| N393  | 2.373108961   | -0.703808718  | -5.984493505 |
| N394  | 2.124567237   | 1.181829642   | -7.990677148 |
| N395  | -0.255567602  | 2.429064700   | -7.338540591 |
| N396  | 0.135469476   | 3.712201372   | -4.836698672 |
| N397  | 3.047969628   | 2.200810518   | -1.986537586 |
| N398  | 1.537750129   | 1.384611694   | -0.662122775 |
| N399  | 1.463757765   | 6.097733400   | -5.403630103 |
| N400  | 4.921362090   | 7.658697608   | -8.317477560 |
| N401  | 4.966576034   | 9.867309418   | -8.109791587 |
| N402  | -2.011631962  | 2.641515558   | 9.198560867  |
| N403  | 3.525766067   | 5.398590615   | 7.275159674  |
| N404  | 6.629914334   | 4.673297798   | 5.704916826  |
| N405  | 6.930311770   | 3.794005200   | 3.071758936  |
| N406  | 7.849440531   | 2.486976297   | -1.503667827 |
| N407  | 10.083699433  | 3.123813132   | -1.224123210 |
| N408  | 8.604497531   | 4.533153772   | -2.316574369 |
| N409  | 4.425956196   | 4.158436149   | 1.725589525  |
| N410  | 4.043561499   | 6.920423867   | 2.110896387  |
| N411  | 5.930976370   | 8.937629571   | 1.478229150  |
| N412  | 8.250096154   | 6.834263049   | 0.123297709  |
| N413  | 5.848669446   | 10.515856429  | -0.775190494 |
| N414  | 5.573997210   | -10.027668871 | 3.911539138  |
| N415  | 4.705930906   | -6.867800857  | 2.440736260  |
| N416  | 5.865350527   | -4.159246756  | 1.693020476  |
| N417  | 6.839889818   | -2.724104593  | 3.965169384  |
| N418  | 6.797873822   | -8.115051409  | -1.594161429 |
| N419  | 6.618260226   | -5.622917993  | -3.046098566 |
| N420  | -0.371452594  | -9.985400990  | 7.331536608  |
| N421  | -0.205751354  | -7.717626136  | 3.567631097  |
| N422  | 0.932104671   | -9.535869526  | 3.043883840  |
| N423  | -3.191078381  | -8.729622469  | 8.019868432  |
| O424  | -3.252562711  | -2.109550685  | -7.218917284 |
| O425  | -4.163582416  | 1.299385046   | -8.040864464 |

|                |      |               |                                          |              |
|----------------|------|---------------|------------------------------------------|--------------|
|                | O426 | -7.671902393  | 0.548696995                              | -7.148513250 |
|                | O427 | -6.463514186  | -0.221865780                             | -3.759744777 |
|                | O428 | -4.607691194  | 2.710885146                              | -3.212676841 |
|                | O429 | -7.306557127  | 4.816488920                              | -4.119537182 |
|                | O430 | -10.494238513 | 2.851778507                              | -2.670420696 |
|                | O431 | -8.281321155  | 0.476235690                              | 0.658931412  |
|                | O432 | -5.833295679  | 3.751912655                              | 1.635956740  |
|                | O433 | -6.925907109  | 7.105067665                              | 0.503832612  |
|                | O434 | -10.487523346 | 7.226319093                              | 0.139731105  |
|                | O435 | -8.730746973  | -7.675403151                             | 5.043517488  |
|                | O436 | -10.044835882 | -3.378927745                             | 6.230181525  |
|                | O437 | -7.972789939  | -2.147582604                             | 10.483430789 |
|                | O438 | 0.401565939   | 0.317151062                              | -5.426601431 |
|                | O439 | 0.977626018   | -5.308436893                             | -4.446195008 |
|                | O440 | 3.328150319   | 2.714797015                              | -6.791152264 |
|                | O441 | 5.416880842   | 1.414317392                              | -5.543618698 |
|                | O442 | -0.027351220  | 3.908015936                              | -9.083672387 |
|                | O443 | -1.768920698  | 4.922134029                              | -5.178888561 |
|                | O444 | 0.576245910   | 6.996403069                              | -3.500984942 |
|                | O445 | 1.012362195   | 9.559594360                              | -5.974754740 |
|                | O446 | -5.303943350  | 1.547791073                              | 9.840729255  |
|                | O447 | -1.004586876  | 5.828733726                              | 3.659636698  |
|                | O448 | 5.030706142   | 6.028058479                              | 4.811178589  |
|                | O449 | 8.463729684   | 5.452738164                              | 2.645913776  |
|                | O450 | 5.647367441   | 4.360332636                              | -0.199381122 |
|                | O451 | 2.665162776   | 6.964447512                              | 0.273109906  |
|                | O452 | 1.748861347   | 5.066455077                              | 3.020376675  |
|                | O453 | 4.733332317   | 10.487216963                             | 2.660716857  |
|                | O454 | 7.562360072   | 11.827656773                             | -0.038900428 |
|                | O455 | 8.495176923   | 8.631735604                              | -1.263427651 |
|                | O456 | 5.436620074   | 13.603207490                             | -2.525222768 |
|                | O457 | 6.131517687   | 5.220056151                              | -3.986613573 |
|                | O458 | 4.533374257   | -8.981021029                             | 1.550783748  |
|                | O459 | 6.529989009   | -5.512201649                             | -0.032670871 |
|                | O460 | 8.400709377   | -1.693018339                             | 2.643133638  |
|                | O461 | 8.238508324   | -2.562024477                             | 7.294164590  |
|                | O462 | 6.407139532   | -6.953208785                             | -4.887555223 |
|                | O463 | 1.422396522   | -8.760389713                             | -1.982442062 |
|                | O464 | 2.338902044   | -8.838119781                             | 0.051738345  |
|                | O465 | 8.453898260   | -2.573616067                             | -3.352373861 |
|                | O466 | -1.620847642  | -7.486179371                             | 9.080632333  |
|                | O467 | -4.193569125  | -8.167018813                             | 11.422267391 |
|                | O468 | -2.991567531  | -5.326980091                             | -1.162606825 |
|                | O469 | -4.800115281  | -6.621607456                             | -1.207592515 |
|                | O470 | -4.459759368  | -11.173393208                            | 3.144433387  |
|                | O471 | -3.715488306  | -11.023360441                            | 1.017095333  |
|                | O472 | -2.941652265  | -6.072248452                             | 4.145880912  |
|                | O473 | -5.082406222  | -6.553229985                             | 3.628155624  |
|                | O474 | -2.044287203  | -6.517852867                             | 1.724844933  |
|                | O475 | -5.889783679  | -5.638147829                             | 7.665184423  |
|                | O476 | -3.789211473  | -4.381422957                             | 6.237585643  |
|                | O477 | 5.541831989   | 2.788448344                              | -3.176394196 |
|                | O478 | -5.330010573  | -10.534296016                            | 6.046625670  |
|                | O479 | -6.068599123  | -7.760620322                             | 5.846408231  |
|                | S480 | 4.254230203   | 2.345409747                              | 4.595628059  |
|                | S481 | 3.150640313   | -0.576716637                             | 2.256990531  |
|                | S482 | 0.835608711   | -5.151573331                             | 1.663442435  |
|                | S483 | 0.568935066   | 1.015381173                              | 3.963268026  |
|                | S484 | 0.582594793   | -1.812038729                             | 0.364846697  |
|                | S485 | 3.653875412   | -4.145289489                             | 4.054412119  |
|                | S486 | -2.179091811  | -3.404650226                             | 2.857734517  |
|                | S487 | 2.747400997   | -0.960433805                             | 5.845032267  |
|                | S488 | 0.108533646   | -5.045767475                             | 5.283852259  |
|                | S489 | -1.195872065  | -1.519084441                             | 5.965231708  |
| <b>5 (S=1)</b> |      |               | <b>bm12b2x6x2h2ndh2twbconexdtg.car_3</b> |              |
| Fe(139) 2.222  | C1   | -3.094260160  | 0.889311539                              | -9.218326863 |
| Fe(140) -0.049 | C2   | -3.395525309  | 1.917393620                              | -8.122624940 |
| Fe(141) 2.226  | C3   | -3.505120965  | 4.303423173                              | -7.537291397 |
| Fe(142) -2.702 | C4   | -4.896739197  | 4.339676787                              | -6.906247213 |
| Fe(143) 3.166  | C5   | -7.286973835  | 3.905043157                              | -7.150501172 |
| Fe(144) -2.433 | C6   | -7.488348070  | 2.840891954                              | -6.067879988 |
| Fe(145) -0.835 | C7   | -6.756282504  | 0.687425781                              | -5.162881568 |
|                | C8   | -6.085781915  | 1.137468246                              | -3.860838065 |
|                | C9   | -4.250555970  | 2.349909236                              | -2.808599884 |
|                | C10  | -5.047222591  | 3.436800402                              | -2.071790824 |
|                | C11  | -6.523388004  | 5.360875530                              | -2.222071976 |
|                | C12  | -7.820577241  | 4.858405923                              | -1.571384634 |
|                | C13  | -9.878256754  | 3.560890767                              | -1.849373655 |
|                | C14  | -9.935307780  | 2.322316832                              | -0.948312329 |

|     |               |              |              |
|-----|---------------|--------------|--------------|
| C15 | -8.958120732  | 0.128766137  | -0.409772103 |
| C16 | -7.884249527  | -0.072951662 | 0.662552888  |
| C17 | -5.839396483  | 0.867821652  | 1.698895692  |
| C18 | -5.881389165  | 2.021739221  | 2.714173097  |
| C19 | -4.495476795  | 0.751186183  | 0.930325518  |
| C20 | -3.292068165  | 0.773008624  | 1.880363867  |
| C21 | -4.473133269  | -0.507374291 | 0.055535322  |
| C22 | -5.760657004  | 4.444460009  | 3.104263888  |
| C23 | -7.215141341  | 4.771168041  | 3.496701709  |
| C24 | -5.004409439  | 5.647345496  | 2.493965333  |
| C25 | -5.185977421  | 6.909106447  | 3.346313254  |
| C26 | -3.513164281  | 5.323782501  | 2.338095787  |
| C27 | -9.515272480  | 5.102751505  | 2.799774733  |
| C28 | -10.090419637 | 4.115437072  | 3.794918484  |
| C29 | -9.695852305  | -9.261615562 | -0.563180640 |
| C30 | -8.466751414  | -9.122700370 | 0.338130055  |
| C31 | -7.442001705  | -7.622295854 | 2.063891749  |
| C32 | -8.022437546  | -7.749684604 | 3.484899109  |
| C33 | -6.992516131  | -6.184679361 | 1.746928293  |
| C34 | -5.845676626  | -5.673056738 | 2.620971269  |
| C35 | -5.296974767  | -4.354202476 | 2.069391945  |
| C36 | -3.927078129  | -2.805353115 | 3.493879204  |
| C37 | -7.710125207  | -8.700134299 | 5.717902276  |
| C38 | -7.042355268  | -7.833322519 | 6.765973397  |
| C39 | 0.090542377   | 1.216398048  | -5.837189879 |
| C40 | 0.588351334   | 2.502691077  | -5.159424380 |
| C41 | 0.052100416   | 0.121143953  | -4.742042445 |
| C42 | -0.701511136  | -1.178726319 | -5.100946203 |
| C43 | 0.173805384   | -2.261379166 | -5.726389430 |
| C44 | 2.566477515   | 3.919064651  | -4.799512271 |
| C45 | 2.139908397   | 5.317759759  | -5.265405204 |
| C46 | 4.094029934   | 3.757422266  | -4.917618538 |
| C47 | 0.519257508   | 6.603393681  | -6.590666889 |
| C48 | -0.734495435  | 6.864855044  | -5.740265837 |
| C49 | -2.222059498  | 6.012537077  | -3.972623491 |
| C50 | -1.885014434  | 6.185114927  | -2.486866064 |
| C51 | -0.292303696  | 5.931308840  | -0.640409603 |
| C52 | -0.189047931  | 7.433413208  | -0.311031348 |
| C53 | 1.100198467   | 5.353912819  | -0.329411286 |
| C54 | 1.295656047   | 3.876535977  | -0.469394254 |
| C55 | 0.537151962   | 2.823707418  | 0.002994578  |
| C56 | 2.402924250   | 2.053647224  | -0.891617525 |
| C57 | 0.847339314   | 9.530391879  | -1.111564669 |
| C58 | -0.378453306  | 10.432757660 | -0.987823333 |
| C59 | 1.683942387   | 9.920009566  | -2.346862345 |
| C60 | 2.499543039   | 11.174973301 | -2.246983137 |
| C61 | 2.476406490   | 12.202161376 | -1.324740816 |
| C62 | 4.053466528   | 12.556572506 | -2.840848533 |
| C63 | -2.962055124  | -2.699652433 | 8.762611743  |
| C64 | -3.527341022  | -4.097735843 | 8.932456310  |
| C65 | -2.884197569  | -2.423618537 | 7.239581441  |
| C66 | -2.467765449  | -1.006259189 | 6.920379927  |
| C67 | -3.421769395  | 0.010608184  | 6.732194026  |
| C68 | -1.108142680  | -0.659436799 | 6.811998180  |
| C69 | -3.041231234  | 1.322263969  | 6.424982352  |
| C70 | -0.713697871  | 0.647547880  | 6.528514696  |
| C71 | -1.679914829  | 1.635769767  | 6.324713507  |
| C72 | 4.564835688   | 0.979808960  | 7.596072127  |
| C73 | 5.440486796   | 2.149685440  | 7.128814612  |
| C74 | 3.626869178   | 0.535689710  | 6.467420263  |
| C75 | 7.699776198   | 2.852411445  | 6.450884190  |
| C76 | 7.607806090   | 3.248568891  | 4.975564211  |
| C77 | 6.585505406   | 2.788898631  | 2.777816337  |
| C78 | 5.263215660   | 3.572812006  | 2.617427482  |
| C79 | 6.631511397   | 1.515350551  | 1.914435603  |
| C80 | 6.437379968   | 1.701236910  | 0.403512522  |
| C81 | 7.554556149   | 2.434424111  | -0.352614838 |
| C82 | 8.340105433   | 4.793010777  | -0.217131768 |
| C83 | 2.903260920   | 3.808577018  | 3.148957320  |
| C84 | 2.790699190   | 5.128945862  | 3.929385292  |
| C85 | 1.700292399   | 2.931786205  | 3.537821895  |
| C86 | 3.198502693   | 6.181915796  | 6.101863680  |
| C87 | 4.191838553   | 7.292075165  | 6.415487074  |
| C88 | 6.290635196   | 8.424583502  | 5.856530611  |
| C89 | 5.926408787   | 9.861496702  | 5.424683726  |
| C90 | 7.656288698   | 7.986170799  | 5.290674408  |
| C91 | 7.696452258   | 7.967917732  | 3.764593048  |
| C92 | 4.608816582   | 11.241663040 | 3.883082127  |
| C93 | 4.095095417   | 12.251972877 | 4.894823566  |
| C94 | 3.527355252   | 11.014655110 | 2.789214371  |

|       |               |               |              |
|-------|---------------|---------------|--------------|
| C95   | 3.977259647   | 10.008396964  | 1.754668662  |
| C96   | 4.909726082   | 10.372503352  | 0.767424910  |
| C97   | 3.541007498   | 8.673805478   | 1.787485629  |
| C98   | 5.394832243   | 9.442944133   | -0.147800642 |
| C99   | 4.035913183   | 7.723033738   | 0.886665749  |
| C100  | 4.966360166   | 8.108308635   | -0.085900505 |
| C101  | 5.987115213   | -8.836829905  | -1.390884787 |
| C102  | 5.911620803   | -7.627727143  | -2.315119227 |
| C103  | 5.293816190   | -5.230234848  | -2.418376653 |
| C104  | 6.355953989   | -4.146782360  | -2.197421483 |
| C105  | 7.371924771   | -2.641233030  | -0.550317704 |
| C106  | 7.954305828   | -2.691348682  | 0.857520689  |
| C107  | 7.847972425   | -3.584279223  | 3.136277828  |
| C108  | 8.711854621   | -4.777412792  | 3.488509599  |
| C109  | 6.297110709   | -4.597411016  | -6.701862945 |
| C110  | 6.524419899   | -3.092790037  | -6.911810560 |
| C111  | 4.807960678   | -4.837232387  | -6.344340951 |
| C112  | 4.468813499   | -6.323378605  | -6.270356202 |
| C113  | 3.023401542   | -6.612841653  | -5.933372617 |
| C114  | 6.922938607   | -0.912113915  | -5.857205089 |
| C115  | 8.093596987   | -0.477785741  | -4.996293777 |
| C116  | 5.626231392   | -0.094535378  | -5.627593796 |
| C117  | 4.853071999   | -0.598703530  | -4.438706849 |
| C118  | 5.187461984   | -0.211641394  | -3.130179796 |
| C119  | 3.863732439   | -1.577946837  | -4.619996335 |
| C120  | 4.584106247   | -0.838655495  | -2.036272952 |
| C121  | 3.265507894   | -2.208338846  | -3.525771857 |
| C122  | 3.646177887   | -1.855675842  | -2.228764279 |
| C123  | 0.471799976   | -10.859919261 | 1.469222632  |
| C124  | -0.537487215  | -11.279133972 | 2.550149785  |
| C125  | -0.185584317  | -10.298488724 | 0.197458841  |
| C126  | 0.755357092   | -9.718527593  | -0.815780873 |
| C127  | 1.565435691   | -10.408251142 | -1.695301225 |
| C128  | 1.726388896   | -8.235185677  | -2.089734722 |
| C129  | -2.663695118  | -12.284932529 | 3.170093244  |
| C130  | -2.037888636  | -13.231323139 | 4.171004958  |
| C131  | -3.409621101  | -5.047604238  | -3.408047321 |
| C132  | -3.509649787  | -5.663040233  | -2.040376352 |
| C133  | -2.592137465  | -6.939169480  | -1.856704013 |
| C134  | -2.946763148  | -8.003987451  | -2.934718059 |
| C135  | -2.206892963  | -9.330285860  | -2.698719043 |
| C136  | -2.648107669  | -10.449988539 | -3.595919669 |
| C137  | -2.963454558  | -7.554203531  | -0.472437191 |
| C138  | 1.435055664   | -3.718944791  | 1.761512507  |
| Fe139 | 2.162999490   | -5.290396062  | 0.801294586  |
| Fe140 | 0.984663130   | -1.600111520  | 1.664412537  |
| Fe141 | 1.276701975   | -3.314103192  | 3.626496597  |
| Fe142 | 3.366487791   | -3.499460908  | 2.139397519  |
| Fe143 | 3.221195256   | -1.386470003  | 3.707232738  |
| Fe144 | 0.049716708   | -5.090179853  | 2.245083778  |
| Fe145 | 0.269954765   | -3.719114416  | -0.029731257 |
| H146  | -3.524143993  | -0.753429126  | -8.084368392 |
| H147  | -1.920778301  | -0.505653580  | -8.289687417 |
| H148  | -2.910569150  | 3.449943928   | -9.403864407 |
| H149  | -2.254882781  | 1.246506231   | -9.835449715 |
| H150  | -3.977736001  | 0.881204438   | -9.881839604 |
| H151  | -2.791129263  | 4.234474286   | -6.704461666 |
| H152  | -5.756515102  | 3.666975993   | -8.647582647 |
| H153  | -3.333207733  | 5.255786868   | -8.056504444 |
| H154  | -7.982252606  | 3.701519559   | -7.975899984 |
| H155  | -5.997667139  | 1.688036572   | -6.884094366 |
| H156  | -7.556302379  | 4.870267608   | -6.701901846 |
| H157  | -4.066955238  | 1.544553936   | -2.086507669 |
| H158  | -4.509007279  | 1.959051452   | -4.912282589 |
| H159  | -6.239176629  | -0.200485840  | -5.551381950 |
| H160  | -5.941097913  | 5.857405841   | -1.435224408 |
| H161  | -5.624979872  | 4.296820714   | -3.862745058 |
| H162  | -7.786963487  | 0.407433607   | -4.913116544 |
| H163  | -3.277914600  | 2.757024230   | -3.118342574 |
| H164  | -8.274091127  | 3.735082218   | -3.252176556 |
| H165  | -6.777622209  | 6.104240363   | -2.990067523 |
| H166  | -5.307694966  | -0.520780915  | -0.658845830 |
| H167  | -3.535113447  | -0.552281523  | -0.519409757 |
| H168  | -4.527122616  | -1.418547610  | 0.671424227  |
| H169  | -4.423058974  | 1.630106972   | 0.269025324  |
| H170  | -10.495988682 | 3.350863769   | -2.734366893 |
| H171  | -3.342498271  | 4.419090176   | 1.736808923  |
| H172  | -7.855337573  | 4.768337768   | 1.507381996  |
| H173  | -6.239652702  | 7.212719312   | 3.427371733  |
| H174  | -2.357362912  | 0.781782323   | 1.299881308  |

|      |               |              |              |
|------|---------------|--------------|--------------|
| H175 | -3.267104651  | -0.122104684 | 2.518117233  |
| H176 | -3.701931676  | -1.996617266 | 9.191312088  |
| H177 | -2.992112517  | 6.158630599  | 1.847237878  |
| H178 | -4.623222798  | 7.741740061  | 2.900001706  |
| H179 | -3.050280204  | 5.171001345  | 3.327410581  |
| H180 | -4.800867132  | 6.746242576  | 4.365335438  |
| H181 | -5.429732750  | 5.842572261  | 1.492676595  |
| H182 | -5.280459854  | 4.165252511  | 4.054134856  |
| H183 | -5.486254057  | 3.418500860  | 1.229189567  |
| H184 | -3.286337407  | 1.656869838  | 2.535705548  |
| H185 | 1.833609381   | 1.919842052  | 3.117485156  |
| H186 | 0.810297532   | 3.386928178  | 3.078102448  |
| H187 | 0.605365590   | 2.935479331  | 5.174055842  |
| H188 | -1.978467817  | 3.502456878  | 5.869899428  |
| H189 | 0.342750223   | 0.891053977  | 6.411720847  |
| H190 | -0.342662872  | -1.432697328 | 6.904914575  |
| H191 | -4.487467626  | -0.220205594 | 6.820972713  |
| H192 | -7.056855792  | 1.715871442  | 0.147356286  |
| H193 | -8.836967931  | -0.692155839 | -1.133347762 |
| H194 | -9.936845002  | 0.010828949  | 0.074651220  |
| H195 | -8.260281560  | 1.505960973  | -1.865276370 |
| H196 | -10.353023061 | 4.374836669  | -1.286879534 |
| H197 | -3.803099750  | 2.086379006  | 6.252441720  |
| H198 | -5.987870383  | -0.041388373 | 2.294265809  |
| H199 | -9.665460679  | 6.124641443  | 3.184261192  |
| H200 | -10.092791093 | 5.004861543  | 1.867264220  |
| H201 | -9.577891312  | 3.125637557  | 3.826924731  |
| H202 | -7.564200418  | -9.759094778 | 5.983358405  |
| H203 | 0.625336111   | -4.255239176 | -5.582546280 |
| H204 | -4.936569722  | -6.113368905 | -3.911479509 |
| H205 | 4.687216380   | -6.817927197 | -7.234271398 |
| H206 | 5.092780960   | -6.830751703 | -5.513116932 |
| H207 | 4.175863052   | -4.353414657 | -7.105768864 |
| H208 | 8.894700856   | -1.245383189 | -4.884601703 |
| H209 | 6.471584309   | -5.035761767 | -7.697121710 |
| H210 | 1.087367107   | -0.115211999 | -4.447352798 |
| H211 | -1.521033679  | -0.962876411 | -5.807807609 |
| H212 | 6.759269303   | -2.806919701 | -4.868397693 |
| H213 | 7.262293966   | -0.708659133 | -6.893213493 |
| H214 | 7.168294043   | -4.854694849 | -4.829643485 |
| H215 | -0.655008564  | -3.726688654 | -4.503933141 |
| H216 | 4.567584537   | -4.351992306 | -5.386633189 |
| H217 | 7.215200104   | -6.186291375 | -5.783132990 |
| H218 | 0.577831558   | 1.187290544  | -7.846192064 |
| H219 | -0.434037660  | 0.564258876  | -3.861020977 |
| H220 | 3.526438979   | -8.472151630 | -5.925795940 |
| H221 | -1.179397500  | -1.573164740 | -4.193548503 |
| H222 | -1.054766309  | 5.508716914  | 0.029360135  |
| H223 | -0.419822408  | 2.785622607  | 0.514478913  |
| H224 | -2.787379550  | 6.905224126  | -4.264179855 |
| H225 | -0.575776066  | 4.991502452  | -4.857778848 |
| H226 | 0.589533259   | 7.701280713  | -2.185527387 |
| H227 | 1.858745270   | 12.386490761 | -0.452859930 |
| H228 | -1.235815448  | 10.112519990 | -1.628131180 |
| H229 | 1.020332406   | 9.973322895  | -3.230119798 |
| H230 | 1.450640095   | 9.615938140  | -0.194635167 |
| H231 | 4.873878980   | 13.048703137 | -3.355756474 |
| H232 | 1.323160638   | 5.656524552  | 0.707674120  |
| H233 | 1.845672283   | 5.855603717  | -0.964588508 |
| H234 | 3.736578695   | 13.931276756 | -1.247480664 |
| H235 | 2.382504291   | 9.088550703  | -2.538778694 |
| H236 | -0.156058872  | 5.040763623  | -2.595221631 |
| H237 | -2.902351670  | 5.154038820  | -4.079991502 |
| H238 | 1.188007094   | 7.461741499  | -6.444332690 |
| H239 | 3.148971736   | 1.336750173  | -1.220006015 |
| H240 | 0.221448135   | 6.585429803  | -7.647597016 |
| H241 | 1.056304654   | 0.737161462  | 0.089388339  |
| H242 | -1.733405628  | -2.586577818 | 10.397879928 |
| H243 | -1.178409539  | -1.758945650 | 9.106050739  |
| H244 | 4.216914635   | 2.217046937  | 3.815803908  |
| H245 | 2.800087898   | 4.073051624  | 2.086349341  |
| H246 | 4.046058832   | 4.393802160  | 5.370612968  |
| H247 | 3.976873721   | 4.246907132  | -1.227598738 |
| H248 | 4.885896410   | 4.683679539  | -2.435014658 |
| H249 | 5.034884816   | 6.337744638  | -1.022964669 |
| H250 | 4.386045144   | 2.785645602  | -4.496230401 |
| H251 | 4.392966010   | 3.784007171  | -5.979686093 |
| H252 | 7.913997237   | 7.006850991  | 5.720657270  |
| H253 | 8.401304922   | 8.718734036  | 5.632056241  |
| H254 | 7.827408350   | 5.869117237  | 3.721054001  |

|      |               |               |              |
|------|---------------|---------------|--------------|
| H255 | 7.698952902   | 6.682639074   | 2.171517133  |
| H256 | 10.342361841  | 5.133037410   | 0.053018187  |
| H257 | 7.586744275   | 2.083459602   | -1.396470904 |
| H258 | 6.104613405   | 9.739848545   | -0.922409660 |
| H259 | 2.805185020   | 8.350539082   | 2.529532116  |
| H260 | 7.101960970   | 6.445604760   | -0.407988601 |
| H261 | 5.857677796   | 0.815653590   | 2.267679238  |
| H262 | 6.331627608   | 1.676483443   | 4.589462796  |
| H263 | 5.468730088   | 2.177465455   | 0.186123993  |
| H264 | 0.965227057   | 4.510697108   | -6.716105857 |
| H265 | 8.719186402   | 2.487559232   | 6.636442514  |
| H266 | 2.305287532   | 2.195904607   | -6.142885273 |
| H267 | 7.603703876   | 1.028420528   | 2.095634424  |
| H268 | 3.729107721   | 6.679731241   | 0.972441756  |
| H269 | 4.245949140   | 5.601979636   | -4.295917474 |
| H270 | 7.565778421   | 3.780944888   | 7.023241762  |
| H271 | 9.937700174   | 3.494887327   | -0.323485581 |
| H272 | 8.792015986   | 6.763931155   | -0.352767986 |
| H273 | 1.039723656   | -0.183913966  | -7.008912580 |
| H274 | -0.954393585  | 1.426406695   | -6.133223142 |
| H275 | 5.260139653   | 11.405959225  | 0.711303522  |
| H276 | 2.309029669   | 3.892613581   | -3.725967630 |
| H277 | 7.368565454   | 3.488261134   | 2.461056726  |
| H278 | 8.522171772   | 2.186452277   | 0.103764317  |
| H279 | 6.381676055   | 0.691730220   | -0.027771136 |
| H280 | 6.421404180   | 4.225232373   | -0.619283117 |
| H281 | 2.253621801   | 6.667813287   | 5.815691941  |
| H282 | 5.370246434   | 6.753758805   | 4.824192187  |
| H283 | 6.385077705   | 8.483163548   | 6.950967174  |
| H284 | 3.030307425   | 5.639424185   | 7.043482143  |
| H285 | 4.582421638   | 9.122810175   | 4.080774660  |
| H286 | 6.327730024   | -8.522449393  | -0.392859101 |
| H287 | 4.944088038   | -9.193477595  | -1.270108999 |
| H288 | 1.077759918   | -10.067375032 | 1.932092563  |
| H289 | 6.709327419   | -10.745555238 | -1.509208251 |
| H290 | 6.701236303   | -9.937750766  | -2.938750060 |
| H291 | 3.066114139   | -0.344027571  | 6.808273755  |
| H292 | 3.259614372   | 2.205611519   | 8.565083679  |
| H293 | 7.058005425   | 0.890650300   | 7.000286382  |
| H294 | 2.919874527   | 1.343072789   | 6.231254384  |
| H295 | 4.376433041   | 1.547885817   | 9.558125320  |
| H296 | 6.974386398   | -3.560537289  | 3.806960357  |
| H297 | 5.210437851   | 0.130288328   | 7.870365834  |
| H298 | -7.866924626  | -5.516316354  | 1.824730764  |
| H299 | -6.594276954  | -8.306489286  | 1.935859128  |
| H300 | 6.587521963   | -4.119076121  | 1.512400507  |
| H301 | -2.577354490  | -1.690367926  | 4.541191339  |
| H302 | 8.212821838   | -2.654305381  | -1.254848664 |
| H303 | 2.506955130   | -2.979364326  | -3.677670149 |
| H304 | 6.897489586   | -1.650583845  | -0.652308851 |
| H305 | -6.056212411  | -3.559901288  | 2.090298889  |
| H306 | 5.689217481   | -3.987464817  | -0.277910599 |
| H307 | -5.027043537  | -4.490060206  | 1.009282906  |
| H308 | -6.673102914  | -6.182945940  | 0.691873706  |
| H309 | -5.021841126  | -6.402505916  | 2.638093345  |
| H310 | -6.175695609  | -5.528354045  | 3.662614352  |
| H311 | 5.015314188   | -0.165956756  | -6.538486472 |
| H312 | -9.335172469  | -7.469250492  | 1.050260393  |
| H313 | -9.350124661  | -9.032235043  | -1.582785388 |
| H314 | 3.209030001   | -2.359399961  | -1.368512607 |
| H315 | -11.422175394 | -8.795788393  | 0.458433148  |
| H316 | -11.345948335 | -8.126033750  | -1.035605920 |
| H317 | -3.210635157  | -4.353466105  | 2.429590021  |
| H318 | 4.835479246   | -0.547923819  | -1.014103956 |
| H319 | 3.564274716   | -1.856546270  | -5.632966281 |
| H320 | -4.283017092  | -11.772078545 | 0.010441641  |
| H321 | -0.757213711  | -11.105747537 | -0.293392914 |
| H322 | -4.500303696  | -9.403220051  | 0.547420950  |
| H323 | -3.637823789  | -12.248337875 | -1.315240776 |
| H324 | 9.066028779   | -5.384839388  | 2.621002744  |
| H325 | -2.497689126  | -7.537623286  | 2.112196467  |
| H326 | -4.548809303  | -5.938832202  | -1.805020268 |
| H327 | 5.344254924   | -6.460051312  | -0.701470196 |
| H328 | -4.033435076  | -8.185019365  | -2.914650937 |
| H329 | 2.795163215   | -9.632543763  | -3.267060277 |
| H330 | 2.030003568   | -7.299484164  | -2.546890581 |
| H331 | -9.970904430  | -10.330358488 | -0.556647781 |
| H332 | -1.908670204  | -3.125274716  | 3.837485726  |
| H333 | -3.991724772  | -8.746153880  | 3.548674519  |
| H334 | -2.040664951  | -7.004472029  | 3.502670876  |

|       |               |               |              |
|-------|---------------|---------------|--------------|
| H335  | -6.326051684  | -8.810561486  | 4.069591243  |
| H336  | -5.932154380  | -2.352730005  | 3.674332760  |
| H337  | -2.837120981  | -10.941588009 | -5.411922232 |
| H338  | -1.128879257  | -9.161520718  | -2.843028469 |
| H339  | -2.354202702  | -9.682734286  | -1.671716560 |
| H340  | -2.675369947  | -7.603869492  | -3.922123226 |
| H341  | 4.313055714   | -4.848761323  | -2.092041586 |
| H342  | 5.940847410   | 0.565423660   | -2.975591897 |
| H343  | 5.930038090   | 0.956068871   | -5.500953013 |
| H344  | -3.154339370  | -4.926584712  | -1.307095847 |
| H345  | -4.744437740  | -9.812751297  | 2.702882580  |
| H346  | -5.839087830  | -10.172985612 | 0.748202574  |
| H347  | -4.865556828  | -1.284901112  | 4.505347492  |
| H348  | 1.755902639   | -11.468782978 | -1.813562815 |
| H349  | -0.903052195  | -9.519627869  | 0.486174243  |
| H350  | 5.261626633   | -5.457217440  | -3.487528690 |
| H351  | 8.442539240   | -2.675778802  | 3.324374487  |
| H352  | -3.881217200  | -2.624589417  | 6.818114472  |
| H353  | -2.177289261  | -3.138710725  | 6.788704451  |
| H354  | 1.852283655   | -12.270558182 | 2.017871978  |
| H355  | 0.822677930   | -12.794620936 | 0.858640850  |
| H356  | -3.462400911  | -12.843764191 | 2.656466028  |
| H357  | -2.008084351  | -11.874155429 | 1.186176083  |
| H358  | -1.158167946  | -13.805640392 | 3.792991297  |
| H359  | -3.135573906  | -11.442284786 | 3.700908096  |
| H360  | -2.761027254  | -4.910657870  | 8.936174295  |
| H361  | 3.610637486   | 11.811985066  | 5.798580586  |
| H362  | -8.791970131  | -8.485861677  | 5.762249419  |
| H363  | -6.527036741  | -6.921378548  | 6.378846814  |
| H364  | 5.512722664   | 11.664082069  | 3.413457734  |
| H365  | 2.592670464   | 10.680257446  | 3.266145016  |
| H366  | 3.330589720   | 11.993332502  | 2.326407805  |
| H367  | 0.918652199   | -0.069634811  | 1.587993397  |
| H368  | -0.499439621  | -1.120138256  | -0.785387698 |
| H369  | -0.728267623  | -3.473303016  | -1.135350797 |
| H370  | -0.583088734  | -1.161833206  | 1.775310710  |
| H371  | -0.621863657  | -1.996868445  | 1.682715177  |
| Mo372 | -0.164112139  | -6.370365782  | -0.143189317 |
| N373  | -2.821919619  | -0.466893633  | -8.771530279 |
| N374  | -3.303044074  | 3.223892707   | -8.493466782 |
| N375  | -5.935296297  | 3.948061302   | -7.686471510 |
| N376  | -6.750454336  | 1.710743639   | -6.197424720 |
| N377  | -4.926120963  | 1.830448549   | -3.989583252 |
| N378  | -5.733726981  | 4.310944989   | -2.845760086 |
| N379  | -8.562791740  | 3.985463371   | -2.302401381 |
| N380  | -8.941770088  | 1.403309204   | -1.107990921 |
| N381  | -6.985566706  | 0.936278816   | 0.798718036  |
| N382  | -5.700929404  | 3.279865490   | 2.219042628  |
| N383  | -8.126989494  | 4.818719945   | 2.491160811  |
| N384  | -10.789600890 | -8.349167504  | -0.209248253 |
| N385  | -8.475364022  | -8.024511125  | 1.116110937  |
| N386  | -4.081997657  | -3.911115357  | 2.756909733  |
| N387  | -4.982800216  | -2.027719644  | 3.823288173  |
| N388  | -2.686575319  | -2.423930660  | 3.843432585  |
| N389  | -7.255978613  | -8.439938675  | 4.365012459  |
| N390  | 0.956780928   | 0.847252054   | -6.960082673 |
| N391  | 0.022263574   | -3.507181264  | -5.236003416 |
| N392  | 1.866346261   | 2.837484734   | -5.465438658 |
| N393  | 1.233283703   | 5.383534740   | -6.267317067 |
| N394  | -1.097518186  | 5.874740844   | -4.879769798 |
| N395  | -0.672652066  | 5.725066063   | -2.041454480 |
| N396  | 2.463097673   | 3.379395021   | -1.031844249 |
| N397  | 1.253384324   | 1.684291254   | -0.282519721 |
| N398  | 0.410498598   | 8.157994480   | -1.294538002 |
| N399  | 3.486176951   | 11.409191861  | -3.191323646 |
| N400  | 3.473497347   | 13.070939973  | -1.719790397 |
| N401  | -1.637240394  | -2.631836933  | 9.380325203  |
| N402  | 3.756242476   | 1.332777526   | 8.772038170  |
| N403  | 6.753913226   | 1.856449320   | 6.910287485  |
| N404  | 6.863095472   | 2.457702707   | 4.173644856  |
| N405  | 7.373144740   | 3.892169652   | -0.367025794 |
| N406  | 9.627915853   | 4.422091356   | -0.057787516 |
| N407  | 8.041459331   | 6.113771371   | -0.130534409 |
| N408  | 4.182750491   | 3.126250675   | 3.317490867  |
| N409  | 3.560974574   | 5.238501010   | 5.054481322  |
| N410  | 5.248057484   | 7.444507106   | 5.565157397  |
| N411  | 7.709389546   | 6.739873196   | 3.189994156  |
| N412  | 4.916489608   | 9.975121125   | 4.527405052  |
| N413  | 6.905014518   | -9.839107445  | -1.939397540 |
| N414  | 5.575852155   | -6.465237465  | -1.702327659 |



|                  |               |                                  |              |
|------------------|---------------|----------------------------------|--------------|
| N415             | 6.444254953   | -3.691017781                     | -0.929402982 |
| N416             | 7.421120298   | -3.568634140                     | 1.749653247  |
| N417             | 7.306578919   | -5.167919938                     | -5.798949660 |
| N418             | 6.764239017   | -2.355651341                     | -5.789859144 |
| N419             | 1.376154247   | -11.984790358                    | 1.157432902  |
| N420             | 0.873525602   | -8.354391253                     | -1.076585886 |
| N421             | 2.168530777   | -9.455368639                     | -2.487889780 |
| N422             | -1.713227848  | -11.846314001                    | 2.160866626  |
| O423             | -3.769103777  | 1.587063311                      | -6.981091263 |
| O424             | -5.049284147  | 4.722293421                      | -5.734861933 |
| O425             | -8.307724138  | 3.011729734                      | -5.149927927 |
| O426             | -6.584929864  | 0.883060629                      | -2.753604622 |
| O427             | -5.048375519  | 3.507700125                      | -0.831890437 |
| O428             | -8.172033868  | 5.269189658                      | -0.452268635 |
| O429             | -10.876880253 | 2.184740167                      | -0.155645200 |
| O430             | -7.870210534  | -1.123603033                     | 1.322194982  |
| O431             | -6.077569668  | 1.801954703                      | 3.918412735  |
| O432             | -7.541680414  | 4.965931425                      | 4.678877807  |
| O433             | -11.077000949 | 4.347512443                      | 4.476748224  |
| O434             | -7.559591698  | -9.980001813                     | 0.283960385  |
| O435             | -9.128362717  | -7.252075934                     | 3.762139296  |
| O436             | -7.070938504  | -8.089868754                     | 7.959094301  |
| O437             | -0.131228304  | 3.173373818                      | -4.388406811 |
| O438             | 0.984908855   | -2.002325934                     | -6.644402602 |
| O439             | 2.604448779   | 6.325585798                      | -4.694694957 |
| O440             | 4.781411748   | 4.775403204                      | -4.180564620 |
| O441             | -1.343945562  | 7.934106544                      | -5.877904059 |
| O442             | -2.687118699  | 6.756010454                      | -1.740621535 |
| O443             | -0.500864886  | 7.899015007                      | 0.787857109  |
| O444             | -0.445717425  | 11.427011163                     | -0.285389218 |
| O445             | -4.720515051  | -4.347257138                     | 9.030526453  |
| O446             | -1.224380476  | 2.898090439                      | 5.996294943  |
| O447             | 4.990454612   | 3.299087193                      | 6.970367877  |
| O448             | 8.235442685   | 4.255416640                      | 4.586524033  |
| O449             | 5.217254811   | 4.564379616                      | 1.873297538  |
| O450             | 1.984729021   | 5.993470777                      | 3.561087714  |
| O451             | 1.556597633   | 2.870173598                      | 4.961638597  |
| O452             | 4.012019523   | 8.023819334                      | 7.398585697  |
| O453             | 6.518288978   | 10.838509273                     | 5.905366190  |
| O454             | 7.681395159   | 9.024155983                      | 3.112344835  |
| O455             | 4.151718765   | 13.459674715                     | 4.717425857  |
| O456             | 5.514238297   | 7.223507352                      | -0.990240029 |
| O457             | 6.103028541   | -7.734103366                     | -3.542092847 |
| O458             | 7.076687230   | -3.726915424                     | -3.130139757 |
| O459             | 8.872395430   | -1.904531601                     | 1.144991990  |
| O460             | 9.020951808   | -5.063010072                     | 4.634437612  |
| O461             | 6.461277292   | -2.579251440                     | -8.041822023 |
| O462             | 2.135457186   | -5.789953171                     | -5.806210132 |
| O463             | 2.725664201   | -7.938085130                     | -5.757060490 |
| O464             | 8.205575377   | 0.628035488                      | -4.488250004 |
| O465             | -0.245733213  | -11.199663065                    | 3.758191524  |
| O466             | -2.494107117  | -13.430065222                    | 5.288243704  |
| O467             | -2.583065327  | -4.222870518                     | -3.767720999 |
| O468             | -4.337036665  | -5.467333780                     | -4.331538869 |
| O469             | -3.070275087  | -11.542758756                    | -3.222594398 |
| O470             | -2.529384197  | -10.152120078                    | -4.917263590 |
| O471             | -1.990683013  | -7.647687825                     | 0.371445420  |
| O472             | -4.131396258  | -7.966601705                     | -0.269161562 |
| O473             | -1.258817485  | -6.595419120                     | -1.917942477 |
| O474             | -4.692775116  | -9.443288327                     | 3.624221174  |
| O475             | -2.798874063  | -7.421169698                     | 3.050027558  |
| O476             | 4.848491814   | 4.719583090                      | -1.441954630 |
| O477             | -3.916285923  | -12.577406800                    | -0.435577537 |
| O478             | -4.869961661  | -10.244068741                    | 0.948114292  |
| S479             | 4.533578044   | 0.105961552                      | 4.914296412  |
| S480             | 3.444623491   | -1.340916158                     | 1.493184320  |
| S481             | 1.456628431   | -5.050437254                     | -1.314241394 |
| S482             | 0.929706236   | -1.123068259                     | 3.892560639  |
| S483             | 0.756326870   | -1.630578899                     | -0.628280812 |
| S484             | 4.384097178   | -5.194444379                     | 1.112928953  |
| S485             | -1.578217040  | -4.635731199                     | 0.765415337  |
| S486             | 3.418569193   | -3.551073936                     | 4.373329738  |
| S487             | 1.079247015   | -7.015006374                     | 1.796706810  |
| S488             | -0.368237659  | -4.623493054                     | 4.375544491  |
| <b>6 (S=3/2)</b> |               | <b>bm12x6x2h2nconexdtc.car_3</b> |              |
| Fe(139)          | 2.043         | C1                               | -1.952709866 |
| Fe(140)          | -0.141        | C2                               | -2.451224252 |
|                  |               | C3                               | -2.707642136 |
|                  |               | C4                               | -4.177301122 |
|                  |               |                                  | 2.143629728  |
|                  |               |                                  | 3.023470718  |
|                  |               |                                  | 5.315886230  |
|                  |               |                                  | -7.253460713 |
|                  |               |                                  | -6.841901707 |

|         |        |     |               |              |              |
|---------|--------|-----|---------------|--------------|--------------|
| Fe(141) | 2.362  | C5  | -6.495779967  | 4.892859026  | -7.495421076 |
| Fe(142) | -2.695 | C6  | -6.845008391  | 3.713556392  | -6.578924984 |
| Fe(143) | 3.169  | C7  | -6.240947602  | 1.449145707  | -5.862566593 |
| Fe(144) | -2.460 | C8  | -5.667924174  | 1.692125654  | -4.463775679 |
| Fe(145) | 0.320  | C9  | -3.914513583  | 2.684935658  | -3.098628745 |
|         |        | C10 | -4.798781987  | 3.631280036  | -2.273307419 |
|         |        | C11 | -6.270697139  | 5.565338640  | -2.246494889 |
|         |        | C12 | -7.625392814  | 4.974373924  | -1.830317599 |
|         |        | C13 | -9.644806244  | 3.793408100  | -2.546423440 |
|         |        | C14 | -9.801823673  | 2.447078447  | -1.829638456 |
|         |        | C15 | -8.902020125  | 0.183971265  | -1.499123189 |
|         |        | C16 | -7.936106668  | -0.176610999 | -0.368072116 |
|         |        | C17 | -5.906948571  | 0.474096250  | 0.882382196  |
|         |        | C18 | -6.037386479  | 1.428791418  | 2.081306803  |
|         |        | C19 | -4.485784059  | 0.456756846  | 0.255255920  |
|         |        | C20 | -3.395251251  | 0.318791363  | 1.323347084  |
|         |        | C21 | -4.367310949  | -0.658568799 | -0.789403591 |
|         |        | C22 | -6.049019106  | 3.761465627  | 2.871832437  |
|         |        | C23 | -7.533322122  | 4.030626534  | 3.182726442  |
|         |        | C24 | -5.258154920  | 5.048446408  | 2.539937180  |
|         |        | C25 | -5.505497421  | 6.135705351  | 3.592167942  |
|         |        | C26 | -3.758451883  | 4.744886118  | 2.428282762  |
|         |        | C27 | -9.755987113  | 4.544893728  | 2.357306442  |
|         |        | C28 | -10.426028909 | 3.473583878  | 3.194287190  |
|         |        | C29 | -9.221744112  | -9.330024584 | -2.846895183 |
|         |        | C30 | -8.080368924  | -9.296405592 | -1.829359399 |
|         |        | C31 | -7.273046270  | -8.071333941 | 0.197705201  |
|         |        | C32 | -7.993513020  | -8.437450219 | 1.509960632  |
|         |        | C33 | -6.818650014  | -6.601037865 | 0.177185892  |
|         |        | C34 | -5.864991112  | -6.222467825 | 1.314511222  |
|         |        | C35 | -5.158722650  | -4.901778617 | 1.002830535  |
|         |        | C36 | -4.217550533  | -3.368784569 | 2.741574061  |
|         |        | C37 | -7.856627977  | -9.719691831 | 3.591800492  |
|         |        | C38 | -7.228423791  | -9.087622423 | 4.815409609  |
|         |        | C39 | 0.510476818   | 2.179741694  | -5.332690997 |
|         |        | C40 | 0.880114555   | 3.351179532  | -4.409403636 |
|         |        | C41 | 0.411962714   | 0.901551624  | -4.468910091 |
|         |        | C42 | -0.322161861  | -0.300765853 | -5.109641618 |
|         |        | C43 | 0.553211488   | -1.213673443 | -5.960163315 |
|         |        | C44 | 2.787025204   | 4.657993446  | -3.524472330 |
|         |        | C45 | 2.202401426   | 6.069565043  | -3.637693087 |
|         |        | C46 | 4.321974487   | 4.636304243  | -3.738841000 |
|         |        | C47 | 1.078041654   | 7.693287310  | -5.096371197 |
|         |        | C48 | -0.321473964  | 7.804207581  | -4.475591094 |
|         |        | C49 | -2.127048968  | 6.623127444  | -3.299558170 |
|         |        | C50 | -1.964153338  | 6.513311317  | -1.776416708 |
|         |        | C51 | -0.550317318  | 5.934137358  | 0.138929025  |
|         |        | C52 | -0.468172305  | 7.371899265  | 0.685833004  |
|         |        | C53 | 0.809672857   | 5.291967578  | 0.469159642  |
|         |        | C54 | 1.023853626   | 3.872408276  | 0.052234715  |
|         |        | C55 | 0.142716574   | 2.816454061  | -0.052339016 |
|         |        | C56 | 2.186236110   | 2.138514855  | -0.548762187 |
|         |        | C57 | 0.652101609   | 9.531198852  | 0.399009840  |
|         |        | C58 | -0.613697385  | 10.330502806 | 0.702786368  |
|         |        | C59 | 1.486215928   | 10.221603005 | -0.700186951 |
|         |        | C60 | 2.284947473   | 11.419257371 | -0.276003511 |
|         |        | C61 | 2.119238118   | 12.285206201 | 0.787001946  |
|         |        | C62 | 3.899190642   | 12.855429544 | -0.403457940 |
|         |        | C63 | -3.665711226  | -4.094061712 | 7.970260572  |
|         |        | C64 | -4.161555338  | -5.523592073 | 7.847757573  |
|         |        | C65 | -3.484709252  | -3.547929315 | 6.532110976  |
|         |        | C66 | -3.055356103  | -2.099022114 | 6.504567545  |
|         |        | C67 | -3.997585004  | -1.052925995 | 6.460202111  |
|         |        | C68 | -1.691910338  | -1.755544868 | 6.517911601  |
|         |        | C69 | -3.596125927  | 0.286877550  | 6.422422140  |
|         |        | C70 | -1.276934694  | -0.424797078 | 6.500347900  |
|         |        | C71 | -2.230314461  | 0.596105962  | 6.439283061  |
|         |        | C72 | 3.839294482   | -0.208584775 | 8.127678064  |
|         |        | C73 | 4.710493653   | 1.040485398  | 7.936287373  |
|         |        | C74 | 3.048057500   | -0.503061109 | 6.845860739  |
|         |        | C75 | 6.998208237   | 1.886929040  | 7.603303672  |
|         |        | C76 | 7.015194137   | 2.520847070  | 6.210775278  |
|         |        | C77 | 6.211043519   | 2.401962270  | 3.878625240  |
|         |        | C78 | 4.891691518   | 3.192135945  | 3.736179188  |
|         |        | C79 | 6.344883062   | 1.269377661  | 2.843691726  |
|         |        | C80 | 6.205410780   | 1.659816458  | 1.366589145  |
|         |        | C81 | 7.315936714   | 2.541246722  | 0.775270772  |
|         |        | C82 | 7.915931942   | 4.887589216  | 1.342260728  |
|         |        | C83 | 2.476525441   | 3.259953535  | 4.012428961  |
|         |        | C84 | 2.225940813   | 4.412902693  | 4.998104972  |

|       |              |               |               |
|-------|--------------|---------------|---------------|
| C85   | 1.290948791  | 2.283350504   | 4.108876233   |
| C86   | 2.363910127  | 5.077725278   | 7.351130376   |
| C87   | 3.295018417  | 6.113336031   | 7.968323387   |
| C88   | 5.374461768  | 7.403551609   | 7.800273351   |
| C89   | 4.987834019  | 8.884140972   | 7.601545444   |
| C90   | 6.797201029  | 7.125639431   | 7.276221297   |
| C91   | 6.930499723  | 7.348032442   | 5.771750506   |
| C92   | 3.733401974  | 10.490113126  | 6.251630165   |
| C93   | 3.183954999  | 11.321582834  | 7.400353613   |
| C94   | 2.701338175  | 10.463374339  | 5.091787711   |
| C95   | 3.211297509  | 9.669455976   | 3.912266608   |
| C96   | 4.110188101  | 10.242541947  | 3.000735540   |
| C97   | 2.859366453  | 8.319758489   | 3.740893676   |
| C98   | 4.650062714  | 9.497042414   | 1.951027046   |
| C99   | 3.409682851  | 7.550996439   | 2.710720538   |
| C100  | 4.301360981  | 8.150018788   | 1.823296388   |
| C101  | 6.457320149  | -8.322005212  | -2.187645558  |
| C102  | 6.338342829  | -6.968752941  | -2.881161768  |
| C103  | 5.546541664  | -4.638364070  | -2.603416925  |
| C104  | 6.516979496  | -3.570528240  | -2.087170118  |
| C105  | 7.236878115  | -2.298052822  | -0.122176263  |
| C106  | 7.803845165  | -2.575752368  | 1.267171957   |
| C107  | 7.682138513  | -3.825696958  | 3.370839299   |
| C108  | 8.550191401  | -5.051365690  | 3.558984698   |
| C109  | 7.061559016  | -3.319654351  | -6.611229780  |
| C110  | 7.292950277  | -1.804054392  | -6.551160743  |
| C111  | 5.537573694  | -3.591707955  | -6.540024289  |
| C112  | 5.202392039  | -5.056709333  | -6.804936068  |
| C113  | 3.719848969  | -5.356087225  | -6.828080688  |
| C114  | 7.438458352  | 0.193088998   | -5.139372919  |
| C115  | 8.445599949  | 0.527466390   | -4.056865535  |
| C116  | 6.081080088  | 0.927223214   | -5.011961672  |
| C117  | 5.177637719  | 0.254626201   | -4.013890947  |
| C118  | 5.337371279  | 0.463954532   | -2.633905207  |
| C119  | 4.244612808  | -0.700753054  | -4.448315004  |
| C120  | 4.623640460  | -0.312390677  | -1.716295274  |
| C121  | 3.533043117  | -1.477670463  | -3.529211749  |
| C122  | 3.742570206  | -1.302937070  | -2.158644854  |
| C123  | 0.718532224  | -11.100643076 | -0.187744030  |
| C124  | -0.342232531 | -11.651787628 | 0.776838730   |
| C125  | 0.117138284  | -10.198937917 | -1.278625543  |
| C126  | 1.115607533  | -9.473519468  | -2.126234396  |
| C127  | 2.013228345  | -10.019797746 | -3.020241051  |
| C128  | 2.135245521  | -7.810948292  | -3.108350951  |
| C129  | -2.492818004 | -12.737335867 | 1.115916522   |
| C130  | -1.910302677 | -13.808121844 | 2.012385486   |
| C131  | -2.932935360 | -4.486162708  | -4.416556605  |
| C132  | -3.103665235 | -5.326921828  | -3.182418876  |
| C133  | -2.147174902 | -6.585296912  | -3.124915383  |
| C134  | -2.357916964 | -7.467349449  | -4.389325282  |
| C135  | -1.575364410 | -8.788053410  | -4.309326699  |
| C136  | -1.934711610 | -9.773797801  | -5.382481627  |
| C137  | -2.621707434 | -7.427157539  | -1.899864961  |
| C138  | 1.432340854  | -3.980535879  | 1.383464671   |
| Fe139 | 2.239638038  | -5.398278689  | 0.301429492   |
| Fe140 | 0.968236021  | -1.918259863  | 1.566362512   |
| Fe141 | 1.063802915  | -3.845074476  | 3.276591742   |
| Fe142 | 3.311587953  | -3.876107439  | 2.008416941   |
| Fe143 | 3.024396479  | -1.999053987  | 3.807377095   |
| Fe144 | -0.043059321 | -5.316957525  | 1.470192091   |
| Fe145 | 0.560530233  | -3.589684915  | -0.564299398  |
| H146  | -2.421529941 | 0.365289615   | -8.384395366  |
| H147  | -0.819626204 | 0.707644279   | -8.336109275  |
| H148  | -1.812607185 | 4.709577070   | -9.097623261  |
| H149  | -1.070911099 | 2.609664922   | -9.728933250  |
| H150  | -2.750414739 | 2.163892452   | -10.027525935 |
| H151  | -2.120673347 | 5.145899862   | -6.339988462  |
| H152  | -4.753978943 | 4.824172286   | -8.763265106  |
| H153  | -2.481152945 | 6.327318551   | -7.616603152  |
| H154  | -7.055168278 | 4.788450447   | -8.434248496  |
| H155  | -5.274061212 | 2.638799318   | -7.342810405  |
| H156  | -6.835894964 | 5.804753539   | -6.987155627  |
| H157  | -3.767792060 | 1.780244493   | -2.494843236  |
| H158  | -3.967366139 | 2.573049236   | -5.250929363  |
| H159  | -5.734681049 | 0.588883932   | -6.321082841  |
| H160  | -5.777415577 | 5.911495992   | -1.329301477  |
| H161  | -5.210555033 | 4.780021584   | -3.947181966  |
| H162  | -7.300641443 | 1.198182414   | -5.733691686  |
| H163  | -2.929472426 | 3.146126247   | -3.262261632  |
| H164  | -7.899706570 | 4.171365091   | -3.721757756  |

|      |               |               |              |
|------|---------------|---------------|--------------|
| H165 | -6.448406353  | 6.432663502   | -2.896787186 |
| H166 | -5.103168338  | -0.539630479  | -1.597407731 |
| H167 | -3.363779403  | -0.653716530  | -1.241118142 |
| H168 | -4.514554500  | -1.647664608  | -0.327153449 |
| H169 | -4.342241794  | 1.424838836   | -0.250626625 |
| H170 | -10.152029366 | 3.714023022   | -3.519473999 |
| H171 | -3.538829139  | 4.040998151   | 1.612726232  |
| H172 | -7.993345097  | 4.367390027   | 1.174223812  |
| H173 | -6.564510196  | 6.425985465   | 3.653561117  |
| H174 | -2.404617903  | 0.342470864   | 0.845570669  |
| H175 | -3.467298490  | -0.641634388  | 1.854523551  |
| H176 | -4.467606115  | -3.506217102  | 8.457419901  |
| H177 | -3.201037316  | 5.673676234   | 2.239455929  |
| H178 | -4.920706244  | 7.032560511   | 3.341473225  |
| H179 | -3.386383627  | 4.308548549   | 3.369926689  |
| H180 | -5.189225056  | 5.790781502   | 4.589433802  |
| H181 | -5.613139661  | 5.427198785   | 1.563995973  |
| H182 | -5.648100926  | 3.328562718   | 3.800545143  |
| H183 | -5.644619223  | 3.064738520   | 0.875716500  |
| H184 | -3.427757643  | 1.128178763   | 2.067938123  |
| H185 | 1.524957774   | 1.374622169   | 3.528213633  |
| H186 | 0.420508025   | 2.773441075   | 3.648620430  |
| H187 | 0.063822539   | 2.046260686   | 5.634986920  |
| H188 | -2.510491270  | 2.510272130   | 6.280648141  |
| H189 | -0.215502113  | -0.176708440  | 6.472882545  |
| H190 | -0.936520905  | -2.543434189  | 6.498952063  |
| H191 | -5.066675507  | -1.284953449  | 6.448672259  |
| H192 | -6.873059966  | 1.537863863   | -0.709099371 |
| H193 | -8.731899051  | -0.545195124  | -2.306006053 |
| H194 | -9.918492516  | 0.032333799   | -1.113844919 |
| H195 | -8.056436037  | 1.725057681   | -2.694881755 |
| H196 | -10.183690789 | 4.530148134   | -1.936735108 |
| H197 | -4.341136151  | 1.084641290   | 6.362114290  |
| H198 | -6.122573695  | -0.521614494  | 1.290364192  |
| H199 | -9.916562782  | 5.526089115   | 2.832702211  |
| H200 | -10.259824544 | 4.553689331   | 1.377708647  |
| H201 | -9.977649945  | 2.456339815   | 3.102188850  |
| H202 | -7.785463049  | -10.815341508 | 3.668552004  |
| H203 | 1.103672463   | -3.174718222  | -6.178061086 |
| H204 | -4.348752696  | -5.519230143  | -5.224400898 |
| H205 | 5.624001226   | -5.379672688  | -7.774061436 |
| H206 | 5.663880562   | -5.708984179  | -6.041197848 |
| H207 | 5.030492687   | -2.962382585  | -7.288752793 |
| H208 | 9.243518231   | -0.239368338  | -3.918154573 |
| H209 | 7.395531344   | -3.601551587  | -7.622346656 |
| H210 | 1.426310871   | 0.605643606   | -4.156465620 |
| H211 | -1.144996532  | 0.059544991   | -5.750471483 |
| H212 | 7.199119774   | -1.829567859  | -4.475778466 |
| H213 | 7.920115164   | 0.555331744   | -6.070748164 |
| H214 | 7.644067980   | -3.838596778  | -4.684770798 |
| H215 | -0.140423425  | -2.904807880  | -4.973095647 |
| H216 | 5.143417311   | -3.285588743  | -5.559716458 |
| H217 | 7.801348867   | -5.042496979  | -5.776254913 |
| H218 | 1.274169937   | 2.637564760   | -7.195317869 |
| H219 | -0.135378988  | 1.168392263   | -3.553983363 |
| H220 | 4.217618579   | -7.190520399  | -7.140536091 |
| H221 | -0.793627240  | -0.889152129  | -4.310655242 |
| H222 | -1.366877473  | 5.437910906   | 0.681182729  |
| H223 | -0.928075031  | 2.742777565   | 0.105589683  |
| H224 | -2.660914307  | 7.563606662   | -3.479530073 |
| H225 | -0.367451397  | 5.765010133   | -4.123034259 |
| H226 | 0.664201529   | 7.873547137   | -0.962927431 |
| H227 | 1.386300081   | 12.324608325  | 1.584713505  |
| H228 | -1.458783791  | 10.108466550  | 0.007186151  |
| H229 | 0.827685794   | 10.480537905  | -1.549173790 |
| H230 | 1.240482662   | 9.446784787   | 1.327247708  |
| H231 | 4.780932434   | 13.415258907  | -0.704729169 |
| H232 | 0.936050789   | 5.386378894   | 1.561383221  |
| H233 | 1.603250683   | 5.894482072   | 0.002202971  |
| H234 | 3.335346983   | 13.959368556  | 1.329813581  |
| H235 | 2.198974141   | 9.476459758   | -1.088705122 |
| H236 | -0.194198282  | 5.439471158   | -1.926388967 |
| H237 | -2.775335029  | 5.806229709   | -3.646834816 |
| H238 | 1.664274733   | 8.525312644   | -4.681841653 |
| H239 | 2.984918059   | 1.469578165   | -0.853795213 |
| H240 | 0.989734344   | 7.858635192   | -6.178654561 |
| H241 | 0.587466571   | 0.757327336   | -0.567134497 |
| H242 | -2.568628665  | -4.234387682  | 9.694930819  |
| H243 | -1.954758543  | -3.174240555  | 8.613630359  |
| H244 | 3.783199586   | 1.608384193   | 4.526625984  |

|      |               |               |              |
|------|---------------|---------------|--------------|
| H245 | 2.471422459   | 3.709473565   | 3.008257702  |
| H246 | 3.343373961   | 3.455905416   | 6.428206274  |
| H247 | 3.805666815   | 4.402390569   | -0.213458438 |
| H248 | 4.870057470   | 5.299382792   | -1.964864990 |
| H249 | 4.431853644   | 5.821435053   | 0.168202658  |
| H250 | 4.650977434   | 3.590923722   | -3.582690424 |
| H251 | 4.540309552   | 4.904903761   | -4.785423256 |
| H252 | 7.084035275   | 6.103410218   | 7.564342036  |
| H253 | 7.473115778   | 7.830769608   | 7.779827169  |
| H254 | 7.218284736   | 5.290810145   | 5.431237433  |
| H255 | 7.125767135   | 6.319291208   | 4.013040014  |
| H256 | 9.838675027   | 5.295094492   | 1.931191590  |
| H257 | 7.427498715   | 2.330004698   | -0.299562960 |
| H258 | 5.334728571   | 9.959993521   | 1.235588937  |
| H259 | 2.132990615   | 7.844721245   | 4.405945016  |
| H260 | 6.517505849   | 6.386791006   | 1.456322568  |
| H261 | 5.585659557   | 0.499889190   | 3.055561042  |
| H262 | 5.837246674   | 1.005092289   | 5.456404622  |
| H263 | 5.223091148   | 2.120184124   | 1.173799116  |
| H264 | 1.832913598   | 5.758927947   | -5.630895051 |
| H265 | 8.008925927   | 1.509409688   | 7.810239721  |
| H266 | 2.736897714   | 3.150650461   | -5.116211684 |
| H267 | 7.325220233   | 0.791104795   | 3.001740269  |
| H268 | 3.157392267   | 6.494822937   | 2.613440217  |
| H269 | 5.210126197   | 7.943415442   | 0.112601506  |
| H270 | 6.795505210   | 2.705916099   | 8.308434638  |
| H271 | 9.640868019   | 3.780328466   | 1.113124266  |
| H272 | 8.156559088   | 6.898849191   | 1.520643564  |
| H273 | 1.511562738   | 1.054417083   | -6.730062652 |
| H274 | -0.507760719  | 2.409112828   | -5.700395225 |
| H275 | 4.395105514   | 11.292242207  | 3.108043414  |
| H276 | 2.572661844   | 4.341465476   | -2.492064474 |
| H277 | 7.007632989   | 3.143666624   | 3.739372889  |
| H278 | 8.271885461   | 2.293372605   | 1.256580374  |
| H279 | 6.210893759   | 0.720277869   | 0.796634959  |
| H280 | 6.104469465   | 4.307572323   | 0.627610200  |
| H281 | 1.452937482   | 5.611750507   | 7.041947379  |
| H282 | 4.615092271   | 5.924124529   | 6.407768546  |
| H283 | 5.383068516   | 7.257750399   | 8.890780020  |
| H284 | 2.090403703   | 4.380242926   | 8.156042387  |
| H285 | 3.714287493   | 8.362324949   | 6.099829437  |
| H286 | 6.725130891   | -8.171833773  | -1.129931648 |
| H287 | 5.441156638   | -8.765400308  | -2.195847686 |
| H288 | 1.391044877   | -10.494141437 | 0.435328729  |
| H289 | 7.259734245   | -10.132259489 | -2.704284228 |
| H290 | 7.383476849   | -8.977155421  | -3.864509547 |
| H291 | 2.495018673   | -1.440167655  | 6.987598789  |
| H292 | 2.389957962   | 0.821415765   | 9.122499083  |
| H293 | 6.375983082   | -0.147961114  | 7.782627779  |
| H294 | 2.333824659   | 0.309375738   | 6.654032387  |
| H295 | 3.424515166   | 0.046248209   | 10.120735069 |
| H296 | 6.798778928   | -3.890537789  | 4.025582037  |
| H297 | 4.490334484   | -1.070615131  | 8.341925491  |
| H298 | -7.709535320  | -5.951199025  | 0.196052091  |
| H299 | -6.402162256  | -8.722152512  | 0.053834068  |
| H300 | 6.476938245   | -4.131689750  | 1.642195954  |
| H301 | -3.150090788  | -2.270355921  | 4.089779759  |
| H302 | 8.082575128   | -2.072750769  | -0.783557170 |
| H303 | 2.813558805   | -2.222785057  | -3.874587183 |
| H304 | 6.648976040   | -1.370291781  | -0.027367465 |
| H305 | -5.880979605  | -4.086527335  | 0.855688647  |
| H306 | 5.657121320   | -3.777736656  | -0.246366283 |
| H307 | -4.600692885  | -4.998775072  | 0.058099919  |
| H308 | -6.320615220  | -6.442883713  | -0.793055336 |
| H309 | -5.094993716  | -6.997210290  | 1.444980447  |
| H310 | -6.409723357  | -6.137787694  | 2.269028518  |
| H311 | 5.610137255   | 0.935136767   | -6.005204729 |
| H312 | -9.056753154  | -7.777338495  | -0.971028671 |
| H313 | -8.789126538  | -8.978524910  | -3.796381143 |
| H314 | 3.193340688   | -1.905796382  | -1.435675317 |
| H315 | -11.049656038 | -9.009666484  | -1.953469284 |
| H316 | -10.830468948 | -8.138858162  | -3.323653101 |
| H317 | -3.289395511  | -4.995261812  | 2.013192003  |
| H318 | 4.742221145   | -0.159145544  | -0.641785225 |
| H319 | 4.080391910   | -0.841169062  | -5.518792900 |
| H320 | -3.788433916  | -11.774543421 | -2.184491891 |
| H321 | -0.514504499  | -10.817626938 | -1.941293373 |
| H322 | -4.143923867  | -9.521008432  | -1.331650317 |
| H323 | -3.008607139  | -12.011682614 | -3.495850257 |
| H324 | 9.010684160   | -5.455240882  | 2.624687888  |

|       |               |               |              |
|-------|---------------|---------------|--------------|
| H325  | -2.436572971  | -7.814778059  | 0.714899230  |
| H326  | -4.143906530  | -5.671368499  | -3.083569790 |
| H327  | 5.559103622   | -6.162999914  | -1.138181445 |
| H328  | -3.432859194  | -7.685728755  | -4.488405715 |
| H329  | 3.352012915   | -9.018854334  | -4.354670279 |
| H330  | 2.446521217   | -6.818817335  | -3.413860098 |
| H331  | -9.479017178  | -10.392695856 | -2.994713288 |
| H332  | -2.244722550  | -3.532075811  | 3.301408207  |
| H333  | -3.962349232  | -9.333577005  | 1.783250758  |
| H334  | -2.055458191  | -7.653562114  | 2.211351108  |
| H335  | -6.326928515  | -9.545322624  | 2.082740038  |
| H336  | -6.258067309  | -3.076091643  | 2.659774407  |
| H337  | -2.000705590  | -10.000218722 | -7.259139726 |
| H338  | -0.499255557  | -8.567071367  | -4.373887644 |
| H339  | -1.756895291  | -9.290785085  | -3.352995362 |
| H340  | -2.032860742  | -6.902600224  | -5.275324371 |
| H341  | 4.518609597   | -4.376229534  | -2.307023033 |
| H342  | 6.042968744   | 1.223709585   | -2.288893388 |
| H343  | 6.298878726   | 1.969112202   | -4.730723500 |
| H344  | -2.840338330  | -4.709406798  | -2.312888194 |
| H345  | -4.580606887  | -10.274848750 | 0.711449300  |
| H346  | -5.469019401  | -10.337871767 | -1.363632833 |
| H347  | -5.373838721  | -1.789181564  | 3.392566140  |
| H348  | 2.244403675   | -11.050486970 | -3.261191007 |
| H349  | -0.544273304  | -9.458346121  | -0.811148404 |
| H350  | 5.612937154   | -4.661924538  | -3.694668892 |
| H351  | 8.277859900   | -2.955340014  | 3.694074670  |
| H352  | -4.446708488  | -3.669529258  | 6.010983805  |
| H353  | -2.738962814  | -4.172276645  | 6.012973484  |
| H354  | 1.972700560   | -12.715054515 | -0.008697521 |
| H355  | 0.896801941   | -12.867564766 | -1.231251114 |
| H356  | -3.252905792  | -13.220105241 | 0.481090094  |
| H357  | -1.708089947  | -12.074750383 | -0.752192647 |
| H358  | -0.978370769  | -14.289178506 | 1.630115902  |
| H359  | -3.005355183  | -11.978328865 | 1.728772708  |
| H360  | -3.351909130  | -6.273788411  | 7.678788074  |
| H361  | 2.681061871   | 10.737412925  | 8.205951761  |
| H362  | -8.926233315  | -9.444941281  | 3.598545206  |
| H363  | -6.760509184  | -8.087868372  | 4.646259867  |
| H364  | 4.658229407   | 10.977285886  | 5.898546536  |
| H365  | 1.755522807   | 10.033874872  | 5.457311936  |
| H366  | 2.505888025   | 11.507605468  | 4.807156712  |
| H367  | 0.986178262   | -0.396469563  | 1.597073362  |
| H368  | -0.048074817  | -3.211985387  | -1.888787322 |
| H369  | -0.620022000  | -1.462549587  | 1.574102608  |
| H370  | -0.665780157  | -2.287204601  | 1.598764024  |
| Mo371 | 0.062479038   | -6.244653858  | -1.087714318 |
| N372  | -1.651540972  | 0.761601180   | -8.929786139 |
| N373  | -2.342883445  | 4.367585457   | -8.299736344 |
| N374  | -5.079043627  | 4.983477481   | -7.812942745 |
| N375  | -6.104956424  | 2.590185302   | -6.754399894 |
| N376  | -4.485266648  | 2.352570592   | -4.397053416 |
| N377  | -5.412694132  | 4.629230832   | -2.955573305 |
| N378  | -8.286019116  | 4.258437634   | -2.778269087 |
| N379  | -8.812473173  | 1.532286599   | -2.030532028 |
| N380  | -6.945658853  | 0.717433557   | -0.110695539 |
| N381  | -5.899585413  | 2.758590913   | 1.817227433  |
| N382  | -8.352904072  | 4.257692408   | 2.124474823  |
| N383  | -10.357738011 | -8.475939879  | -2.484062775 |
| N384  | -8.187275233  | -8.318592019  | -0.910214158 |
| N385  | -4.189620500  | -4.505081483  | 2.030713368  |
| N386  | -5.357457004  | -2.652013498  | 2.855493777  |
| N387  | -3.085592311  | -2.910011922  | 3.298305395  |
| N388  | -7.291127743  | -9.244180806  | 2.343887494  |
| N389  | 1.506021945   | 2.035248751   | -6.401299788 |
| N390  | 0.519265073   | -2.524839837  | -5.651656372 |
| N391  | 2.182000842   | 3.710444917   | -4.453931099 |
| N392  | 1.765576987   | 6.435553041   | -4.874851583 |
| N393  | -0.899659754  | 6.639908978   | -4.072705450 |
| N394  | -0.827086724  | 5.934556408   | -1.297228926 |
| N395  | 2.303011870   | 3.436559732   | -0.262301783 |
| N396  | 0.900188318   | 1.734006490   | -0.439247955 |
| N397  | 0.266308807   | 8.216365645   | -0.087844907 |
| N398  | 3.400201205   | 11.786789657  | -1.013353775 |
| N399  | 3.156590302   | 13.189612216  | 0.690643688  |
| N400  | -2.393517494  | -4.095731506  | 8.696579430  |
| N401  | 2.898701272   | -0.059900277  | 9.248169948  |
| N402  | 6.048045499   | 0.813647871   | 7.810419465  |
| N403  | 6.375467395   | 1.856799726   | 5.225339656  |
| N404  | 7.044116391   | 3.974416330   | 0.934791476  |

|      |               |               |              |
|------|---------------|---------------|--------------|
| N405 | 9.217187236   | 4.597231070   | 1.536916807  |
| N406 | 7.491152168   | 6.140747430   | 1.655052404  |
| N407 | 3.761025276   | 2.590668896   | 4.197550334  |
| N408 | 2.861927044   | 4.332177154   | 6.206249150  |
| N409 | 4.402766595   | 6.462935819   | 7.248068928  |
| N410 | 7.099777008   | 6.228571058   | 5.028429891  |
| N411 | 4.015293688   | 9.134207422   | 6.691293788  |
| N412 | 7.470089332   | -9.144203862  | -2.856834971 |
| N413 | 5.852331750   | -5.970729791  | -2.104290496 |
| N414 | 6.437383699   | -3.326581018  | -0.760303780 |
| N415 | 7.284767874   | -3.603001169  | 1.991277321  |
| N416 | 7.920138561   | -4.033772480  | -5.655393761 |
| N417 | 7.335247244   | -1.246498436  | -5.308395122 |
| N418 | 1.519000534   | -12.197783850 | -0.767265758 |
| N419 | 1.210174881   | -8.083759207  | -2.191728788 |
| N420 | 2.645061772   | -8.956662579  | -3.628081947 |
| N421 | -1.488101342  | -12.158483202 | 0.239751219  |
| O422 | -2.988345594  | 2.546953362   | -7.093513545 |
| O423 | -4.516727978  | 5.511629360   | -5.672482968 |
| O424 | -7.774246279  | 3.795239075   | -5.758504957 |
| O425 | -6.270999099  | 1.313909394   | -3.445521218 |
| O426 | -4.926864274  | 3.488675466   | -1.046638663 |
| O427 | -8.094919266  | 5.184135540   | -0.699473810 |
| O428 | -10.813019965 | 2.232219917   | -1.147398242 |
| O429 | -8.078467519  | -1.252559461  | 0.232626041  |
| O430 | -6.250675033  | 0.986623457   | 3.221524547  |
| O431 | -7.964216290  | 4.030529600   | 4.348631974  |
| O432 | -11.424980107 | 3.675108685   | 3.869213654  |
| O433 | -7.146294914  | -10.121375955 | -1.923900893 |
| O434 | -9.138838055  | -8.013509669  | 1.745894280  |
| O435 | -7.237697484  | -9.606627294  | 5.920941860  |
| O436 | 0.033258955   | 3.915835658   | -3.681548717 |
| O437 | 1.269384812   | -0.772833575  | -6.888505158 |
| O438 | 2.120735151   | 6.815576917   | -2.650573263 |
| O439 | 5.023340831   | 5.545117050   | -2.918626693 |
| O440 | -0.862250530  | 8.916184623   | -4.396106277 |
| O441 | -2.845215503  | 6.964909806   | -1.033063424 |
| O442 | -0.936297797  | 7.702308037   | 1.781024729  |
| O443 | -0.711414137  | 11.173304375  | 1.579345565  |
| O444 | -5.337995235  | -5.852683380  | 7.903115834  |
| O445 | -1.761072164  | 1.894377023   | 6.378413677  |
| O446 | 4.233578181   | 2.190087993   | 7.909378488  |
| O447 | 7.633443018   | 3.595027516   | 6.054476601  |
| O448 | 4.886507749   | 4.319392398   | 3.216491979  |
| O449 | 1.436739316   | 5.319643993   | 4.697530000  |
| O450 | 1.021779379   | 1.944865950   | 5.472720476  |
| O451 | 3.015595658   | 6.629035285   | 9.058759644  |
| O452 | 5.533798252   | 9.776286849   | 8.266243080  |
| O453 | 6.856557032   | 8.486057584   | 5.278927731  |
| O454 | 3.233401654   | 12.541736184  | 7.422503155  |
| O455 | 4.854286017   | 7.358386109   | 0.809166031  |
| O456 | 6.636454492   | -6.829283890  | -4.083674481 |
| O457 | 7.316971903   | -2.982944633  | -2.848397176 |
| O458 | 8.687614328   | -1.819795791  | 1.704505110  |
| O459 | 8.759208770   | -5.562054227  | 4.648186289  |
| O460 | 7.394129590   | -1.123892298  | -7.587017736 |
| O461 | 2.821452987   | -4.546625372  | -6.679868027 |
| O462 | 3.397845343   | -6.669644567  | -7.032063478 |
| O463 | 8.447976524   | 1.565931620   | -3.410694737 |
| O464 | -0.130873126  | -11.723765402 | 2.001685711  |
| O465 | -2.446583101  | -14.188363638 | 3.043659996  |
| O466 | -2.132324259  | -3.574539860  | -4.559132475 |
| O467 | -3.756858432  | -4.784623534  | -5.475404944 |
| O468 | -2.363431300  | -10.910505573 | -5.194425216 |
| O469 | -1.736051541  | -9.289581048  | -6.636911108 |
| O470 | -1.749022973  | -7.576256763  | -0.956925852 |
| O471 | -3.764532354  | -7.942002591  | -1.895080743 |
| O472 | -0.830210298  | -6.194569023  | -2.993511636 |
| O473 | -4.636626155  | -10.052492399 | 1.678563825  |
| O474 | -2.806003840  | -7.887876733  | 1.632506288  |
| O475 | 4.646354260   | 4.967598026   | -0.266843685 |
| O476 | -3.343774545  | -12.488205981 | -2.708560717 |
| O477 | -4.516953419  | -10.418871367 | -1.095614600 |
| S478 | 4.133640553   | -0.666004176  | 5.356044947  |
| S479 | 3.451520725   | -1.664510334  | 1.640309052  |
| S480 | 1.839286269   | -4.829973826  | -1.820783549 |
| S481 | 0.735365967   | -1.683678167  | 3.820560183  |
| S482 | 0.729577565   | -1.476816348  | -0.638438127 |
| S483 | 4.418627162   | -5.401934855  | 0.833874114  |
| S484 | -1.388447858  | -4.578400127  | -0.166041384 |

|                |                                           |               |               |              |
|----------------|-------------------------------------------|---------------|---------------|--------------|
|                | S485                                      | 3.117186112   | -4.246675550  | 4.199426981  |
|                | S486                                      | 1.007870728   | -7.203456145  | 0.883220277  |
|                | S487                                      | -0.740576391  | -5.150648329  | 3.568547518  |
| <b>7 (S=1)</b> | <b>bm202b2x6x2h2n0dtsxtconexbtc.car_2</b> |               |               |              |
| Fe(139) 2.067  | C1                                        | -2.781519586  | 5.601436828   | -7.549261962 |
| Fe(140) -0.100 | C2                                        | -3.193867172  | 5.878394869   | -6.100578212 |
| Fe(141) 2.397  | C3                                        | -3.416396433  | 7.557040314   | -4.318139805 |
| Fe(142) -2.752 | C4                                        | -4.855889227  | 7.284807336   | -3.883570422 |
| Fe(143) 3.180  | C5                                        | -7.206839272  | 7.099782923   | -4.514563143 |
| Fe(144) -2.463 | C6                                        | -7.459164997  | 5.632535122   | -4.142436034 |
| Fe(145) -0.705 | C7                                        | -6.736045593  | 3.309769767   | -4.452440770 |
|                | C8                                        | -6.050307229  | 3.004245981   | -3.117721556 |
|                | C9                                        | -4.173833714  | 3.437183858   | -1.621672992 |
|                | C10                                       | -5.006440281  | 3.870252032   | -0.407143946 |
|                | C11                                       | -6.566872722  | 5.478030852   | 0.541987488  |
|                | C12                                       | -7.861658278  | 4.673462088   | 0.726612595  |
|                | C13                                       | -9.941830266  | 3.890022014   | -0.287466534 |
|                | C14                                       | -10.042103380 | 2.360455616   | -0.246412845 |
|                | C15                                       | -9.131395763  | 0.227292997   | -1.058489082 |
|                | C16                                       | -8.083176115  | -0.548736951  | -0.255843925 |
|                | C17                                       | -5.892821228  | -0.470859472  | 0.867776366  |
|                | C18                                       | -5.866441155  | -0.249122954  | 2.387991812  |
|                | C19                                       | -4.551137057  | -0.067104879  | 0.188391936  |
|                | C20                                       | -3.314336804  | -0.494581374  | 0.986130871  |
|                | C21                                       | -4.487769638  | -0.610989463  | -1.243474322 |
|                | C22                                       | -6.113700860  | 1.410424347   | 4.220745395  |
|                | C23                                       | -7.586738959  | 1.426294869   | 4.674094237  |
|                | C24                                       | -5.385242923  | 2.746284369   | 4.501232013  |
|                | C25                                       | -5.606758194  | 3.210475859   | 5.945477712  |
|                | C26                                       | -3.888819916  | 2.614903904   | 4.199829464  |
|                | C27                                       | -9.845603119  | 2.240107916   | 4.319667730  |
|                | C28                                       | -10.469150065 | 0.868493223   | 4.483753165  |
|                | C29                                       | -8.875366650  | -8.050463430  | -5.977474682 |
|                | C30                                       | -7.676332255  | -8.361728392  | -5.082157291 |
|                | C31                                       | -6.771808239  | -7.964535625  | -2.782892430 |
|                | C32                                       | -7.354132912  | -8.904553428  | -1.708578615 |
|                | C33                                       | -6.431105981  | -6.577910934  | -2.208256137 |
|                | C34                                       | -5.384670376  | -6.601604152  | -1.091019084 |
|                | C35                                       | -4.883985165  | -5.187552019  | -0.796280897 |
|                | C36                                       | -3.824037966  | -4.339190135  | 1.307646102  |
|                | C37                                       | -6.939180176  | -10.890553697 | -0.332658790 |
|                | C38                                       | -6.142431117  | -10.794870331 | 0.950794181  |
|                | C39                                       | -0.091190339  | 4.236219356   | -4.070564876 |
|                | C40                                       | 0.216508880   | 5.098198034   | -2.836197684 |
|                | C41                                       | -0.039046899  | 2.755450101   | -3.630368526 |
|                | C42                                       | -0.690389971  | 1.741655835   | -4.593544438 |
|                | C43                                       | 0.238121681   | 1.170953604   | -5.661577853 |
|                | C44                                       | 2.079964353   | 6.153228824   | -1.609570133 |
|                | C45                                       | 1.628583648   | 7.582100486   | -1.287227245 |
|                | C46                                       | 3.619000949   | 6.093514728   | -1.677663806 |
|                | C47                                       | 0.048857591   | 9.383248840   | -1.824086863 |
|                | C48                                       | -1.215733231  | 9.158701177   | -0.979305020 |
|                | C49                                       | -2.808447995  | 7.524017081   | -0.066541259 |
|                | C50                                       | -2.560073160  | 6.879027895   | 1.300262126  |
|                | C51                                       | -1.172222033  | 5.433122886   | 2.708035598  |
|                | C52                                       | -0.945266662  | 6.403685083   | 3.877052265  |
|                | C53                                       | 0.087190809   | 4.554132322   | 2.616507395  |
|                | C54                                       | 0.058177917   | 3.567578981   | 1.497834640  |
|                | C55                                       | -0.956193462  | 2.907532472   | 0.832223217  |
|                | C56                                       | 0.871110408   | 2.225070798   | -0.075028811 |
|                | C57                                       | 0.211378400   | 8.458213962   | 4.560580996  |
|                | C58                                       | -0.987901676  | 8.851812450   | 5.423116810  |
|                | C59                                       | 0.768833869   | 9.695532802   | 3.820829350  |
|                | C60                                       | 1.588103286   | 10.662920307  | 4.624666697  |
|                | C61                                       | 1.519558297   | 11.030422656  | 5.954617481  |
|                | C62                                       | 3.135304799   | 12.146757148  | 4.928579569  |
|                | C63                                       | -2.831796060  | -7.371879640  | 5.479152394  |
|                | C64                                       | -3.312707214  | -8.607874147  | 4.743039873  |
|                | C65                                       | -2.899138983  | -6.192601475  | 4.474834115  |
|                | C66                                       | -2.499308197  | -4.872842779  | 5.091157809  |
|                | C67                                       | -3.450432916  | -4.014882353  | 5.673383535  |
|                | C68                                       | -1.153892056  | -4.463255318  | 5.096113509  |
|                | C69                                       | -3.075645144  | -2.785501971  | 6.228403277  |
|                | C70                                       | -0.762411887  | -3.248736735  | 5.660187460  |
|                | C71                                       | -1.728700543  | -2.405653339  | 6.216522692  |
|                | C72                                       | 4.330372434   | -3.441472515  | 7.133866934  |
|                | C73                                       | 5.114611289   | -2.184149113  | 7.528944528  |
|                | C74                                       | 3.531336493   | -3.187377664  | 5.846200042  |
|                | C75                                       | 7.323351649   | -1.105738739  | 7.633614136  |



|       |              |               |              |
|-------|--------------|---------------|--------------|
| C76   | 7.243481655  | 0.077220769   | 6.668496178  |
| C77   | 6.421962122  | 0.909864407   | 4.494208664  |
| C78   | 5.060117348  | 1.609509029   | 4.705558116  |
| C79   | 6.586948651  | 0.326031948   | 3.080241922  |
| C80   | 6.380024338  | 1.296962056   | 1.914990734  |
| C81   | 7.444634101  | 2.392281162   | 1.739904387  |
| C82   | 7.877520951  | 4.345563604   | 3.223376740  |
| C83   | 2.667133791  | 1.417811422   | 5.077231570  |
| C84   | 2.436721963  | 2.010673208   | 6.478309714  |
| C85   | 1.521264865  | 0.438966309   | 4.779860167  |
| C86   | 2.677536967  | 1.597102424   | 8.878687482  |
| C87   | 3.554788967  | 2.408316250   | 9.824594081  |
| C88   | 5.531922288  | 3.826963315   | 10.128703943 |
| C89   | 5.031267903  | 5.225740904   | 10.550209278 |
| C90   | 6.936764414  | 3.902550442   | 9.496778155  |
| C91   | 6.955381628  | 4.705771045   | 8.199888617  |
| C92   | 3.578293971  | 7.118430113   | 10.001904278 |
| C93   | 3.040024991  | 7.332439169   | 11.408779159 |
| C94   | 2.466447788  | 7.460698266   | 8.972417394  |
| C95   | 2.952652322  | 7.293306208   | 7.553642025  |
| C96   | 3.679634192  | 8.314190000   | 6.924147620  |
| C97   | 2.754681529  | 6.090109611   | 6.853850462  |
| C98   | 4.215572094  | 8.140232832   | 5.646760138  |
| C99   | 3.303767793  | 5.888828401   | 5.585301501  |
| C100  | 4.036672181  | 6.917433405   | 4.995727374  |
| C101  | 6.692767535  | -6.208284148  | -5.871151961 |
| C102  | 6.264198196  | -4.752000824  | -5.936785866 |
| C103  | 5.434222066  | -2.828187134  | -4.608223518 |
| C104  | 6.361538481  | -1.922214631  | -3.791702466 |
| C105  | 6.945801760  | -1.212972051  | -1.506007211 |
| C106  | 7.783967460  | -1.959687812  | -0.467960494 |
| C107  | 8.249002222  | -4.048454870  | 0.724987849  |
| C108  | 9.262452928  | -5.037145103  | 0.192250996  |
| C109  | 6.928198673  | -0.034392953  | -7.916305491 |
| C110  | 7.084411936  | 1.327849364   | -7.231917755 |
| C111  | 5.439549911  | -0.454714508  | -7.950229613 |
| C112  | 5.203609757  | -1.569007096  | -8.988727309 |
| C113  | 3.852177685  | -2.228509767  | -8.806062774 |
| C114  | 7.436768972  | 2.567489188   | -5.167024601 |
| C115  | 8.498417006  | 2.337014322   | -4.112890947 |
| C116  | 6.223344399  | 3.403270500   | -4.696963846 |
| C117  | 5.435983654  | 2.735819164   | -3.604579346 |
| C118  | 5.630938252  | 3.088185417   | -2.258320849 |
| C119  | 4.542608318  | 1.695979286   | -3.908498542 |
| C120  | 4.969877432  | 2.397760942   | -1.238592327 |
| C121  | 3.904509668  | 0.989237604   | -2.890191891 |
| C122  | 4.127733393  | 1.325520046   | -1.550302482 |
| C123  | 1.253378706  | -9.820654875  | -4.802522213 |
| C124  | 0.331876638  | -10.851669609 | -4.132720632 |
| C125  | 0.486175900  | -8.676597293  | -5.482756000 |
| C126  | 1.326023848  | -7.560524959  | -6.020888707 |
| C127  | 2.108399289  | -7.573231381  | -7.157926932 |
| C128  | 2.106473404  | -5.540315472  | -6.284628288 |
| C129  | -1.702796081 | -12.178350499 | -4.163552961 |
| C130  | -0.980621855 | -13.486641367 | -3.928586422 |
| C131  | -3.226747759 | -2.498785786  | -5.609836257 |
| C132  | -3.183059187 | -3.786773069  | -4.840099796 |
| C133  | -2.150385199 | -4.850299830  | -5.400857720 |
| C134  | -2.451251681 | -5.133370713  | -6.901061444 |
| C135  | -1.599635042 | -6.286921573  | -7.456008507 |
| C136  | -2.018976261 | -6.747390202  | -8.821706088 |
| C137  | -2.445846247 | -6.169943387  | -4.622074867 |
| C138  | 1.816014680  | -4.006153911  | -0.558948079 |
| Fe139 | 2.578889725  | -4.807520215  | -2.177007906 |
| Fe140 | 1.457903555  | -2.142543863  | 0.489464699  |
| Fe141 | 1.553572988  | -4.622413452  | 1.262775982  |
| Fe142 | 3.730023256  | -4.093103037  | -0.004533279 |
| Fe143 | 3.497471778  | -3.142519307  | 2.458104821  |
| Fe144 | 0.442510967  | -5.440312293  | -0.889866990 |
| Fe145 | 0.686817644  | -3.037858102  | -2.033521795 |
| H146  | -3.187875676 | 3.601976274   | -7.495582911 |
| H147  | -1.590540877 | 3.943918377   | -7.414677673 |
| H148  | -2.661525568 | 7.855199732   | -6.297162433 |
| H149  | -1.931777453 | 6.245835686   | -7.823962239 |
| H150  | -3.629553522 | 5.933159260   | -8.175063781 |
| H151  | -2.777964993 | 7.019180128   | -3.602610132 |
| H152  | -5.554514120 | 7.658246959   | -5.778721923 |
| H153  | -3.218411367 | 8.631985688   | -4.212802652 |
| H154  | -7.821987430 | 7.358767001   | -5.386611945 |
| H155  | -5.932796052 | 5.051176366   | -5.381324634 |

|      |               |               |              |
|------|---------------|---------------|--------------|
| H156 | -7.542314003  | 7.706496069   | -3.662823631 |
| H157 | -3.912312181  | 2.381541183   | -1.471035688 |
| H158 | -4.430040597  | 4.182313434   | -3.625928576 |
| H159 | -6.246410757  | 2.738791605   | -5.252812057 |
| H160 | -6.020058900  | 5.423669773   | 1.491622873  |
| H161 | -5.645974537  | 5.568702126   | -1.403813308 |
| H162 | -7.773826588  | 2.967283165   | -4.366180479 |
| H163 | -3.236508424  | 4.012056840   | -1.652744188 |
| H164 | -8.312689476  | 4.844473699   | -1.290168119 |
| H165 | -6.830865455  | 6.527610408   | 0.351144060  |
| H166 | -5.338058149  | -0.270143434  | -1.851802276 |
| H167 | -3.560089224  | -0.277346202  | -1.733068842 |
| H168 | -4.475937122  | -1.712393764  | -1.244432551 |
| H169 | -4.548511531  | 1.033984313   | 0.154684060  |
| H170 | -10.531618545 | 4.238781328   | -1.147581219 |
| H171 | -3.705341402  | 2.331499549   | 3.153813125  |
| H172 | -8.139594913  | 2.755618168   | 3.154944110  |
| H173 | -6.669819355  | 3.370890440   | 6.177786633  |
| H174 | -2.410990012  | -0.092026469  | 0.504404358  |
| H175 | -3.204988183  | -1.587811419  | 1.025777987  |
| H176 | -3.552954840  | -7.167814337  | 6.293864700  |
| H177 | -3.383897289  | 3.572401870   | 4.392576599  |
| H178 | -5.078144403  | 4.160004030   | 6.113959102  |
| H179 | -3.425694416  | 1.855453525   | 4.850694681  |
| H180 | -5.210474594  | 2.470430996   | 6.658828212  |
| H181 | -5.813275680  | 3.509541318   | 3.825478197  |
| H182 | -5.640718179  | 0.609591386   | 4.805150325  |
| H183 | -6.031184998  | 1.778006120   | 2.112232464  |
| H184 | -3.329555661  | -0.118220899  | 2.019694586  |
| H185 | 1.718724695   | -0.083767175  | 3.827185259  |
| H186 | 0.603432709   | 1.035810564   | 4.666360840  |
| H187 | 0.437805029   | -0.594180277  | 6.065812800  |
| H188 | -2.064291720  | -0.667372020  | 7.015117690  |
| H189 | 0.280220598   | -2.932295980  | 5.621807193  |
| H190 | -0.396891247  | -5.083412747  | 4.609866783  |
| H191 | -4.505569741  | -4.301649830  | 5.683183097  |
| H192 | -6.920138269  | 1.129572286   | -0.109924872 |
| H193 | -9.007087598  | -0.065382503  | -2.113162947 |
| H194 | -10.115197751 | -0.123965912  | -0.723923013 |
| H195 | -8.384922383  | 2.176950020   | -1.482904564 |
| H196 | -10.425648750 | 4.250827520   | 0.629526539  |
| H197 | -3.831220296  | -2.124077760  | 6.662160358  |
| H198 | -6.051656034  | -1.549794493  | 0.747173569  |
| H199 | -9.998092452  | 2.815067548   | 5.247656020  |
| H200 | -10.392512299 | 2.747570104   | 3.509882304  |
| H201 | -9.994804028  | 0.061585194   | 3.877214640  |
| H202 | -6.867297001  | -11.915363762 | -0.727239422 |
| H203 | 0.662377104   | -0.568640138  | -6.646314537 |
| H204 | -4.613564300  | -3.280721385  | -6.702131890 |
| H205 | 5.236113788   | -1.133167420  | -9.997147814 |
| H206 | 5.996451499   | -2.327122879  | -8.910141425 |
| H207 | 4.811690351   | 0.412753603   | -8.209518209 |
| H208 | 9.112766434   | 1.417876735   | -4.263979851 |
| H209 | 7.234227416   | 0.163114709   | -8.955345695 |
| H210 | 1.015583139   | 2.484180191   | -3.456729533 |
| H211 | -1.546626878  | 2.206029682   | -5.113888819 |
| H212 | 7.090069484   | 0.454290798   | -5.340883538 |
| H213 | 7.952575162   | 3.194608215   | -5.923974998 |
| H214 | 7.590809271   | -1.306383478  | -6.420595013 |
| H215 | -0.610878738  | -0.724748951  | -5.457926075 |
| H216 | 5.132114927   | -0.780194402  | -6.944534119 |
| H217 | 7.872133020   | -1.856798761  | -7.939350157 |
| H218 | 0.537656660   | 5.248643023   | -5.764174764 |
| H219 | -0.546674369  | 2.672297010   | -2.658882741 |
| H220 | 4.742734062   | -3.534930054  | -7.642188328 |
| H221 | -1.109143521  | 0.912977785   | -4.004816457 |
| H222 | -2.051029546  | 4.827186145   | 2.971499429  |
| H223 | -2.027912542  | 2.985273927   | 1.003251955  |
| H224 | -3.376997410  | 8.443275784   | 0.117213474  |
| H225 | -1.111798349  | 7.107968870   | -1.297734701 |
| H226 | -0.014063801  | 7.679418087   | 2.572538725  |
| H227 | 0.884939368   | 10.701420919  | 6.769833130  |
| H228 | -1.948493901  | 8.906724739   | 4.857520558  |
| H229 | -0.070866326  | 10.221043508  | 3.329968549  |
| H230 | 0.982592431   | 8.010973394   | 5.208638223  |
| H231 | 3.959828086   | 12.842203318  | 4.790400089  |
| H232 | 0.199880355   | 4.050593892   | 3.591403895  |
| H233 | 0.967456749   | 5.209219726   | 2.502712920  |
| H234 | 2.738435537   | 12.446621487  | 6.998117630  |
| H235 | 1.416005483   | 9.334291875   | 3.005270808  |

|      |               |              |              |
|------|---------------|--------------|--------------|
| H236 | -0.921693388  | 5.814074048  | 0.619721508  |
| H237 | -3.450410780  | 6.851224838  | -0.655330248 |
| H238 | 0.697031543   | 10.065782274 | -1.260705718 |
| H239 | 1.608541514   | 1.715668143  | -0.688465423 |
| H240 | -0.247871864  | 9.889632163  | -2.752734722 |
| H241 | -1.466785064  | -8.192089257 | 6.767948773  |
| H242 | -1.041555347  | -6.710018711 | 6.224129631  |
| H243 | 4.061110222   | -0.221015764 | 4.778819828  |
| H244 | 2.590079651   | 2.263003043  | 4.376808858  |
| H245 | 3.645467699   | 0.574081141  | 7.310476059  |
| H246 | 2.169924634   | 3.372039828  | 1.173925108  |
| H247 | 4.485970627   | 5.447122762  | 0.938089410  |
| H248 | 4.333062126   | 5.529945258  | 2.499210806  |
| H249 | 3.932640301   | 5.058888973  | -1.873677491 |
| H250 | 3.979425235   | 6.734801081  | -2.501535882 |
| H251 | 7.309084979   | 2.878620225  | 9.348293164  |
| H252 | 7.591164039   | 4.408745953  | 10.220264600 |
| H253 | 7.263605694   | 2.963856117  | 7.059402082  |
| H254 | 7.021896923   | 4.457861976  | 6.168788242  |
| H255 | 9.740179135   | 4.568991226  | 4.044431145  |
| H256 | 7.586851052   | 2.614077836  | 0.670619420  |
| H257 | 4.774681654   | 8.946576952  | 5.164932459  |
| H258 | 2.154281100   | 5.285866183  | 7.287263739  |
| H259 | 6.380795924   | 5.608785794  | 3.849027997  |
| H260 | 5.873322420   | -0.502672463 | 2.953768174  |
| H261 | 6.198634434   | -1.057349511 | 5.301362661  |
| H262 | 5.380893771   | 1.757973977  | 1.972905162  |
| H263 | 0.553350456   | 7.665623406  | -3.005524471 |
| H264 | 8.365895412   | -1.450569397 | 7.652070949  |
| H265 | 2.035463588   | 5.315443881  | -3.635528250 |
| H266 | 7.594326091   | -0.116234993 | 3.012781194  |
| H267 | 3.171341215   | 4.935425713  | 5.072224609  |
| H268 | 3.646075821   | 7.256024707  | -0.116205332 |
| H269 | 7.087899670   | -0.704728081 | 8.628967311  |
| H270 | 9.678048509   | 3.517676789  | 2.672501770  |
| H271 | 7.983214378   | 6.122009402  | 4.218745265  |
| H272 | 1.023957740   | 3.647015887  | -5.695322669 |
| H273 | -1.137820012  | 4.467654828  | -4.342615375 |
| H274 | 3.833368341   | 9.266233821  | 7.436852414  |
| H275 | 1.756701469   | 5.555719434  | -0.739152498 |
| H276 | 7.173844663   | 1.689122048  | 4.674705577  |
| H277 | 8.410991197   | 2.037607126  | 2.123110954  |
| H278 | 6.387531050   | 0.691204602  | 0.999035347  |
| H279 | 6.148424484   | 4.049884606  | 2.214942380  |
| H280 | 1.692350838   | 2.087526963  | 8.865251756  |
| H281 | 4.807574474   | 2.935407597  | 8.289363424  |
| H282 | 5.616792684   | 3.268325708  | 11.072549627 |
| H283 | 2.552742815   | 0.604338756  | 9.334702968  |
| H284 | 3.737236535   | 5.252181914  | 8.974623911  |
| H285 | 7.182675130   | -6.409900124 | -4.907803527 |
| H286 | 5.752290553   | -6.797198307 | -5.881711853 |
| H287 | 1.863029221   | -9.400485217 | -3.989439233 |
| H288 | 7.696849822   | -7.536640113 | -7.047616284 |
| H289 | 7.180885369   | -6.201794327 | -7.844035025 |
| H290 | 3.050049095   | -4.127846194 | 5.546249977  |
| H291 | 2.833245296   | -3.056216219 | 8.459913374  |
| H292 | 6.863777109   | -3.058831203 | 6.899013222  |
| H293 | 2.755903146   | -2.433048550 | 6.036620274  |
| H294 | 3.934128606   | -4.121549773 | 9.028889527  |
| H295 | 7.516415894   | -4.576243482 | 1.356769032  |
| H296 | 5.037424369   | -4.266296460 | 6.952630598  |
| H297 | -7.362367240  | -6.105912831 | -1.851425203 |
| H298 | -5.869901382  | -8.408332054 | -3.222078309 |
| H299 | 6.795304689   | -3.750759677 | -0.805663354 |
| H300 | -2.641630753  | -3.728480163 | 2.843377010  |
| H301 | 7.623223302   | -0.555919701 | -2.063879137 |
| H302 | 3.227020593   | 0.165776785  | -3.120936636 |
| H303 | 6.243343077   | -0.580902039 | -0.939696632 |
| H304 | -5.717543453  | -4.538935241 | -0.495239446 |
| H305 | 5.480037830   | -2.672074492 | -2.110650258 |
| H306 | -4.453238392  | -4.747479049 | -1.711272903 |
| H307 | -6.059254529  | -5.973809703 | -3.051543992 |
| H308 | -4.522212308  | -7.217671441 | -1.386956358 |
| H309 | -5.804403079  | -7.042016222 | -0.172141348 |
| H310 | 5.596975238   | 3.584059031  | -5.583125645 |
| H311 | -8.640574289  | -7.347088038 | -3.656416562 |
| H312 | -8.528602111  | -7.297924571 | -6.702813298 |
| H313 | 3.652304629   | 0.733429659  | -0.764439502 |
| H314 | -10.626383989 | -8.272842698 | -4.917787719 |
| H315 | -10.601297243 | -6.935168457 | -5.863388441 |

|       |               |               |               |
|-------|---------------|---------------|---------------|
| H316  | -2.931809686  | -5.528475026  | -0.043872236  |
| H317  | 5.123219020   | 2.687415460   | -0.196977219  |
| H318  | 4.358151154   | 1.428584945   | -4.951948075  |
| H319  | -3.372879350  | -10.057409390 | -6.657634119  |
| H320  | -0.101775566  | -9.088136625  | -6.322865930  |
| H321  | -3.745028702  | -8.429784646  | -4.891882875  |
| H322  | -2.750322146  | -9.616916689  | -8.001528048  |
| H323  | 9.555075496   | -4.886998080  | -0.875830100  |
| H324  | -1.942008471  | -7.542057756  | -2.418316207  |
| H325  | -4.179468452  | -4.253317604  | -4.813847953  |
| H326  | 5.963348826   | -4.735934187  | -3.899385582  |
| H327  | -3.517619914  | -5.390307859  | -7.005708080  |
| H328  | 3.168889008   | -5.940080330  | -8.062855865  |
| H329  | 2.317125806   | -4.484141714  | -6.167838062  |
| H330  | -9.085056303  | -8.969643922  | -6.551167690  |
| H331  | -1.784102879  | -4.520988714  | 1.554275694   |
| H332  | -3.264170491  | -9.492999593  | -1.989817656  |
| H333  | -1.462578348  | -7.884279309  | -0.979172424  |
| H334  | -5.573515448  | -9.988653045  | -1.730480168  |
| H335  | -5.859206469  | -4.136821323  | 1.445924278   |
| H336  | -2.258075770  | -6.158680060  | -10.602595719 |
| H337  | -0.548150850  | -5.965502682  | -7.491614537  |
| H338  | -1.657799447  | -7.163086312  | -6.800387738  |
| H339  | -2.253463006  | -4.221803722  | -7.483940840  |
| H340  | 4.445051992   | -2.908637144  | -4.129571601  |
| H341  | 6.324747331   | 3.897195685   | -2.015839159  |
| H342  | 6.609250239   | 4.375357328   | -4.356555195  |
| H343  | -2.854961531  | -3.562525740  | -3.816658745  |
| H344  | -3.906998151  | -9.974881958  | -3.324790776  |
| H345  | -4.999060837  | -9.303117927  | -5.185925735  |
| H346  | -4.988516887  | -2.994510833  | 2.411165150   |
| H347  | 2.345621799   | -8.367425294  | -7.857103601  |
| H348  | -0.227807175  | -8.252832081  | -4.764994132  |
| H349  | 5.319674982   | -2.391472641  | -5.603853350  |
| H350  | 8.787931660   | -3.328924408  | 1.364482110   |
| H351  | -3.930762851  | -6.133207169  | 4.097050142   |
| H352  | -2.236272257  | -6.423199069  | 3.624437057   |
| H353  | 2.712269597   | -11.195635626 | -5.236957424  |
| H354  | 1.618778662   | -11.010879449 | -6.440988136  |
| H355  | -2.520574535  | -12.377008915 | -4.874355429  |
| H356  | -1.169624937  | -10.671677428 | -5.576633933  |
| H357  | -0.104723865  | -13.668837640 | -4.595981832  |
| H358  | -2.158527394  | -11.833079501 | -3.221646496  |
| H359  | -2.535038045  | -9.092975197  | 4.105241874   |
| H360  | 2.667120792   | 6.411170742   | 11.913833510  |
| H361  | -7.995572470  | -10.694177203 | -0.079526142  |
| H362  | -5.688114068  | -9.793938317  | 1.149453419   |
| H363  | 4.425799762   | 7.808722826   | 9.854025107   |
| H364  | 1.591150784   | 6.819491607   | 9.156885461   |
| H365  | 2.163565608   | 8.501327446   | 9.158701694   |
| H366  | -0.380682163  | -2.079413183  | -2.538031583  |
| H367  | 4.919238339   | 7.526853660   | 3.372734650   |
| H368  | -0.061332135  | -1.650366352  | 0.705533046   |
| H369  | -0.164289685  | -2.358703601  | 0.247242315   |
| H370  | 1.446808525   | -0.736163738  | 1.082942224   |
| H371  | 0.432321619   | -0.265228165  | -1.450080991  |
| Mo372 | 0.264817604   | -5.196211550  | -3.594952161  |
| N373  | -2.463697744  | 4.220683185   | -7.869878838  |
| N374  | -3.107340800  | 7.172695123   | -5.688430571  |
| N375  | -5.817261222  | 7.388507307   | -4.834223454  |
| N376  | -6.706950878  | 4.719873642   | -4.807139793  |
| N377  | -4.868078295  | 3.625305605   | -2.888512415  |
| N378  | -5.725001882  | 5.012437147   | -0.548994114  |
| N379  | -8.608876260  | 4.464218985   | -0.387764059  |
| N380  | -9.097415218  | 1.673913652   | -0.945254251  |
| N381  | -7.025179387  | 0.168998336   | 0.212935534   |
| N382  | -6.011636910  | 1.033364667   | 2.810486486   |
| N383  | -8.449452077  | 2.167525891   | 3.931870544   |
| N384  | -10.027987404 | -7.511121435  | -5.245340883  |
| N385  | -7.752458308  | -7.821415968  | -3.851804610  |
| N386  | -3.843479802  | -5.155547703  | 0.239201674   |
| N387  | -4.966358980  | -3.836676204  | 1.822081396   |
| N388  | -2.645374880  | -4.022721739  | 1.868371817   |
| N389  | -6.531490022  | -9.910810801  | -1.321660849  |
| N390  | 0.872222869   | 4.509392387   | -5.142630335  |
| N391  | 0.094389895   | -0.144487611  | -5.915843944  |
| N392  | 1.486205937   | 5.579041636   | -2.802871806  |
| N393  | 0.781909240   | 8.176188401   | -2.156258300  |
| N394  | -1.628119461  | 7.868473352   | -0.840176827  |
| N395  | -1.410894468  | 6.147979588   | 1.451926381   |

|      |               |               |              |
|------|---------------|---------------|--------------|
| N396 | 1.222070471   | 3.123126107   | 0.893027072  |
| N397 | -0.443047015  | 2.078372872   | -0.144531135 |
| N398 | -0.236670574  | 7.513586263   | 3.551543668  |
| N399 | 2.604014824   | 11.366810439  | 3.995208997  |
| N400 | 2.510724415   | 11.974499703  | 6.127470871  |
| N401 | -1.458422385  | -7.599112990  | 5.934650458  |
| N402 | 3.401569319   | -3.866442368  | 8.192096348  |
| N403 | 6.463453624   | -2.234149242  | 7.338140722  |
| N404 | 6.649809027   | -0.144705370  | 5.479467766  |
| N405 | 7.088145325   | 3.647209760   | 2.418242058  |
| N406 | 9.179662462   | 4.031972941   | 3.390986381  |
| N407 | 7.363230468   | 5.352689624   | 3.975930162  |
| N408 | 3.979751535   | 0.806314667   | 4.901065274  |
| N409 | 3.134928267   | 1.440760844   | 7.506114870  |
| N410 | 4.595832008   | 3.100059853   | 9.273847322  |
| N411 | 7.091782814   | 3.977221104   | 7.065211516  |
| N412 | 4.009863515   | 5.741095269   | 9.824767759  |
| N413 | 7.611343602   | -6.520645985  | -6.970681834 |
| N414 | 5.992783034   | -4.165789489  | -4.755945670 |
| N415 | 6.195252329   | -2.007538657  | -2.458051548 |
| N416 | 7.580555820   | -3.295753889  | -0.321549761 |
| N417 | 7.875113605   | -1.011956634  | -7.362869648 |
| N418 | 7.125606751   | 1.334747750   | -5.868947202 |
| N419 | 2.167678093   | -10.493515528 | -5.746442750 |
| N420 | 1.341974497   | -6.276332832  | -5.481829516 |
| N421 | 2.590801157   | -6.291313275  | -7.304262605 |
| N422 | -0.834821034  | -11.175231285 | -4.756689693 |
| O423 | -3.642136955  | 4.984010390   | -5.357711458 |
| O424 | -5.111153379  | 6.993252965   | -2.704894121 |
| O425 | -8.321357286  | 5.325833013   | -3.303133941 |
| O426 | -6.569529387  | 2.238283892   | -2.287617780 |
| O427 | -4.997328080  | 3.218320923   | 0.649737341  |
| O428 | -8.217097991  | 4.285534227   | 1.853265285  |
| O429 | -10.981840651 | 1.826545894   | 0.358544634  |
| O430 | -8.218653808  | -1.769389187  | -0.092350965 |
| O431 | -5.695316052  | -1.209968249  | 3.163604642  |
| O432 | -7.969951160  | 0.785582566   | 5.666979669  |
| O433 | -11.459987342 | 0.661621250   | 5.168295662  |
| O434 | -6.729207338  | -9.042566584  | -5.530113430 |
| O435 | -8.499948584  | -8.722945292  | -1.260394655 |
| O436 | -6.004525914  | -11.723650559 | 1.731664144  |
| O437 | -0.628014733  | 5.324944080   | -1.943270232 |
| O438 | 1.071865230   | 1.878757758   | -6.270922508 |
| O439 | 2.029672500   | 8.128129254   | -0.238808497 |
| O440 | 4.206118614   | 6.502255724   | -0.434387148 |
| O441 | -1.801485102  | 10.136141851  | -0.495227435 |
| O442 | -3.371303415  | 7.026771421   | 2.219926871  |
| O443 | -1.295144889  | 6.140484314   | 5.033241883  |
| O444 | -0.921749727  | 9.152593954   | 6.603650528  |
| O445 | -4.451658276  | -9.048762409  | 4.808204054  |
| O446 | -1.296507722  | -1.193773384  | 6.726045779  |
| O447 | 4.559141051   | -1.176685979  | 8.005616067  |
| O448 | 7.752433206   | 1.166133349   | 7.009806957  |
| O449 | 4.984744023   | 2.849834153   | 4.698818810  |
| O450 | 1.611968679   | 2.921301827   | 6.636354753  |
| O451 | 1.386341035   | -0.504431056  | 5.847319418  |
| O452 | 3.292533676   | 2.448395865   | 11.033904418 |
| O453 | 5.534963193   | 5.816486922   | 11.516715324 |
| O454 | 6.813049322   | 5.940408609   | 8.202236933  |
| O455 | 2.963509046   | 8.433104435   | 11.931965187 |
| O456 | 4.609555613   | 6.677519383   | 3.741179193  |
| O457 | 6.144852380   | -4.174294321  | -7.047379154 |
| O458 | 7.196386606   | -1.170167920  | -4.346186536 |
| O459 | 8.592027703   | -1.311124776  | 0.217829588  |
| O460 | 9.748517002   | -5.930039822  | 0.869854467  |
| O461 | 7.155622293   | 2.375031862   | -7.898862845 |
| O462 | 2.818679236   | -1.824699925  | -9.323571353 |
| O463 | 3.824511436   | -3.306165844  | -7.988347425 |
| O464 | 8.728474445   | 3.107866486   | -3.192660512 |
| O465 | 0.679963412   | -11.451932920 | -3.098646950 |
| O466 | -1.354610492  | -14.329489113 | -3.125523883 |
| O467 | -2.540897260  | -1.508909503  | -5.397110790 |
| O468 | -4.127143959  | -2.436095832  | -6.646206143 |
| O469 | -2.377750899  | -7.886788076  | -9.114715398 |
| O470 | -1.963640010  | -5.761527783  | -9.755299427 |
| O471 | -1.475173331  | -6.620285059  | -3.901987538 |
| O472 | -3.552587931  | -6.746345499  | -4.761909635 |
| O473 | -0.852557055  | -4.429171689  | -5.215278442 |
| O474 | -3.896675416  | -10.166373049 | -2.349192196 |
| O475 | -2.220153058  | -8.000145256  | -1.583781952 |

|                |      |              |                                  |              |
|----------------|------|--------------|----------------------------------|--------------|
|                | O476 | 4.608226821  | 4.931499573                      | 1.774376111  |
|                | O477 | -2.963897057 | -10.420387975                    | -7.483285314 |
|                | O478 | -4.022786505 | -9.383491761                     | -5.029377664 |
|                | S479 | 4.578741486  | -2.583945667                     | 4.446026871  |
|                | S480 | 3.931848421  | -1.942712639                     | 0.629259539  |
|                | S481 | 1.860225812  | -3.447006563                     | -3.825714694 |
|                | S482 | 1.204915351  | -2.860067573                     | 2.635773796  |
|                | S483 | 1.538166309  | -1.058462788                     | -1.495289379 |
|                | S484 | 4.794212010  | -4.911039624                     | -1.788776132 |
|                | S485 | -1.158153248 | -4.259102959                     | -1.911597728 |
|                | S486 | 3.653807210  | -5.340043375                     | 1.848966345  |
|                | S487 | 1.509835661  | -6.798211920                     | -2.317070221 |
|                | S488 | -0.141617731 | -6.086085826                     | 1.151548133  |
| <b>8 (S=1)</b> |      |              | <b>bm12b2x6x6h2nconexa.car_3</b> |              |
| Fe(139) 2.413  | C1   | -7.639273961 | -4.558159494                     | -4.230009419 |
| Fe(140) -1.479 | C2   | -7.723630696 | -3.879097783                     | -2.857486049 |
| Fe(141) 2.822  | C3   | -9.028346981 | -2.397986131                     | -1.385609892 |
| Fe(142) -2.394 | C4   | -9.014461088 | -3.227919907                     | -0.103664445 |
| Fe(143) 2.861  | C5   | -9.522743365 | -5.362895513                     | 0.973982369  |
| Fe(144) -2.417 | C6   | -8.113675649 | -5.791697045                     | 1.396599541  |
| Fe(145) -0.162 | C7   | -5.814052944 | -6.217107969                     | 0.673269967  |
|                | C8   | -5.072727279 | -5.041161302                     | 1.317184647  |
|                | C9   | -4.711634426 | -2.629195234                     | 1.390329974  |
|                | C10  | -5.157639803 | -2.388043256                     | 2.841588297  |
|                | C11  | -6.963655289 | -2.371656461                     | 4.461004558  |
|                | C12  | -6.528153270 | -3.449871841                     | 5.463675384  |
|                | C13  | -6.460301274 | -5.846240077                     | 5.969993359  |
|                | C14  | -5.037773723 | -6.402152836                     | 6.096897316  |
|                | C15  | -2.909620682 | -6.868312512                     | 4.953639774  |
|                | C16  | -1.768131632 | -5.851685178                     | 5.013583006  |
|                | C17  | -1.161082434 | -3.478706287                     | 4.886115888  |
|                | C18  | -1.211597855 | -2.477554256                     | 6.041351294  |
|                | C19  | -1.200054796 | -2.780598578                     | 3.493817958  |
|                | C20  | -0.277505556 | -1.556487129                     | 3.415327588  |
|                | C21  | -0.853157430 | -3.777244839                     | 2.379971816  |
|                | C22  | -2.509552071 | -0.770098080                     | 7.249909190  |
|                | C23  | -2.955784271 | -1.416947459                     | 8.57202305   |
|                | C24  | -3.432639429 | 0.387624326                      | 6.803486513  |
|                | C25  | -3.623667498 | 1.411283796                      | 7.927930311  |
|                | C26  | -2.872137629 | 1.080203711                      | 5.555263518  |
|                | C27  | -4.455141170 | -2.966878641                     | 9.690863614  |
|                | C28  | -3.366740707 | -3.757274523                     | 10.395406548 |
|                | C29  | 3.622539652  | -12.799615482                    | 1.826063051  |
|                | C30  | 4.453609966  | -11.518270831                    | 1.783962766  |
|                | C31  | 4.777281345  | -9.334864057                     | 2.959853621  |
|                | C32  | 5.689835534  | -9.384826655                     | 4.200572783  |
|                | C33  | 3.674584433  | -8.272645594                     | 3.116857324  |
|                | C34  | 4.207258256  | -6.846711760                     | 3.267743956  |
|                | C35  | 3.077575828  | -5.826436780                     | 3.131156933  |
|                | C36  | 3.130994195  | -3.459698511                     | 3.968658207  |
|                | C37  | 7.913340769  | -8.852856427                     | 5.086358611  |
|                | C38  | 8.171834179  | -7.478215807                     | 5.667340227  |
|                | C39  | -4.808136952 | -1.045877706                     | -3.414156222 |
|                | C40  | -5.137073523 | 0.289710063                      | -2.735287953 |
|                | C41  | -3.347487352 | -1.401230245                     | -3.047096452 |
|                | C42  | -2.960471425 | -2.892434813                     | -3.126207758 |
|                | C43  | -2.535541694 | -3.399686099                     | -4.498328713 |
|                | C44  | -5.152599380 | 2.742090104                      | -3.046085463 |
|                | C45  | -6.407161819 | 3.070471329                      | -2.233231067 |
|                | C46  | -4.967345270 | 3.707516707                      | -4.246466133 |
|                | C47  | -8.784226035 | 2.597628193                      | -1.854192547 |
|                | C48  | -8.755467998 | 2.040492787                      | -0.424562859 |
|                | C49  | -7.518689008 | 0.723205046                      | 1.238679787  |
|                | C50  | -6.409215796 | 1.418139616                      | 2.037739555  |
|                | C51  | -4.711070498 | 3.181798011                      | 2.114235203  |
|                | C52  | -5.518610302 | 4.233773407                      | 2.893525385  |
|                | C53  | -3.791615783 | 3.997072717                      | 1.185614939  |
|                | C54  | -2.690128296 | 3.278767388                      | 0.476810187  |
|                | C55  | -1.744558304 | 2.394469182                      | 0.954939492  |
|                | C56  | -1.319032879 | 2.877807509                      | -1.157254161 |
|                | C57  | -7.127527471 | 6.051825678                      | 2.609048113  |
|                | C58  | -7.684135036 | 5.847363560                      | 4.016676166  |
|                | C59  | -8.268284434 | 6.386714613                      | 1.620774778  |
|                | C60  | -8.791227164 | 7.792966103                      | 1.648509400  |
|                | C61  | -8.885338142 | 8.708752831                      | 2.677917576  |
|                | C62  | -9.690970404 | 9.571111548                      | 0.801579941  |
|                | C63  | 7.071412969  | -0.997638819                     | 6.496095186  |
|                | C64  | 8.001670973  | -2.189823022                     | 6.374083364  |
|                | C65  | 5.824513726  | -1.300034572                     | 5.629697928  |

|       |              |              |               |
|-------|--------------|--------------|---------------|
| C66   | 4.773407806  | -0.218759295 | 5.735430108   |
| C67   | 3.848367508  | -0.206241421 | 6.797593651   |
| C68   | 4.684867921  | 0.802676710  | 4.771699222   |
| C69   | 2.868338522  | 0.785691912  | 6.897045654   |
| C70   | 3.713935049  | 1.801141598  | 4.859146894   |
| C71   | 2.804700044  | 1.789973872  | 5.922269973   |
| C72   | 5.793610926  | 6.252996323  | 2.732017674   |
| C73   | 4.938496621  | 7.486614439  | 2.415113380   |
| C74   | 5.035359880  | 4.971464357  | 2.351321244   |
| C75   | 4.626746876  | 9.428043037  | 0.937050999   |
| C76   | 3.315812782  | 9.178433142  | 0.188389767   |
| C77   | 1.855699655  | 7.513662949  | -0.906636768  |
| C78   | 0.824112503  | 7.022542565  | 0.132305815   |
| C79   | 2.163812098  | 6.466271350  | -1.992227167  |
| C80   | 0.975324270  | 5.857259234  | -2.743640391  |
| C81   | 0.231517159  | 6.769640683  | -3.733003129  |
| C82   | -1.059929284 | 8.809106644  | -3.100287502  |
| C83   | 0.339724383  | 5.687999249  | 2.107089463   |
| C84   | 0.009740379  | 6.698177753  | 3.221706203   |
| C85   | 0.817429812  | 4.385803592  | 2.765204486   |
| C86   | 0.953119978  | 8.332901163  | 4.777752126   |
| C87   | 0.599100000  | 9.815614350  | 4.772885930   |
| C88   | -0.172671604 | 11.764932716 | 3.492039004   |
| C89   | -1.586500444 | 12.162733943 | 3.965531835   |
| C90   | 0.086029009  | 12.284135020 | 2.062056794   |
| C91   | -0.850964071 | 11.644432825 | 1.041928261   |
| C92   | -3.878369924 | 11.418968008 | 4.387985877   |
| C93   | -4.062022281 | 12.061125389 | 5.756554599   |
| C94   | -4.699344379 | 10.103579845 | 4.318848248   |
| C95   | -4.635695763 | 9.463736351  | 2.949914728   |
| C96   | -5.502353244 | 9.876297161  | 1.926083546   |
| C97   | -3.670835233 | 8.488293554  | 2.648748091   |
| C98   | -5.405686661 | 9.343687931  | 0.638264982   |
| C99   | -3.540642165 | 7.964121038  | 1.359707771   |
| C100  | -4.415935849 | 8.397000763  | 0.364720151   |
| C101  | 6.779471024  | -1.596041765 | -8.227294132  |
| C102  | 5.290276973  | -1.292643351 | -8.179766402  |
| C103  | 3.479922320  | -0.237660956 | -6.853147934  |
| C104  | 3.179481927  | 1.262772624  | -6.976884597  |
| C105  | 3.513546146  | 3.461455204  | -5.943288536  |
| C106  | 4.702308652  | 4.325123757  | -5.531236188  |
| C107  | 6.861381558  | 4.511731423  | -4.391395810  |
| C108  | 8.131087775  | 4.408842530  | -5.206407663  |
| C109  | 0.547878599  | -0.292732389 | -10.402816744 |
| C110  | -0.594825286 | 0.677947175  | -10.084036940 |
| C111  | 0.532792310  | -1.475711248 | -9.403739848  |
| C112  | 1.328452007  | -2.669396999 | -9.963716749  |
| C113  | 1.598846042  | -3.712808843 | -8.900862214  |
| C114  | -1.382107647 | 2.588698206  | -8.774494831  |
| C115  | -0.810348510 | 3.991560455  | -8.705943117  |
| C116  | -2.225123472 | 2.171330336  | -7.544385115  |
| C117  | -1.338758498 | 1.789102390  | -6.390352255  |
| C118  | -0.774239026 | 2.774844509  | -5.564851683  |
| C119  | -0.940036264 | 0.451751846  | -6.219137714  |
| C120  | 0.231494402  | 2.437683579  | -4.655266707  |
| C121  | 0.060393913  | 0.115389478  | -5.302025864  |
| C122  | 0.676890567  | 1.118589940  | -4.549807497  |
| C123  | 8.479765961  | -5.605232912 | -3.775562548  |
| C124  | 9.309441637  | -6.226333479 | -2.638768680  |
| C125  | 7.088323105  | -6.241536824 | -3.922131438  |
| C126  | 6.142509317  | -5.563162244 | -4.866564347  |
| C127  | 6.101609857  | -5.698486488 | -6.239808387  |
| C128  | 4.396265651  | -4.457164639 | -5.576410278  |
| C129  | 9.921803276  | -8.161335190 | -1.296936666  |
| C130  | 11.408477305 | -7.971909473 | -1.502811433  |
| C131  | 0.194825890  | -6.810626097 | -1.779916166  |
| C132  | 1.566548051  | -6.717814383 | -1.171272528  |
| C133  | 2.738649540  | -6.698728008 | -2.236715721  |
| C134  | 2.612963521  | -7.933321416 | -3.178382293  |
| C135  | 3.809775786  | -8.058533025 | -4.137013180  |
| C136  | 3.863188207  | -9.375447509 | -4.856910026  |
| C137  | 4.063219267  | -6.895234722 | -1.438305186  |
| C138  | 4.082057481  | -0.541860417 | -1.265666014  |
| Fe139 | 4.735069647  | -1.370682159 | -2.890885818  |
| Fe140 | 2.575881986  | 0.902192058  | -0.913705986  |
| Fe141 | 4.869376646  | 0.205778773  | 0.389176844   |
| Fe142 | 4.907895169  | 1.036477877  | -2.069485764  |
| Fe143 | 4.310411090  | 2.801049544  | -0.182783569  |
| Fe144 | 4.956394730  | -2.194265881 | -0.489558104  |
| Fe145 | 2.366946208  | -2.167691673 | -1.245246419  |

|      |               |              |               |
|------|---------------|--------------|---------------|
| H146 | -5.861875798  | -5.496370815 | -3.897255006  |
| H147 | -5.720690663  | -4.168400147 | -4.843546717  |
| H148 | -9.518466415  | -3.020724500 | -3.371557720  |
| H149 | -8.080655973  | -3.898225063 | -4.993447871  |
| H150 | -8.300315421  | -5.442947512 | -4.177490870  |
| H151 | -8.232150122  | -1.648046677 | -1.277476262  |
| H152 | -9.922044752  | -4.799377624 | -1.064150944  |
| H153 | -9.990349124  | -1.870571488 | -1.445044927  |
| H154 | -10.105635094 | -6.259927841 | 0.726869744   |
| H155 | -7.452279121  | -5.588145223 | -0.534700265  |
| H156 | -9.985680099  | -4.880472147 | 1.844964507   |
| H157 | -3.616786358  | -2.710163470 | 1.403970468   |
| H158 | -5.886089226  | -3.720316537 | -0.049689548  |
| H159 | -5.320069048  | -6.494446290 | -0.268108058  |
| H160 | -6.606691586  | -1.406207048 | 4.843983307   |
| H161 | -7.128597858  | -2.810661368 | 2.357306201   |
| H162 | -5.734452066  | -7.062255767 | 1.367269345   |
| H163 | -4.981751185  | -1.758788264 | 0.774422559   |
| H164 | -7.057403122  | -4.943382110 | 4.128349471   |
| H165 | -8.061981138  | -2.351275499 | 4.427264818   |
| H166 | -1.513621777  | -4.656709970 | 2.389103298   |
| H167 | -0.954951029  | -3.293558817 | 1.394337304   |
| H168 | 0.188733707   | -4.126176491 | 2.475248921   |
| H169 | -2.232719532  | -2.431066283 | 3.343241630   |
| H170 | -7.109295774  | -6.674953892 | 5.653474277   |
| H171 | -2.797370153  | 0.404199522  | 4.692286200   |
| H172 | -4.465382762  | -2.496499344 | 7.615917997   |
| H173 | -4.054365518  | 0.967329467  | 8.836624661   |
| H174 | -0.425051446  | -1.048030789 | 2.449611904   |
| H175 | 0.783604902   | -1.840685841 | 3.463627125   |
| H176 | 6.742300296   | -0.946509809 | 7.552178608   |
| H177 | -3.524748302  | 1.918365595  | 5.269990167   |
| H178 | -4.296076281  | 2.213239261  | 7.590595489   |
| H179 | -1.868694532  | 1.486819272  | 5.761883247   |
| H180 | -2.659325763  | 1.867812573  | 8.202738981   |
| H181 | -4.420697973  | -0.041345488 | 6.557235512   |
| H182 | -1.506462134  | -0.368108148 | 7.451789731   |
| H183 | -3.106449927  | -1.867610014 | 5.496448977   |
| H184 | -0.469452608  | -0.818943333 | 4.208780412   |
| H185 | 1.185557890   | 3.696808295  | 1.984304364   |
| H186 | -0.059148327  | 3.929881709  | 3.251456584   |
| H187 | 1.755841222   | 4.013726512  | 4.451888392   |
| H188 | 1.259818546   | 2.664696054  | 6.713139112   |
| H189 | 3.636813657   | 2.563426201  | 4.083458899   |
| H190 | 5.359137426   | 0.796069501  | 3.911598741   |
| H191 | 3.880161802   | -0.995870410 | 7.553232361   |
| H192 | -3.123499773  | -4.336343374 | 4.823560628   |
| H193 | -2.766821798  | -7.450467545 | 4.031474615   |
| H194 | -2.790096163  | -7.555060770 | 5.802457572   |
| H195 | -4.627145858  | -5.949590489 | 4.106726186   |
| H196 | -6.761363339  | -5.541885451 | 6.979332696   |
| H197 | 2.145439509   | 0.767071968  | 7.716541784   |
| H198 | -0.188127456  | -3.971805195 | 4.994013155   |
| H199 | -4.891198748  | -2.251998910 | 10.405983366  |
| H200 | -5.242473887  | -3.678537795 | 9.392912798   |
| H201 | -2.533872537  | -4.090461932 | 9.732881595   |
| H202 | 8.865299562   | -9.288960178 | 4.747710387   |
| H203 | -1.177243958  | -4.631209258 | -5.397161197  |
| H204 | 0.295815135   | -8.722736865 | -1.543121912  |
| H205 | 0.742858695   | -3.146374669 | -10.762787612 |
| H206 | 2.278003992   | -2.319513433 | -10.394003304 |
| H207 | -0.503699128  | -1.794120011 | -9.211559655  |
| H208 | 0.112572263   | 4.144365394  | -9.315474555  |
| H209 | 0.266643228   | -0.700018174 | -11.386231844 |
| H210 | -2.670558339  | -0.794397794 | -3.670202127  |
| H211 | -3.811686239  | -3.516029377 | -2.800657459  |
| H212 | 0.551691127   | 1.657631362  | -8.658788086  |
| H213 | -2.067948223  | 2.621822896  | -9.644862741  |
| H214 | 2.210381610   | 0.702686197  | -9.664648152  |
| H215 | -0.6797182700 | -4.541500480 | -3.661677910  |
| H216 | 0.947523219   | -1.139135888 | -8.441235205  |
| H217 | 2.513456457   | -0.226538811 | -10.986002990 |
| H218 | -5.963079547  | -1.152077999 | -5.121102802  |
| H219 | -3.185276926  | -1.086632715 | -2.006034502  |
| H220 | 3.366233007   | -2.881386339 | -8.654400893  |
| H221 | -2.151001005  | -3.081419701 | -2.406391728  |
| H222 | -4.135662616  | 2.604720508  | 2.849567446   |
| H223 | -1.5992260694 | 1.940454217  | 1.930108048   |
| H224 | -8.446567111  | 0.881432001  | 1.803791613   |
| H225 | -7.006262079  | 0.983158945  | -0.809086390  |



|      |               |              |               |
|------|---------------|--------------|---------------|
| H226 | -6.663523732  | 4.517529169  | 1.202723683   |
| H227 | -8.585957206  | 8.668148553  | 3.719221076   |
| H228 | -8.098850205  | 4.826376665  | 4.193785024   |
| H229 | -9.092573047  | 5.664446593  | 1.763494460   |
| H230 | -6.395301846  | 6.875444588  | 2.638998731   |
| H231 | -10.139195298 | 10.298901073 | 0.129622249   |
| H232 | -3.358627005  | 4.797126814  | 1.810095393   |
| H233 | -4.411520112  | 4.494027453  | 0.424738765   |
| H234 | -9.660823087  | 10.701856124 | 2.606014058   |
| H235 | -7.886017541  | 6.212694128  | 0.602000147   |
| H236 | -5.751367289  | 2.471919436  | 0.382681812   |
| H237 | -7.322337388  | -0.358629959 | 1.238057100   |
| H238 | -9.054694351  | 3.658942213  | -1.762377852  |
| H239 | -0.814972793  | 2.862509642  | -2.119352175  |
| H240 | -9.592466876  | 2.097041517  | -2.403383246  |
| H241 | 0.045327329   | 1.697804748  | -0.101308835  |
| H242 | 8.419378972   | 0.530809795  | 6.723271417   |
| H243 | 7.074559817   | 0.958280143  | 5.895004355   |
| H244 | 2.230985409   | 5.786492549  | 1.047967852   |
| H245 | -0.613245845  | 5.480998522  | 1.599169132   |
| H246 | 1.885505765   | 7.518963049  | 3.070135650   |
| H247 | -2.822520620  | 5.022846891  | -1.677541695  |
| H248 | -4.276574188  | 5.300783109  | -3.287558515  |
| H249 | -3.551217227  | 6.431276635  | -1.518176840  |
| H250 | -4.006733440  | 3.440576357  | -4.727542237  |
| H251 | -5.772183179  | 3.523025076  | -4.976481427  |
| H252 | 1.142389946   | 12.110174495 | 1.809665869   |
| H253 | -0.100814837  | 13.366695501 | 2.065595338   |
| H254 | 0.698310452   | 10.437670867 | 0.280500961   |
| H255 | -0.913886887  | 10.129070208 | -0.335068004  |
| H256 | -0.400962460  | 10.651740609 | -3.701166493  |
| H257 | -0.171192140  | 6.167179410  | -4.561437944  |
| H258 | -6.097875819  | 9.666780545  | -0.142981435  |
| H259 | -3.002409999  | 8.109378465  | 3.426313001   |
| H260 | -2.684629037  | 8.737392263  | -1.835676299  |
| H261 | 2.718869160   | 5.635370274  | -1.528797100  |
| H262 | 3.774341708   | 7.180900599  | -0.028459952  |
| H263 | 0.253578206   | 5.408510933  | -2.043637494  |
| H264 | -7.513164217  | 1.782192066  | -3.378082880  |
| H265 | 5.276742287   | 10.030970243 | 0.288790179   |
| H266 | -4.905461554  | 1.149387950  | -4.528451455  |
| H267 | 2.848992255   | 6.934662064  | -2.718223407  |
| H268 | -2.746884954  | 7.252527242  | 1.128343084   |
| H269 | -5.028197567  | 8.111385141  | -1.463322585  |
| H270 | 4.364349147   | 10.038564810 | 1.812337382   |
| H271 | 0.304410225   | 9.327346060  | -4.554895458  |
| H272 | -2.413979898  | 10.250285493 | -2.612271545  |
| H273 | -4.398785966  | -1.681836227 | -5.314113737  |
| H274 | -5.463765266  | -1.789243423 | -2.922350675  |
| H275 | -6.271566914  | 10.622573328 | 2.136660881   |
| H276 | -4.315033841  | 2.883457191  | -2.343289165  |
| H277 | 1.406464320   | 8.409899573  | -1.354034909  |
| H278 | 0.936921918   | 7.482218865  | -4.178630578  |
| H279 | 1.387552137   | 5.021160168  | -3.326271818  |
| H280 | -1.636393529  | 6.903741010  | -2.691669608  |
| H281 | 0.221664653   | 7.841374022  | 5.437523736   |
| H282 | 0.137312425   | 9.746194381  | 2.774170600   |
| H283 | 0.512142610   | 12.289390762 | 4.174362423   |
| H284 | 1.944692240   | 8.243403351  | 5.243714257   |
| H285 | -2.188823716  | 10.216654773 | 3.853267374   |
| H286 | 7.347430007   | -0.745836949 | -7.820519990  |
| H287 | 6.931242573   | -2.444954427 | -7.528182900  |
| H288 | 8.355785288   | -4.547306501 | -3.501616652  |
| H289 | 8.102509832   | -2.353462733 | -9.583647813  |
| H290 | 6.532189254   | -2.520773456 | -10.017647210 |
| H291 | 5.702532266   | 4.115516353  | 2.515565200   |
| H292 | 5.301201348   | 6.268996571  | 4.709711607   |
| H293 | 6.150587055   | 7.933617993  | 0.816966766   |
| H294 | 4.147192075   | 4.867997771  | 2.990937630   |
| H295 | 6.726138354   | 7.005795762  | 4.397095219   |
| H296 | 7.066576793   | 4.218544974  | -3.349355809  |
| H297 | 6.723913907   | 6.298757839  | 2.144594775   |
| H298 | 3.046738334   | -8.542365544 | 3.982988447   |
| H299 | 5.371911137   | -9.111515571 | 2.065642028   |
| H300 | 5.726307791   | 2.734424015  | -4.667731960  |
| H301 | 3.332068496   | -1.466852355 | 4.325476777   |
| H302 | 3.190947379   | 3.796724167  | -6.936136099  |
| H303 | 0.368096761   | -0.925940886 | -5.176796510  |
| H304 | 2.700187122   | 3.705230741  | -5.239400432  |
| H305 | 2.315931418   | -5.971681255 | 3.908435873   |

|       |              |               |              |
|-------|--------------|---------------|--------------|
| H306  | 4.156370986  | 1.526294786   | -5.201095242 |
| H307  | 2.566950730  | -5.966900371  | 2.163905247  |
| H308  | 3.039922970  | -8.336681983  | 2.218101472  |
| H309  | 4.955029156  | -6.636949035  | 2.487695769  |
| H310  | 4.702674052  | -6.710817770  | 4.242260538  |
| H311  | -2.858800578 | 1.324330788   | -7.844724140 |
| H312  | 3.473304420  | -10.980801875 | 3.440166370  |
| H313  | 2.932011309  | -12.743404857 | 0.970384211  |
| H314  | 1.485204924  | 0.886259837   | -3.859067975 |
| H315  | 3.392778702  | -13.473145953 | 3.759013697  |
| H316  | 2.007175765  | -13.511585964 | 2.885989978  |
| H317  | 4.102894660  | -4.146591570  | 2.349784100  |
| H318  | 0.692791173  | 3.201248711   | -4.026565291 |
| H319  | -1.409082535 | -0.326531186  | -6.827169025 |
| H320  | 7.002493331  | -10.103429539 | -2.110404288 |
| H321  | 7.212188518  | -7.282467554  | -4.269591844 |
| H322  | 5.740212523  | -8.683065168  | -0.624485379 |
| H323  | 6.488611745  | -10.394719470 | -3.538948180 |
| H324  | 8.000405496  | 3.985413141   | -6.232084924 |
| H325  | 5.922261094  | -5.621439431  | -0.045386801 |
| H326  | 1.739699970  | -7.546880918  | -0.468718847 |
| H327  | 5.539030681  | -0.285705828  | -6.399141765 |
| H328  | 2.549534107  | -8.838696902  | -2.554091047 |
| H329  | 4.631134325  | -4.923643795  | -7.611939630 |
| H330  | 3.487295502  | -3.869921988  | -5.625035552 |
| H331  | 4.316839571  | -13.631478362 | 1.614541533  |
| H332  | 3.975019939  | -1.978493105  | 2.802756032  |
| H333  | 7.386079216  | -6.890034422  | 1.328720162  |
| H334  | 6.577628928  | -4.461438300  | 0.745079870  |
| H335  | 7.201298394  | -8.470323233  | 3.093075482  |
| H336  | 2.342775579  | -4.685468674  | 5.427704251  |
| H337  | 2.921480133  | -10.450903277 | -6.097855695 |
| H338  | 3.762261315  | -7.244201824  | -4.874361878 |
| H339  | 4.755833299  | -7.966243734  | -3.592237564 |
| H340  | 1.685323662  | -7.844434808  | -3.761495528 |
| H341  | 3.249145104  | -0.589049849  | -5.835305456 |
| H342  | -1.098688933 | 3.813031363   | -5.670466403 |
| H343  | -2.880893008 | 3.018835751   | -7.291974347 |
| H344  | 1.631995946  | -5.762352544  | -0.634664177 |
| H345  | 7.407834474  | -8.346318332  | 0.782489082  |
| H346  | 6.139560533  | -10.032923422 | 0.028879068  |
| H347  | 1.952922036  | -3.012438149  | 5.615804263  |
| H348  | 6.744135710  | -6.241490947  | -6.923827040 |
| H349  | 6.614364488  | -6.278201439  | -2.932993966 |
| H350  | 2.854454988  | -0.765549261  | -7.576744271 |
| H351  | 6.549580408  | 5.570005187   | -4.386155168 |
| H352  | 5.410276363  | -2.262973795  | 5.966881819  |
| H353  | 6.139380017  | -1.416060101  | 4.579964031  |
| H354  | 10.115178308 | -5.151196527  | -4.923465428 |
| H355  | 9.484764330  | -6.624214458  | -5.252803702 |
| H356  | 9.725391051  | -9.245214575  | -1.319251365 |
| H357  | 8.404115501  | -8.103489818  | -2.792662548 |
| H358  | 11.717643737 | -7.808205125  | -2.562992165 |
| H359  | 9.632592373  | -7.792464434  | -0.299870876 |
| H360  | 8.688945661  | -2.149207624  | 5.494717072  |
| H361  | -3.227405548 | 11.886696324  | 6.475717244  |
| H362  | 7.530456827  | -9.480227839  | 5.910370995  |
| H363  | 7.345080550  | -6.740167879  | 5.527231491  |
| H364  | -4.270921290 | 12.123171109  | 3.635579070  |
| H365  | -4.331344070 | 9.405439270   | 5.086916495  |
| H366  | -5.736118851 | 10.358813382  | 4.581457143  |
| H367  | 1.436069726  | 1.881508025   | -0.680766119 |
| H368  | 0.082069661  | -0.552482436  | -0.622747208 |
| H369  | 1.222820198  | -3.148172820  | -1.353459893 |
| H370  | 1.602076170  | -2.176534867  | 0.164362306  |
| H371  | 2.203797415  | -1.573071155  | 0.272170150  |
| Mo372 | 4.128508348  | -4.017684634  | -2.386765775 |
| N373  | -6.315241179 | -4.979750864  | -4.654854128 |
| N374  | -8.861272864 | -3.172290309  | -2.610136251 |
| N375  | -9.540931001 | -4.476248430  | -0.178303998 |
| N376  | -7.213082490 | -5.936927378  | 0.392787313  |
| N377  | -5.313733845 | -3.813876385  | 0.791259633  |
| N378  | -6.470780605 | -2.591601499  | 3.110093166  |
| N379  | -6.661226879 | -4.738009510  | 5.049941194  |
| N380  | -4.253624457 | -6.319965592  | 4.986122181  |
| N381  | -2.140500731 | -4.543263710  | 4.990720341  |
| N382  | -2.364862350 | -1.772833620  | 6.193614959  |
| N383  | -3.972683547 | -2.313328914  | 8.491559519  |
| N384  | 2.847297229  | -12.958955545 | 3.063567081  |
| N385  | 4.168044969  | -10.642893932 | 2.765642770  |

|      |              |               |               |
|------|--------------|---------------|---------------|
| N386 | 3.570051413  | -4.445940213  | 3.172219493   |
| N387 | 2.485127222  | -3.728457534  | 5.122985947   |
| N388 | 3.328874338  | -2.182756173  | 3.599356449   |
| N389 | 6.927320100  | -8.857871559  | 4.022933085   |
| N390 | -4.989954732 | -0.961987539  | -4.867623320  |
| N391 | -1.471459119 | -4.228120789  | -4.510263877  |
| N392 | -5.141259733 | 1.369945588   | -3.551702748  |
| N393 | -7.555043578 | 2.452111822   | -2.614101126  |
| N394 | -7.735416377 | 1.195080846   | -0.115899731  |
| N395 | -5.589762985 | 2.281565915   | 1.372018406   |
| N396 | -2.413226233 | 3.572472601   | -0.849558709  |
| N397 | -0.894885977 | 2.148695425   | -0.100644846  |
| N398 | -6.508945662 | 4.815377920   | 2.165073104   |
| N399 | -9.299147787 | 8.343771853   | 0.481843255   |
| N400 | -9.456751567 | 9.833769234   | 2.118757329   |
| N401 | 7.756309715  | 0.203984559   | 6.016511878   |
| N402 | 6.159544762  | 6.187644492   | 4.154813236   |
| N403 | 5.353852329  | 8.249435263   | 1.364012818   |
| N404 | 3.109326686  | 7.930523064   | -0.279976679  |
| N405 | -0.894515179 | 7.491591822   | -3.129878238  |
| N406 | -0.238869485 | 9.651830082   | -3.762447632  |
| N407 | -2.029391188 | 9.354297149   | -2.323225698  |
| N408 | 1.278993192  | 6.193216555   | 1.110855215   |
| N409 | 0.961691386  | 7.638387236   | 3.498554364   |
| N410 | 0.112635813  | 10.336627944  | 3.606774542   |
| N411 | -0.307650616 | 10.647220796  | 0.300247939   |
| N412 | -2.472869846 | 11.152077745  | 4.132681976   |
| N413 | 7.203354834  | -1.867664330  | -9.602958300  |
| N414 | 4.875301085  | -0.541739868  | -7.142882767  |
| N415 | 3.707250579  | 2.024390532   | -5.996297504  |
| N416 | 5.767551531  | 3.725849562   | -4.936684225  |
| N417 | 1.826278600  | 0.406982131   | -10.571290112 |
| N418 | -0.345752470 | 1.641354533   | -9.152912648  |
| N419 | 9.230606413  | -5.652642047  | -5.045416518  |
| N420 | 5.062217958  | -4.775293985  | -4.468400985  |
| N421 | 4.998415111  | -4.991876751  | -6.665469621  |
| N422 | 9.140981611  | -7.549119859  | -2.359804724  |
| O423 | -6.833811905 | -4.010542203  | -1.995362991  |
| O424 | -8.553124619 | -2.757318527  | 0.948195994   |
| O425 | -7.847274254 | -6.017211187  | 2.588538297   |
| O426 | -4.304891494 | -5.208092265  | 2.279108249   |
| O427 | -4.355935335 | -2.016381580  | 3.713945218   |
| O428 | -6.129602783 | -3.146345805  | 6.601580163   |
| O429 | -4.673190973 | -6.931534257  | 7.155743548   |
| O430 | -0.593464643 | -6.246855983  | 5.061937784   |
| O431 | -0.210971554 | -2.304746443  | 6.759290276   |
| O432 | -2.412208544 | -1.136165918  | 9.653067158   |
| O433 | -3.405512616 | -4.058490316  | 11.578423746  |
| O434 | 5.287553017  | -11.355585556 | 0.868161144   |
| O435 | 5.283800872  | -9.876284655  | 5.267900757   |
| O436 | 9.195110001  | -7.186109968  | 6.265892128   |
| O437 | -5.365614202 | 0.357227595   | -1.509577422  |
| O438 | -3.144254112 | -3.091478233  | -5.547404659  |
| O439 | -6.366750982 | 3.854112756   | -1.268340662  |
| O440 | -5.029902947 | 5.073600123   | -3.897562179  |
| O441 | -9.656020589 | 2.362718197   | 0.364943823   |
| O442 | -6.306227004 | 1.192291808   | 3.250175636   |
| O443 | -5.233993525 | 4.598339632   | 4.040678099   |
| O444 | -7.751900477 | 6.720527020   | 4.867284355   |
| O445 | 8.003788597  | -3.140130861  | 7.144466811   |
| O446 | 1.851320392  | 2.787746324   | 5.948317146   |
| O447 | 3.931634956  | 7.786968642   | 3.082638794   |
| O448 | 2.525966597  | 10.132772025  | 0.028172165   |
| O449 | -0.359196537 | 7.392430121   | 0.058050255   |
| O450 | -1.055590233 | 6.599226582   | 3.846602489   |
| O451 | 1.842047871  | 4.662691015   | 3.725286090   |
| O452 | 0.724070760  | 10.485370734  | 5.806676634   |
| O453 | -1.871052820 | 13.349054988  | 4.183018157   |
| O454 | -2.043092427 | 11.981764513  | 0.954200952   |
| O455 | -5.065505386 | 12.680464933  | 6.072763735   |
| O456 | -4.251203576 | 7.868971413   | -0.923486049  |
| O457 | 4.516721247  | -1.770738086  | -9.049351820  |
| O458 | 2.503650199  | 1.718997718   | -7.924804301  |
| O459 | 4.632486361  | 5.551446882   | -5.721529003  |
| O460 | 9.223037372  | 4.766310901   | -4.792882220  |
| O461 | -1.699582822 | 0.567122389   | -10.642665712 |
| O462 | 0.791463438  | -4.566541209  | -8.559742109  |
| O463 | 2.809911726  | -3.642690148  | -8.296056709  |
| O464 | -1.319259060 | 4.917565395   | -8.091678668  |
| O465 | 10.180046308 | -5.561732643  | -2.045948619  |

|                  |                                           |               |               |              |
|------------------|-------------------------------------------|---------------|---------------|--------------|
|                  | O466                                      | 12.232483861  | -8.067880421  | -0.604749019 |
|                  | O467                                      | -0.478134491  | -5.869239722  | -2.173224291 |
|                  | O468                                      | -0.333102303  | -8.071797645  | -1.908972578 |
|                  | O469                                      | 4.749166066   | -10.218738978 | -4.740304605 |
|                  | O470                                      | 2.803586325   | -9.567963092  | -5.686684114 |
|                  | O471                                      | 4.953064539   | -5.966520086  | -1.589992896 |
|                  | O472                                      | 4.235546921   | -7.929731169  | -0.753985961 |
|                  | O473                                      | 2.739648417   | -5.512561567  | -2.936830284 |
|                  | O474                                      | 7.758558668   | -7.786208635  | 1.525545411  |
|                  | O475                                      | 6.370456883   | -5.414201971  | 0.811933414  |
|                  | O476                                      | -3.062525554  | 5.881498503   | -2.170040920 |
|                  | O477                                      | 7.289586414   | -10.476829882 | -2.981632861 |
|                  | O478                                      | 6.532461331   | -9.281425035  | -0.486157287 |
|                  | S479                                      | 4.473478802   | 4.967540165   | 0.586689490  |
|                  | S480                                      | 3.305313467   | 2.625206102   | -2.170656815 |
|                  | S481                                      | 2.794160096   | -2.415642868  | -3.484681832 |
|                  | S482                                      | 3.102448012   | 1.417065317   | 1.213210499  |
|                  | S483                                      | 0.906670122   | -0.492062911  | -1.703557697 |
|                  | S484                                      | 5.683870419   | 0.301338883   | -4.045469015 |
|                  | S485                                      | 3.434125475   | -3.823250829  | -0.178189980 |
|                  | S486                                      | 6.317263263   | 1.750236832   | -0.495307254 |
|                  | S487                                      | 6.242419079   | -2.894629340  | -2.192198689 |
|                  | S488                                      | 5.749622079   | -1.544765828  | 1.473947847  |
| <b>9 (S=3/2)</b> | <b>bm22b2n2x6x2h2ndhtikaconextd.car_3</b> |               |               |              |
| Fe(139) 2.362    | C1                                        | -3.225011379  | -6.106882126  | -6.420302098 |
| Fe(140) 0.054    | C2                                        | -3.079233239  | -7.602458854  | -6.117959853 |
| Fe(141) 2.806    | C3                                        | -2.995371174  | -4.344692407  | -8.116341835 |
| Fe(142) -2.670   | C4                                        | -4.339717315  | -3.634208018  | -7.967955438 |
| Fe(143) 3.214    | C5                                        | -6.774019821  | -3.799713782  | -8.013917716 |
| Fe(144) -2.298   | C6                                        | -7.101179683  | -3.374941665  | -6.577970887 |
| Fe(145) -1.078   | C7                                        | -6.723105990  | -3.800531521  | -4.193131581 |
|                  | C8                                        | -5.871818428  | -2.593627574  | -3.790768624 |
|                  | C9                                        | -3.742556795  | -1.426212511  | -3.976314171 |
|                  | C10                                       | -4.275342093  | -0.100336499  | -4.536266272 |
|                  | C11                                       | -5.415765197  | 1.059560185   | -6.342682925 |
|                  | C12                                       | -6.751292658  | 1.506574380   | -5.728498966 |
|                  | C13                                       | -9.070604297  | 0.879699792   | -5.244005564 |
|                  | C14                                       | -9.401802978  | 0.937537348   | -3.750553367 |
|                  | C15                                       | -8.922606205  | 0.081133772   | -1.502327289 |
|                  | C16                                       | -7.963761183  | 0.855186043   | -0.595925370 |
|                  | C17                                       | -5.749099650  | 1.940537667   | -0.477641962 |
|                  | C18                                       | -5.516031635  | 3.415771023   | -0.834693695 |
|                  | C19                                       | -4.459822103  | 1.076649249   | -0.623736633 |
|                  | C20                                       | -3.204923593  | 1.757400753   | -0.062954487 |
|                  | C21                                       | -4.647271035  | -0.303378029  | 0.014899369  |
|                  | C22                                       | -5.114048937  | 5.055647513   | -2.645834636 |
|                  | C23                                       | -6.481879265  | 5.737246487   | -2.867147502 |
|                  | C24                                       | -4.208707330  | 5.084590836   | -3.900153275 |
|                  | C25                                       | -4.107081594  | 6.505846113   | -4.466955922 |
|                  | C26                                       | -2.808576642  | 4.536838775   | -3.584240653 |
|                  | C27                                       | -8.672941047  | 5.679793501   | -3.916866496 |
|                  | C28                                       | -9.384970603  | 6.158879693   | -2.666832736 |
|                  | C29                                       | -10.785599940 | -4.446677413  | 6.662488129  |
|                  | C30                                       | -9.522875287  | -3.713280178  | 7.107521861  |
|                  | C31                                       | -8.302152894  | -1.549185943  | 6.834626966  |
|                  | C32                                       | -8.853427915  | -0.363916130  | 7.651455671  |
|                  | C33                                       | -7.692771719  | -1.089884293  | 5.500197041  |
|                  | C34                                       | -6.501646285  | -0.150173959  | 5.684948442  |
|                  | C35                                       | -5.755058129  | 0.071423696   | 4.372282807  |
|                  | C36                                       | -4.214464996  | 1.964926847   | 3.812726185  |
|                  | C37                                       | -8.592575757  | 0.968712403   | 9.690952933  |
|                  | C38                                       | -7.715464685  | 2.201526063   | 9.663920505  |
|                  | C39                                       | 0.096540192   | -4.428143285  | -4.012633787 |
|                  | C40                                       | 0.726222644   | -3.254325260  | -4.787770789 |
|                  | C41                                       | -0.086300801  | -3.971135810  | -2.544372075 |
|                  | C42                                       | -0.950478228  | -4.882759859  | -1.648052835 |
|                  | C43                                       | -0.194842172  | -5.993464684  | -0.920998762 |
|                  | C44                                       | 2.859109229   | -2.382644322  | -5.640594264 |
|                  | C45                                       | 2.661748349   | -2.120551048  | -7.137379048 |
|                  | C46                                       | 4.350227162   | -2.584008538  | -5.312418649 |
|                  | C47                                       | 1.257824403   | -2.574639326  | -9.103870892 |
|                  | C48                                       | 0.109293421   | -1.550328831  | -9.104070869 |
|                  | C49                                       | -1.519784460  | -0.294793776  | -7.752810572 |
|                  | C50                                       | -1.169310355  | 0.993235423   | -7.005868687 |
|                  | C51                                       | 0.355117543   | 2.220139049   | -5.529213514 |
|                  | C52                                       | 0.669998555   | 3.388576317   | -6.491641987 |
|                  | C53                                       | 1.651557219   | 2.033010961   | -4.725637683 |
|                  | C54                                       | 1.659297916   | 1.016765569   | -3.633920889 |
|                  | C55                                       | 0.689238281   | 0.444394168   | -2.848196631 |

|      |              |              |               |
|------|--------------|--------------|---------------|
| C56  | 2.658781182  | -0.289063601 | -2.127940634  |
| C57  | 1.933101006  | 3.963404510  | -8.529457149  |
| C58  | 0.858278092  | 4.892103854  | -9.093573001  |
| C59  | 2.611780440  | 3.164116174  | -9.665967513  |
| C60  | 3.662642467  | 3.878088334  | -10.466649363 |
| C61  | 3.738084437  | 5.183132803  | -10.913462219 |
| C62  | 5.511526247  | 4.033922792  | -11.582733594 |
| C63  | -3.157786039 | 6.190750294  | 6.822922725   |
| C64  | -3.894412400 | 5.525800611  | 7.970271629   |
| C65  | -3.135516242 | 5.174864509  | 5.651265087   |
| C66  | -2.470565500 | 5.724657396  | 4.411625522   |
| C67  | -3.207880607 | 6.375948114  | 3.405651780   |
| C68  | -1.078588368 | 5.617002233  | 4.239916489   |
| C69  | -2.583113836 | 6.897621645  | 2.266646324   |
| C70  | -0.440776023 | 6.142873100  | 3.116216794   |
| C71  | -1.194688965 | 6.779201944  | 2.126743677   |
| C72  | 4.792075603  | 6.696611980  | 4.107450999   |
| C73  | 5.806163918  | 6.921508468  | 2.977094560   |
| C74  | 3.753121121  | 5.643739756  | 3.696137881   |
| C75  | 8.127304229  | 6.622065415  | 2.222572214   |
| C76  | 8.037597140  | 5.683434049  | 1.017454531   |
| C77  | 6.964062000  | 3.678919838  | 0.054815887   |
| C78  | 5.779677198  | 4.115984146  | -0.834522756  |
| C79  | 6.782679222  | 2.270453432  | 0.644776875   |
| C80  | 6.540560513  | 1.119591013  | -0.336736935  |
| C81  | 7.713018816  | 0.734525804  | -1.255476975  |
| C82  | 8.683080663  | 1.972026972  | -3.184230552  |
| C83  | 3.575677168  | 5.148082663  | -0.994646687  |
| C84  | 3.780672488  | 6.528481033  | -1.641845108  |
| C85  | 2.277914892  | 5.198994555  | -0.169290185  |
| C86  | 4.509039220  | 8.821907971  | -1.219879088  |
| C87  | 5.593105760  | 9.468240459  | -2.074316298  |
| C88  | 7.679516340  | 9.174462698  | -3.338135103  |
| C89  | 7.416449390  | 9.466185783  | -4.829367635  |
| C90  | 8.925548206  | 8.284301825  | -3.144324350  |
| C91  | 8.748339819  | 6.902923471  | -3.763035987  |
| C92  | 6.008044784  | 9.037695614  | -6.785691117  |
| C93  | 5.769922776  | 10.497276948 | -7.158258059  |
| C94  | 4.758342352  | 8.195208728  | -7.150196758  |
| C95  | 4.983397412  | 6.722959446  | -6.894429309  |
| C96  | 5.693240795  | 5.943580096  | -7.823349892  |
| C97  | 4.566531709  | 6.120696872  | -5.694967654  |
| C98  | 6.003257343  | 4.609444797  | -7.555226580  |
| C99  | 4.886756974  | 4.791892497  | -5.398350733  |
| C100 | 5.611395217  | 4.057110251  | -6.333869226  |
| C101 | 4.574581492  | -6.528497142 | 7.116356541   |
| C102 | 4.404973850  | -6.557912707 | 5.608193700   |
| C103 | 4.328056927  | -5.174545678 | 3.551645127   |
| C104 | 5.558556889  | -4.559863256 | 2.874370331   |
| C105 | 6.878885616  | -2.526595357 | 2.569352386   |
| C106 | 7.491425680  | -1.383091832 | 3.372016279   |
| C107 | 7.437875087  | 0.082556219  | 5.331882096   |
| C108 | 8.197740335  | -0.372092041 | 6.561170968   |
| C109 | 5.370977473  | -8.589724123 | 0.734071877   |
| C110 | 5.844863101  | -7.960040596 | -0.578663448  |
| C111 | 3.887051806  | -8.216724478 | 0.962012410   |
| C112 | 3.228361237  | -9.128061206 | 2.012702704   |
| C113 | 1.899206345  | -8.551434675 | 2.450965758   |
| C114 | 6.604236236  | -5.941689278 | -1.726498761  |
| C115 | 7.847923140  | -5.112748563 | -1.467431999  |
| C116 | 5.461145934  | -5.189118878 | -2.448140137  |
| C117 | 4.743858191  | -4.258989619 | -1.508512582  |
| C118 | 5.256749523  | -2.979181241 | -1.240749946  |
| C119 | 3.627554140  | -4.706285587 | -0.779472657  |
| C120 | 4.706080164  | -2.203558847 | -0.214672577  |
| C121 | 3.075068048  | -3.926260592 | 0.241488683   |
| C122 | 3.635685326  | -2.681996245 | 0.546798042   |
| C123 | -0.905052474 | -4.558707295 | 10.037552782  |
| C124 | -1.887679308 | -3.717934093 | 10.867365118  |
| C125 | -1.559911024 | -5.171193785 | 8.788374391   |
| C126 | -0.626899432 | -5.844216654 | 7.829383886   |
| C127 | -0.008742539 | -7.068103894 | 7.990269387   |
| C128 | 0.447301815  | -6.269721628 | 5.975551779   |
| C129 | -4.102379192 | -3.439321359 | 11.834421688  |
| C130 | -3.565331001 | -3.170977230 | 13.223017291  |
| C131 | -4.200976772 | -5.225317167 | 2.113121764   |
| C132 | -4.298450105 | -4.379266812 | 3.351247180   |
| C133 | -3.544061393 | -4.985288673 | 4.604384630   |
| C134 | -4.071458871 | -6.421154254 | 4.899303232   |
| C135 | -3.513291958 | -6.985480870 | 6.215215966   |

|       |               |               |              |
|-------|---------------|---------------|--------------|
| C136  | -4.142073447  | -8.279837248  | 6.646052399  |
| C137  | -3.943803059  | -4.092781313  | 5.819132195  |
| C138  | 1.000930654   | -0.546970212  | 4.235043718  |
| Fe139 | 1.494978908   | -2.273933645  | 5.063537195  |
| Fe140 | 0.873755029   | 0.609766036   | 2.323831088  |
| Fe141 | 0.907041508   | 1.245426890   | 5.100021450  |
| Fe142 | 2.925607198   | -0.239142963  | 4.462113186  |
| Fe143 | 3.039866480   | 2.286528251   | 3.657554637  |
| Fe144 | -0.561382919  | -0.797683841  | 5.456977232  |
| Fe145 | -0.234203427  | -2.000597598  | 3.134382758  |
| H146  | -3.909533010  | -7.580880205  | -4.254042345 |
| H147  | -2.278937221  | -7.570810034  | -4.236796352 |
| H148  | -2.647080260  | -6.440183827  | -8.364782324 |
| H149  | -2.152707293  | -7.969444113  | -6.588371872 |
| H150  | -3.907847360  | -8.116372487  | -6.635564506 |
| H151  | -2.273850592  | -3.766422011  | -7.521143727 |
| H152  | -5.350212808  | -5.368728396  | -8.402329711 |
| H153  | -2.691325036  | -4.294677375  | -9.170580929 |
| H154  | -7.519347640  | -4.535037367  | -8.344986412 |
| H155  | -5.924521641  | -4.887576774  | -5.849136446 |
| H156  | -6.868376075  | -2.903046697  | -8.640109759 |
| H157  | -3.638420867  | -1.286501337  | -2.891871743 |
| H158  | -4.230867111  | -3.359016092  | -4.795754756 |
| H159  | -6.436511652  | -4.668200285  | -3.583154114 |
| H160  | -4.706502645  | 1.887574845   | -6.219426996 |
| H161  | -4.870336207  | -1.022415893  | -6.293513223 |
| H162  | -7.765623919  | -3.545810609  | -3.968163566 |
| H163  | -2.746284988  | -1.626745208  | -4.397680870 |
| H164  | -7.512424972  | -0.408556368  | -5.925747674 |
| H165  | -5.568307722  | 0.882330234   | -7.415817939 |
| H166  | -5.525272859  | -0.828080489  | -0.385329426 |
| H167  | -3.764880379  | -0.931906630  | -0.182343524 |
| H168  | -4.753313783  | -0.225880054  | 1.108641715  |
| H169  | -4.298981190  | 0.935468249   | -1.704038466 |
| H170  | -9.737403000  | 0.133523497   | -5.700513877 |
| H171  | -2.837870314  | 3.503628615   | -3.209412329 |
| H172  | -7.146740092  | 4.187644416   | -4.087857642 |
| H173  | -5.082182835  | 6.901718015   | -4.787111715 |
| H174  | -2.323701223  | 1.138926905   | -0.292702410 |
| H175  | -3.249836860  | 1.861441470   | 1.030571581  |
| H176  | -3.761373034  | 7.061050123   | 6.502471481  |
| H177  | -2.191162766  | 4.549407799   | -4.495355640 |
| H178  | -3.435257163  | 6.512143608   | -5.338216150 |
| H179  | -2.307811786  | 5.165390467   | -2.828725303 |
| H180  | -3.690112447  | 7.194768371   | -3.714546163 |
| H181  | -4.670858269  | 4.436493266   | -4.667835105 |
| H182  | -4.635262414  | 5.640365245   | -1.846849842 |
| H183  | -5.184352130  | 2.917671410   | -2.811733448 |
| H184  | -3.029115309  | 2.752052633   | -0.498700825 |
| H185  | 2.228127456   | 4.299057444   | 0.465066974  |
| H186  | 1.435991756   | 5.174900892   | -0.877714757 |
| H187  | 1.295351182   | 6.655880379   | 0.703318020  |
| H188  | -1.152720324  | 7.616243111   | 0.375082374  |
| H189  | 0.635077358   | 6.024872765   | 2.988877274  |
| H190  | -0.478915991  | 5.081928438   | 4.979592844  |
| H191  | -4.292886927  | 6.471224564   | 3.501829260  |
| H192  | -6.737164513  | 1.126383432   | -2.196015167 |
| H193  | -8.893449113  | -0.970270350  | -1.181383189 |
| H194  | -9.934354368  | 0.465885598   | -1.321530743 |
| H195  | -7.950382519  | -0.488079967  | -3.310112672 |
| H196  | -3.326829114  | 1.864077335   | -5.656231791 |
| H197  | -9.3176332886 | 7.385971243   | 1.488736252  |
| H198  | -6.062033907  | 1.947608291   | 0.573438987  |
| H199  | -8.584542796  | 6.525374350   | -4.618708195 |
| H200  | -9.313424657  | 4.913274750   | -4.382999879 |
| H201  | -9.166763259  | 5.580693380   | -1.738825238 |
| H202  | -8.656752136  | 0.588110811   | 10.720843859 |
| H203  | -0.159158011  | -7.033587251  | 0.843635430  |
| H204  | -5.862543016  | -6.051531680  | 2.638921119  |
| H205  | 3.046970159   | -10.118486201 | 1.570128122  |
| H206  | 3.894167560   | -9.254077071  | 2.878697287  |
| H207  | 3.325931515   | -8.298690209  | 0.018455158  |
| H208  | 8.473140134   | -5.477398307  | -0.618858047 |
| H209  | 5.417873109   | -9.672621490  | 0.543658466  |
| H210  | 0.912104279   | -3.838478066  | -2.095015790 |
| H211  | -1.739550942  | -5.367053514  | -2.249250064 |
| H212  | 6.158062327   | -6.133404613  | 0.364627928  |
| H213  | 6.951286778   | -6.735903452  | -2.419762695 |
| H214  | 6.222344651   | -7.321957000  | 2.140386507  |
| H215  | -1.376196025  | -5.765605636  | 0.774391604  |

|      |              |              |               |
|------|--------------|--------------|---------------|
| H216 | 3.835212328  | -7.160854663 | 1.268503647   |
| H217 | 6.062211481  | -8.879149091 | 2.644782294   |
| H218 | 0.621076693  | -6.247996965 | -4.845768709  |
| H219 | -0.560866934 | -2.979016854 | -2.571211809  |
| H220 | 2.798804797  | -7.852600450 | 4.053249999   |
| H221 | -1.475175552 | -4.261852953 | -0.908105137  |
| H222 | -0.468024571 | 2.555521427  | -4.881516281  |
| H223 | -0.388198992 | 0.558819241  | -2.851969464  |
| H224 | -1.829492444 | 0.005416133  | -8.761514456  |
| H225 | -0.148362884 | -1.772470974 | -7.054212214  |
| H226 | 1.380279073  | 2.013865468  | -7.831408959  |
| H227 | 3.088622707  | 6.040751079  | -10.778924047 |
| H228 | -0.137266928 | 4.402975715  | -9.224410940  |
| H229 | 1.830045287  | 2.749666359  | -10.327688824 |
| H230 | 2.677467625  | 4.574966544  | -7.994507249  |
| H231 | 6.460924203  | 3.825960191  | -12.069410810 |
| H232 | 1.891377959  | 3.014647375  | -4.283599462  |
| H233 | 2.469561446  | 1.803158366  | -5.427917349  |
| H234 | 5.286911384  | 6.092011708  | -12.075903502 |
| H235 | 3.109956622  | 2.295940700  | -9.205178929  |
| H236 | 0.408132507  | 0.119384196  | -5.992696045  |
| H237 | -2.397898327 | -0.750002988 | -7.270220230  |
| H238 | 2.058005117  | -2.156448927 | -9.727891689  |
| H239 | 3.409173558  | -0.813676141 | -1.542253004  |
| H240 | 0.898180371  | -3.492235552 | -9.590341231  |
| H241 | -1.829326875 | 7.331050178  | 7.885818695   |
| H242 | -1.246161668 | 6.818385882  | 6.448818707   |
| H243 | 4.625514812  | 4.613333417  | 0.820527852   |
| H244 | 3.428855788  | 4.440319153  | -1.823872027  |
| H245 | 4.915682503  | 7.119378278  | -0.041774925  |
| H246 | 3.829185831  | 0.762164244  | -3.554240364  |
| H247 | 5.390457208  | 0.011975244  | -4.731974744  |
| H248 | 5.414564682  | 1.583344575  | -4.938357286  |
| H249 | 4.456308085  | -2.734387632 | -4.230817945  |
| H250 | 4.726059875  | -3.484431388 | -5.824513747  |
| H251 | 9.140824658  | 8.224898107  | -2.067406863  |
| H252 | 9.770775485  | 8.776853150  | -3.643723017  |
| H253 | 8.526342488  | 5.987534611  | -1.870898173  |
| H254 | 8.268140638  | 4.979098656  | -3.282970993  |
| H255 | 10.690813643 | 2.373438973  | -3.178170328  |
| H256 | 7.723208960  | -0.354268683 | -1.420440695  |
| H257 | 6.547865023  | 4.003155278  | -8.285974780  |
| H258 | 3.987353761  | 6.688897444  | -4.961013656  |
| H259 | 7.557840798  | 2.743286109  | -4.741621216  |
| H260 | 5.938244819  | 2.289299018  | 1.351214847   |
| H261 | 6.632534238  | 4.532558359  | 1.987331946   |
| H262 | 5.634061559  | 1.298159031  | -0.936290840  |
| H263 | 1.380964943  | -3.692096331 | -7.279119109  |
| H264 | 9.096270555  | 6.453117021  | 2.712202825   |
| H265 | 2.377173352  | -4.371535700 | -4.792197592  |
| H266 | 7.681356179  | 2.044025675  | 1.240265891   |
| H267 | 4.605017955  | 4.357762882  | -4.435709244  |
| H268 | 4.741690862  | -1.136727167 | -6.552780997  |
| H269 | 8.128640059  | 7.643948085  | 1.817500608   |
| H270 | 10.192725219 | 1.179834365  | -2.038009581  |
| H271 | 9.266590369  | 2.883535555  | -4.920317922  |
| H272 | 0.952613475  | -6.119094256 | -3.204807613  |
| H273 | -0.908273683 | -4.578019834 | -4.454329881  |
| H274 | 6.019091130  | 6.385774337  | -8.768840154  |
| H275 | 2.540564327  | -1.437096357 | -5.169688279  |
| H276 | 7.841599616  | 3.705235656  | -0.605355300  |
| H277 | 8.654359591  | 1.000751613  | -0.758037387  |
| H278 | 6.332725194  | 0.244103460  | 0.291876826   |
| H279 | 6.778925231  | 1.295213167  | -3.101879785  |
| H280 | 3.549608986  | 9.040540945  | -1.711197744  |
| H281 | 6.509592352  | 7.654225797  | -2.341457387  |
| H282 | 7.897598219  | 10.159996500 | -2.901141125  |
| H283 | 4.516374940  | 9.340124069  | -0.250656723  |
| H284 | 5.736102178  | 8.300763558  | -4.789021764  |
| H285 | 5.204557270  | -5.675753505 | 7.408715600   |
| H286 | 3.563163373  | -6.339004254 | 7.532449745   |
| H287 | -0.119126664 | -3.859508978 | 9.717059101   |
| H288 | 5.112551482  | -7.829210761 | 8.594724484   |
| H289 | 4.648734760  | -8.561203236 | 7.205073440   |
| H290 | 3.087562518  | 5.466488806  | 4.550433345   |
| H291 | 3.688692993  | 8.332845353  | 3.603975328   |
| H292 | 7.276243030  | 6.001287929  | 4.083970512   |
| H293 | 3.162022788  | 6.027563457  | 2.852013075   |
| H294 | 4.756764796  | 8.626901382  | 4.807820279   |
| H295 | 6.630924284  | 0.774277532  | 5.618629822   |

|       |               |               |              |
|-------|---------------|---------------|--------------|
| H296  | 5.323710468   | 6.336449359   | 5.002289143  |
| H297  | -8.477272698  | -0.605882261  | 4.894544035  |
| H298  | -7.539920452  | -2.082528636  | 7.415707326  |
| H299  | 6.017836860   | -1.426403020  | 4.842167855  |
| H300  | -2.728272589  | 3.330167141   | 3.521950447  |
| H301  | 7.685502477   | -3.241889090  | 2.357486474  |
| H302  | 2.212731873   | -4.284392365  | 0.809409832  |
| H303  | 6.579889995   | -2.098378902  | 1.598761234  |
| H304  | -6.409145150  | 0.527481746   | 3.617953100  |
| H305  | 5.019195225   | -2.764703407  | 3.686051394  |
| H306  | -5.419593745  | -0.895300624  | 3.960538501  |
| H307  | -7.373861413  | -1.997893585  | 4.963450090  |
| H308  | -5.794494630  | -0.576086185  | 6.412242364  |
| H309  | -6.832519042  | 0.822523950   | 6.082751099  |
| H310  | 4.771795804   | -5.941001572  | -2.858133758 |
| H311  | -10.190016409 | -2.178859276  | 6.014550622  |
| H312  | -10.453633547 | -5.232718436  | 5.967860440  |
| H313  | 3.246203133   | -2.074082923  | 1.363797627  |
| H314  | -12.391501065 | -3.155777355  | 6.659230533  |
| H315  | -12.326337560 | -4.120091144  | 5.336613371  |
| H316  | -3.826728292  | 0.508941928   | 5.145635420  |
| H317  | 5.111121380   | -1.214873653  | 0.005741786  |
| H318  | 3.189035523   | -5.681118416  | -1.006473841 |
| H319  | -5.729903151  | -5.751859109  | 9.563198941  |
| H320  | -2.306013896  | -5.918168631  | 9.113368892  |
| H321  | -5.634303269  | -4.060003320  | 7.812977087  |
| H322  | -5.223380196  | -7.191546476  | 9.321156766  |
| H323  | 8.490661711   | -1.450224134  | 6.560397493  |
| H324  | -3.439045545  | -1.902419374  | 7.191535947  |
| H325  | -5.351058480  | -4.204892844  | 3.622972069  |
| H326  | 4.593440129   | -4.517431042  | 5.541306249  |
| H327  | -5.171384758  | -6.389571956  | 4.956391568  |
| H328  | 1.199612985   | -8.148933414  | 6.588237554  |
| H329  | 0.837189334   | -6.212992670  | 4.967151539  |
| H330  | -11.179870345 | -4.962798524  | 7.553708935  |
| H331  | -2.263180343  | 1.954443274   | 4.486654328  |
| H332  | -5.000838729  | -1.205577524  | 8.869782257  |
| H333  | -2.849293257  | -0.512298884  | 7.556332202  |
| H334  | -7.291135011  | -0.605774077  | 9.009088736  |
| H335  | -6.112311828  | 2.497154365   | 3.227021581  |
| H336  | -4.435137106  | -10.067708539 | 6.101589122  |
| H337  | -2.429798220  | -7.140305623  | 6.106472097  |
| H338  | -3.669402635  | -6.279383705  | 7.038789995  |
| H339  | -3.780905246  | -7.079697677  | 4.067423536  |
| H340  | 3.444093323   | -4.533882817  | 3.402087203  |
| H341  | 6.112211761   | -2.612605377  | -1.814089371 |
| H342  | 5.915734283   | -4.645210572  | -3.289874762 |
| H343  | -3.812816348  | -3.416019626  | 3.147877398  |
| H344  | -5.876953771  | -2.428269787  | 9.269640020  |
| H345  | -7.046723822  | -4.156633482  | 8.450838365  |
| H346  | -4.856221677  | 3.367195046   | 2.432836920  |
| H347  | 0.000693612   | -7.762023425  | 8.822825410  |
| H348  | -2.105015530  | -4.384726778  | 8.251058599  |
| H349  | 4.151268863   | -6.152125181  | 3.097932097  |
| H350  | 8.154863943   | 0.635538794   | 4.701711166  |
| H351  | -4.178733797  | 4.897490256   | 5.433599625  |
| H352  | -2.608585522  | 4.269379238   | 5.992542663  |
| H353  | 0.211076678   | -5.136461468  | 11.659138585 |
| H354  | -0.990304370  | -6.186228675  | 11.295250840 |
| H355  | -5.004285885  | -4.061044870  | 11.950978688 |
| H356  | -3.499781539  | -5.007301466  | 10.522530993 |
| H357  | -2.789865423  | -3.893873388  | 13.575341812 |
| H358  | -4.411670111  | -2.493059934  | 11.361464072 |
| H359  | -3.264558442  | 4.837233288   | 8.584545919  |
| H360  | 5.438832821   | 11.148476493  | -6.315342337 |
| H361  | -9.605472773  | 1.283386740   | 9.384630534  |
| H362  | -7.156614324  | 2.362749766   | 8.709472879  |
| H363  | 6.864811382   | 8.680279531   | -7.380688299 |
| H364  | 3.895987867   | 8.558950293   | -6.571298112 |
| H365  | 4.538171266   | 8.376951384   | -8.211956074 |
| H366  | -1.238192721  | -2.662816446  | 2.211602890  |
| H367  | 6.335167199   | 2.310823264   | -6.800482269 |
| H368  | -0.744449983  | 1.086732439   | 2.446169593  |
| H369  | -0.791174370  | 0.268175387   | 2.515474178  |
| H370  | -0.635281576  | -1.149267539  | 0.529497410  |
| H371  | 0.936937296   | -0.845546418  | -1.106249953 |
| Mo372 | -1.007922814  | -3.456074634  | 5.251528196  |
| N373  | -3.086658924  | -7.977073195  | -4.715019820 |
| N374  | -3.004917828  | -5.744056480  | -7.715114087 |
| N375  | -5.451250147  | -4.386366759  | -8.158428443 |



|      |               |              |               |
|------|---------------|--------------|---------------|
| N376 | -6.590867398  | -4.160067828 | -5.596579967  |
| N377 | -4.600348557  | -2.566511045 | -4.266977909  |
| N378 | -4.870153593  | -0.153474093 | -5.754830304  |
| N379 | -7.703110892  | 0.544560522  | -5.605862449  |
| N380 | -8.643579260  | 0.160806439  | -2.925429460  |
| N381 | -6.857042094  | 1.350662272  | -1.210537555  |
| N382 | -5.287611988  | 3.688461957  | -2.150448709  |
| N383 | -7.387996354  | 5.066330950  | -3.623939238  |
| N384 | -11.752121587 | -3.577123347 | 5.982037567   |
| N385 | -9.395173442  | -2.477837744 | 6.590583847   |
| N386 | -4.566813615  | 0.912228018  | 4.563031492   |
| N387 | -5.121918466  | 2.581295280  | 3.022387038   |
| N388 | -2.934919621  | 2.373509548  | 3.804682711   |
| N389 | -8.156750498  | -0.069254682 | 8.776682962   |
| N390 | 0.952621095   | -5.616477169 | -4.113054789  |
| N391 | -0.617368343  | -6.279781266 | 0.323968410   |
| N392 | 2.033840292   | -3.443842063 | -5.099035010  |
| N393 | 1.776055864   | -2.904544050 | -7.787992771  |
| N394 | -0.456206448  | -1.272658859 | -7.893785103  |
| N395 | -0.019298508  | 1.006564520  | -6.254563114  |
| N396 | 2.874265673   | 0.533576819  | -3.161796937  |
| N397 | 1.338852017   | -0.361611137 | -1.934014269  |
| N398 | 1.316201510   | 3.007510808  | -7.623187550  |
| N399 | 4.776357280   | 3.170460411  | -10.891925059 |
| N400 | 4.922347225   | 5.261971520  | -11.616365995 |
| N401 | -1.799917521  | 6.523562293  | 7.258096785   |
| N402 | 4.084141388   | 7.936015533  | 4.462979401   |
| N403 | 7.075155037   | 6.479892618  | 3.210071291   |
| N404 | 7.222862203   | 4.613838184  | 1.145655223   |
| N405 | 7.658297274   | 1.387107756  | -2.569402732  |
| N406 | 9.931587352   | 1.925271269  | -2.674728258  |
| N407 | 8.479508894   | 2.706564699  | -4.302021050  |
| N408 | 4.719200248   | 4.693446966  | -0.209175212  |
| N409 | 4.610148470   | 7.389258567  | -0.982252360  |
| N410 | 6.524619172   | 8.634241988  | -2.625287519  |
| N411 | 8.459069256   | 5.900974621  | -2.892388977  |
| N412 | 6.298579475   | 8.920158260  | -5.366208892  |
| N413 | 5.192585741   | -7.776834806 | 7.576780887   |
| N414 | 4.537830106   | -5.373996132 | 4.979810236   |
| N415 | 5.771168104   | -3.258335883 | 3.155055540   |
| N416 | 6.917496544   | -1.024622766 | 4.549320819   |
| N417 | 6.298295675   | -8.300450114 | 1.835627308   |
| N418 | 6.203550869   | -6.645470770 | -0.523244473  |
| N419 | -0.266793785  | -5.592476616 | 10.876421576  |
| N420 | -0.328190243  | -5.359347473 | 6.558009998   |
| N421 | 0.664134855   | -7.315361923 | 6.812919528   |
| N422 | -3.157292439  | -4.186755103 | 11.021395538  |
| N423 | 0.884877564   | 2.188829139  | -0.165074405  |
| N424 | 0.892303444   | 1.589451220  | 0.792282369   |
| O425 | -3.560192350  | -5.275186867 | -5.556507826  |
| O426 | -4.391680216  | -2.422609810 | -7.700459848  |
| O427 | -7.813226584  | -2.382923567 | -6.353992240  |
| O428 | -6.327918842  | -1.688280491 | -3.073731011  |
| O429 | -4.144059199  | 0.960917897  | -3.906547400  |
| O430 | -6.946158936  | 2.693267540  | -5.414312273  |
| O431 | -10.344927254 | 1.637195197  | -3.358749881  |
| O432 | -8.202829931  | 0.968418572  | 0.614609648   |
| O433 | -5.513433716  | 4.288637971  | 0.048374026   |
| O434 | -6.741707173  | 6.845105684  | -2.368980105  |
| O435 | -10.205460208 | 7.064840848  | -2.675304223  |
| O436 | -8.712805505  | -4.284337926 | 7.868213507   |
| O437 | -9.875636235  | 0.239648238  | 7.280518352   |
| O438 | -7.622732656  | 2.983309786  | 10.596786854  |
| O439 | 0.091838130   | -2.220380539 | -5.093194592  |
| O440 | 0.747633057   | -6.616723031 | -1.461385255  |
| O441 | 3.273499985   | -1.173117574 | -7.671768846  |
| O442 | 5.118704751   | -1.432153567 | -5.684427410  |
| O443 | -0.256792944  | -1.048123295 | -10.173066402 |
| O444 | -1.888890585  | 1.988808666  | -7.112609054  |
| O445 | 0.472219047   | 4.565066181  | -6.178714356  |
| O446 | 1.049347544   | 6.051735167  | -9.416221286  |
| O447 | -5.079544521  | 5.698630995  | 8.217297066   |
| O448 | -0.517015483  | 7.257501957  | 1.021241161   |
| O449 | 5.500333223   | 7.488721026  | 1.911883204   |
| O450 | 8.729522486   | 5.924026770  | 0.007330103   |
| O451 | 5.832216008   | 3.946292749  | -2.065522939  |
| O452 | 3.167289455   | 6.830879824  | -2.674879534  |
| O453 | 2.233639723   | 6.386140909  | 0.628832576   |
| O454 | 5.591916301   | 10.691957943 | -2.260313019  |
| O455 | 8.188814038   | 10.185939096 | -5.478534088  |

|                   |        |              |                                           |              |              |
|-------------------|--------|--------------|-------------------------------------------|--------------|--------------|
|                   | O456   | 8.803660139  | 6.728487036                               | -4.990870983 |              |
|                   | O457   | 5.884680958  | 10.921923704                              | -8.296447687 |              |
|                   | O458   | 5.982767208  | 2.744044866                               | -6.000078466 |              |
|                   | O459   | 4.129437862  | -7.635053811                              | 5.020225871  |              |
|                   | O460   | 6.301595188  | -5.234750984                              | 2.126811685  |              |
|                   | O461   | 8.493894016  | -0.816794145                              | 2.901966698  |              |
|                   | O462   | 8.497478776  | 0.370679811                               | 7.482348967  |              |
|                   | O463   | 5.852036579  | -8.603967245                              | -1.641303363 |              |
|                   | O464   | 0.876282498  | -8.628720813                              | 1.776735622  |              |
|                   | O465   | 1.888501354  | -7.884051311                              | 3.620511278  |              |
|                   | O466   | 8.192464431  | -4.153241068                              | -2.141761772 |              |
|                   | O467   | -1.517921188 | -2.685958648                              | 11.458008531 |              |
|                   | O468   | -3.994028144 | -2.288291812                              | 13.952858791 |              |
|                   | O469   | -3.308206090 | -5.180885839                              | 1.277946240  |              |
|                   | O470   | -5.211420258 | -6.133390959                              | 1.916110877  |              |
|                   | O471   | -4.728117887 | -8.467902028                              | 7.709978548  |              |
|                   | O472   | -3.995482364 | -9.273170278                              | 5.730297064  |              |
|                   | O473   | -2.964926937 | -3.498396429                              | 6.417206903  |              |
|                   | O474   | -5.143377908 | -4.028653263                              | 6.180333970  |              |
|                   | O475   | -2.180621728 | -4.980328663                              | 4.402631521  |              |
|                   | O476   | -5.772205781 | -1.453755303                              | 9.439894276  |              |
|                   | O477   | -3.685933835 | -1.018845851                              | 7.567242633  |              |
|                   | O478   | 5.386132951  | 0.881722502                               | -4.241473739 |              |
|                   | O479   | -5.466459927 | -6.577067201                              | 10.044277182 |              |
|                   | O480   | -6.087590350 | -4.121395445                              | 8.703651851  |              |
|                   | S481   | 4.510525917  | 4.038145845                               | 3.176802889  |              |
|                   | S482   | 3.277839951  | 0.474277243                               | 2.339979303  |              |
|                   | S483   | 0.743389961  | -3.899002303                              | 3.689983149  |              |
|                   | S484   | 0.779869946  | 2.767844251                               | 3.417105224  |              |
|                   | S485   | 0.582576173  | -1.371689215                              | 1.098727734  |              |
|                   | S486   | 3.718094855  | -2.139539707                              | 5.340622627  |              |
|                   | S487   | -2.156512926 | -1.651289475                              | 4.144315116  |              |
|                   | S488   | 3.086841346  | 1.527657478                               | 5.810940929  |              |
|                   | S489   | 0.209297239  | -2.273409824                              | 6.932339464  |              |
|                   | S490   | -1.022861431 | 1.210422223                               | 6.257603381  |              |
| <b>10 (S=1/2)</b> |        |              | <b>bm12b6x2h2n2n2xhdtz1conexbth.car_3</b> |              |              |
| Fe(139)           | 2.435  | C1           | -2.198880321                              | -5.183028445 | -8.037343413 |
| Fe(140)           | -0.022 | C2           | -2.567225358                              | -3.701439951 | -7.906438777 |
| Fe(141)           | 1.901  | C3           | -2.542960923                              | -1.487149960 | -8.974091214 |
| Fe(142)           | -2.607 | C4           | -3.976174727                              | -1.037378585 | -8.702389831 |
| Fe(143)           | 2.555  | C5           | -6.361319046                              | -1.499168338 | -8.909935823 |
| Fe(144)           | -2.242 | C6           | -6.737334408                              | -1.567136302 | -7.425104764 |
| Fe(145)           | -1.111 | C7           | -6.260857835                              | -2.604614809 | -5.254138111 |
|                   |        | C8           | -5.593987674                              | -1.465115404 | -4.478090402 |
|                   |        | C9           | -3.660799873                              | -0.008715597 | -4.213333919 |
|                   |        | C10          | -4.365982295                              | 1.343293543  | -4.399454932 |
|                   |        | C11          | -5.619735422                              | 2.812284114  | -5.882910673 |
|                   |        | C12          | -7.016857404                              | 2.892435833  | -5.250227541 |
|                   |        | C13          | -9.209409945                              | 1.828089148  | -5.008110620 |
|                   |        | C14          | -9.518030764                              | 1.431657033  | -3.560572833 |
|                   |        | C15          | -8.903500436                              | 0.001647193  | -1.655826778 |
|                   |        | C16          | -7.958196632                              | 0.440369848  | -0.535237268 |
|                   |        | C17          | -5.885787269                              | 1.685754460  | 0.011034322  |
|                   |        | C18          | -5.877004158                              | 3.221455377  | 0.093016966  |
|                   |        | C19          | -4.495810829                              | 1.070485239  | -0.308412734 |
|                   |        | C20          | -3.397555409                              | 1.651727085  | 0.590531810  |
|                   |        | C21          | -4.538859784                              | -0.456533088 | -0.192170189 |
|                   |        | C22          | -5.482076742                              | 5.355926002  | -1.062626512 |
|                   |        | C23          | -6.900533840                              | 5.949537256  | -1.164027764 |
|                   |        | C24          | -4.530976614                              | 5.875553263  | -2.167325271 |
|                   |        | C25          | -4.598692183                              | 7.403817721  | -2.275931006 |
|                   |        | C26          | -3.090714794                              | 5.420701989  | -1.900231344 |
|                   |        | C27          | -9.047220744                              | 5.983177922  | -2.291259653 |
|                   |        | C28          | -9.854547275                              | 5.888253805  | -1.011169356 |
|                   |        | C29          | -10.355883518                             | -7.396649869 | 4.512289100  |
|                   |        | C30          | -9.169240436                              | -6.752134217 | 5.234057539  |
|                   |        | C31          | -8.132731806                              | -4.540549521 | 5.761152257  |
|                   |        | C32          | -8.807490454                              | -3.757459121 | 6.902264095  |
|                   |        | C33          | -7.520937293                              | -3.605909771 | 4.701946416  |
|                   |        | C34          | -6.466215603                              | -2.642533577 | 5.257393671  |
|                   |        | C35          | -5.672753585                              | -1.995378175 | 4.119989859  |
|                   |        | C36          | -4.357204448                              | 0.125789028  | 4.289466092  |
|                   |        | C37          | -8.665214338                              | -3.110569649 | 9.260372400  |
|                   |        | C38          | -7.967866877                              | -1.801520265 | 9.566478518  |
|                   |        | C39          | 0.476511608                               | -2.636080273 | -5.277129267 |
|                   |        | C40          | 0.991660803                               | -1.212287125 | -5.546964894 |
|                   |        | C41          | 0.246494021                               | -2.790786591 | -3.756857907 |
|                   |        | C42          | -0.672483738                              | -3.951266251 | -3.312350887 |
|                   |        | C43          | -0.007072933                              | -5.315737466 | -3.162130854 |

|      |              |              |              |
|------|--------------|--------------|--------------|
| C44  | 3.054539214  | 0.135658114  | -5.813069759 |
| C45  | 2.625862086  | 1.038525044  | -6.972568768 |
| C46  | 4.572727277  | -0.178408959 | -5.827565885 |
| C47  | 1.642515625  | 1.154948953  | -9.214285984 |
| C48  | 0.328209001  | 1.897937358  | -8.941117135 |
| C49  | -1.562035640 | 2.222769329  | -7.407217406 |
| C50  | -1.354850377 | 3.224159326  | -6.263006123 |
| C51  | 0.050868109  | 4.032496068  | -4.423290741 |
| C52  | 0.299247312  | 5.436775583  | -5.014009384 |
| C53  | 1.336569816  | 3.671319816  | -3.661489889 |
| C54  | 1.421709827  | 2.338503848  | -2.985979373 |
| C55  | 0.462869686  | 1.482035896  | -2.488789895 |
| C56  | 2.478568622  | 0.661511561  | -2.087394313 |
| C57  | 1.560787112  | 6.651967040  | -6.754727386 |
| C58  | 0.384792423  | 7.450770830  | -7.314605131 |
| C59  | 2.533149190  | 6.247295957  | -7.881928642 |
| C60  | 3.416763259  | 7.328234574  | -8.430279963 |
| C61  | 3.323426287  | 8.703172441  | -8.344918977 |
| C62  | 5.139743070  | 8.121153209  | -9.472701307 |
| C63  | -3.673257681 | 3.465375651  | 8.290009222  |
| C64  | -4.283866870 | 2.423051879  | 9.208190934  |
| C65  | -3.460786907 | 2.786764184  | 6.913325439  |
| C66  | -2.890873309 | 3.729072935  | 5.877530239  |
| C67  | -3.718337472 | 4.531851419  | 5.071513311  |
| C68  | -1.498869912 | 3.842195626  | 5.706953346  |
| C69  | -3.182269188 | 5.419056830  | 4.132086605  |
| C70  | -0.949708275 | 4.730081011  | 4.783936173  |
| C71  | -1.791545654 | 5.518130736  | 3.995132563  |
| C72  | 4.550504293  | 5.253761710  | 6.065052486  |
| C73  | 5.479700884  | 5.877574183  | 5.016867893  |
| C74  | 3.517286984  | 4.345486233  | 5.381486484  |
| C75  | 7.753613170  | 5.918782576  | 4.080075029  |
| C76  | 7.648009886  | 5.372496122  | 2.656176158  |
| C77  | 6.543147038  | 3.764358738  | 1.144513537  |
| C78  | 5.326691527  | 4.461238915  | 0.490283501  |
| C79  | 6.385635209  | 2.235478453  | 1.250592490  |
| C80  | 6.210463967  | 1.465737232  | -0.063846932 |
| C81  | 7.424050135  | 1.447403739  | -1.008411147 |
| C82  | 8.387264317  | 3.367718047  | -2.284534294 |
| C83  | 3.046640590  | 5.299486194  | 0.739682490  |
| C84  | 3.128789251  | 6.826798566  | 0.587476102  |
| C85  | 1.794878860  | 4.974649740  | 1.580048188  |
| C86  | 3.725735531  | 8.892189282  | 1.746617513  |
| C87  | 4.768180305  | 9.869325168  | 1.219321149  |
| C88  | 6.872724136  | 10.189701336 | -0.001536569 |
| C89  | 6.571836049  | 11.015050031 | -1.268869808 |
| C90  | 8.168117016  | 9.366537989  | -0.155045970 |
| C91  | 8.083722403  | 8.335203879  | -1.277300469 |
| C92  | 5.219619621  | 11.201373750 | -3.303627886 |
| C93  | 4.808475744  | 12.659858046 | -3.157479600 |
| C94  | 4.074417033  | 10.417361367 | -3.998645902 |
| C95  | 4.432698807  | 8.964296415  | -4.215364336 |
| C96  | 5.232186682  | 8.583825359  | -5.303334586 |
| C97  | 4.027426399  | 7.972297743  | -3.305572734 |
| C98  | 5.624394308  | 7.255575234  | -5.479930796 |
| C99  | 4.430987755  | 6.641535952  | -3.454039676 |
| C100 | 5.225367374  | 6.297493778  | -4.545583358 |
| C101 | 5.281002490  | -7.933252273 | 4.785672979  |
| C102 | 5.150091191  | -7.487079513 | 3.339790445  |
| C103 | 4.850416550  | -5.543267443 | 1.835686563  |
| C104 | 5.970767254  | -4.579851699 | 1.424466538  |
| C105 | 6.963089759  | -2.377215315 | 1.848735059  |
| C106 | 7.533988629  | -1.621829847 | 3.047348596  |
| C107 | 7.286709768  | -0.907726617 | 5.377998105  |
| C108 | 7.927912208  | -1.717437819 | 6.485216226  |
| C109 | 6.345370407  | -7.808433501 | -1.763324693 |
| C110 | 6.677619907  | -6.769285232 | -2.843644922 |
| C111 | 4.814779042  | -7.835058987 | -1.535811634 |
| C112 | 4.372880297  | -9.129291371 | -0.826573447 |
| C113 | 2.956472293  | -9.009018133 | -0.305418767 |
| C114 | 7.073431495  | -4.414775055 | -3.386752482 |
| C115 | 8.150930901  | -3.468935067 | -2.892399461 |
| C116 | 5.765913400  | -3.724868220 | -3.851584440 |
| C117 | 4.866324178  | -3.400796637 | -2.689654575 |
| C118 | 5.107014235  | -2.274489891 | -1.885115348 |
| C119 | 3.846516387  | -4.292127269 | -2.314965080 |
| C120 | 4.387383669  | -2.084080741 | -0.701557771 |
| C121 | 3.128690600  | -4.104292714 | -1.128354254 |
| C122 | 3.423285858  | -3.015425091 | -0.304225445 |
| C123 | -0.453365226 | -7.587041589 | 7.934136480  |

|       |              |               |              |
|-------|--------------|---------------|--------------|
| C124  | -1.525442999 | -7.214048006  | 8.973057193  |
| C125  | -1.030381336 | -7.968407075  | 6.560557191  |
| C126  | -0.027988746 | -8.177618294  | 5.466174593  |
| C127  | 0.723675749  | -9.311275031  | 5.229320911  |
| C128  | 1.069250326  | -7.846663014  | 3.606465254  |
| C129  | -3.752559035 | -7.551039644  | 9.907921613  |
| C130  | -3.236709681 | -7.681132035  | 11.322157974 |
| C131  | -3.711452006 | -5.983050208  | 0.201866654  |
| C132  | -3.908225708 | -5.652611276  | 1.653978396  |
| C133  | -3.076816856 | -6.565351143  | 2.645392406  |
| C134  | -3.462001951 | -8.057645718  | 2.429052361  |
| C135  | -2.802814325 | -8.979007133  | 3.469029152  |
| C136  | -3.307043137 | -10.392306190 | 3.442086089  |
| C137  | -3.548197159 | -6.180329984  | 4.083403313  |
| C138  | 0.976491466  | -1.816545179  | 3.832425224  |
| Fe139 | 1.662333671  | -3.688670812  | 4.114007186  |
| Fe140 | 0.753256917  | -0.135568069  | 2.447593392  |
| Fe141 | 0.770644158  | -0.502579384  | 5.262903327  |
| Fe142 | 2.865580307  | -1.435741992  | 4.171996083  |
| Fe143 | 2.937339346  | 1.207073452   | 4.309616941  |
| Fe144 | -0.534599089 | -2.628040157  | 4.879590291  |
| Fe145 | -0.105105443 | -2.995937863  | 2.321217570  |
| H146  | -2.836327729 | -5.704346742  | -6.171562364 |
| H147  | -1.206766463 | -5.599742693  | -6.293112973 |
| H148  | -1.841404896 | -3.330991146  | -9.792130508 |
| H149  | -1.280451768 | -5.281419201  | -8.635619092 |
| H150  | -3.000642499 | -5.651625291  | -8.635905364 |
| H151  | -1.920266144 | -1.027167352  | -8.193263951 |
| H152  | -4.731484400 | -2.679731137  | -9.678143755 |
| H153  | -2.226684767 | -1.075370053  | -9.942588525 |
| H154  | -6.995333285 | -2.201187592  | -9.466936690 |
| H155  | -5.289906032 | -2.987177164  | -7.110716946 |
| H156  | -6.589233866 | -0.480748088  | -9.249870262 |
| H157  | -3.598743240 | -0.182320901  | -3.131443662 |
| H158  | -3.860117995 | -1.656230941  | -5.589940348 |
| H159  | -5.840287855 | -3.562975103  | -4.918959010 |
| H160  | -5.036319134 | 3.658931488   | -5.499363125 |
| H161  | -4.789114778 | 0.890348294   | -6.373340857 |
| H162  | -7.328257816 | -2.586504886  | -5.001543229 |
| H163  | -2.638073538 | 0.052855179   | -4.612013252 |
| H164  | -7.491103118 | 1.005368661   | -5.966385674 |
| H165  | -5.718526646 | 2.922757662   | -6.971903710 |
| H166  | -5.303667526 | -0.895239639  | -0.848024138 |
| H167  | -3.565197143 | -0.886826713  | -0.473417320 |
| H168  | -4.749770774 | -0.764701039  | 0.843543382  |
| H169  | -4.255730426 | 1.332907090   | -1.351930329 |
| H170  | -9.767221242 | 1.138038324   | -5.656405358 |
| H171  | -3.000590592 | 4.326181547   | -1.857723754 |
| H172  | -7.375073357 | 4.772157238   | -2.823148097 |
| H173  | -5.610662069 | 7.762347586   | -2.512314004 |
| H174  | -2.421321132 | 1.244231121   | 0.290072388  |
| H175  | -3.558253703 | 1.376729126   | 1.643795217  |
| H176  | -4.419065984 | 4.272302198   | 8.155418749  |
| H177  | -2.424325910 | 5.785881104   | -2.694211256 |
| H178  | -3.918869974 | 7.749424810   | -3.067294682 |
| H179  | -2.734739715 | 5.830872481   | -0.941294756 |
| H180  | -4.286160117 | 7.874298373   | -1.329669343 |
| H181  | -4.864849186 | 5.445391450   | -3.128943891 |
| H182  | -5.109941047 | 5.698093029   | -0.085094774 |
| H183  | -5.184068990 | 3.377775094   | -1.858259718 |
| H184  | -3.331520912 | 2.747980771   | 0.525510149  |
| H185  | 1.860812228  | 3.928814734   | 1.916199584  |
| H186  | 0.920038928  | 5.071499929   | 0.921657714  |
| H187  | 0.732702200  | 6.104124924   | 2.772418632  |
| H188  | -1.872947201 | 6.825655095   | 2.561196543  |
| H189  | 0.130827986  | 4.783192597   | 4.642841888  |
| H190  | -0.828667386 | 3.203213282   | 6.284439547  |
| H191  | -4.805241408 | 4.465238116   | 5.173650511  |
| H192  | -6.818387718 | 1.430397544   | -1.903659950 |
| H193  | -8.853661630 | -1.096963670  | -1.703701611 |
| H194  | -9.922604818 | 0.279860469   | -1.355157252 |
| H195  | -7.888042327 | 0.145025449   | -3.515259765 |
| H196  | -9.618219368 | 2.836540992   | -5.149887728 |
| H197  | -3.842894042 | 6.021045191   | 3.503290993  |
| H198  | -6.207471045 | 1.346634596   | 1.004570150  |
| H199  | -9.047158493 | 7.032273615   | -2.629047432 |
| H200  | -9.562551418 | 5.378749812   | -3.053656585 |
| H201  | -9.509206269 | 5.109643753   | -0.290045538 |
| H202  | -8.615368288 | -3.768742319  | 10.140617474 |
| H203  | 0.084511625  | -6.929404828  | -1.915557247 |

|      |              |              |               |
|------|--------------|--------------|---------------|
| H204 | -5.185865421 | -7.217088597 | 0.355789391   |
| H205 | 4.407142764  | -9.966179076 | -1.538860560  |
| H206 | 5.057469227  | -9.353412460 | 0.004677651   |
| H207 | 4.291519963  | -7.763962347 | -2.502513733  |
| H208 | 8.921055814  | -3.953906625 | -2.246747771  |
| H209 | 6.620140372  | -8.763700823 | -2.237682931  |
| H210 | 1.224337789  | -2.860596464 | -3.252891444  |
| H211 | -1.496227815 | -4.073150194 | -4.037559053  |
| H212 | 6.756365727  | -5.247433547 | -1.435739343  |
| H213 | 7.529749468  | -4.896263258 | -4.276008902  |
| H214 | 6.950340744  | -6.822084966 | -0.036976976  |
| H215 | -0.994043201 | -5.671164031 | -1.358131734  |
| H216 | 4.524329022  | -6.950325770 | -0.949522272  |
| H217 | 7.046624128  | -8.461313307 | 0.049607348   |
| H218 | 1.260422516  | -3.812307308 | -6.778696442  |
| H219 | -0.224314191 | -1.858939002 | -3.411327883  |
| H220 | 3.726187217  | -8.522372976 | 1.432285680   |
| H221 | -1.146901070 | -3.672692023 | -2.360536678  |
| H222 | -0.803685487 | 4.132585524  | -3.738568409  |
| H223 | -0.620180314 | 1.537592895  | -2.463726050  |
| H224 | -1.945728084 | 2.804178916  | -8.254962581  |
| H225 | 0.002175853  | 0.786793658  | -7.223468422  |
| H226 | 1.324883326  | 4.532279414  | -6.551177614  |
| H227 | 2.593459628  | 9.357452558  | -7.879863280  |
| H228 | -0.413386872 | 6.813567130  | -7.768373586  |
| H229 | 1.959915328  | 5.771300077  | -8.697923148  |
| H230 | 2.075434882  | 7.267196310  | -5.999551311  |
| H231 | 6.063651760  | 8.232118788  | -10.033721797 |
| H232 | 1.488931316  | 4.469460002  | -2.916021660  |
| H233 | 2.184551560  | 3.737353418  | -4.360394742  |
| H234 | 4.667425452  | 10.169375342 | -9.133309538  |
| H235 | 3.188973257  | 5.460303925  | -7.475163055  |
| H236 | 0.326094049  | 2.232200170  | -5.563791441  |
| H237 | -2.352738352 | 1.516237569  | -7.115413598  |
| H238 | 2.358519689  | 1.917494385  | -9.549705829  |
| H239 | 3.241825684  | -0.024865843 | -1.735542530  |
| H240 | 1.476816627  | 0.461260675  | -10.049840178 |
| H241 | 0.782492538  | -0.343116262 | -1.364992766  |
| H242 | -2.572811856 | 4.555280908  | 9.632196506   |
| H243 | -1.881794664 | 4.448356790  | 8.156061526   |
| H244 | 4.204161014  | 4.247225479  | 2.233005708   |
| H245 | 2.893138701  | 4.896226673  | -0.271998957  |
| H246 | 4.316775463  | 6.931424490  | 2.254426531   |
| H247 | 4.199484566  | 2.341520373  | -3.292602482  |
| H248 | 5.252673103  | 1.521890525  | -5.086687647  |
| H249 | 5.017348019  | 3.493243942  | -4.044271580  |
| H250 | 4.779906123  | -0.779477710 | -4.921333258  |
| H251 | 4.801899140  | -0.806750892 | -6.703581605  |
| H252 | 8.396840282  | 8.898858832  | 0.814170885   |
| H253 | 8.977586224  | 10.067419664 | -0.401445003  |
| H254 | 8.004449764  | 6.732583669  | 0.093529930   |
| H255 | 7.809141423  | 6.333318893  | -1.600591842  |
| H256 | 10.345559652 | 3.899119124  | -1.966450212  |
| H257 | 7.451026384  | 0.498918129  | -1.567934045  |
| H258 | 6.232917926  | 6.967596651  | -6.341093600  |
| H259 | 3.380733533  | 8.224577140  | -2.459384034  |
| H260 | 7.223540745  | 4.564575806  | -3.485269156  |
| H261 | 5.520687010  | 2.005329734  | 1.893117241   |
| H262 | 6.256530438  | 3.973598799  | 3.252301152   |
| H263 | 5.320121820  | 1.813732189  | -0.610865435  |
| H264 | 2.160424311  | -0.608557783 | -8.104822731  |
| H265 | 8.757803212  | 5.684323288  | 4.458166206   |
| H266 | 2.799150402  | -2.039895079 | -5.729436973  |
| H267 | 7.277572714  | 1.851963377  | 1.772943089   |
| H268 | 4.150831838  | 5.891860842  | -2.714379423  |
| H269 | 5.985081679  | 4.819905038  | -5.565585287  |
| H270 | 7.675721685  | 7.012331056  | 3.994529341   |
| H271 | 9.916069797  | 2.326661319  | -1.370190869  |
| H272 | 8.918631148  | 4.820795104  | -3.609623587  |
| H273 | 1.297420113  | -4.515800995 | -5.268208622  |
| H274 | -0.515076376 | -2.674933545 | -5.767863402  |
| H275 | 5.555646105  | 9.334095120  | -6.028374055  |
| H276 | 2.832403062  | 0.719093191  | -4.907339521  |
| H277 | 7.396246780  | 4.019182691  | 0.502067702   |
| H278 | 8.350404956  | 1.498065845  | -0.421380744  |
| H279 | 6.002891746  | 0.422483292  | 0.213928459   |
| H280 | 6.508612610  | 2.636136315  | -2.531760641  |
| H281 | 2.761419784  | 9.198284886  | 1.313743153   |
| H282 | 5.805394843  | 8.337265007  | 0.341564872   |
| H283 | 7.043514715  | 10.941173209 | 0.783107247   |

|      |               |               |              |
|------|---------------|---------------|--------------|
| H284 | 3.672907822   | 9.044421120   | 2.834012348  |
| H285 | 5.044364217   | 9.747939201   | -1.744017926 |
| H286 | 5.769874892   | -7.148844511  | 5.381358710  |
| H287 | 4.242566139   | -8.025924304  | 5.165822722  |
| H288 | 0.168376361   | -6.687447074  | 7.817406641  |
| H289 | 5.927303566   | -9.587158287  | 5.789385438  |
| H290 | 5.666318980   | -9.837941251  | 4.190888565  |
| H291 | 2.924720316   | 3.841699705   | 6.156270814  |
| H292 | 3.380164323   | 6.921197938   | 6.201523215  |
| H293 | 7.027220799   | 4.694595046   | 5.675446009  |
| H294 | 2.846262556   | 4.962704571   | 4.766499764  |
| H295 | 4.525122671   | 6.842099512   | 7.366759751  |
| H296 | 6.429934270   | -0.346915977  | 5.782519539  |
| H297 | 5.148358293   | 4.648035888   | 6.765251792  |
| H298 | -8.332719694  | -3.042003010  | 4.213109549  |
| H299 | -7.344345862  | -5.184777051  | 6.167674280  |
| H300 | 5.983010397   | -2.202869965  | 4.310337798  |
| H301 | -3.014202371  | 1.656360302   | 4.460100075  |
| H302 | 7.804414331   | -2.823023666  | 1.304692726  |
| H303 | 2.342664793   | -4.805005681  | -0.836281190 |
| H304 | 6.528498345   | -1.609353762  | 1.186587136  |
| H305 | -6.325350114  | -1.396351658  | 3.471018111  |
| H306 | 5.186447962   | -3.246702990  | 2.750187794  |
| H307 | -5.230610557  | -2.780864575  | 3.485832981  |
| H308 | -7.061195872  | -4.254373256  | 3.937759266  |
| H309 | -5.756106274  | -3.184622061  | 5.899129424  |
| H310 | -6.940434509  | -1.859303188  | 5.871045333  |
| H311 | 5.256938825   | -4.402809996  | -4.550669902 |
| H312 | -9.936946290  | -4.991842959  | 4.673616294  |
| H313 | -9.941010203  | -7.864459549  | 3.605616890  |
| H314 | 2.898933949   | -2.881031757  | 0.640856809  |
| H315 | -12.089594835 | -6.342289183  | 4.867249360  |
| H316 | -11.893258860 | -6.767015332  | 3.297582564  |
| H317 | -3.728186642  | -1.677686657  | 4.908755572  |
| H318 | 4.561983507   | -1.213835980  | -0.064164458 |
| H319 | 3.626651380   | -5.151003519  | -2.953425464 |
| H320 | -5.155968301  | -9.121994637  | 6.957748234  |
| H321 | -1.604151822  | -8.905881538  | 6.666722329  |
| H322 | -5.238779471  | -6.935855329  | 5.904188096  |
| H323 | -4.488189205  | -10.323489140 | 6.244919185  |
| H324 | 8.223036723   | -2.758713308  | 6.204901492  |
| H325 | -3.226044993  | -4.538444265  | 6.126098327  |
| H326 | -4.971503086  | -5.719424925  | 1.930677888  |
| H327 | 5.015326496   | -5.526097167  | 3.938978518  |
| H328 | -4.557866865  | -8.151024664  | 2.500299315  |
| H329 | 2.022526311   | -9.733666597  | 3.576148537  |
| H330 | 1.438046702   | -7.421632199  | 2.679705165  |
| H331 | -10.706291235 | -8.220026057  | 5.157643727  |
| H332 | -2.390011638  | 0.092753160   | 4.903486681  |
| H333 | -4.849982970  | -4.557572439  | 7.890627783  |
| H334 | -2.773276916  | -3.309555406  | 6.962430953  |
| H335 | -7.215630673  | -4.255403410  | 8.153719496  |
| H336 | -6.327677038  | 0.607476436   | 3.971803272  |
| H337 | -3.471110910  | -11.913033465 | 2.330634586  |
| H338 | -1.715828041  | -8.984105973  | 3.293140217  |
| H339 | -2.976772494  | -8.604682034  | 4.484257307  |
| H340 | -3.148711413  | -8.364820110  | 1.420631853  |
| H341 | 3.883774471   | -5.016771195  | 1.877776445  |
| H342 | 5.881128261   | -1.563557786  | -2.182900580 |
| H343 | 6.056346078   | -2.820416728  | -4.406257997 |
| H344 | -3.553061669  | -4.626741487  | 1.816644438  |
| H345 | -5.622308851  | -5.905688728  | 7.823741369  |
| H346 | -6.633031736  | -7.374392080  | 6.440777018  |
| H347 | -5.221618520  | 1.883157445   | 3.677572188  |
| H348 | 0.820445408   | -10.235796424 | 5.786558704  |
| H349 | -1.730248101  | -7.185410416  | 6.240900487  |
| H350 | 4.796743303   | -6.339350191  | 1.090304478  |
| H351 | 8.034443102   | -0.174692180  | 5.031322383  |
| H352 | -4.436218340  | 2.396009149   | 6.584853171  |
| H353 | -2.781160841  | 1.930888298   | 7.053613987  |
| H354 | 0.826784908   | -8.340882306  | 9.347137107  |
| H355 | -0.166827702  | -9.472458318  | 8.704131913  |
| H356 | -4.559287049  | -8.290436335  | 9.783597641  |
| H357 | -2.986151983  | -8.443197471  | 8.131964167  |
| H358 | -2.365579818  | -8.365795511  | 11.450538610 |
| H359 | -4.196192062  | -6.551836624  | 9.764988358  |
| H360 | -3.535261209  | 1.766797535   | 9.713599097  |
| H361 | 4.332820307   | 12.919358942  | -2.181898750 |
| H362 | -9.725544033  | -2.870050158  | 9.070638271  |
| H363 | -7.483545350  | -1.309511178  | 8.687026820  |

|       |               |              |              |
|-------|---------------|--------------|--------------|
| H364  | 6.116554264   | 11.168038381 | -3.944238127 |
| H365  | 3.159592476   | 10.498834573 | -3.391321206 |
| H366  | 3.880532117   | 10.917074496 | -4.959214552 |
| H367  | -0.924779327  | 0.159207752  | 2.667030364  |
| H368  | -0.659176634  | -1.286309557 | 0.172084986  |
| H369  | -0.984300603  | -3.512247448 | 1.207489145  |
| H370  | -0.904633822  | -0.636707469 | 2.519826071  |
| Mo371 | -0.695589666  | -5.118390042 | 3.835726413  |
| N372  | -2.046284303  | -5.911771889 | -6.788303535 |
| N373  | -2.353886476  | -2.932137504 | -9.009411471 |
| N374  | -4.970351728  | -1.828971335 | -9.174760804 |
| N375  | -6.088335725  | -2.508393899 | -6.695037923 |
| N376  | -4.342583678  | -1.114579606 | -4.870609127 |
| N377  | -4.920903985  | 1.565206028  | -5.616521350 |
| N378  | -7.815118040  | 1.805237663  | -5.416893113 |
| N379  | -8.649299396  | 0.562874010  | -2.971474529 |
| N380  | -6.918953469  | 1.230137153  | -0.911146755 |
| N381  | -5.516712626  | 3.891648601  | -1.039321908 |
| N382  | -7.708463144  | 5.448471862  | -2.133202768 |
| N383  | -11.394193999 | -6.434679112 | 4.123716531  |
| N384  | -9.127679025  | -5.408938006 | 5.145256246  |
| N385  | -4.558042427  | -1.163110013 | 4.592787269  |
| N386  | -5.366169734  | 0.885933535  | 3.802179535  |
| N387  | -3.123902360  | 0.645279290  | 4.403955307  |
| N388  | -8.140617669  | -3.777112026 | 8.082881985  |
| N389  | 1.427712052   | -3.630237912 | -5.785867623 |
| N390  | -0.294974283  | -5.991091210 | -2.030799015 |
| N391  | 2.323537156   | -1.127436739 | -5.764605384 |
| N392  | 2.185654386   | 0.407648108  | -8.095812055 |
| N393  | -0.386153928  | 1.497502836  | -7.852835579 |
| N394  | -0.258538018  | 3.061944071  | -5.470438589 |
| N395  | 2.678425765   | 1.805678276  | -2.735168178 |
| N396  | 1.154408292   | 0.424209056  | -1.935758902 |
| N397  | 1.053552774   | 5.429446593  | -6.148943129 |
| N398  | 4.554178404   | 6.976677987  | -9.140530825 |
| N399  | 4.430000765   | 9.188872478  | -9.010698450 |
| N400  | -2.398806757  | 3.910451398  | 8.857364846  |
| N401  | 3.842737245   | 6.276979162  | 6.852081107  |
| N402  | 6.768791877   | 5.432212561  | 5.025064825  |
| N403  | 6.837582122   | 4.311045165  | 2.468112102  |
| N404  | 7.390339392   | 2.545883248  | -1.979333727 |
| N405  | 9.631950789   | 3.197633284  | -1.802433455 |
| N406  | 8.146127320   | 4.463441412  | -3.052067000 |
| N407  | 4.252312932   | 4.690232634  | 1.293564163  |
| N408  | 3.939203256   | 7.478762470  | 1.474508296  |
| N409  | 5.759328935   | 9.352535174  | 0.435922877  |
| N410  | 7.923742037   | 7.047435256  | -0.881003977 |
| N411  | 5.504736446   | 10.617445662 | -2.004048818 |
| N412  | 6.060670702   | -9.173667173 | 4.863727736  |
| N413  | 5.107520423   | -6.157419707 | 3.132720268  |
| N414  | 5.989671936   | -3.419102260 | 2.109643544  |
| N415  | 6.880714491   | -1.706360486 | 4.236639268  |
| N416  | 7.191869717   | -7.664108145 | -0.574348512 |
| N417  | 6.878725014   | -5.488346998 | -2.425436858 |
| N418  | 0.410448114   | -8.658971623 | 8.467127754  |
| N419  | 0.205656923   | -7.267424256 | 4.436225737  |
| N420  | 1.408220494   | -9.081126572 | 4.055951691  |
| N421  | -2.728227237  | -7.850148779 | 8.919086355  |
| N422  | 0.546012167   | 2.146353496  | 0.594341405  |
| N423  | 0.660261868   | 1.271288635  | 1.297632319  |
| O424  | -3.086071017  | -3.234035249 | -6.874331752 |
| O425  | -4.202504513  | 0.018098382  | -8.088728868 |
| O426  | -7.610883825  | -0.820989147 | -6.953349810 |
| O427  | -6.177036318  | -0.892429153 | -3.543655858 |
| O428  | -4.404372561  | 2.181576144  | -3.484501055 |
| O429  | -7.396145189  | 3.918434397  | -4.660591274 |
| O430  | -10.538817293 | 1.866059160  | -3.009342383 |
| O431  | -8.162482620  | 0.052036253  | 0.624414240  |
| O432  | -6.191170080  | 3.805251574  | 1.141102242  |
| O433  | -7.286401015  | 6.848499273  | -0.397922334 |
| O434  | -10.846992350 | 6.567787819  | -0.795134866 |
| O435  | -8.330424672  | -7.473955926 | 5.814450011  |
| O436  | -9.888544130  | -3.168709790 | 6.722981510  |
| O437  | -7.939380976  | -1.294952092 | 10.676998291 |
| O438  | 0.224129224   | -0.225479897 | -5.557423340 |
| O439  | 0.750428705   | -5.789763141 | -4.038048481 |
| O440  | 2.653645493   | 2.273550041  | -6.870115903 |
| O441  | 5.390360500   | 0.967795476  | -5.904968790 |
| O442  | -0.035324491  | 2.790920616  | -9.720078541 |
| O443  | -2.166318892  | 4.144161826  | -6.096670487 |

|                   |        |              |                                       |               |               |
|-------------------|--------|--------------|---------------------------------------|---------------|---------------|
|                   | O444   | -0.065936475 | 6.470350291                           | -4.445950920  |               |
|                   | O445   | 0.302435429  | 8.667437842                           | -7.305876670  |               |
|                   | O446   | -5.485478624 | 2.275132723                           | 9.379293437   |               |
|                   | O447   | -1.191927600 | 6.362370824                           | 3.082429160   |               |
|                   | O448   | 5.091036435  | 6.745272020                           | 4.214081063   |               |
|                   | O449   | 8.323897486  | 5.914364769                           | 1.756104888   |               |
|                   | O450   | 5.366513992  | 4.793138617                           | -0.704905071  |               |
|                   | O451   | 2.434486507  | 7.410379542                           | -0.256714701  |               |
|                   | O452   | 1.674725160  | 5.850797983                           | 2.707471275   |               |
|                   | O453   | 4.686475620  | 11.073886848                          | 1.493310852   |               |
|                   | O454   | 7.270518796  | 11.993998343                          | -1.566169580  |               |
|                   | O455   | 8.115822508  | 8.677700049                           | -2.469997465  |               |
|                   | O456   | 4.934573379  | 13.481501949                          | -4.051427503  |               |
|                   | O457   | 5.637529701  | 4.964776227                           | -4.664725386  |               |
|                   | O458   | 5.058217757  | -8.340829637                          | 2.420536239   |               |
|                   | O459   | 6.794287844  | -4.872437171                          | 0.529339550   |               |
|                   | O460   | 8.545511718  | -0.921657920                          | 2.873468944   |               |
|                   | O461   | 8.129165204  | -1.275059262                          | 7.605208658   |               |
|                   | O462   | 6.724645281  | -7.089335839                          | -4.043485251  |               |
|                   | O463   | 1.958104475  | -9.188406351                          | -0.992481615  |               |
|                   | O464   | 2.830277125  | -8.645275235                          | 0.991303789   |               |
|                   | O465   | 8.232106830  | -2.286695361                          | -3.194006085  |               |
|                   | O466   | -1.262715266 | -6.429511269                          | 9.904520509   |               |
|                   | O467   | -3.772554244 | -7.146812319                          | 12.283438666  |               |
|                   | O468   | -2.867525000 | -5.495598163                          | -0.536129800  |               |
|                   | O469   | -4.559242577 | -6.921921981                          | -0.332136071  |               |
|                   | O470   | -3.834235195 | -10.980198783                         | 4.384605221   |               |
|                   | O471   | -3.116027607 | -11.002980462                         | 2.243328139   |               |
|                   | O472   | -2.627738551 | -5.744452840                          | 4.876547862   |               |
|                   | O473   | -4.749115253 | -6.346686416                          | 4.407423621   |               |
|                   | O474   | -1.723174180 | -6.366592165                          | 2.488531828   |               |
|                   | O475   | -5.598546914 | -5.044208623                          | 8.320092780   |               |
|                   | O476   | -3.559575052 | -3.853088507                          | 6.759795187   |               |
|                   | O477   | 5.102232687  | 2.575396243                           | -3.704922544  |               |
|                   | O478   | -4.814331249 | -10.036768942                         | 7.123429089   |               |
|                   | O479   | -5.681946421 | -7.325042096                          | 6.715786098   |               |
|                   | S480   | 4.263351825  | 3.068514286                           | 4.261029080   |               |
|                   | S481   | 3.156892710  | -0.052128739                          | 2.427095848   |               |
|                   | S482   | 1.087390403  | -4.849299392                          | 2.270191692   |               |
|                   | S483   | 0.677204459  | 1.453252870                           | 4.230122927   |               |
|                   | S484   | 0.570373375  | -1.638843721                          | 0.652452031   |               |
|                   | S485   | 3.848326254  | -3.427405385                          | 4.516720205   |               |
|                   | S486   | -2.046042281 | -3.171159509                          | 3.330933881   |               |
|                   | S487   | 2.858779431  | -0.176652232                          | 6.050509695   |               |
|                   | S488   | 0.386747048  | -4.408758937                          | 5.839610789   |               |
|                   | S489   | -1.099761902 | -1.049054277                          | 6.329647887   |               |
| <b>11 (S=3/2)</b> |        |              | <b>bm202b2n2x6x2h2nconexhta.car_3</b> |               |               |
| Fe(139)           | 2.304  | C1           | -3.454693630                          | 0.177771355   | -9.313024599  |
| Fe(140)           | 0.048  | C2           | -3.777683199                          | 1.214921843   | -8.233437687  |
| Fe(141)           | 2.838  | C3           | -3.877695951                          | 3.599330670   | -7.648541023  |
| Fe(142)           | -2.647 | C4           | -5.291884961                          | 3.687246051   | -7.078006924  |
| Fe(143)           | 3.202  | C5           | -7.670106027                          | 3.215445947   | -7.362997643  |
| Fe(144)           | -2.317 | C6           | -7.869993645                          | 2.221853952   | -6.209920010  |
| Fe(145)           | -1.025 | C7           | -7.124504979                          | 0.123579566   | -5.183878702  |
|                   |        | C8           | -6.341279979                          | 0.620817439   | -3.964820230  |
|                   |        | C9           | -4.397119143                          | 1.833263366   | -3.123722730  |
|                   |        | C10          | -5.179950888                          | 2.872295553   | -2.306927829  |
|                   |        | C11          | -6.747594122                          | 4.736275658   | -2.323345827  |
|                   |        | C12          | -8.016255818                          | 4.186675317   | -1.6544445969 |
|                   |        | C13          | -10.109805984                         | 2.951337386   | -1.947893594  |
|                   |        | C14          | -10.169709334                         | 1.710644459   | -1.049283226  |
|                   |        | C15          | -9.202661940                          | -0.489570075  | -0.532461868  |
|                   |        | C16          | -8.119243095                          | -0.642396762  | 0.538764237   |
|                   |        | C17          | -5.863042113                          | 0.033856134   | 1.271721343   |
|                   |        | C18          | -5.792239176                          | 1.090073596   | 2.388624550   |
|                   |        | C19          | -4.569730612                          | -0.023392505  | 0.410692795   |
|                   |        | C20          | -3.285029841                          | 0.085441649   | 1.238779430   |
|                   |        | C21          | -4.560909317                          | -1.289893627  | -0.452290989  |
|                   |        | C22          | -6.034442300                          | 3.496793555   | 2.950161569   |
|                   |        | C23          | -7.493384764                          | 3.751070942   | 3.381691101   |
|                   |        | C24          | -5.354442097                          | 4.768288233   | 2.386392407   |
|                   |        | C25          | -5.550441206                          | 5.967374237   | 3.322054059   |
|                   |        | C26          | -3.862894924                          | 4.516157136   | 2.138080007   |
|                   |        | C27          | -9.791324503                          | 4.196096286   | 2.736615706   |
|                   |        | C28          | -10.372481464                         | 3.197086025   | 3.715686666   |
|                   |        | C29          | -8.724754068                          | -10.108547367 | 0.228240643   |
|                   |        | C30          | -7.481897750                          | -9.819841130  | 1.068687560   |
|                   |        | C31          | -6.485540357                          | -8.132720196  | 2.622233010   |
|                   |        | C32          | -6.977821757                          | -8.257374742  | 4.078103872   |



|      |              |              |              |
|------|--------------|--------------|--------------|
| C33  | -6.158943112 | -6.677444306 | 2.247934610  |
| C34  | -5.087125109 | -6.036043429 | 3.131965404  |
| C35  | -4.584641568 | -4.734769457 | 2.507709563  |
| C36  | -3.543879300 | -2.824581548 | 3.747283307  |
| C37  | -6.432972127 | -9.094423320 | 6.318140658  |
| C38  | -5.623639592 | -8.256600538 | 7.285779082  |
| C39  | -0.386868689 | 0.981135523  | -6.022408521 |
| C40  | -0.155015640 | 2.424433335  | -5.538944476 |
| C41  | -0.205873518 | 0.037467478  | -4.809120547 |
| C42  | -0.750150975 | -1.398039591 | -4.977885429 |
| C43  | 0.227962763  | -2.405920659 | -5.575885209 |
| C44  | 1.662637260  | 4.055454178  | -5.149186058 |
| C45  | 1.155871135  | 5.406623420  | -5.656568372 |
| C46  | 3.204777138  | 4.016709913  | -5.193364910 |
| C47  | -0.513918309 | 6.586582856  | -6.993847992 |
| C48  | -1.664473273 | 6.912178976  | -6.028457466 |
| C49  | -3.142798349 | 6.119798972  | -4.240500303 |
| C50  | -2.836271479 | 6.360743321  | -2.761961027 |
| C51  | -1.283782513 | 6.082977850  | -0.883676470 |
| C52  | -1.070184002 | 7.513768861  | -0.367259644 |
| C53  | 0.005051592  | 5.302877595  | -0.561235869 |
| C54  | 0.009850702  | 3.894560166  | -1.055235496 |
| C55  | -0.962739346 | 2.920485100  | -1.174882830 |
| C56  | 0.851785255  | 2.016974515  | -1.892806876 |
| C57  | -0.046885791 | 9.687518395  | -0.883403996 |
| C58  | -1.182549089 | 10.429397851 | -0.184350962 |
| C59  | 0.367452724  | 10.422670136 | -2.179817864 |
| C60  | 1.180830882  | 11.674510630 | -2.024429803 |
| C61  | 1.087875270  | 12.711906301 | -1.116616209 |
| C62  | 2.729465024  | 13.091994202 | -2.555367669 |
| C63  | -2.228299736 | -3.461325899 | 8.806153508  |
| C64  | -2.727884074 | -4.894125273 | 8.815693812  |
| C65  | -2.388897375 | -2.929067458 | 7.356614503  |
| C66  | -2.012420442 | -1.471746586 | 7.232729946  |
| C67  | -2.964121526 | -0.455685510 | 7.428908422  |
| C68  | -0.695076663 | -1.092276498 | 6.919205389  |
| C69  | -2.614647182 | 0.895663935  | 7.324309763  |
| C70  | -0.329724210 | 0.251534523  | 6.822593494  |
| C71  | -1.292569505 | 1.243025830  | 7.022232871  |
| C72  | 4.758722728  | 1.088214228  | 7.739217409  |
| C73  | 5.531809444  | 2.349483473  | 7.331131272  |
| C74  | 3.883290762  | 0.592893180  | 6.575657631  |
| C75  | 7.686468483  | 3.261649216  | 6.583748119  |
| C76  | 7.427239305  | 3.758809557  | 5.159012455  |
| C77  | 6.365051646  | 3.309622139  | 2.979728657  |
| C78  | 5.025459867  | 4.075905877  | 2.973679472  |
| C79  | 6.328039199  | 2.068750766  | 2.070448431  |
| C80  | 5.990742065  | 2.318782672  | 0.595974166  |
| C81  | 7.067929392  | 3.059149251  | -0.221884439 |
| C82  | 7.556450686  | 5.500552069  | -0.037080704 |
| C83  | 2.729004222  | 4.243292500  | 3.772420314  |
| C84  | 2.691100962  | 5.533324191  | 4.612583248  |
| C85  | 1.601428910  | 3.322248707  | 4.258386693  |
| C86  | 3.311976607  | 6.539102397  | 6.751954141  |
| C87  | 4.220042174  | 7.759205344  | 6.875675748  |
| C88  | 6.060646809  | 9.083259772  | 5.923708322  |
| C89  | 5.526058317  | 10.448586751 | 5.442155062  |
| C90  | 7.368172511  | 8.714039771  | 5.186838780  |
| C91  | 7.125863503  | 8.489165996  | 3.698976988  |
| C92  | 3.859885586  | 11.626441169 | 4.080544197  |
| C93  | 3.430573385  | 12.648332704 | 5.125113921  |
| C94  | 2.645303597  | 11.257981165 | 3.187276011  |
| C95  | 3.031135099  | 10.337487739 | 2.051372272  |
| C96  | 3.592200511  | 10.856827166 | 0.874702125  |
| C97  | 2.889614336  | 8.944243207  | 2.158939429  |
| C98  | 4.015706496  | 10.017552677 | -0.156816805 |
| C99  | 3.326951438  | 8.086060319  | 1.144927621  |
| C100 | 3.889603975  | 8.634812757  | -0.006349828 |
| C101 | 6.391223452  | -8.510500424 | -1.878312145 |
| C102 | 5.935079603  | -7.317269135 | -2.701916385 |
| C103 | 5.291926730  | -4.927772345 | -2.614509157 |
| C104 | 6.233347644  | -3.730752602 | -2.482724602 |
| C105 | 6.859578140  | -1.831733389 | -1.044062878 |
| C106 | 7.821520716  | -1.920569841 | 0.140591753  |
| C107 | 8.494917793  | -3.105117771 | 2.177300904  |
| C108 | 9.406137940  | -4.313323007 | 2.170346427  |
| C109 | 6.596337969  | -4.315487447 | -6.988827774 |
| C110 | 6.987068372  | -2.837083706 | -7.121679470 |
| C111 | 5.103132578  | -4.445736911 | -6.605349407 |
| C112 | 4.593553708  | -5.887470593 | -6.795081388 |

|       |               |               |              |
|-------|---------------|---------------|--------------|
| C113  | 3.251293842   | -6.091999500  | -6.121312609 |
| C114  | 7.539520444   | -0.754259632  | -5.971137579 |
| C115  | 8.544116640   | -0.505167882  | -4.865808879 |
| C116  | 6.424526656   | 0.310256904   | -6.101248793 |
| C117  | 5.524984918   | 0.381834559   | -4.897825340 |
| C118  | 5.668000808   | 1.414749750   | -3.957549809 |
| C119  | 4.571308673   | -0.620823396  | -4.658716206 |
| C120  | 4.908145328   | 1.417058299   | -2.785128541 |
| C121  | 3.838688464   | -0.638417015  | -3.470050948 |
| C122  | 4.021282616   | 0.369655482   | -2.519286093 |
| C123  | 1.473966969   | -10.808809699 | 1.468884427  |
| C124  | 0.663656212   | -11.218752309 | 2.705947670  |
| C125  | 0.595291224   | -10.183096737 | 0.373736371  |
| C126  | 1.334844046   | -9.604467107  | -0.791352974 |
| C127  | 2.028022246   | -10.285385212 | -1.772337686 |
| C128  | 1.992012604   | -8.124095669  | -2.255446093 |
| C129  | -1.300764881  | -12.289057061 | 3.652653764  |
| C130  | -0.482238913  | -13.163639671 | 4.578178543  |
| C131  | -3.313192116  | -5.268866688  | -3.202231574 |
| C132  | -3.219370580  | -5.845660425  | -1.818237429 |
| C133  | -2.186920322  | -7.041614566  | -1.697454067 |
| C134  | -2.543406774  | -8.145396924  | -2.734134318 |
| C135  | -1.660977533  | -9.393495587  | -2.563165104 |
| C136  | -2.101703395  | -10.573240093 | -3.379942407 |
| C137  | -2.406093970  | -7.660182200  | -0.280599186 |
| C138  | 1.971090326   | -3.497493961  | 1.612217051  |
| Fe139 | 2.664480629   | -5.117901701  | 0.676087393  |
| Fe140 | 1.746598419   | -1.343711474  | 1.458621301  |
| Fe141 | 1.830349485   | -3.236350773  | 3.584243638  |
| Fe142 | 3.902500557   | -3.391234842  | 2.068047033  |
| Fe143 | 3.761284200   | -1.304784280  | 3.705476434  |
| Fe144 | 0.572826589   | -4.870544886  | 2.124368658  |
| Fe145 | 0.751900230   | -3.602581160  | -0.161827033 |
| H146  | -3.898261346  | -1.460581553  | -8.181022111 |
| H147  | -2.293208178  | -1.188540475  | -8.330550807 |
| H148  | -3.251275451  | 2.741891301   | -9.505873909 |
| H149  | -2.613737231  | 0.535025775   | -9.927263232 |
| H150  | -4.331456035  | 0.154218701   | -9.984030008 |
| H151  | -3.205024341  | 3.491477883   | -6.784774342 |
| H152  | -6.096904665  | 2.907079907   | -8.799721105 |
| H153  | -3.647228382  | 4.549530102   | -8.148855957 |
| H154  | -8.337046073  | 2.937328798   | -8.190052596 |
| H155  | -6.410836052  | 1.005563154   | -6.985527462 |
| H156  | -7.973463448  | 4.200546481   | -6.987468125 |
| H157  | -4.072051189  | 1.053138277   | -2.423689193 |
| H158  | -4.803683002  | 1.294146937   | -5.168193701 |
| H159  | -6.678925875  | -0.814698955  | -5.542789270 |
| H160  | -6.150684954  | 5.218226802   | -1.539473351 |
| H161  | -5.926552929  | 3.723541054   | -4.037413190 |
| H162  | -8.147287403  | -0.084535209  | -4.848465119 |
| H163  | -3.495735743  | 2.295491362   | -3.552187006 |
| H164  | -8.536924935  | 3.159310998   | -3.378341357 |
| H165  | -7.045900752  | 5.503900390   | -3.050867897 |
| H166  | -5.456129472  | -1.356867103  | -1.087134615 |
| H167  | -3.677401104  | -1.300045673  | -1.108534479 |
| H168  | -4.511145716  | -2.192532578  | 0.177030544  |
| H169  | -4.601421382  | 0.857262304   | -0.250618314 |
| H170  | -10.732937742 | 2.750397674   | -2.831346947 |
| H171  | -3.698587079  | 3.709966551   | 1.409471233  |
| H172  | -8.150566545  | 3.947585292   | 1.406077511  |
| H173  | -6.612063314  | 6.209112325   | 3.479703374  |
| H174  | -2.415867245  | 0.105495987   | 0.564539804  |
| H175  | -3.150978628  | -0.770265659  | 1.914496568  |
| H176  | -2.898851987  | -2.869076211  | 9.458432414  |
| H177  | -3.389201621  | 5.431982715   | 1.755151249  |
| H178  | -5.063707350  | 6.855228728   | 2.892174681  |
| H179  | -3.355816857  | 4.242554823   | 3.077803504  |
| H180  | -5.096944516  | 5.775005628   | 4.307641467  |
| H181  | -5.834699421  | 5.006251276   | 1.419387668  |
| H182  | -5.518018992  | 3.183587342   | 3.867658953  |
| H183  | -6.008404718  | 2.591091271   | 1.007029908  |
| H184  | -3.253671834  | 1.003384008   | 1.843499488  |
| H185  | 1.689764281   | 2.344304084   | 3.753789900  |
| H186  | 0.650638852   | 3.789119370   | 3.954115284  |
| H187  | 0.771485630   | 2.955650678   | 6.003727045  |
| H188  | -1.657900348  | 3.149676035   | 6.962126664  |
| H189  | 0.689081259   | 0.525422267   | 6.547346298  |
| H190  | 0.053801900   | -1.857262976  | 6.703514083  |
| H191  | -4.000979496  | -0.721356319  | 7.653573719  |
| H192  | -6.959287832  | 0.751222082   | -0.416252330 |

|      |               |               |              |
|------|---------------|---------------|--------------|
| H193 | -9.071670123  | -1.326809599  | -1.236226389 |
| H194 | -10.171900822 | -0.615019186  | -0.035254908 |
| H195 | -8.529184016  | 0.883812024   | -2.015344070 |
| H196 | -10.575985544 | 3.765924830   | -1.379231156 |
| H197 | -3.370277484  | 1.673857222   | 7.461491473  |
| H198 | -5.992474557  | -0.920411999  | 1.799140904  |
| H199 | -9.914785510  | 5.210382233   | 3.151060704  |
| H200 | -10.387856521 | 4.132147690   | 1.813109645  |
| H201 | -9.902034608  | 2.187058124   | 3.700304690  |
| H202 | -6.314483922  | -10.158011004 | 6.574728509  |
| H203 | 0.779088991   | -4.375020945  | -5.474655492 |
| H204 | -4.833712048  | -6.421633236  | -3.487567744 |
| H205 | 4.473221382   | -6.092072507  | -7.868755274 |
| H206 | 5.324772672   | -6.600700256  | -6.388776327 |
| H207 | 4.490413715   | -3.766064535  | -7.218594542 |
| H208 | 9.095135620   | -1.414845527  | -4.528584120 |
| H209 | 6.723622041   | -4.721252720  | -8.003177113 |
| H210 | 0.869110697   | 0.003319884   | -4.565928961 |
| H211 | -1.642299043  | -1.391806453  | -5.628388396 |
| H212 | 6.968809183   | -2.606797118  | -5.052437951 |
| H213 | 8.147390654   | -0.665717868  | -6.897006714 |
| H214 | 7.395664436   | -4.760524561  | -5.131838877 |
| H215 | -0.473576195  | -3.914981935  | -4.327038745 |
| H216 | 4.975401464   | -4.126932541  | -5.559212275 |
| H217 | 7.418827845   | -6.020312403  | -6.186743648 |
| H218 | 0.158952748   | 0.851635393   | -8.016434709 |
| H219 | -0.707397988  | 0.496229151   | -3.944661627 |
| H220 | 4.208340330   | -6.926697416  | -4.618178526 |
| H221 | -1.096488961  | -1.766508420  | -4.001460941 |
| H222 | -2.135982483  | 5.673247735   | -0.322863462 |
| H223 | -2.016745697  | 2.995255912   | -0.913727170 |
| H224 | -3.719246163  | 6.985986035   | -4.588917028 |
| H225 | -1.560781640  | 5.016291661   | -5.177351354 |
| H226 | -0.409005946  | 8.052040902   | -2.229538230 |
| H227 | 0.442074593   | 12.881936238  | -0.263000463 |
| H228 | -2.188099452  | 10.232928688  | -0.628752434 |
| H229 | -0.539572871  | 10.617335284  | -2.780332790 |
| H230 | 0.807975555   | 9.619923598   | -0.191000114 |
| H231 | 3.558118895   | 13.604132028  | -3.036429891 |
| H232 | 0.139517663   | 5.340573410   | 0.531829877  |
| H233 | 0.861309809   | 5.843610189   | -0.996587605 |
| H234 | 2.296048458   | 14.472253783  | -0.994041294 |
| H235 | 0.980639572   | 9.723251058   | -2.770362410 |
| H236 | -0.981009047  | 5.485228229   | -2.914657317 |
| H237 | -3.805611365  | 5.243583010   | -4.302573646 |
| H238 | 0.146932987   | 7.462783220   | -7.011336259 |
| H239 | 1.594054092   | 1.326528359   | -2.280776196 |
| H240 | -0.938105129  | 6.466569584   | -7.999991409 |
| H241 | -0.753341511  | -3.541888345  | 10.228997585 |
| H242 | -0.404771295  | -2.543102261  | 8.981693740  |
| H243 | 4.140802896   | 2.652001201   | 4.196109831  |
| H244 | 2.495156522   | 4.548047476   | 2.741748619  |
| H245 | 4.070664276   | 4.755795133   | 5.917003023  |
| H246 | 2.101160824   | 3.703557899   | -1.482792919 |
| H247 | 4.180543834   | 5.122974221   | -2.705358163 |
| H248 | 4.063118654   | 6.139309633   | -1.500523043 |
| H249 | 3.555172588   | 3.062886951   | -4.775465937 |
| H250 | 3.548008355   | 4.089465708   | -6.239965696 |
| H251 | 7.798091091   | 7.822902762   | 5.667108360  |
| H252 | 8.066737226   | 9.552939352   | 5.307946299  |
| H253 | 7.222298649   | 6.395950851   | 3.927151383  |
| H254 | 6.691034333   | 6.994736805   | 2.369592177  |
| H255 | 9.350439638   | 6.102153402   | 0.753986372  |
| H256 | 7.164759526   | 2.608573504   | -1.220814069 |
| H257 | 4.440918918   | 10.438478406  | -1.071844042 |
| H258 | 2.425446069   | 8.499219025   | 3.043876998  |
| H259 | 6.116046912   | 6.941063989   | -0.362682523 |
| H260 | 5.591281088   | 1.354455023   | 2.469694409  |
| H261 | 6.356923833   | 2.047453529   | 4.708150192  |
| H262 | 5.026761807   | 2.843696370   | 0.499145560  |
| H263 | 0.000876888   | 4.502732138   | -7.062040752 |
| H264 | 8.738808150   | 2.951453961   | 6.647146159  |
| H265 | 1.661148308   | 2.223509116   | -6.351452578 |
| H266 | 7.311364165   | 1.573861499   | 2.136160186  |
| H267 | 3.254553704   | 7.003948931   | 1.264830263  |
| H268 | 3.181023172   | 5.857850020   | -4.561583553 |
| H269 | 7.550811994   | 4.130331106   | 7.242805346  |
| H270 | 9.319496537   | 4.456370767   | 0.209886267  |
| H271 | 7.722003226   | 7.532791891   | -0.139364573 |
| H272 | 0.787128085   | -0.361814689  | -7.046618966 |

|      |               |               |              |
|------|---------------|---------------|--------------|
| H273 | -1.448558836  | 0.938797655   | -6.328070802 |
| H274 | 3.695550794   | 11.937602194  | 0.756733571  |
| H275 | 1.357265337   | 4.034309880   | -4.087946802 |
| H276 | 7.111852149   | 4.029976771   | 2.619039201  |
| H277 | 8.045126206   | 2.938565569   | 0.263112190  |
| H278 | 5.840746147   | 1.328788235   | 0.141318093  |
| H279 | 5.875634995   | 4.734532226   | -0.863220936 |
| H280 | 2.286300199   | 6.925310981   | 6.653908059  |
| H281 | 5.165681714   | 7.290705650   | 5.115630026  |
| H282 | 6.299671983   | 9.234535454   | 6.986769202  |
| H283 | 3.378232889   | 5.999374597   | 7.706932089  |
| H284 | 3.986063994   | 9.524087221   | 4.473415849  |
| H285 | 7.031896794   | -8.173434335  | -1.050373680 |
| H286 | 5.467423752   | -8.923195787  | -1.420388516 |
| H287 | 2.189379782   | -10.051786425 | 1.821690894  |
| H288 | 7.208889110   | -10.348034651 | -2.209110035 |
| H289 | 6.558187143   | -9.662659803  | -3.545841537 |
| H290 | 3.402895336   | -0.345150775  | 6.885702269  |
| H291 | 3.336972134   | 2.155545457   | 8.725396891  |
| H292 | 7.214771718   | 1.219972314   | 7.013345008  |
| H293 | 3.105411673   | 1.340398278   | 6.364122969  |
| H294 | 4.488896680   | 1.553131720   | 9.714165701  |
| H295 | 7.854144676   | -3.128535920  | 3.072916026  |
| H296 | 5.479431640   | 0.295604621   | 7.994956352  |
| H297 | -7.087985302  | -6.084413900  | 2.284308803  |
| H298 | -5.591372609  | -8.750075823  | 2.477192057  |
| H299 | 6.892302460   | -3.619140165  | 0.874560829  |
| H300 | -2.371699775  | -1.454917288  | 4.687312955  |
| H301 | 7.455505197   | -1.570273218  | -1.926189039 |
| H302 | 3.135654372   | -1.447824868  | -3.262645766 |
| H303 | 6.173361469   | -0.997414955  | -0.832094847 |
| H304 | -5.411461379  | -4.025716183  | 2.362791869  |
| H305 | 5.380467028   | -3.347762340  | -0.666406692 |
| H306 | -4.166171733  | -4.940616813  | 1.508815723  |
| H307 | -5.819015420  | -6.691235718  | 1.199941478  |
| H308 | -4.228340679  | -6.714149924  | 3.249184245  |
| H309 | -5.486943679  | -5.832827798  | 4.138562058  |
| H310 | 5.853493391   | 0.060189262   | -7.007709574 |
| H311 | -8.407233515  | -8.146871672  | 1.645570856  |
| H312 | -8.413664142  | -9.991399984  | -0.821117832 |
| H313 | 3.486614808   | 0.311795848   | -1.569090462 |
| H314 | -10.461580423 | -9.603531113  | 1.213420966  |
| H315 | -10.412098779 | -9.074940806  | -0.335049451 |
| H316 | -2.603457028  | -4.531689122  | 3.260177840  |
| H317 | 5.017680286   | 2.232329468   | -2.068632767 |
| H318 | 4.414430608   | -1.404394268  | -5.403209061 |
| H319 | -3.183822767  | -12.020737209 | 0.401322782  |
| H320 | -0.098341048  | -10.952633480 | -0.009861332 |
| H321 | -3.584760070  | -9.681016964  | 0.916717767  |
| H322 | -2.650931533  | -12.442229101 | -0.986282673 |
| H323 | 9.614848496   | -4.739173433  | 1.158482992  |
| H324 | -1.720347750  | -7.525057597  | 2.306067489  |
| H325 | -4.203654070  | -6.192984820  | -1.468891146 |
| H326 | 5.964451995   | -6.131712158  | -1.025036891 |
| H327 | -3.601528323  | -8.423855786  | -2.601677406 |
| H328 | 2.958211819   | -9.501859421  | -3.536615600 |
| H329 | 2.154341645   | -7.199978154  | -2.796500491 |
| H330 | -8.958592566  | -11.176485400 | 0.372649145  |
| H331 | -1.502293453  | -2.772520974  | 3.954532215  |
| H332 | -2.898034261  | -8.886894746  | 3.895310816  |
| H333 | -1.148994298  | -6.911473729  | 3.616286158  |
| H334 | -5.166697920  | -9.154056919  | 4.576868326  |
| H335 | -5.584978227  | -2.659222476  | 3.850141652  |
| H336 | -2.417726630  | -11.140266396 | -5.157082659 |
| H337 | -0.628725770  | -9.132806343  | -2.841514074 |
| H338 | -1.654503163  | -9.721118065  | -1.517511528 |
| H339 | -2.408836968  | -7.737826271  | -3.746854538 |
| H340 | 4.325838887   | -4.733150648  | -2.123602147 |
| H341 | 6.392223069   | 2.211917959   | -4.143986074 |
| H342 | 6.911584090   | 1.281025648   | -6.272118537 |
| H343 | -2.849433525  | -5.061966801  | -1.144180201 |
| H344 | -3.581234377  | -10.046843118 | 3.117449991  |
| H345 | -4.788581819  | -10.592225560 | 1.299622636  |
| H346 | -4.766026899  | -1.137660055  | 3.956045776  |
| H347 | 2.255981293   | -11.338577476 | -1.888924683 |
| H348 | -0.021366400  | -9.393035841  | 0.820933328  |
| H349 | 5.122895703   | -5.100534084  | -3.679217149 |
| H350 | 9.135336841   | -2.208164800  | 2.240716404  |
| H351 | -3.440724925  | -3.071160791  | 7.062683281  |
| H352 | -1.760625478  | -3.541714197  | 6.689213669  |

|       |               |               |              |
|-------|---------------|---------------|--------------|
| H353  | 2.872692485   | -12.295202085 | 1.690089225  |
| H354  | 1.615942206   | -12.727496307 | 0.735160147  |
| H355  | -2.139614598  | -12.899985026 | 3.282527150  |
| H356  | -0.939278143  | -11.944359037 | 1.576378681  |
| H357  | 0.365755397   | -13.701524513 | 4.088381629  |
| H358  | -1.728218655  | -11.445947229 | 4.218541510  |
| H359  | -1.974241575  | -5.643630621  | 8.469726560  |
| H360  | 3.127225504   | 12.217823196  | 6.108262709  |
| H361  | -7.492541296  | -8.820499166  | 6.462317542  |
| H362  | -5.257129960  | -7.281481282  | 6.883236713  |
| H363  | 4.638033358   | 12.095655183  | 3.456391925  |
| H364  | 1.871407090   | 10.787755306  | 3.814245996  |
| H365  | 2.226229817   | 12.197369270  | 2.797299862  |
| H366  | -0.258811749  | -3.198113276  | -1.222453310 |
| H367  | 4.620306672   | 8.282675936   | -1.774026906 |
| H368  | 0.095640589   | -1.243485739  | 1.817026244  |
| H369  | 0.092160934   | -1.755615117  | 1.171983761  |
| H370  | 0.711242836   | -0.916848883  | -1.244862782 |
| Mo371 | 0.307177135   | -6.263994809  | -0.169992249 |
| N372  | -3.176561824  | -1.169474441  | -8.845587424 |
| N373  | -3.666744212  | 2.519868333   | -8.604083215 |
| N374  | -6.305603251  | 3.251980177   | -7.866256900 |
| N375  | -7.148916694  | 1.074430630   | -6.285586577 |
| N376  | -5.175244796  | 1.262032757   | -4.215848305 |
| N377  | -5.950644269  | 3.735617431   | -3.015105749 |
| N378  | -8.794397242  | 3.368391036   | -2.410030285 |
| N379  | -9.216822144  | 0.763203112   | -1.265514318 |
| N380  | -7.040174105  | 0.180580045   | 0.424003357  |
| N381  | -5.952924081  | 2.382908813   | 2.005108255  |
| N382  | -8.412899853  | 3.899306955   | 2.393341200  |
| N383  | -9.845372592  | -9.201557132  | 0.504141075  |
| N384  | -7.518930022  | -8.651394822  | 1.734640571  |
| N385  | -3.528671598  | -4.088031036  | 3.293629981  |
| N386  | -4.704854465  | -2.163008131  | 3.938184795  |
| N387  | -2.375694105  | -2.206876355  | 4.000488344  |
| N388  | -6.101333015  | -8.849277987  | 4.927266202  |
| N389  | 0.555802021   | 0.647421935   | -7.096561929 |
| N390  | 0.175926071   | -3.654421132  | -5.069975058 |
| N391  | 1.094785907   | 2.893124146   | -5.807514507 |
| N392  | 0.251278043   | 5.401808116   | -6.657569936 |
| N393  | -2.012564447  | 5.939069311   | -5.137775089 |
| N394  | -1.583620902  | 6.044473136   | -2.314194150 |
| N395  | 1.164045208   | 3.301820094   | -1.539875904 |
| N396  | -0.431838084  | 1.758662409   | -1.696247866 |
| N397  | -0.515620498  | 8.364244298   | -1.266656348 |
| N398  | 2.210402094   | 11.925510305  | -2.918312593 |
| N399  | 2.081997484   | 13.599791426  | -1.469284125 |
| N400  | -0.821715818  | -3.449206985  | 9.212728545  |
| N401  | 3.900797798   | 1.319010152   | 8.909247025  |
| N402  | 6.850383992   | 2.168766468   | 7.038349312  |
| N403  | 6.768691450   | 2.920617916   | 4.330474477  |
| N404  | 6.779213307   | 4.488591782   | -0.407320120 |
| N405  | 8.815631137   | 5.313357316   | 0.406318211  |
| N406  | 7.066043767   | 6.764137539   | -0.027715340 |
| N407  | 4.032937763   | 3.582846720   | 3.763996990  |
| N408  | 3.566257229   | 5.610656711   | 5.659948796  |
| N409  | 5.083127121   | 8.000759542   | 5.845261423  |
| N410  | 6.973529501   | 7.193348797   | 3.328515806  |
| N411  | 4.380291089   | 10.428634682  | 4.720102315  |
| N412  | 7.124771159   | -9.464035024  | -2.716152199 |
| N413  | 5.877122139   | -6.138349354  | -2.050247303 |
| N414  | 6.076229365   | -3.011228567  | -1.355103114 |
| N415  | 7.704249771   | -2.992641905  | 0.966798143  |
| N416  | 7.555234783   | -5.009692177  | -6.115160079 |
| N417  | 7.087315068   | -2.134332948  | -5.957235904 |
| N418  | 2.251627066   | -11.952516158 | 0.951341712  |
| N419  | 1.326178453   | -8.248897565  | -1.109753118 |
| N420  | 2.434662470   | -9.333874969  | -2.682510023 |
| N421  | -0.527916987  | -11.848599390 | 2.503858407  |
| N422  | 1.726854051   | 1.597716198   | 1.168142729  |
| N423  | 1.711444178   | 0.476041305   | 1.284729117  |
| O424  | -4.181826856  | 0.889798429   | -7.100345954 |
| O425  | -5.481886145  | 4.141381599   | -5.938695453 |
| O426  | -8.672675817  | 2.462821187   | -5.293081170 |
| O427  | -6.775409675  | 0.457087780   | -2.810687956 |
| O428  | -5.092311353  | 2.917922018   | -1.069278360 |
| O429  | -8.327024659  | 4.529963059   | -0.500233749 |
| O430  | -11.086852960 | 1.594102879   | -0.224354056 |
| O431  | -8.236517815  | -1.507548458  | 1.417645076  |
| O432  | -5.581903832  | 0.745821607   | 3.567511445  |

|  |                 |               |                                       |              |
|--|-----------------|---------------|---------------------------------------|--------------|
|  | O433            | -7.813200818  | 3.817021588                           | 4.580375904  |
|  | O434            | -11.334817794 | 3.445256015                           | 4.426577780  |
|  | O435            | -6.534656278  | -10.635232978                         | 1.068025260  |
|  | O436            | -8.104033551  | -7.844047984                          | 4.407443508  |
|  | O437            | -5.394191700  | -8.597624598                          | 8.435062915  |
|  | O438            | -1.026925295  | 3.093379487                           | -4.947841203 |
|  | O439            | 1.017617354   | -2.098707187                          | -6.497341158 |
|  | O440            | 1.553920070   | 6.454317901                           | -5.103736245 |
|  | O441            | 3.772525079   | 5.075729647                           | -4.409729406 |
|  | O442            | -2.227636037  | 8.010569897                           | -6.113588992 |
|  | O443            | -3.712980895  | 6.811230406                           | -2.017134550 |
|  | O444            | -1.292858296  | 7.824393808                           | 0.808675945  |
|  | O445            | -1.030968289  | 11.224088466                          | 0.728779801  |
|  | O446            | -3.854900580  | -5.230397599                          | 9.150576410  |
|  | O447            | -0.885974452  | 2.558274656                           | 6.892834553  |
|  | O448            | 4.998936411   | 3.473368196                           | 7.282724719  |
|  | O449            | 7.864154023   | 4.881448363                           | 4.826925191  |
|  | O450            | 4.886085713   | 5.091550144                           | 2.272531336  |
|  | O451            | 1.857160517   | 6.412159011                           | 4.354678188  |
|  | O452            | 1.668623781   | 3.178977136                           | 5.680596453  |
|  | O453            | 4.128956932   | 8.495475179                           | 7.866951779  |
|  | O454            | 6.123458420   | 11.496712559                          | 5.727593367  |
|  | O455            | 6.993563360   | 9.439389482                           | 2.909675985  |
|  | O456            | 3.369276486   | 13.846845225                          | 4.900956066  |
|  | O457            | 4.356544274   | 7.757238758                           | -0.994249320 |
|  | O458            | 5.609860958   | -7.470283722                          | -3.906971819 |
|  | O459            | 7.069462259   | -3.455974557                          | -3.374832401 |
|  | O460            | 8.646462578   | -1.007374009                          | 0.306747529  |
|  | O461            | 9.899650862   | -4.795111086                          | 3.178327295  |
|  | O462            | 7.184281042   | -2.312738514                          | -8.230733554 |
|  | O463            | 2.186653968   | -5.710941380                          | -6.596720106 |
|  | O464            | 3.272467448   | -6.696460235                          | -4.915914487 |
|  | O465            | 8.791947183   | 0.596827398                           | -4.398634926 |
|  | O466            | 1.110120924   | -11.070464962                         | 3.859054358  |
|  | O467            | -0.761374522  | -13.347541203                         | 5.754902432  |
|  | O468            | -2.574970078  | -4.422287171                          | -3.682759461 |
|  | O469            | -4.325776856  | -5.759586466                          | -3.994462042 |
|  | O470            | -2.424023352  | -11.673091308                         | -2.934105162 |
|  | O471            | -2.114181357  | -10.318576780                         | -4.715640087 |
|  | O472            | -1.390108863  | -7.595245811                          | 0.511924748  |
|  | O473            | -3.495436564  | -8.215861133                          | 0.005216479  |
|  | O474            | -0.894569300  | -6.595533652                          | -1.865268411 |
|  | O475            | -3.519660899  | -9.647155837                          | 4.024976868  |
|  | O476            | -1.901777557  | -7.437523970                          | 3.276536512  |
|  | O477            | 4.351919741   | 5.234119577                           | -1.736376413 |
|  | O478            | -2.791589749  | -12.791752385                         | -0.081902974 |
|  | O479            | -3.799914650  | -10.542581913                         | 1.379113197  |
|  | S480            | 4.841620412   | 0.290027646                           | 5.021816118  |
|  | S481            | 4.156889934   | -1.232587910                          | 1.484347818  |
|  | S482            | 1.864795907   | -5.003126457                          | -1.428803206 |
|  | S483            | 1.450910005   | -0.996843687                          | 3.847801296  |
|  | S484            | 1.751569841   | -1.694826726                          | -0.827928876 |
|  | S485            | 4.885403043   | -5.052292548                          | 0.934227555  |
|  | S486            | -1.086360949  | -4.491542559                          | 0.684438687  |
|  | S487            | 4.014881417   | -3.505826077                          | 4.293047762  |
|  | S488            | 1.610878111   | -6.806111720                          | 1.749256148  |
|  | S489            | 0.063016025   | -4.477094558                          | 4.239283583  |
|  | <b>12 (S=1)</b> |               | <b>bm16x2h2n2n2xhdthconexth.car_3</b> |              |
|  | Fe(139)         | 2.170         | C1                                    | -1.697234102 |
|  | Fe(140)         | -0.036        | C2                                    | -2.214067600 |
|  | Fe(141)         | 2.775         | C3                                    | -2.493819961 |
|  | Fe(142)         | -2.412        | C4                                    | -3.956226522 |
|  | Fe(143)         | 1.377         | C5                                    | -6.273141544 |
|  | Fe(144)         | -2.364        | C6                                    | -6.579899088 |
|  | Fe(145)         | 0.198         | C7                                    | -5.873575600 |
|  |                 |               | C8                                    | -5.360941592 |
|  |                 |               | C9                                    | -3.633891697 |
|  |                 |               | C10                                   | -4.529845851 |
|  |                 |               | C11                                   | -6.018188700 |
|  |                 |               | C12                                   | -7.395227589 |
|  |                 |               | C13                                   | -9.427497999 |
|  |                 |               | C14                                   | -9.644185957 |
|  |                 |               | C15                                   | -8.796617266 |
|  |                 |               | C16                                   | -7.903714070 |
|  |                 |               | C17                                   | -5.957730937 |
|  |                 |               | C18                                   | -6.186864167 |
|  |                 |               | C19                                   | -4.494332006 |
|  |                 |               | C20                                   | -3.491977839 |
|  |                 |               | C21                                   | -4.300378351 |
|  |                 |               |                                       | -5.686571524 |
|  |                 |               |                                       | -4.245920031 |
|  |                 |               |                                       | -2.119595190 |
|  |                 |               |                                       | -1.831915509 |
|  |                 |               |                                       | -2.594361883 |
|  |                 |               |                                       | -2.648768504 |
|  |                 |               |                                       | -3.493746661 |
|  |                 |               |                                       | -2.220774088 |
|  |                 |               |                                       | -0.506137988 |
|  |                 |               |                                       | 0.718447116  |
|  |                 |               |                                       | 1.912244985  |
|  |                 |               |                                       | 1.834219659  |
|  |                 |               |                                       | 0.516363508  |
|  |                 |               |                                       | 0.144186151  |
|  |                 |               |                                       | -1.110575920 |
|  |                 |               |                                       | -0.458374920 |
|  |                 |               |                                       | 1.009974813  |
|  |                 |               |                                       | 2.529924218  |
|  |                 |               |                                       | 0.601082162  |
|  |                 |               |                                       | 1.386400013  |
|  |                 |               |                                       | -0.907545112 |
|  |                 |               |                                       | -7.714088875 |
|  |                 |               |                                       | -7.648210245 |
|  |                 |               |                                       | -8.855834827 |
|  |                 |               |                                       | -8.526061963 |
|  |                 |               |                                       | -8.587243829 |
|  |                 |               |                                       | -7.086916890 |
|  |                 |               |                                       | -4.896352501 |
|  |                 |               |                                       | -4.217379771 |
|  |                 |               |                                       | -4.098842001 |
|  |                 |               |                                       | -4.338552393 |
|  |                 |               |                                       | -5.847480773 |
|  |                 |               |                                       | -5.171440257 |
|  |                 |               |                                       | -4.816736073 |
|  |                 |               |                                       | -3.345417078 |
|  |                 |               |                                       | -1.407192265 |
|  |                 |               |                                       | -0.349158097 |
|  |                 |               |                                       | 0.062071700  |
|  |                 |               |                                       | 0.086633719  |
|  |                 |               |                                       | -0.255071403 |
|  |                 |               |                                       | 0.599804593  |
|  |                 |               |                                       | -0.064909369 |

|      |               |              |              |
|------|---------------|--------------|--------------|
| C22  | -6.152268979  | 4.655858867  | -1.137193892 |
| C23  | -7.653025352  | 5.002839022  | -1.194444572 |
| C24  | -5.341510607  | 5.291338875  | -2.291698796 |
| C25  | -5.642221705  | 6.790489289  | -2.410542116 |
| C26  | -3.837149564  | 5.064820522  | -2.088321373 |
| C27  | -9.821561931  | 4.601902241  | -2.212108171 |
| C28  | -10.557022885 | 4.535594571  | -0.888562796 |
| C29  | -9.355403624  | -8.328312765 | 4.745162611  |
| C30  | -8.234015262  | -7.578383885 | 5.466003961  |
| C31  | -7.446129076  | -5.273522126 | 6.036043214  |
| C32  | -8.196024683  | -4.534728313 | 7.159234416  |
| C33  | -6.919848976  | -4.307820122 | 4.957641334  |
| C34  | -5.933501763  | -3.255567491 | 5.472826892  |
| C35  | -5.226589532  | -2.580355377 | 4.296787952  |
| C36  | -4.265070585  | -0.276790285 | 4.298182409  |
| C37  | -8.115378585  | -3.794009373 | 9.491797132  |
| C38  | -7.634658995  | -2.375776422 | 9.726333542  |
| C39  | 0.764965727   | -2.788132247 | -5.104621066 |
| C40  | 1.108188680   | -1.328840128 | -5.455502645 |
| C41  | 0.606078675   | -2.903833871 | -3.574069002 |
| C42  | -0.091238766  | -4.182259642 | -3.053207808 |
| C43  | 0.828620113   | -5.374259035 | -2.802770225 |
| C44  | 3.004610894   | 0.214196940  | -5.859945642 |
| C45  | 2.479418778   | 1.002854535  | -7.062704794 |
| C46  | 4.547619638   | 0.067322022  | -5.877533473 |
| C47  | 1.427883723   | 0.886375869  | -9.272961155 |
| C48  | 0.029575838   | 1.465274412  | -9.014085694 |
| C49  | -1.840534200  | 1.665545080  | -7.435455067 |
| C50  | -1.732610545  | 2.758963123  | -6.365806289 |
| C51  | -0.455241135  | 3.804947548  | -4.556528887 |
| C52  | -0.330583957  | 5.189435884  | -5.224467971 |
| C53  | 0.836911150   | 3.611597856  | -3.741660174 |
| C54  | 1.032609636   | 2.297376672  | -3.055580096 |
| C55  | 0.129576562   | 1.432619614  | -2.473682523 |
| C56  | 2.183668567   | 0.668748998  | -2.195799427 |
| C57  | 0.808227414   | 6.414346577  | -7.041216324 |
| C58  | -0.438449204  | 6.952099882  | -7.744373762 |
| C59  | 1.907454789   | 6.081842895  | -8.066172022 |
| C60  | 2.596746605   | 7.251256411  | -8.703289641 |
| C61  | 2.270927697   | 8.592855799  | -8.712538548 |
| C62  | 4.160752538   | 8.247949747  | -9.816102005 |
| C63  | -4.097529578  | 3.373021935  | 8.011798351  |
| C64  | -4.629986127  | 2.354354317  | 9.001105661  |
| C65  | -3.889942250  | 2.629517413  | 6.667096187  |
| C66  | -3.405219993  | 3.548609050  | 5.571020016  |
| C67  | -4.304867275  | 4.303723594  | 4.795016130  |
| C68  | -2.029056860  | 3.705677874  | 5.321864606  |
| C69  | -3.849234899  | 5.196387670  | 3.820306236  |
| C70  | -1.558942504  | 4.597570054  | 4.357691300  |
| C71  | -2.471760874  | 5.349975765  | 3.611737957  |
| C72  | 3.924708307   | 5.990592647  | 5.738303701  |
| C73  | 4.721757662   | 6.688018013  | 4.627361318  |
| C74  | 2.999613582   | 4.921085195  | 5.142212115  |
| C75  | 6.945381269   | 7.003223588  | 3.615673940  |
| C76  | 6.875478695   | 6.377869251  | 2.221369878  |
| C77  | 5.984622333   | 4.545144033  | 0.829280335  |
| C78  | 4.655731726   | 5.015687717  | 0.195311324  |
| C79  | 6.067865927   | 3.017662184  | 1.009058667  |
| C80  | 5.997844766   | 2.165962122  | -0.262344401 |
| C81  | 7.187734092   | 2.287990352  | -1.227297527 |
| C82  | 7.868248761   | 4.205417144  | -2.657688276 |
| C83  | 2.292093531   | 5.542458626  | 0.510258553  |
| C84  | 2.155009836   | 7.040584383  | 0.205930524  |
| C85  | 1.147357765   | 5.153609366  | 1.472949666  |
| C86  | 2.477160549   | 9.265173789  | 1.163237936  |
| C87  | 3.421338489   | 10.341642712 | 0.649428248  |
| C88  | 5.498361183   | 10.886630002 | -0.529124099 |
| C89  | 5.083230527   | 11.640190630 | -1.810411101 |
| C90  | 6.888273616   | 10.238389677 | -0.681787838 |
| C91  | 6.955228149   | 9.211041209  | -1.810299948 |
| C92  | 3.760130914   | 11.550769786 | -3.873122476 |
| C93  | 3.179520668   | 12.955167024 | -3.797947182 |
| C94  | 2.728102945   | 10.594316992 | -4.529444212 |
| C95  | 3.271698137   | 9.192510636  | -4.670132557 |
| C96  | 4.186382202   | 8.887965677  | -5.690492270 |
| C97  | 2.918548797   | 8.178591693  | -3.763277111 |
| C98  | 4.726544080   | 7.609009536  | -5.814106795 |
| C99  | 3.465978653   | 6.895785061  | -3.863738978 |
| C100 | 4.361254367   | 6.623905512  | -4.895138827 |
| C101 | 6.320970207   | -7.000283894 | 5.166176016  |

|       |              |               |              |
|-------|--------------|---------------|--------------|
| C102  | 6.320501847  | -6.644895403  | 3.683248873  |
| C103  | 5.593973214  | -4.945110708  | 2.036345557  |
| C104  | 6.511347926  | -3.802916636  | 1.584953074  |
| C105  | 7.080178961  | -1.442601638  | 1.923373859  |
| C106  | 7.634935358  | -0.587554663  | 3.058233839  |
| C107  | 7.452110128  | 0.185278193   | 5.372963611  |
| C108  | 8.184641595  | -0.481519962  | 6.515632213  |
| C109  | 7.248629912  | -7.110695875  | -1.452778833 |
| C110  | 7.464396211  | -6.109310604  | -2.594830224 |
| C111  | 5.723186974  | -7.272497906  | -1.227322167 |
| C112  | 5.399379030  | -8.381504946  | -0.230168409 |
| C113  | 3.918577317  | -8.588209263  | -0.000792993 |
| C114  | 7.523946290  | -3.752205698  | -3.264672759 |
| C115  | 8.502107270  | -2.673845396  | -2.841881370 |
| C116  | 6.151719962  | -3.223654243  | -3.746990690 |
| C117  | 5.242218580  | -2.907294635  | -2.589875901 |
| C118  | 5.364449260  | -1.701568064  | -1.878428780 |
| C119  | 4.336148647  | -3.873823033  | -2.123788332 |
| C120  | 4.635800643  | -1.498365356  | -0.702153246 |
| C121  | 3.614503535  | -3.672124108  | -0.943229986 |
| C122  | 3.780297503  | -2.490359886  | -0.215223867 |
| C123  | 0.423715183  | -7.071610652  | 8.282288980  |
| C124  | -0.796500776 | -6.611444870  | 9.106991253  |
| C125  | -0.101414923 | -7.544731483  | 6.906469003  |
| C126  | 0.933670646  | -7.749319886  | 5.843712394  |
| C127  | 1.845195411  | -8.779681288  | 5.737020382  |
| C128  | 2.018316274  | -7.457205534  | 3.969726478  |
| C129  | -2.764172897 | -7.373420810  | 10.403499446 |
| C130  | -2.628901300 | -7.202416546  | 11.900940140 |
| C131  | -2.915131800 | -6.251282038  | 0.350724774  |
| C132  | -3.146766268 | -5.886542144  | 1.788360269  |
| C133  | -2.220041536 | -6.671631016  | 2.804486456  |
| C134  | -2.409372651 | -8.201636900  | 2.611505179  |
| C135  | -1.634302919 | -9.011371752  | 3.663712028  |
| C136  | -1.870223925 | -10.488807045 | 3.553071189  |
| C137  | -2.758042347 | -6.313177130  | 4.224192970  |
| C138  | 1.280309779  | -1.525588247  | 3.953303826  |
| Fe139 | 2.101621739  | -3.285240168  | 4.297977971  |
| Fe140 | 0.978204938  | 0.047931869   | 2.448827416  |
| Fe141 | 0.934621489  | -0.083553332  | 5.270546490  |
| Fe142 | 3.127211100  | -0.986705649  | 4.368025454  |
| Fe143 | 3.053918667  | 1.595933980   | 4.343435665  |
| Fe144 | -0.184500370 | -2.375017250  | 4.975421354  |
| Fe145 | 0.438781341  | -2.792005851  | 2.344991984  |
| H146  | -2.177158919 | -6.168434727  | -5.791272256 |
| H147  | -0.580938769 | -5.879134772  | -6.007971446 |
| H148  | -1.604141329 | -3.920264774  | -9.582310955 |
| H149  | -0.808168246 | -5.727977537  | -8.361962529 |
| H150  | -2.479776465 | -6.271442524  | -8.230050193 |
| H151  | -1.891940841 | -1.525001544  | -8.154624952 |
| H152  | -4.545149550 | -3.603909655  | -9.383000461 |
| H153  | -2.288942532 | -1.752369354  | -9.870618452 |
| H154  | -6.844412534 | -3.386243098  | -9.089439417 |
| H155  | -4.925236265 | -3.822259714  | -6.772712214 |
| H156  | -6.634605465 | -1.623576604  | -8.950941758 |
| H157  | -3.510667633 | -0.592673389  | -3.011551003 |
| H158  | -3.628601924 | -2.261879407  | -5.347939540 |
| H159  | -5.292276303 | -4.353761725  | -4.537081940 |
| H160  | -5.551432059 | 2.850852427   | -5.522759805 |
| H161  | -4.938506608 | 0.100430833   | -6.270972261 |
| H162  | -6.919615443 | -3.625023728  | -4.593764272 |
| H163  | -2.642262998 | -0.331575647  | -4.541977138 |
| H164  | -7.642005516 | -0.130667753  | -5.792156435 |
| H165  | -6.165455524 | 1.952198233   | -6.935755329 |
| H166  | -4.987411792 | -1.491258382  | -0.693313597 |
| H167  | -3.270533995 | -1.194092598  | -0.326052940 |
| H168  | -4.462786466 | -1.191652586  | 0.987212856  |
| H169  | -4.307849360 | 0.849823861   | -1.313232787 |
| H170  | -9.917752938 | -0.255558368  | -5.428112427 |
| H171  | -3.570378962 | 3.998164080   | -2.075178441 |
| H172  | -7.989484052 | 3.658222341   | -2.750880834 |
| H173  | -6.701315219 | 6.987640958   | -2.628827910 |
| H174  | -2.465247764 | 1.106443724   | 0.320831446  |
| H175  | -3.610790498 | 1.146494501   | 1.666344952  |
| H176  | -4.889516404 | 4.130742834   | 7.855166911  |
| H177  | -3.271049916 | 5.541332863   | -2.902130574 |
| H178  | -5.040158821 | 7.229258526   | -3.219507455 |
| H179  | -3.505701674 | 5.513932845   | -1.137087686 |
| H180  | -5.385214718 | 7.312774764   | -1.475267097 |
| H181  | -5.648180033 | 4.800839574   | -3.233665357 |



|      |               |              |               |
|------|---------------|--------------|---------------|
| H182 | -5.809467410  | 5.089561234  | -0.185360279  |
| H183 | -5.559225248  | 2.721480749  | -1.883980530  |
| H184 | -3.586915807  | 2.475467303  | 0.478097590   |
| H185 | 1.389567620   | 4.184620571  | 1.933706315   |
| H186 | 0.234701561   | 5.032725214  | 0.873615670   |
| H187 | -0.007478176  | 6.340577612  | 2.509154394   |
| H188 | -2.690031759  | 6.673808654  | 2.206001049   |
| H189 | -0.489269602  | 4.688316052  | 4.164892126   |
| H190 | -1.303179945  | 3.097816995  | 5.867884084   |
| H191 | -5.381277872  | 4.198772538  | 4.953323414   |
| H192 | -6.799966309  | 0.434135213  | -1.822308610  |
| H193 | -8.577506071  | -2.189583404 | -1.391283382  |
| H194 | -9.836080165  | -0.970263645 | -1.084006623  |
| H195 | -7.870243236  | -0.937030523 | -3.312569238  |
| H196 | -9.954260240  | 1.465442623  | -4.975500833  |
| H197 | -4.562326508  | 5.759791320  | 3.212055469   |
| H198 | -6.208514320  | 0.672462432  | 1.076088862   |
| H199 | -10.000358672 | 5.588478803  | -2.670962555  |
| H200 | -10.269574458 | 3.838974254  | -2.868829582  |
| H201 | -10.092219203 | 3.871911452  | -0.122334841  |
| H202 | -7.932789990  | -4.392981145 | 10.396673274  |
| H203 | 1.290947885   | -6.782374461 | -1.389985603  |
| H204 | -4.345482566  | -7.536731166 | 0.523178049   |
| H205 | 5.816247961   | -9.345726174 | -0.573697710  |
| H206 | 5.864546864   | -8.180793291 | 0.751178132   |
| H207 | 5.243233959   | -7.495410130 | -2.193100462  |
| H208 | 9.319743494   | -3.032646323 | -2.173266099  |
| H209 | 7.623186340   | -8.064834796 | -1.856995508  |
| H210 | 1.595854066   | -2.794015510 | -3.102884772  |
| H211 | -0.864012910  | -4.507425737 | -3.771242737  |
| H212 | 7.278994446   | -4.510565465 | -1.279914051  |
| H213 | 8.017107171   | -4.233770016 | -4.135118436  |
| H214 | 7.770810293   | -5.898399740 | 0.152080178   |
| H215 | -0.046614450  | -5.729943842 | -0.951816425  |
| H216 | 5.292843184   | -6.321503275 | -0.879386837  |
| H217 | 7.956896292   | -7.495291124 | 0.435058221   |
| H218 | 1.605036916   | -3.975155874 | -6.572287116  |
| H219 | 0.001273336   | -2.046258274 | -3.247360054  |
| H220 | 4.434228910   | -9.824034021 | 1.383990182   |
| H221 | -0.622042216  | -3.933433570 | -2.124036574  |
| H222 | -1.335759370  | 3.855620493  | -3.898939816  |
| H223 | -0.950574672  | 1.467582769  | -2.382010158  |
| H224 | -2.312976087  | 2.135262277  | -8.307032670  |
| H225 | -0.095323272  | 0.463282372  | -7.205269272  |
| H226 | 0.801892987   | 4.297904063  | -6.693428192  |
| H227 | 1.441909868   | 9.147810626  | -8.288019023  |
| H228 | -1.055781782  | 6.157597612  | -8.230831134  |
| H229 | 1.484785015   | 5.423985179  | -8.846651995  |
| H230 | 1.157932255   | 7.168156727  | -6.318879465  |
| H231 | 5.050340061   | 8.471346656  | -10.398878336 |
| H232 | 0.864076006   | 4.430960615  | -3.004387697  |
| H233 | 1.695833959   | 3.765418323  | -4.411246308  |
| H234 | 3.350086291   | 10.207078511 | -9.613722422  |
| H235 | 2.667831261   | 5.477849274  | -7.545085064  |
| H236 | -0.017352322  | 1.939104715  | -5.530006109  |
| H237 | -2.527473269  | 0.884751113  | -7.078207722  |
| H238 | 2.040034520   | 1.720913586  | -9.642975041  |
| H239 | 2.986927206   | 0.015550654  | -1.865984631  |
| H240 | 1.348732476   | 0.147537390  | -10.081731801 |
| H241 | 0.560251660   | -0.338270810 | -1.303629076  |
| H242 | -3.014034175  | 4.594291390  | 9.250627580   |
| H243 | -2.362565337  | 4.429113785  | 7.761081410   |
| H244 | 3.647119789   | 4.766350414  | 1.998051087   |
| H245 | 2.137100578   | 5.013728427  | -0.440872253  |
| H246 | 3.358628300   | 7.457394404  | 1.804665878   |
| H247 | 3.817497101   | 2.571167146  | -3.476155800  |
| H248 | 5.002737883   | 1.873479001  | -5.234133235  |
| H249 | 4.422202447   | 3.827405627  | -4.264762962  |
| H250 | 4.827004585   | -0.465261894 | -4.948455882  |
| H251 | 4.845197004   | -0.566278108 | -6.729203686  |
| H252 | 7.177673749   | 9.800600112  | 0.285372762   |
| H253 | 7.597307819   | 11.042982134 | -0.923458335  |
| H254 | 7.085007484   | 7.612840824  | -0.442843511  |
| H255 | 6.999877546   | 7.190998126  | -2.141813897  |
| H256 | 9.786352669   | 4.907093450  | -2.526497777  |
| H257 | 7.363179740   | 1.325529343  | -1.732245882  |
| H258 | 5.424881085   | 7.375493880  | -6.620742302  |
| H259 | 2.196918836   | 8.375874359  | -2.964876526  |
| H260 | 6.540710702   | 5.205595957  | -3.862868957  |
| H261 | 5.260293970   | 2.688233542  | 1.681888866   |

|      |               |               |              |
|------|---------------|---------------|--------------|
| H262 | 5.745741213   | 4.813952079   | 2.937011916  |
| H263 | 5.055408789   | 2.338528129   | -0.805271985 |
| H264 | 2.109946618   | -0.750429097  | -8.064276639 |
| H265 | 7.981632456   | 6.922432923   | 3.969443377  |
| H266 | 2.983437647   | -1.971860197  | -5.675990461 |
| H267 | 7.016493303   | 2.804571053   | 1.529019981  |
| H268 | 3.216810738   | 6.127978756   | -3.131808475 |
| H269 | 5.255393498   | 5.200602401   | -5.878495825 |
| H270 | 6.716482395   | 8.069774305   | 3.483747092  |
| H271 | 9.549683618   | 3.336231151   | -1.847886656 |
| H272 | 8.195078070   | 5.616144265   | -4.087914666 |
| H273 | 1.843924736   | -4.539262977  | -5.015653888 |
| H274 | -0.231258521  | -2.963658804  | -5.554992664 |
| H275 | 4.480608952   | 9.659618328   | -6.405634542 |
| H276 | 2.724590293   | 0.818605837   | -4.983410756 |
| H277 | 6.766481731   | 4.890193926   | 0.141498061  |
| H278 | 8.095867838   | 2.526870663   | -0.657929466 |
| H279 | 5.968225886   | 1.119082442   | 0.068540706  |
| H280 | 6.064757073   | 3.271999072   | -2.764714330 |
| H281 | 1.520290127   | 9.407052242   | 0.638768823  |
| H282 | 4.670678735   | 8.918706002   | -0.136890959 |
| H283 | 5.575358253   | 11.668478220  | 0.240390600  |
| H284 | 2.307713985   | 9.473132783   | 2.229516846  |
| H285 | 3.794986536   | 10.130931104  | -2.279840484 |
| H286 | 6.526710127   | -6.101774626  | 5.768501392  |
| H287 | 5.281000885   | -7.305924613  | 5.402489967  |
| H288 | 1.026385946   | -6.163787651  | 8.133154987  |
| H289 | 7.047188225   | -8.568905632  | 6.261859352  |
| H290 | 7.308477573   | -8.688091790  | 4.644092030  |
| H291 | 2.496665083   | 4.397043680   | 5.964229299  |
| H292 | 2.552841376   | 7.494976348   | 5.845552610  |
| H293 | 6.441035733   | 5.772237488   | 5.285776125  |
| H294 | 2.243316497   | 5.407458894   | 4.509351133  |
| H295 | 3.725182499   | 7.614632708   | 6.979443702  |
| H296 | 6.561567458   | 0.706941192   | 5.757952364  |
| H297 | 4.624320288   | 5.504228990   | 6.436415167  |
| H298 | -7.780710854  | -3.817099569  | 4.472049605  |
| H299 | -6.603549164  | -5.835533022  | 6.455043175  |
| H300 | 6.272385715   | -1.324683655  | 4.441607710  |
| H301 | -3.187813831  | 1.453472590   | 4.350420251  |
| H302 | 7.920955049   | -1.725024544  | 1.278583194  |
| H303 | 2.917956940   | -4.433965322  | -0.588605557 |
| H304 | 6.428719546   | -0.770396847  | 1.341667141  |
| H305 | -5.959804495  | -2.133907956  | 3.611632773  |
| H306 | 5.551757703   | -2.601509582  | 2.930353419  |
| H307 | -4.673958799  | -3.334718581  | 3.713320042  |
| H308 | -6.424905283  | -4.931988537  | 4.195900870  |
| H309 | -5.176384386  | -3.722770690  | 6.120259728  |
| H310 | -6.451225224  | -2.493521213  | 6.077378108  |
| H311 | 5.696395693   | -3.992863008  | -4.387456278 |
| H312 | -9.218163021  | -5.905130626  | 4.988362791  |
| H313 | -8.901575883  | -8.732310594  | 3.826593253  |
| H314 | 3.221849021   | -2.325624591  | 0.705108689  |
| H315 | -11.201671048 | -7.494370360  | 5.122834597  |
| H316 | -10.946613148 | -7.828652945  | 3.539736275  |
| H317 | -3.358257351  | -1.897608417  | 5.056884562  |
| H318 | 4.717587791   | -0.562532057  | -0.146088382 |
| H319 | 4.196700589   | -4.797675219  | -2.689446716 |
| H320 | -3.944551981  | -9.468481932  | 6.973075061  |
| H321 | -0.652432109  | -8.489099550  | 7.065274909  |
| H322 | -4.326363324  | -7.275835243  | 6.084541025  |
| H323 | -3.240488993  | -10.571551558 | 6.131587703  |
| H324 | 8.636614272   | -1.475529621  | 6.278394378  |
| H325 | -2.549077530  | -4.658465176  | 6.341316375  |
| H326 | -4.197598722  | -6.051541937  | 2.070740317  |
| H327 | 5.497166952   | -4.799680696  | 4.141025432  |
| H328 | -3.482692624  | -8.440837244  | 2.679886538  |
| H329 | 3.244580544   | -9.171041345  | 4.162971179  |
| H330 | 2.355538832   | -7.068698276  | 3.015199972  |
| H331 | -9.614628310  | -9.195431997  | 5.376930207  |
| H332 | -2.312900588  | 0.038396761   | 4.874245551  |
| H333 | -4.156192711  | -4.921747286  | 8.035158197  |
| H334 | -2.081046323  | -4.233453539  | 7.744124120  |
| H335 | -6.549825850  | -4.805541332  | 8.400417008  |
| H336 | -6.292971711  | -0.129701726  | 3.979087851  |
| H337 | -1.603496371  | -11.976087826 | 2.414681989  |
| H338 | -0.562087057  | -8.800519864  | 3.540118639  |
| H339 | -1.927377852  | -8.716157104  | 4.678806494  |
| H340 | -2.050731311  | -8.474147695  | 1.608403156  |
| H341 | 4.544477450   | -4.614537972  | 1.977676404  |

|       |               |              |              |
|-------|---------------|--------------|--------------|
| H342  | 6.053922888   | -0.933863865 | -2.238290247 |
| H343  | 6.346742543   | -2.336838426 | -4.368848192 |
| H344  | -2.899455764  | -4.824031621 | 1.912993021  |
| H345  | -4.813666767  | -6.326456660 | 8.019642766  |
| H346  | -5.642593806  | -7.910799445 | 6.613545828  |
| H347  | -5.395960026  | 1.272450598  | 3.559097113  |
| H348  | 2.056884327   | -9.619684726 | 6.388999055  |
| H349  | -0.831094716  | -6.813834435 | 6.537633654  |
| H350  | 5.747128298   | -5.788134742 | 1.357475045  |
| H351  | 8.128369292   | 0.944393975  | 4.942702932  |
| H352  | -4.851677777  | 2.171876849  | 6.387318058  |
| H353  | -3.163891174  | 1.818249884  | 6.834019494  |
| H354  | 1.545035809   | -7.820392551 | 9.842274466  |
| H355  | 0.790358027   | -8.993200877 | 8.968480951  |
| H356  | -3.459505462  | -8.200150426 | 10.195040436 |
| H357  | -1.176350352  | -8.560437192 | 9.637450907  |
| H358  | -1.590203933  | -7.014730835 | 12.268286582 |
| H359  | -3.227916152  | -6.455144597 | 9.998290108  |
| H360  | -3.839640543  | 1.749907731  | 9.507687928  |
| H361  | 2.706100529   | 13.222334114 | -2.823555787 |
| H362  | -9.206232079  | -3.744146953 | 9.332472003  |
| H363  | -7.160227650  | -1.882495787 | 8.842247542  |
| H364  | 4.661288982   | 11.596168354 | -4.507280954 |
| H365  | 1.807611748   | 10.587396745 | -3.925472695 |
| H366  | 2.479698918   | 11.015745406 | -5.514809984 |
| H367  | -0.713128360  | 0.326466685  | 2.781465667  |
| H368  | -0.191788145  | -3.579564495 | 1.234679979  |
| H369  | -0.728789189  | -0.233749396 | 2.208982714  |
| Mo370 | -0.060763600  | -4.916046030 | 3.998476455  |
| N371  | -1.398536776  | -6.318153953 | -6.438533142 |
| N372  | -2.124854767  | -3.528167635 | -8.801711460 |
| N373  | -4.864142478  | -2.765852932 | -8.903363720 |
| N374  | -5.775789957  | -3.452874928 | -6.347224670 |
| N375  | -4.169947960  | -1.739789642 | -4.656279441 |
| N376  | -5.145122487  | 0.789568395  | -5.544161312 |
| N377  | -8.050532007  | 0.646955991  | -5.267345665 |
| N378  | -8.669154326  | -0.606826745 | -2.763014162 |
| N379  | -6.919511082  | 0.354219352  | -0.814872757 |
| N380  | -5.942227806  | 3.208911092  | -1.070472124 |
| N381  | -8.410330420  | 4.295421018  | -2.071837749 |
| N382  | -10.494811531 | -7.477077421 | 4.384867093  |
| N383  | -8.356474180  | -6.237957675 | 5.434288623  |
| N384  | -4.259121259  | -1.554089523 | 4.704508209  |
| N385  | -5.385635375  | 0.280983861  | 3.781539754  |
| N386  | -3.128305022  | 0.435822690  | 4.346806383  |
| N387  | -7.518556666  | -4.425526871 | 8.329321553  |
| N388  | 1.804359884   | -3.692621520 | -5.609837444 |
| N389  | 0.684171586   | -5.992845043 | -1.614389743 |
| N390  | 2.415440266   | -1.114045199 | -5.729768114 |
| N391  | 2.070160134   | 0.263326571  | -8.132579503 |
| N392  | -0.591474433  | 1.066629523  | -7.870022731 |
| N393  | -0.634910193  | 2.751740619  | -5.554356133 |
| N394  | 2.316950955   | 1.803621946  | -2.882490500 |
| N395  | 0.878426137   | 0.404394616  | -1.947514707 |
| N396  | 0.450517330   | 5.189221542  | -6.343339280 |
| N397  | 3.778962005   | 7.048323885  | -9.395527634 |
| N398  | 3.279212800   | 9.211019955  | -9.424919689 |
| N399  | -2.831756619  | 3.912476476  | 8.510159592  |
| N400  | 3.109937918   | 6.944965548  | 6.507921239  |
| N401  | 6.062446358   | 6.433032923  | 4.612699887  |
| N402  | 6.237647036   | 5.193858551  | 2.114555344  |
| N403  | 6.973958304   | 3.312583475  | -2.255040803 |
| N404  | 9.140912217   | 4.190975294  | -2.210419644 |
| N405  | 7.486879882   | 5.227286623  | -3.469391046 |
| N406  | 3.598975101   | 5.164339360  | 1.040163928  |
| N407  | 2.896082034   | 7.881576040  | 0.994715829  |
| N408  | 4.501280004   | 9.922970836  | -0.073910513 |
| N409  | 6.991010996   | 7.911862656  | -1.420933821 |
| N410  | 4.102633472   | 11.063466791 | -2.547063556 |
| N411  | 7.322858686   | -8.035788698 | 5.435196966  |
| N412  | 5.863730249   | -5.403369002 | 3.391823142  |
| N413  | 6.353354183   | -2.648579216 | 2.266926251  |
| N414  | 7.098682285   | -0.730420893 | 4.301183402  |
| N415  | 8.074895570   | -6.777833958 | -0.284361596 |
| N416  | 7.453055638   | -4.789711912 | -2.251564211 |
| N417  | 1.278015062   | -8.096317797 | 8.893943489  |
| N418  | 1.058353713   | -6.927588751 | 4.724211171  |
| N419  | 2.519386259   | -8.575576742 | 4.552675293  |
| N420  | -1.500272619  | -7.601275906 | 9.729169231  |
| N421  | 1.100757987   | 2.217869736  | 0.458723257  |

|  |                   |                  |                               |              |
|--|-------------------|------------------|-------------------------------|--------------|
|  | N422              | 1.012914994      | 1.387354011                   | 1.213121341  |
|  | O423              | -2.744549797     | -3.775493731                  | -6.623527593 |
|  | O424              | -4.283214520     | -0.780383644                  | -7.952576709 |
|  | O425              | -7.534888382     | -2.013451639                  | -6.610314363 |
|  | O426              | -6.009898100     | -1.657389573                  | -3.321359162 |
|  | O427              | -4.662364498     | 1.593393140                   | -3.467762092 |
|  | O428              | -7.887775461     | 2.827644148                   | -4.609590676 |
|  | O429              | -10.687380960    | 0.487481183                   | -2.771689487 |
|  | O430              | -8.091978263     | -0.711310135                  | 0.850221084  |
|  | O431              | -6.579307397     | 3.092806671                   | 1.120269239  |
|  | O432              | -8.145837631     | 5.884958110                   | -0.471655911 |
|  | O433              | -11.616673269    | 5.108936684                   | -0.684222173 |
|  | O434              | -7.300024897     | -8.220713176                  | 5.990766187  |
|  | O435              | -9.343565855     | -4.092510186                  | 6.973855824  |
|  | O436              | -7.758560845     | -1.794521328                  | 10.792648781 |
|  | O437              | 0.238665075      | -0.430204585                  | -5.483924932 |
|  | O438              | 1.663247199      | -5.760326192                  | -3.651948865 |
|  | O439              | 2.417637482      | 2.240428016                   | -7.045532964 |
|  | O440              | 5.232364150      | 1.293881370                   | -6.011437654 |
|  | O441              | -0.474780568     | 2.229248204                   | -9.849256642 |
|  | O442              | -2.619505895     | 3.616868363                   | -6.276363019 |
|  | O443              | -0.806909791     | 6.212511214                   | -4.725755280 |
|  | O444              | -0.758612969     | 8.127505046                   | -7.799417893 |
|  | O445              | -5.818178516     | 2.165850344                   | 9.221644880  |
|  | O446              | -1.961812331     | 6.217007157                   | 2.666047314  |
|  | O447              | 4.188296370      | 7.451066709                   | 3.802831006  |
|  | O448              | 7.425503025      | 6.971301775                   | 1.270103631  |
|  | O449              | 4.593241371      | 5.250503220                   | -1.022013944 |
|  | O450              | 1.356998156      | 7.435317666                   | -0.653618804 |
|  | O451              | 0.947788188      | 6.135404590                   | 2.498167312  |
|  | O452              | 3.185241080      | 11.537926429                  | 0.865135616  |
|  | O453              | 5.617333716      | 12.715647919                  | -2.118836498 |
|  | O454              | 6.941524290      | 9.563153398                   | -3.000443871 |
|  | O455              | 3.173801004      | 13.722699852                  | -4.748532345 |
|  | O456              | 4.903462674      | 5.334208005                   | -4.977315321 |
|  | O457              | 6.676617083      | -7.475899974                  | 2.823902173  |
|  | O458              | 7.331425092      | -3.954059535                  | 0.651374357  |
|  | O459              | 8.515161171      | 0.248281482                   | 2.791839089  |
|  | O460              | 8.301248242      | 0.026386653                   | 7.620060715  |
|  | O461              | 7.596033817      | -6.489273676                  | -3.771613571 |
|  | O462              | 3.013767470      | -8.053475681                  | -0.615257800 |
|  | O463              | 3.607763832      | -9.469203462                  | 1.001465277  |
|  | O464              | 8.462167931      | -1.512773437                  | -3.223107588 |
|  | O465              | -1.136696649     | -5.418359232                  | 9.165913470  |
|  | O466              | -3.576852211     | -7.247866709                  | 12.670384405 |
|  | O467              | -2.078178489     | -5.757860122                  | -0.389844984 |
|  | O468              | -3.718690336     | -7.240287846                  | -0.163941932 |
|  | O469              | -2.438835620     | -11.187058845                 | 4.391374554  |
|  | O470              | -1.386788880     | -11.019386188                 | 2.399860810  |
|  | O471              | -1.914507384     | -5.715702446                  | 4.998353398  |
|  | O472              | -3.923223284     | -6.637772047                  | 4.556428980  |
|  | O473              | -0.899034601     | -6.311512650                  | 2.654377276  |
|  | O474              | -4.858239118     | -5.455908154                  | 8.498510554  |
|  | O475              | -2.812981990     | -4.091147897                  | 7.108579786  |
|  | O476              | 4.657715583      | 2.946370014                   | -3.902726960 |
|  | O477              | -3.603454282     | -10.394435025                 | 7.023939876  |
|  | O478              | -4.707603896     | -7.731375072                  | 6.890172883  |
|  | S479              | 3.896301108      | 3.682736603                   | 4.096823259  |
|  | S480              | 3.401369364      | 0.279646403                   | 2.566410032  |
|  | S481              | 1.745905925      | -4.536654448                  | 2.486773289  |
|  | S482              | 0.840704958      | 1.802528468                   | 4.087663490  |
|  | S483              | 0.745117860      | -1.470403537                  | 0.720562827  |
|  | S484              | 4.258758723      | -2.873563930                  | 4.738739722  |
|  | S485              | -1.513795904     | -3.128916264                  | 3.332190473  |
|  | S486              | 3.032327228      | 0.342758516                   | 6.169269434  |
|  | S487              | 0.857862923      | -4.043128986                  | 6.015393336  |
|  | S488              | -0.895494972     | -0.775370674                  | 6.331700772  |
|  | <b>13 (S=3/2)</b> |                  | <b>bm12b6x2h2xxtatf.car_2</b> |              |
|  | Fe(139) 2.327     | C1 -2.655651330  | -3.050113620                  | -8.938677576 |
|  | Fe(140) -1.120    | C2 -3.267982828  | -3.615772196                  | -7.652598380 |
|  | Fe(141) 2.773     | C3 -5.343284097  | -4.179771587                  | -6.455551622 |
|  | Fe(142) -2.662    | C4 -5.002186605  | -5.579219765                  | -5.948588183 |
|  | Fe(143) 2.869     | C5 -4.303358262  | -7.857830655                  | -6.476869689 |
|  | Fe(144) -2.280    | C6 -2.975630977  | -7.909061164                  | -5.709569937 |
|  |                   | C7 -0.773363579  | -6.874500742                  | -5.408179510 |
|  |                   | C8 -0.938665122  | -6.196943330                  | -4.045792708 |
|  |                   | C9 -2.103532613  | -4.533121033                  | -2.701616962 |
|  |                   | C10 -2.704763882 | -5.493218014                  | -1.664931989 |
|  |                   | C11 -4.277987079 | -7.262002039                  | -1.156657362 |

Fe(145) 0.959  
xt constrained model

|     |               |               |              |
|-----|---------------|---------------|--------------|
| C12 | -3.313891940  | -8.357764749  | -0.684817641 |
| C13 | -1.755829728  | -10.119802384 | -1.343286908 |
| C14 | -0.382090872  | -9.822263367  | -0.725063740 |
| C15 | 1.625571257   | -8.408318568  | -0.798356737 |
| C16 | 1.839768010   | -7.173282255  | 0.080720550  |
| C17 | 0.875014156   | -5.115040628  | 1.036075042  |
| C18 | 0.225439060   | -5.403020287  | 2.400442678  |
| C19 | 0.333984389   | -3.836265379  | 0.361974659  |
| C20 | 0.218097244   | -2.706622071  | 1.390049188  |
| C21 | 1.219590243   | -3.451277100  | -0.828113144 |
| C22 | -1.826946115  | -6.065172303  | 3.600111154  |
| C23 | -1.448534429  | -7.500018435  | 4.024746437  |
| C24 | -3.347406015  | -5.852010292  | 3.417599846  |
| C25 | -4.130537017  | -6.416245972  | 4.609274473  |
| C26 | -3.663306939  | -4.365391534  | 3.209328179  |
| C27 | -1.111730663  | -9.801903454  | 3.305197978  |
| C28 | -2.061758900  | -10.660622615 | 4.108661386  |
| C29 | 10.638143690  | -7.622418598  | -3.081008414 |
| C30 | 10.436242255  | -6.432240873  | -2.142733999 |
| C31 | 9.159794727   | -5.698793213  | -0.116088409 |
| C32 | 9.762271889   | -6.204625899  | 1.209501203  |
| C33 | 7.628477458   | -5.573494270  | -0.054708363 |
| C34 | 7.114206823   | -4.598227997  | 1.009240368  |
| C35 | 5.641819897   | -4.262674687  | 0.753994765  |
| C36 | 4.099270237   | -3.562180109  | 2.604663256  |
| C37 | 11.253180472  | -5.666161790  | 3.076955558  |
| C38 | 10.660895655  | -5.054999129  | 4.329590024  |
| C39 | -2.757117317  | -0.353217839  | -5.224375602 |
| C40 | -3.888599785  | -0.166629378  | -4.201035605 |
| C41 | -1.410212785  | -0.206910530  | -4.482639960 |
| C42 | -0.160443279  | -0.750420664  | -5.216562891 |
| C43 | 0.503721435   | 0.238062912   | -6.170736941 |
| C44 | -5.436236571  | 1.517775547   | -3.240189165 |
| C45 | -6.686115979  | 0.644241119   | -3.106144654 |
| C46 | -5.788663264  | 2.992443988   | -3.560537055 |
| C47 | -8.254971528  | -0.871231154  | -4.223622964 |
| C48 | -8.011122035  | -2.186099845  | -3.470586635 |
| C49 | -6.378650544  | -3.619269759  | -2.326629135 |
| C50 | -6.078578824  | -3.302594849  | -0.856728456 |
| C51 | -5.805645429  | -1.587796106  | 0.876301302  |
| C52 | -7.180016703  | -1.707128284  | 1.567025067  |
| C53 | -5.359052707  | -0.122812060  | 1.034792765  |
| C54 | -4.054056574  | 0.264268467   | 0.413943231  |
| C55 | -2.876619586  | -0.440555399  | 0.276778735  |
| C56 | -2.635598580  | 1.591249267   | -0.561798709 |
| C57 | -9.547263580  | -1.078344895  | 1.386663625  |
| C58 | -10.064171141 | -2.466822520  | 1.764994254  |
| C59 | -10.448156919 | -0.431015189  | 0.314984254  |
| C60 | -11.754542809 | 0.126489578   | 0.799200642  |
| C61 | -12.495950084 | -0.157216533  | 1.928668481  |
| C62 | -13.499543778 | 1.402799840   | 0.715799532  |
| C63 | 5.510215979   | -2.159235687  | 7.734810958  |
| C64 | 7.000427081   | -2.349665327  | 7.528452492  |
| C65 | 4.840207212   | -2.271977506  | 6.341500732  |
| C66 | 3.337767393   | -2.133919339  | 6.411661573  |
| C67 | 2.513375059   | -3.244030639  | 6.672332912  |
| C68 | 2.721018086   | -0.885959629  | 6.210952507  |
| C69 | 1.120652280   | -3.118894933  | 6.719851132  |
| C70 | 1.334418916   | -0.743757464  | 6.267446854  |
| C71 | 0.536260969   | -1.863698990  | 6.519592761  |
| C72 | 0.223282938   | 4.259915853   | 7.849064255  |
| C73 | -1.151692953  | 4.931135750   | 7.733366051  |
| C74 | 0.520821872   | 3.438346173   | 6.585476773  |
| C75 | -2.360358764  | 7.037219441   | 7.331307686  |
| C76 | -3.136168510  | 6.813936749   | 6.032229791  |
| C77 | -3.122971163  | 5.851868762   | 3.757700633  |
| C78 | -3.701537116  | 4.422008811   | 3.809297107  |
| C79 | -2.141681898  | 6.057182296   | 2.589026967  |
| C80 | -2.650770694  | 5.699084687   | 1.186659008  |
| C81 | -3.744654660  | 6.602797816   | 0.594558352  |
| C82 | -6.075471872  | 6.883422588   | 1.434922797  |
| C83 | -3.391442899  | 2.068508088   | 4.314364613  |
| C84 | -4.407387693  | 1.768955342   | 5.431643066  |
| C85 | -2.265919323  | 1.028908080   | 4.416294439  |
| C86 | -4.838738633  | 2.025352457   | 7.826506913  |
| C87 | -5.995342173  | 2.795344407   | 8.452547939  |
| C88 | -7.630499005  | 4.615019871   | 8.242416155  |
| C89 | -9.035402769  | 3.978838990   | 8.189946730  |
| C90 | -7.622067778  | 6.013458846   | 7.591256101  |
| C91 | -7.956934311  | 5.967104761   | 6.102912933  |

|       |               |               |              |
|-------|---------------|---------------|--------------|
| C92   | -10.501812140 | 2.362722177   | 7.083367687  |
| C93   | -11.114892898 | 1.787188145   | 8.351780698  |
| C94   | -10.385652371 | 1.242924609   | 6.014894915  |
| C95   | -9.806980414  | 1.761079058   | 4.719276673  |
| C96   | -10.615700408 | 2.448070178   | 3.799817306  |
| C97   | -8.437522442  | 1.630848365   | 4.434096682  |
| C98   | -10.079867154 | 2.992814591   | 2.632733474  |
| C99   | -7.879226480  | 2.192143759   | 3.282159371  |
| C100  | -8.709019872  | 2.871442807   | 2.391453837  |
| C101  | 6.840093488   | 7.505868865   | -3.356734382 |
| C102  | 5.480460257   | 7.101154281   | -3.918141741 |
| C103  | 3.354407690   | 5.950686439   | -3.413085336 |
| C104  | 2.185428148   | 6.740709564   | -2.818896562 |
| C105  | 1.064542631   | 7.424088828   | -0.751884786 |
| C106  | 1.421290073   | 8.177094970   | 0.526466583  |
| C107  | 2.923037905   | 8.470745181   | 2.431420417  |
| C108  | 3.811459561   | 9.696205214   | 2.389651210  |
| C109  | 1.367472077   | 7.005703232   | -7.348109154 |
| C110  | -0.156500404  | 6.981271312   | -7.174948517 |
| C111  | 1.884217185   | 5.549108508   | -7.230099869 |
| C112  | 3.364035102   | 5.418257717   | -7.582488397 |
| C113  | 3.857638539   | 3.986774021   | -7.578595817 |
| C114  | -2.040614581  | 6.852560458   | -5.607042350 |
| C115  | -2.490166940  | 7.886796737   | -4.592228626 |
| C116  | -2.459748575  | 5.397570518   | -5.277179740 |
| C117  | -1.536448245  | 4.703216172   | -4.304084435 |
| C118  | -1.625205439  | 4.929063356   | -2.919073317 |
| C119  | -0.525245924  | 3.850277637   | -4.779297670 |
| C120  | -0.704493030  | 4.345071951   | -2.042371387 |
| C121  | 0.395518668   | 3.267294950   | -3.902043579 |
| C122  | 0.314812693   | 3.519583780   | -2.529400492 |
| C123  | 10.637791097  | 2.661892968   | -1.374482721 |
| C124  | 11.468223408  | 1.802676495   | -0.408747498 |
| C125  | 9.755187795   | 1.812941500   | -2.303913175 |
| C126  | 8.791639586   | 2.582769551   | -3.153458012 |
| C127  | 9.092305867   | 3.487795620   | -4.152459937 |
| C128  | 6.902387158   | 3.177706416   | -4.067030131 |
| C129  | 12.911904470  | -0.117016686  | -0.039802196 |
| C130  | 13.995414302  | 0.684681556   | 0.647206745  |
| C131  | 4.501965014   | -2.463073634  | -4.808032896 |
| C132  | 5.494905707   | -2.416018259  | -3.684416537 |
| C133  | 6.519776724   | -1.211115481  | -3.788307866 |
| C134  | 7.317311159   | -1.311541305  | -5.118321856 |
| C135  | 8.443919570   | -0.264938733  | -5.195169412 |
| C136  | 9.429138107   | -0.532396460  | -6.295888224 |
| C137  | 7.538629078   | -1.434491481  | -2.627037152 |
| C138  | 3.624409977   | 2.141759774   | 0.854834600  |
| Fe139 | 4.886306180   | 3.097586808   | -0.386929964 |
| Fe140 | 1.597053529   | 2.145100883   | 1.197875014  |
| Fe141 | 3.747989136   | 1.760188318   | 2.784653546  |
| Fe142 | 3.570835207   | 4.042163831   | 1.541731966  |
| Fe143 | 1.783527941   | 3.590012934   | 3.423878130  |
| Fe144 | 5.121442455   | 0.842015261   | 0.833111657  |
| Fe145 | 3.298864168   | 1.137407670   | -1.002008716 |
| H146  | -0.719154380  | -3.122284891  | -8.299999177 |
| H147  | -1.353387324  | -1.611287037  | -8.275758887 |
| H148  | -5.155986266  | -3.368738183  | -8.421657275 |
| H149  | -3.335992016  | -2.303371351  | -9.375976999 |
| H150  | -2.625718235  | -3.890986353  | -9.654186650 |
| H151  | -5.150507443  | -3.492355395  | -5.619431904 |
| H152  | -4.692306808  | -6.254405425  | -7.863892602 |
| H153  | -6.419031247  | -4.149483050  | -6.677628251 |
| H154  | -4.221823508  | -8.478591183  | -7.378766521 |
| H155  | -2.288954671  | -6.312304866  | -6.795711228 |
| H156  | -5.067606960  | -8.296985941  | -5.822355141 |
| H157  | -1.182781915  | -4.128609014  | -2.62412247  |
| H158  | -2.257067341  | -4.810538077  | -4.832034844 |
| H159  | -0.085501430  | -6.283270747  | -6.027593237 |
| H160  | -4.627778592  | -6.725512287  | -0.265838912 |
| H161  | -4.026410707  | -6.269763142  | -3.057747777 |
| H162  | -0.315665645  | -7.854418682  | -5.224586942 |
| H163  | -2.794835412  | -3.696225363  | -2.879845375 |
| H164  | -2.725551851  | -8.716100320  | -2.638939399 |
| H165  | -5.142580600  | -7.733398639  | -1.643815567 |
| H166  | 1.320631150   | -4.285971420  | -1.539575179 |
| H167  | 0.798518162   | -2.587438441  | -1.363377853 |
| H168  | 2.229632696   | -3.159373660  | -0.498038850 |
| H169  | -0.677025713  | -4.062005811  | -0.008889125 |
| H170  | -1.590669939  | -10.686206311 | -2.271454637 |
| H171  | -3.110455804  | -3.945224664  | 2.356888826  |

|      |               |               |              |
|------|---------------|---------------|--------------|
| H172 | -2.020112098  | -8.259826891  | 2.172150346  |
| H173 | -4.006609926  | -7.505007480  | 4.703311451  |
| H174 | -0.134444008  | -1.787139947  | 0.904989296  |
| H175 | 1.190822752   | -2.478928655  | 1.852279335  |
| H176 | 5.148939325   | -3.003680277  | 8.352294261  |
| H177 | -4.736364723  | -4.229634732  | 3.0132879302 |
| H178 | -5.202298420  | -6.204466361  | 4.482507945  |
| H179 | -3.399819438  | -3.783880825  | 4.107854181  |
| H180 | -3.802673842  | -5.948139894  | 5.551780283  |
| H181 | -3.659425397  | -6.405199309  | 2.512879343  |
| H182 | -1.469306837  | -5.430730173  | 4.424686152  |
| H183 | -1.600204615  | -5.682918320  | 1.494571553  |
| H184 | -0.487529541  | -2.951590613  | 2.198824931  |
| H185 | -1.447368593  | 1.303077976   | 3.726096851  |
| H186 | -2.688224566  | 0.064514190   | 4.093565523  |
| H187 | -1.505709478  | 0.029621052   | 5.930534489  |
| H188 | -1.286315408  | -2.519152971  | 6.694605056  |
| H189 | 0.871307469   | 0.225464555   | 6.077168565  |
| H190 | 3.329348645   | -0.014391139  | 5.957669356  |
| H191 | 2.962512930   | -4.230105810  | 6.821579925  |
| H192 | -0.059254973  | -6.489742502  | -0.321221204 |
| H193 | 2.252441753   | -8.275855970  | -1.693709009 |
| H194 | 2.017313647   | -9.264840215  | -0.235426969 |
| H195 | -0.144873295  | -8.173224170  | -1.958610359 |
| H196 | -2.278186620  | -10.768806995 | -0.627880299 |
| H197 | 0.494441760   | -3.997331009  | 6.893712925  |
| H198 | 1.939213991   | -4.972511597  | 1.247481773  |
| H199 | -0.930398896  | -10.312183165 | 2.343673301  |
| H200 | -0.144141565  | -9.802097025  | 3.836456155  |
| H201 | -1.645694755  | -11.670731461 | 4.347237648  |
| H202 | 12.316268038  | -5.389254081  | 3.006984787  |
| H203 | 2.307013741   | 1.107420939   | -6.595581332 |
| H204 | 5.699309758   | -3.676417748  | -5.712250020 |
| H205 | 3.561380890   | 5.836905591   | -8.586117713 |
| H206 | 3.993249171   | 5.995129280   | -6.880876978 |
| H207 | 1.294659052   | 4.908044615   | -7.903667046 |
| H208 | -1.935274819  | 8.852575733   | -4.648964267 |
| H209 | 1.516691732   | 7.328489005   | -8.390013446 |
| H210 | -1.264046577  | 0.853540892   | -4.220415251 |
| H211 | -0.432680566  | -1.644837874  | -5.802117754 |
| H212 | 0.035120860   | 7.024738842   | -5.106791942 |
| H213 | -2.556042551  | 7.146144689   | -6.543420004 |
| H214 | 1.949192552   | 7.738075827   | -5.492676838 |
| H215 | 2.379183358   | -0.124013543  | -5.347361620 |
| H216 | 1.710739458   | 5.173774077   | -6.210214838 |
| H217 | 2.997520786   | 8.069863638   | -6.701870439 |
| H218 | -3.503921912  | 0.249437096   | -7.049193645 |
| H219 | -1.502289630  | -0.758268246  | -3.535125517 |
| H220 | 5.586006974   | 4.699383909   | -8.046400617 |
| H221 | 0.570378445   | -1.082643885  | -4.465727750 |
| H222 | -5.131300904  | -2.270961916  | 1.407801319  |
| H223 | -2.599677938  | -1.451167953  | 0.556265543  |
| H224 | -7.228109251  | -4.313694507  | -2.326215399 |
| H225 | -5.960223399  | -1.841616883  | -3.418839082 |
| H226 | -8.033115265  | -0.848738713  | -0.106336726 |
| H227 | -12.334397177 | -0.841428541  | 2.754496597  |
| H228 | -9.733447854  | -3.270621195  | 1.062066755  |
| H229 | -10.617459094 | -1.152515871  | -0.504744249 |
| H230 | -9.524879916  | -0.452679949  | 2.293317116  |
| H231 | -14.248456148 | 2.132345522   | 0.418854702  |
| H232 | -5.344103129  | 0.077233450   | 2.119913287  |
| H233 | -6.133158564  | 0.529555164   | 0.603270165  |
| H234 | -14.349525760 | 0.718166946   | 2.544577662  |
| H235 | -9.880793428  | 0.402188502   | -0.130336742 |
| H236 | -5.971424751  | -1.272990059  | -1.235651851 |
| H237 | -5.519747855  | -4.160593814  | -2.746192616 |
| H238 | -9.130759193  | -0.406033974  | -3.749433748 |
| H239 | -2.165078247  | 2.440418204   | -1.049217028 |
| H240 | -8.527289555  | -1.111822061  | -5.260003126 |
| H241 | -0.994212944  | 0.233911280   | -0.521903986 |
| H242 | 5.494437065   | -0.861694969  | 9.320670738  |
| H243 | 4.283606910   | -0.603012439  | 8.250507913  |
| H244 | -1.906796158  | 3.639814321   | 4.531062871  |
| H245 | -3.923619148  | 1.902493398   | 3.366131721  |
| H246 | -3.492619073  | 3.140712451   | 6.652574766  |
| H247 | -5.154253928  | 2.862667642   | -0.054356006 |
| H248 | -6.387342262  | 3.549537624   | -1.761991213 |
| H249 | -6.618875028  | 3.246395929   | 0.453266409  |
| H250 | -4.838330629  | 3.559961251   | -3.549685272 |
| H251 | -6.202489407  | 3.049930759   | -4.580165006 |

|      |               |              |              |
|------|---------------|--------------|--------------|
| H252 | -6.641811502  | 6.477346711  | 7.774680888  |
| H253 | -8.391309561  | 6.617180844  | 8.092360792  |
| H254 | -5.979284197  | 6.465235708  | 5.571123351  |
| H255 | -7.070666678  | 6.067232843  | 4.258995795  |
| H256 | -6.689283354  | 8.729997409  | 2.079904059  |
| H257 | -3.650714490  | 6.637239165  | -0.50131769  |
| H258 | -10.720807540 | 3.514725840  | 1.917269806  |
| H259 | -7.778767614  | 1.077733151  | 5.108065060  |
| H260 | -7.343034011  | 5.289077232  | 1.714035667  |
| H261 | -1.234944056  | 5.459742389  | 2.775182856  |
| H262 | -1.520618498  | 5.856465692  | 5.178085336  |
| H263 | -2.973058106  | 4.646326692  | 1.143155500  |
| H264 | -6.612237007  | 0.194439201  | -5.103295551 |
| H265 | -2.115537684  | 8.106207216  | 7.396107012  |
| H266 | -4.114958027  | 1.654235577  | -4.982781592 |
| H267 | -1.827665108  | 7.113678901  | 2.601820541  |
| H268 | -6.806676728  | 2.120779276  | 3.098329702  |
| H269 | -8.825689620  | 3.662169420  | 0.614396041  |
| H270 | -3.057408559  | 6.803329289  | 8.148344728  |
| H271 | -5.255982223  | 8.748080245  | 1.108842004  |
| H272 | -8.067868576  | 6.840717228  | 1.853258261  |
| H273 | -1.955986070  | 0.782157407  | -6.735627581 |
| H274 | -2.841135743  | -1.407794200 | -5.550164603 |
| H275 | -11.684725754 | 2.556126410  | 3.994008794  |
| H276 | -4.954762395  | 1.476651978  | -2.250951648 |
| H277 | -3.994714412  | 6.509729673  | 3.647210134  |
| H278 | -3.605884590  | 7.628702970  | 0.959369541  |
| H279 | -1.781271599  | 5.774907878  | 0.517513244  |
| H280 | -5.336375666  | 5.164136582  | 0.653451409  |
| H281 | -5.191259819  | 0.994376238  | 7.673710870  |
| H282 | -6.131276347  | 4.004027951  | 6.803527503  |
| H283 | -7.420827406  | 4.740298133  | 9.314438163  |
| H284 | -4.033729360  | 2.001597593  | 8.574882559  |
| H285 | -8.420572669  | 2.695636428  | 6.728411179  |
| H286 | 6.742039345   | 7.759084143  | -2.290038165 |
| H287 | 7.478094353   | 6.600181644  | -3.409127661 |
| H288 | 9.986764129   | 3.274687516  | -0.734367317 |
| H289 | 8.387406608   | 8.680274775  | -3.996331972 |
| H290 | 7.182190456   | 8.488879099  | -5.095606159 |
| H291 | 1.541803872   | 3.044774025  | 6.664134284  |
| H292 | -0.491842287  | 2.742795501  | 9.004378006  |
| H293 | -0.245410033  | 6.725658049  | 7.322414219  |
| H294 | -0.184231282  | 2.597303968  | 6.516789922  |
| H295 | 0.202323541   | 3.937990968  | 9.874157564  |
| H296 | 3.398365070   | 7.699088727  | 3.056398140  |
| H297 | 0.995587879   | 5.038442197  | 7.949191946  |
| H298 | 7.196673567   | -6.575467955 | 0.109539149  |
| H299 | 9.596461202   | -4.727378255 | -0.378635133 |
| H300 | 3.216321202   | 7.162006281  | 0.782787768  |
| H301 | 2.985048951   | -2.676518088 | 4.054189895  |
| H302 | 0.603143722   | 8.143165680  | -1.439757775 |
| H303 | 1.185223787   | 2.617159110  | -4.283650691 |
| H304 | 0.282143854   | 6.703588060  | -0.460539593 |
| H305 | 5.025821859   | -5.172546376 | 0.733740235  |
| H306 | 2.770681536   | 6.112807073  | -0.955207015 |
| H307 | 5.536998590   | -3.799871826 | -0.241183170 |
| H308 | 7.302734816   | -5.237699085 | -1.053593707 |
| H309 | 7.688202413   | -3.658986038 | 0.983880784  |
| H310 | 7.227168204   | -5.029141250 | 2.017534739  |
| H311 | -2.485913546  | 4.836527144  | -6.222330806 |
| H312 | 9.152370617   | -7.593081414 | -1.145096449 |
| H313 | 10.168556782  | -7.337073231 | -4.034974895 |
| H314 | 1.043993905   | 3.073696374  | -1.847428136 |
| H315 | 10.700686728  | -9.400319483 | -2.041522682 |
| H316 | 9.757455809   | -9.458313157 | -3.380125401 |
| H317 | 5.342713250   | -2.332336101 | 1.612021143  |
| H318 | -0.761827889  | 4.533436289  | -0.967956675 |
| H319 | -0.459085578  | 3.640601156  | -5.849837786 |
| H320 | 11.968987946  | -1.797352788 | -3.120932055 |
| H321 | 10.406912647  | 1.222452296  | -2.972499364 |
| H322 | 9.914786281   | -2.480268743 | -2.083398362 |
| H323 | 11.930085264  | -1.089796785 | -4.494425984 |
| H324 | 3.978443028   | 10.130852211 | 1.374311681  |
| H325 | 8.063246922   | -1.015478790 | -0.025326307 |
| H326 | 6.062642814   | -3.356048082 | -3.619365631 |
| H327 | 4.975005830   | 6.279271310  | -2.080797236 |
| H328 | 7.751730121   | -2.321394132 | -5.187958375 |
| H329 | 7.755729970   | 4.497879171  | -5.485597321 |
| H330 | 5.849974687   | 3.274287467  | -4.307346902 |
| H331 | 11.723202592  | -7.688313527 | -3.269839808 |



|       |               |              |              |
|-------|---------------|--------------|--------------|
| H332  | 3.913562562   | -1.573019215 | 3.074552363  |
| H333  | 9.928937233   | -2.117429788 | 1.063555416  |
| H334  | 7.766163900   | -0.644277037 | 1.449371347  |
| H335  | 10.638852786  | -4.338190623 | 1.493259430  |
| H336  | 4.051128035   | -5.591276231 | 2.362486331  |
| H337  | 9.585269868   | -0.656212268 | -8.177594073 |
| H338  | 7.997743585   | 0.729868339  | -5.337623651 |
| H339  | 9.017848325   | -0.249567444 | -4.262640085 |
| H340  | 6.626037565   | -1.166949558 | -5.961583315 |
| H341  | 3.292646722   | 4.898797371  | -3.090363039 |
| H342  | -2.414747996  | 5.581056550  | -2.537255288 |
| H343  | -3.486558998  | 5.442940288  | -4.883267219 |
| H344  | 4.940702459   | -2.260127296 | -2.748891720 |
| H345  | 10.888669819  | -2.604158118 | -0.053283706 |
| H346  | 10.967103114  | -3.631029800 | -2.019497307 |
| H347  | 2.743533625   | -4.953373891 | 3.271950918  |
| H348  | 10.040544154  | 3.891552808  | -4.487548314 |
| H349  | 9.189793472   | 1.092938237  | -1.698648589 |
| H350  | 3.275258508   | 5.998169926  | -4.502897785 |
| H351  | 1.979639594   | 8.766808489  | 2.920647198  |
| H352  | 5.112959154   | -3.250248378 | 5.916946470  |
| H353  | 5.256490699   | -1.494983959 | 5.680296746  |
| H354  | 12.002173751  | 4.191029346  | -1.470660826 |
| H355  | 12.232834315  | 3.049664185  | -2.620206844 |
| H356  | 13.412359390  | -0.874481042 | -0.663421301 |
| H357  | 11.951093575  | 0.386960148  | -1.872736929 |
| H358  | 14.294405078  | 1.623137239  | 0.120827279  |
| H359  | 12.309950470  | -0.653035898 | 0.711053851  |
| H360  | 7.535597904   | -1.427592932 | 7.197426679  |
| H361  | -10.380139103 | 1.452871981  | 9.122576339  |
| H362  | 11.191665604  | -6.762615955 | 3.193155771  |
| H363  | 9.584243563   | -4.767712312 | 4.255886389  |
| H364  | -11.179596134 | 3.149054034  | 6.711239023  |
| H365  | -9.763848972  | 0.424907265  | 6.411079738  |
| H366  | -11.397005854 | 0.841431936  | 5.855624927  |
| H367  | 1.863900366   | -0.575675579 | 0.785241470  |
| H368  | 2.518547527   | 0.810187408  | -2.274956335 |
| H369  | -0.049389409  | 2.393705590  | 0.867275031  |
| H370  | -0.054391702  | 1.891032940  | 1.517709055  |
| Mo371 | 5.879900405   | 0.987763050  | -1.812174342 |
| N372  | -1.324256851  | -2.479237958 | -8.817156423 |
| N373  | -4.622142335  | -3.766353803 | -7.652420624 |
| N374  | -4.683298947  | -6.512046189 | -6.879950318 |
| N375  | -2.023036504  | -7.038258902 | -6.132922313 |
| N376  | -1.826245576  | -5.175549273 | -3.979194506 |
| N377  | -3.674779691  | -6.331264004 | -2.099076440 |
| N378  | -2.586032474  | -8.968925868 | -1.658246578 |
| N379  | 0.262362311   | -8.718054244 | -1.191832157 |
| N380  | 0.807962269   | -6.295704543 | 0.178164744  |
| N381  | -1.101319705  | -5.679748174 | 2.387272087  |
| N382  | -1.545634129  | -8.450533561 | 3.056227622  |
| N383  | 10.028002452  | -8.864944113 | -2.594565837 |
| N384  | 9.532326265   | -6.640732783 | -1.167379599 |
| N385  | 5.083742646   | -3.319183110 | 1.725515918  |
| N386  | 3.710567549   | -4.815353705 | 2.927084659  |
| N387  | 3.472212540   | -2.515091091 | 3.174378520  |
| N388  | 10.541509608  | -5.309022472 | 1.864195811  |
| N389  | -2.887800615  | 0.614911358  | -6.318894506 |
| N390  | 1.824245001   | 0.437936322  | -5.994570928 |
| N391  | -4.503227684  | 1.038147699  | -4.254677114 |
| N392  | -7.138839389  | 0.056979159  | -4.244096077 |
| N393  | -6.717602730  | -2.491039928 | -3.173248265 |
| N394  | -5.884917084  | -1.996256725 | -0.522659026 |
| N395  | -3.890807172  | 1.536739926  | -0.115473636 |
| N396  | -1.994566481  | 0.414198403  | -0.349288499 |
| N397  | -8.212484709  | -1.215874660 | 0.827775202  |
| N398  | -12.393374838 | 1.099798187  | 0.048384850  |
| N399  | -13.600311556 | 0.668134054  | 1.859924740  |
| N400  | 5.277961477   | -0.837682838 | 8.321152820  |
| N401  | 0.312174189   | 3.379068165  | 9.022880817  |
| N402  | -1.139560133  | 6.272002330  | 7.490620494  |
| N403  | -2.473499614  | 6.223550403  | 5.015173807  |
| N404  | -5.103834858  | 6.146237020  | 0.909456963  |
| N405  | -5.946940031  | 8.211912793  | 1.621778780  |
| N406  | -7.213122687  | 6.289567792  | 1.882751139  |
| N407  | -2.899428742  | 3.443115066  | 4.311686884  |
| N408  | -4.306112810  | 2.523015862  | 6.567872487  |
| N409  | -6.580389162  | 3.764193102  | 7.688167871  |
| N410  | -6.910319766  | 6.158910365  | 5.262050994  |
| N411  | -9.186911188  | 2.918783740  | 7.360287848  |

|                                   |                            |               |              |
|-----------------------------------|----------------------------|---------------|--------------|
| N412                              | 7.370903536                | 8.652937170   | -4.101478534 |
| N413                              | 4.654809803                | 6.485250411   | -3.036787388 |
| N414                              | 2.128702404                | 6.744784026   | -1.466716608 |
| N415                              | 2.618071366                | 7.926997239   | 1.119871427  |
| N416                              | 1.999799905                | 8.011152456   | -6.482827823 |
| N417                              | -0.623031237               | 7.020781170   | -5.893008411 |
| N418                              | 11.507514278               | 3.585064374   | -2.132000285 |
| N419                              | 7.410135221                | 2.404165488   | -3.110628263 |
| N420                              | 7.888250438                | 3.849056053   | -4.715275840 |
| N421                              | 12.095221963               | 0.704714654   | -0.914895060 |
| O422                              | -2.567784698               | -3.976982419  | -6.688345918 |
| O423                              | -5.040384101               | -5.834831300  | -4.734408757 |
| O424                              | -2.797745796               | -8.718736511  | -4.786097873 |
| O425                              | -0.294874648               | -6.582215346  | -3.055538610 |
| O426                              | -2.318560019               | -5.494029045  | -0.483539528 |
| O427                              | -3.236075188               | -8.685665154  | 0.510298659  |
| O428                              | 0.098481402                | -10.596442119 | 0.116161249  |
| O429                              | 2.939044068                | -7.013736959  | 0.638310369  |
| O430                              | 0.895523832                | -5.376746298  | 3.452507372  |
| O431                              | -1.044663947               | -7.749891295  | 5.169435469  |
| O432                              | -3.181115425               | -10.336422937 | 4.469905584  |
| O433                              | 11.075220702               | -5.376754175  | -2.339645629 |
| O434                              | 9.550629671                | -7.366331605  | 1.601000209  |
| O435                              | 11.293972912               | -4.895984273  | 5.361891517  |
| O436                              | -4.203169267               | -1.068061349  | -3.395976880 |
| O437                              | -0.143483050               | 0.837743448   | -7.059894306 |
| O438                              | -7.241256220               | 0.477069302   | -2.006253656 |
| O439                              | -6.750780055               | 3.548342357   | -2.689030471 |
| O440                              | -8.976465734               | -2.907403681  | -3.181810723 |
| O441                              | -6.026125311               | -4.226217857  | -0.033853814 |
| O442                              | -7.324129737               | -2.143330975  | 2.713887324  |
| O443                              | -10.794941776              | -2.708199805  | 2.710871449  |
| O444                              | 7.589169874                | -3.411549339  | 7.681218279  |
| O445                              | -0.832749253               | -1.673438807  | 6.526693945  |
| O446                              | -2.216762542               | 4.299443750   | 7.865867377  |
| O447                              | -4.316847220               | 7.216194162   | 5.965211079  |
| O448                              | -4.852713684               | 4.197241127   | 3.401287889  |
| O449                              | -5.214899885               | 0.840801006   | 5.292642984  |
| O450                              | -1.790930813               | 0.950401293   | 5.762018654  |
| O451                              | -6.386221432               | 2.512139819   | 9.592914213  |
| O452                              | -9.955628749               | 4.415486746   | 8.897417468  |
| O453                              | -9.107937092               | 5.714461204   | 5.708887542  |
| O454                              | -12.317900435              | 1.641291994   | 8.502071512  |
| O455                              | -8.122862692               | 3.454307075   | 1.260087452  |
| O456                              | 5.191105544                | 7.298065295   | -5.115476090 |
| O457                              | 1.356665042                | 7.333154428   | -3.545363708 |
| O458                              | 0.577173376                | 8.955255305   | 1.002654263  |
| O459                              | 4.309505166                | 10.193805859  | 3.387282461  |
| O460                              | -0.915500936               | 6.876825252   | -8.153844185 |
| O461                              | 3.182332910                | 3.000260657   | -7.344533983 |
| O462                              | 5.184636461                | 3.826613221   | -7.866667036 |
| O463                              | -3.405353270               | 7.729602235   | -3.796378391 |
| O464                              | 11.638457526               | 2.136998652   | 0.778460894  |
| O465                              | 14.566014711               | 0.318495455   | 1.665003139  |
| O466                              | 3.440075830                | -1.860697796  | -4.849257857 |
| O467                              | 4.837183607                | -3.251355428  | -5.883705629 |
| O468                              | 10.618598253               | -0.803220153  | -6.143134096 |
| O469                              | 8.872472518                | -0.456372366  | -7.533755099 |
| O470                              | 7.551013905                | -0.517092362  | -1.720356906 |
| O471                              | 8.299319183                | -2.432442962  | -2.639124230 |
| O472                              | 5.871198308                | 0.001529738   | -3.674203310 |
| O473                              | 10.764507310               | -2.633285641  | 0.932625129  |
| O474                              | 8.266539685                | -1.284743654  | 0.905884560  |
| O475                              | -5.871453108               | 3.573763427   | -0.094085769 |
| O476                              | 12.528431288               | -1.258892038  | -3.737590892 |
| O477                              | 10.876264205               | -2.655932281  | -1.862675513 |
| S478                              | 0.387355348                | 4.439600329   | 5.035141725  |
| S479                              | 1.358195208                | 4.438282739   | 1.403106028  |
| S480                              | 4.181716888                | 2.549122775   | -2.437947738 |
| S481                              | 1.563833897                | 1.307457649   | 3.301281212  |
| S482                              | 1.421230310                | 0.307913379   | -0.150837483 |
| S483                              | 4.779347647                | 5.280468969   | 0.130453151  |
| S484                              | 4.551240710                | -0.660089201  | -0.735888624 |
| S485                              | 4.052122646                | 3.857721639   | 3.713682582  |
| S486                              | 6.835790671                | 2.071814743   | 0.080760119  |
| S487                              | 5.310193276                | 0.141980341   | 2.925997821  |
| <b>14 (S=11)</b><br>Fe(139) 2.387 | bm12b6x262h2x1xtdhtm.car_3 |               |              |
| C1                                | -0.628650468               | -0.166882407  | -9.844517769 |
| C2                                | -1.765850554               | -0.592446002  | -8.912091009 |

|                      |        |     |               |               |              |
|----------------------|--------|-----|---------------|---------------|--------------|
| Fe(140)              | 0.023  | C3  | -4.143284995  | -0.352072509  | -8.335382918 |
| Fe(141)              | 1.481  | C4  | -4.543962747  | -1.818319256  | -8.186333969 |
| Fe(142)              | -2.609 | C5  | -4.630123219  | -4.053045041  | -9.166023805 |
| Fe(143)              | 2.056  | C6  | -3.705902945  | -4.807544274  | -8.200278546 |
| Fe(144)              | -2.400 | C7  | -1.474820287  | -4.903398112  | -7.192901185 |
| Fe(145)              | 1.401  | C8  | -1.761312479  | -4.465184973  | -5.753304168 |
| xt constrained model |        | C9  | -2.567822089  | -2.716927932  | -4.258617158 |
|                      |        | C10 | -3.779875627  | -3.465963825  | -3.685546362 |
|                      |        | C11 | -5.994019722  | -4.380011742  | -4.057175692 |
|                      |        | C12 | -5.725236098  | -5.854789928  | -3.736511605 |
|                      |        | C13 | -4.776749985  | -7.973072743  | -4.489684612 |
|                      |        | C14 | -3.703755091  | -8.406519231  | -3.479454891 |
|                      |        | C15 | -1.397880339  | -8.064635900  | -2.698771211 |
|                      |        | C16 | -0.990638010  | -7.209766770  | -1.497972165 |
|                      |        | C17 | -1.316937330  | -5.095450835  | -0.262261857 |
|                      |        | C18 | -2.417618918  | -5.217969266  | 0.805842830  |
|                      |        | C19 | -1.065733978  | -3.643824047  | -0.726585454 |
|                      |        | C20 | -0.980331184  | -2.691312279  | 0.468208583  |
|                      |        | C21 | 0.197154682   | -3.579296077  | -1.592787682 |
|                      |        | C22 | -4.835598017  | -5.050380516  | 1.287253273  |
|                      |        | C23 | -5.331011475  | -6.509952055  | 1.304276834  |
|                      |        | C24 | -5.945063907  | -4.031552841  | 0.932983967  |
|                      |        | C25 | -7.215608085  | -4.293308498  | 1.750785914  |
|                      |        | C26 | -5.450378469  | -2.597045216  | 1.150910805  |
|                      |        | C27 | -6.079630882  | -8.457052172  | 0.062712864  |
|                      |        | C28 | -5.195001333  | -9.411458264  | 0.838565265  |
|                      |        | C29 | 7.446292607   | -11.022695865 | -2.617146313 |
|                      |        | C30 | 7.434035156   | -10.028096793 | -1.455222992 |
|                      |        | C31 | 5.992146621   | -9.172463780  | 0.399628579  |
|                      |        | C32 | 5.925879092   | -10.096667680 | 1.630401785  |
|                      |        | C33 | 4.686795254   | -8.386598281  | 0.182118978  |
|                      |        | C34 | 4.296617906   | -7.483086668  | 1.356601151  |
|                      |        | C35 | 3.223150975   | -6.481186138  | 0.926678111  |
|                      |        | C36 | 1.621341915   | -5.338241321  | 2.480711082  |
|                      |        | C37 | 6.774123275   | -10.494157095 | 3.894379192  |
|                      |        | C38 | 6.093003338   | -9.855188918  | 5.085790554  |
|                      |        | C39 | -0.748323715  | 1.722307924   | -5.709701682 |
|                      |        | C40 | -2.017020370  | 2.198788834   | -4.986330429 |
|                      |        | C41 | 0.176374429   | 1.105935771   | -4.631549083 |
|                      |        | C42 | 1.331776198   | 0.212098487   | -5.138463148 |
|                      |        | C43 | 2.617112320   | 0.958523996   | -5.478370290 |
|                      |        | C44 | -3.019712420  | 4.168294192   | -3.861344074 |
|                      |        | C45 | -4.484423802  | 3.922858514   | -4.230238950 |
|                      |        | C46 | -2.693206122  | 5.680938025   | -3.786401040 |
|                      |        | C47 | -6.107909671  | 3.473371325   | -6.007190553 |
|                      |        | C48 | -6.656138809  | 2.121743554   | -5.530638570 |
|                      |        | C49 | -6.155613242  | -0.034399002  | -4.470117690 |
|                      |        | C50 | -6.184805672  | -0.090430151  | -2.938505946 |
|                      |        | C51 | -5.924250493  | 1.104457395   | -0.817011108 |
|                      |        | C52 | -7.393785909  | 1.416925081   | -0.462426299 |
|                      |        | C53 | -5.086205356  | 2.228468381   | -0.181931374 |
|                      |        | C54 | -3.595946050  | 2.148297206   | -0.312012449 |
|                      |        | C55 | -2.737394904  | 1.070280438   | -0.384481638 |
|                      |        | C56 | -1.572077869  | 2.947483058   | -0.386592376 |
|                      |        | C57 | -9.257149796  | 2.954036080   | -0.941917639 |
|                      |        | C58 | -10.309919234 | 1.858138793   | -0.797072250 |
|                      |        | C59 | -9.627559857  | 3.912159700   | -2.096665843 |
|                      |        | C60 | -10.641665367 | 4.972889981   | -1.784613193 |
|                      |        | C61 | -11.741086869 | 4.958389501   | -0.948799132 |
|                      |        | C62 | -11.560335763 | 6.925259835   | -1.954302113 |
|                      |        | C63 | 1.446763602   | -5.678554507  | 7.798262281  |
|                      |        | C64 | 2.740906633   | -6.469721149  | 7.826879729  |
|                      |        | C65 | 1.205657221   | -5.257098027  | 6.326907880  |
|                      |        | C66 | -0.084971186  | -4.496729491  | 6.133023327  |
|                      |        | C67 | -1.285438099  | -5.156745499  | 5.810248922  |
|                      |        | C68 | -0.117795695  | -3.096267947  | 6.255448034  |
|                      |        | C69 | -2.473316739  | -4.446258117  | 5.604091917  |
|                      |        | C70 | -1.296225000  | -2.374133211  | 6.061600258  |
|                      |        | C71 | -2.472835429  | -3.051827172  | 5.730212963  |
|                      |        | C72 | -0.741789503  | 2.153120500   | 8.543366893  |
|                      |        | C73 | -1.655376116  | 3.371714674   | 8.364608674  |
|                      |        | C74 | -0.471789901  | 1.504838529   | 7.179493924  |
|                      |        | C75 | -1.788211833  | 5.830275955   | 8.369652315  |
|                      |        | C76 | -2.118435276  | 6.243806916   | 6.933861389  |
|                      |        | C77 | -1.758656261  | 5.823297276   | 4.527209160  |
|                      |        | C78 | -2.828440484  | 4.847441928   | 3.990617073  |
|                      |        | C79 | -0.445609937  | 5.788186449   | 3.723576200  |
|                      |        | C80 | -0.544434134  | 6.064723404   | 2.218582502  |
|                      |        | C81 | -0.951556772  | 7.489432708   | 1.806495073  |
|                      |        | C82 | -3.156006797  | 8.611763430   | 2.109531147  |

|       |               |              |               |
|-------|---------------|--------------|---------------|
| C83   | -3.683317326  | 2.577767169  | 3.837194109   |
| C84   | -5.005446873  | 2.563559123  | 4.625329744   |
| C85   | -3.146874851  | 1.139354081  | 3.797106151   |
| C86   | -5.982238315  | 2.571366609  | 6.867163006   |
| C87   | -6.915888553  | 3.655053574  | 7.391863257   |
| C88   | -7.580337703  | 6.017910553  | 7.359785762   |
| C89   | -9.022259266  | 6.086345405  | 6.815082110   |
| C90   | -6.843114340  | 7.358912068  | 7.164838927   |
| C91   | -6.636786055  | 7.704780100  | 5.693212895   |
| C92   | -10.550704777 | 5.452922702  | 5.007696383   |
| C93   | -11.696586708 | 4.980193151  | 5.889695455   |
| C94   | -10.499609690 | 4.599004161  | 3.711684873   |
| C95   | -9.423870171  | 5.088249376  | 2.770530252   |
| C96   | -9.658413064  | 6.192680265  | 1.935683160   |
| C97   | -8.142528117  | 4.509636647  | 2.763860475   |
| C98   | -8.644930381  | 6.720811556  | 1.133236015   |
| C99   | -7.108939900  | 5.043075294  | 1.986718277   |
| C100  | -7.368988047  | 6.151538537  | 1.181190204   |
| C101  | 9.765503866   | 4.067453317  | 0.403162013   |
| C102  | 8.640266325   | 4.492516158  | -0.534932564  |
| C103  | 6.190720000   | 4.399285720  | -0.891100532  |
| C104  | 5.320567856   | 5.563740257  | -0.403342546  |
| C105  | 3.934420462   | 6.389583168  | 1.444197734   |
| C106  | 4.061431603   | 6.619590063  | 2.948991447   |
| C107  | 4.746883898   | 5.784908162  | 5.146387881   |
| C108  | 6.048516645   | 6.345967507  | 5.683198383   |
| C109  | 6.107301928   | 6.555554024  | -4.739170728  |
| C110  | 4.703066432   | 7.153586007  | -4.904779646  |
| C111  | 6.011387712   | 5.011066564  | -4.810892996  |
| C112  | 7.391767675   | 4.358027514  | -4.847559165  |
| C113  | 7.360410983   | 2.852944609  | -4.982354500  |
| C114  | 2.585363288   | 7.748190862  | -3.815287185  |
| C115  | 2.338370956   | 8.720896634  | -2.677373071  |
| C116  | 1.513380274   | 6.638157431  | -3.956051588  |
| C117  | 1.749887738   | 5.490099377  | -3.009573904  |
| C118  | 1.334112192   | 5.549331141  | -1.668691369  |
| C119  | 2.492461034   | 4.375653008  | -3.432937018  |
| C120  | 1.696346031   | 4.539825499  | -0.769942900  |
| C121  | 2.859295499   | 3.369114805  | -2.532801565  |
| C122  | 2.476231258   | 3.459104950  | -1.191322999  |
| C123  | 10.842674515  | -2.087333243 | 1.632516932   |
| C124  | 10.943198442  | -3.335330581 | 2.523178141   |
| C125  | 9.953271354   | -2.317314192 | 0.399597926   |
| C126  | 9.644211871   | -1.090844968 | -0.403417469  |
| C127  | 10.542395713  | -0.247829922 | -1.027732278  |
| C128  | 8.475389528   | 0.386322704  | -1.506302356  |
| C129  | 11.271494985  | -5.731800176 | 2.735627878   |
| C130  | 12.327078168  | -5.573086587 | 3.807274252   |
| C131  | 4.543676204   | -3.586455676 | -4.167029692  |
| C132  | 5.054453976   | -4.109623843 | -2.854192645  |
| C133  | 6.441994609   | -3.494879337 | -2.407819124  |
| C134  | 7.515169091   | -3.785878553 | -3.493081237  |
| C135  | 8.923125023   | -3.371195811 | -3.035870684  |
| C136  | 10.017497510  | -3.840360482 | -3.948718710  |
| C137  | 6.866543053   | -4.279142351 | -1.126959546  |
| C138  | 3.630674774   | 0.051536173  | 2.160399648   |
| Fe139 | 5.426075507   | 0.629800014  | 1.408255609   |
| Fe140 | 1.481782670   | 0.235536692  | 2.325566832   |
| Fe141 | 3.474846453   | -0.502806191 | 3.984893048   |
| Fe142 | 3.808785698   | 1.825285193  | 2.986718440   |
| Fe143 | 1.708476385   | 1.724109778  | 4.577931676   |
| Fe144 | 4.627442917   | -1.703206338 | 2.106748940   |
| Fe145 | 3.656480591   | -0.506502940 | -0.085180729  |
| H146  | 0.841837926   | -1.143695330 | -8.817853258  |
| H147  | 0.849991424   | 0.477450565  | -8.579576192  |
| H148  | -3.090008283  | 0.603048904  | -9.930309995  |
| H149  | -0.812814726  | 0.853090407  | -10.214489153 |
| H150  | -0.693149182  | -0.829960859 | -10.726401507 |
| H151  | -3.943174729  | 0.016448061  | -7.319125490  |
| H152  | -3.947520934  | -2.237880359 | -10.107312989 |
| H153  | -5.002967498  | 0.204336798  | -8.732198378  |
| H154  | -4.526778003  | -4.488919378 | -10.168762082 |
| H155  | -2.185524636  | -3.498321789 | -8.625374554  |
| H156  | -5.658647808  | -4.215221008 | -8.818835465  |
| H157  | -1.741801700  | -2.848785106 | -3.549125781  |
| H158  | -2.176222560  | -2.536393411 | -6.369171375  |
| H159  | -0.463407200  | -4.582355655 | -7.477036975  |
| H160  | -6.379188626  | -3.910899420 | -3.142293051  |
| H161  | -4.798864533  | -3.283843050 | -5.479187690  |
| H162  | -1.502184993  | -5.999695361 | -7.202615616  |

|      |               |               |              |
|------|---------------|---------------|--------------|
| H163 | -2.793044521  | -1.643200444  | -4.329161509 |
| H164 | -4.677757675  | -6.090211195  | -5.507939485 |
| H165 | -6.767800126  | -4.319170587  | -4.834350416 |
| H166 | 0.156127824   | -4.297044415  | -2.425687112 |
| H167 | 0.324804048   | -2.574165437  | -2.023779974 |
| H168 | 1.098181164   | -3.791195303  | -0.995332953 |
| H169 | -1.931062545  | -3.347394338  | -1.339108549 |
| H170 | -4.492917963  | -8.382833805  | -5.469541652 |
| H171 | -4.571703667  | -2.364774325  | 0.533064871  |
| H172 | -5.565374054  | -6.572852946  | -0.774085086 |
| H173 | -7.639205808  | -5.290366984  | 1.558536480  |
| H174 | -0.895544198  | -1.656834594  | 0.109302086  |
| H175 | -0.098049385  | -2.888817211  | 1.094790115  |
| H176 | 0.629293256   | -6.363719381  | 8.095201050  |
| H177 | -6.246492384  | -1.883222242  | 0.895712954  |
| H178 | -7.981394474  | -3.546368415  | 1.497468703  |
| H179 | -5.176361967  | -2.439945239  | 2.207316890  |
| H180 | -7.010212946  | -4.215301651  | 2.830092518  |
| H181 | -6.194775184  | -4.158240322  | -0.136421583 |
| H182 | -4.492174982  | -4.863893791  | 2.314459016  |
| H183 | -3.823219848  | -4.566037323  | -0.549149978 |
| H184 | -1.873519438  | -2.740119192  | 1.109477532  |
| H185 | -2.145801117  | 1.149226870   | 3.333142801  |
| H186 | -3.826956284  | 0.556278554   | 3.158124239  |
| H187 | -3.310714892  | -0.361185818  | 5.070923666  |
| H188 | -4.354416574  | -2.860007770  | 5.288134279  |
| H189 | -1.292811142  | -1.285219180  | 6.122137361  |
| H190 | 0.805593243   | -2.549643742  | 6.455156157  |
| H191 | -1.291774137  | -6.242631897  | 5.685637302  |
| H192 | -2.279123501  | -5.715963467  | -2.076178131 |
| H193 | -0.523648558  | -8.107145221  | -3.367653030 |
| H194 | -1.580046487  | -9.078301476  | -2.318951323 |
| H195 | -2.451555263  | -6.885147916  | -4.123008872 |
| H196 | -5.713239190  | -8.450229313  | -4.171570184 |
| H197 | -3.387583911  | -4.973781569  | 5.320379286  |
| H198 | -0.405162229  | -5.480976226  | 0.208168505  |
| H199 | -7.112110774  | -8.543091603  | 0.437650013  |
| H200 | -6.065871407  | -8.781567549  | -0.989661803 |
| H201 | -4.123285881  | -9.109741614  | 0.906562583  |
| H202 | 7.823355929   | -10.707292166 | 4.150360704  |
| H203 | 4.624340516   | 0.986508437   | -5.066172993 |
| H204 | 5.414136433   | -5.086329467  | -5.012789697 |
| H205 | 7.981534656   | 4.752633858   | -5.694984857 |
| H206 | 7.968311363   | 4.599162212   | -3.936050072 |
| H207 | 5.450496261   | 4.728041869   | -5.715255236 |
| H208 | 3.247711156   | 9.275446986   | -2.346084963 |
| H209 | 6.643325990   | 6.888580170   | -5.642127104 |
| H210 | 0.573173283   | 1.920845550   | -4.004357343 |
| H211 | 1.015040126   | -0.330991223  | -6.044777304 |
| H212 | 4.327749268   | 6.933383159   | -2.874468637 |
| H213 | 2.526549195   | 8.381232623   | -4.723499233 |
| H214 | 6.384806768   | 6.833958788   | -2.697274915 |
| H215 | 3.748825802   | -0.326852152  | -4.300034444 |
| H216 | 5.435160903   | 4.627313652   | -3.955683170 |
| H217 | 7.773187749   | 6.797648006   | -3.563485062 |
| H218 | -0.476638913  | 2.937084896   | -7.355623918 |
| H219 | -0.457213569  | 0.485723056   | -3.981148572 |
| H220 | 9.283882280   | 2.925951746   | -4.902977269 |
| H221 | 1.540984328   | -0.553170414  | -4.378297969 |
| H222 | -5.698442571  | 0.130744459   | -0.363766266 |
| H223 | -2.915474881  | 0.000303982   | -0.408091750 |
| H224 | -7.175868661  | -0.259188613  | -4.807454875 |
| H225 | -4.749913068  | 1.469183842   | -5.007551615 |
| H226 | -7.449813275  | 2.719053275   | -2.055080697 |
| H227 | -12.142545757 | 4.200446000   | -0.285398120 |
| H228 | -10.156809017 | 0.996254047   | -1.490327031 |
| H229 | -9.939628879  | 3.316066174   | -2.972854931 |
| H230 | -9.192001368  | 3.507270637   | 0.009294193  |
| H231 | -11.796132294 | 7.950102340   | -2.229512484 |
| H232 | -5.370180804  | 2.251741344   | 0.884270445  |
| H233 | -5.405843163  | 3.191015646   | -0.609611354 |
| H234 | -13.132839722 | 6.540007946   | -0.571340987 |
| H235 | -8.708186424  | 4.438072170   | -2.398525881 |
| H236 | -5.429260331  | 1.833808523   | -2.772520044 |
| H237 | -5.510514365  | -0.849392563  | -4.825367725 |
| H238 | -6.826282974  | 4.233088592   | -5.668380965 |
| H239 | -0.710160974  | 3.607706690   | -0.416902122 |
| H240 | -6.110395990  | 3.480565072   | -7.105082323 |
| H241 | -0.558700484  | 1.094704614   | -0.454364914 |
| H242 | 1.499933721   | -4.792574331  | 9.644527642  |

|      |               |               |              |
|------|---------------|---------------|--------------|
| H243 | 0.829099469   | -3.850966054  | 8.488649320  |
| H244 | -1.844378568  | 3.199062561   | 4.810159925  |
| H245 | -3.943233716  | 2.870671992   | 2.809624886  |
| H246 | -4.021625650  | 3.131072185   | 6.336638911  |
| H247 | -3.366132279  | 4.904517814   | -0.272678910 |
| H248 | -3.560678335  | 6.183422468   | -2.052167983 |
| H249 | -4.590564003  | 5.924620021   | -0.137253599 |
| H250 | -5.546709027  | 8.768568633   | -3.944170661 |
| H251 | -6.667693341  | 7.330575922   | -0.196196046 |
| H252 | -1.669300672  | 5.783740756   | -3.385093665 |
| H253 | -2.704378723  | 6.104745851   | -4.802372627 |
| H254 | -5.888362324  | 7.315844970   | 7.709411934  |
| H255 | -7.465007343  | 8.143085228   | 7.618167446  |
| H256 | -4.558322046  | 7.363131998   | 5.828673046  |
| H257 | -5.200989903  | 7.715437055   | 4.236951948  |
| H258 | -3.232449750  | 10.389060482  | 3.123397259  |
| H259 | -0.459863212  | 7.763582570   | 0.859823516  |
| H260 | -8.841305112  | 7.574785762   | 0.480118959  |
| H261 | -7.928284090  | 3.622814095   | 3.366836474  |
| H262 | -4.943878106  | 7.734091011   | 1.571018383  |
| H263 | 0.028768722   | 4.801842306   | 3.852440273  |
| H264 | -0.849622711  | 4.802615402   | 6.177052549  |
| H265 | -1.202857789  | 5.330785137   | 1.727585782  |
| H266 | -4.001320564  | 3.845712409   | -6.218040779 |
| H267 | -1.204324311  | 6.639893142   | 8.827730643  |
| H268 | -1.251882432  | 4.033894437   | -5.146904624 |
| H269 | 0.232055047   | 6.527616006   | 4.181209963  |
| H270 | -6.107557970  | 4.612665614   | 2.025845025  |
| H271 | -4.292514101  | 8.083888435   | -3.369541789 |
| H272 | -2.750031997  | 5.770739547   | 8.898351654  |
| H273 | -1.658484787  | 9.952795052   | 2.553776672  |
| H274 | -5.038356532  | 9.383214380   | 2.039528773  |
| H275 | 0.917187832   | 2.639074290   | -6.487921124 |
| H276 | -1.078992434  | 0.899885601   | -6.371375062 |
| H277 | -10.648441029 | 6.654179827   | 1.913880237  |
| H278 | -2.907637493  | 3.731658134   | -2.856328182 |
| H279 | -2.222440749  | 6.815739895   | 4.460068228  |
| H280 | -0.609045760  | 8.202496421   | 2.568290022  |
| H281 | 0.459306237   | 5.886354008   | 1.807251537  |
| H282 | -2.863234066  | 6.929432437   | 1.012132045  |
| H283 | -6.618111604  | 1.812489058   | 6.387081242  |
| H284 | -6.035543532  | 5.057912983   | 6.181856052  |
| H285 | -7.699666685  | 5.852961331   | 8.440560365  |
| H286 | -5.509133345  | 2.110457930   | 7.745883634  |
| H287 | -8.499262488  | 4.903288056   | 5.240930560  |
| H288 | 9.421962029   | 4.097638161   | 1.448096508  |
| H289 | 9.966664526   | 3.002666713   | 0.166360888  |
| H290 | 10.376140391  | -1.319046180  | 2.266901587  |
| H291 | 11.765210474  | 4.466418790   | 0.556199203  |
| H292 | 11.048543274  | 5.099616954   | -0.778310461 |
| H293 | 0.232797715   | 0.675510013   | 7.318570463  |
| H294 | -2.271090290  | 0.933059820   | 9.116797497  |
| H295 | -0.060211035  | 4.617888879   | 8.696848971  |
| H296 | -1.411272429  | 1.117443751   | 6.759732623  |
| H297 | -1.445028592  | 1.562930865   | 10.377853188 |
| H298 | 4.581458090   | 4.788755112   | 5.587928049  |
| H299 | 0.217159358   | 2.481150629   | 8.975842697  |
| H300 | 3.873014629   | -9.098404735  | -0.037412310 |
| H301 | 6.821338410   | -8.463476579  | 0.514038509  |
| H302 | 5.029466168   | 4.807053744   | 3.279699744  |
| H303 | 0.557516704   | -4.141596276  | 3.738772802  |
| H304 | 4.104867356   | 7.353344838   | 0.949080741  |
| H305 | 3.451507110   | 2.515406421   | -2.870119292 |
| H306 | 2.877633423   | 6.123893826   | 1.267318763  |
| H307 | 2.321980995   | -6.995194102  | 0.565416924  |
| H308 | 4.924179011   | 4.466890578   | 1.270995529  |
| H309 | 3.598007981   | -5.880749491  | 0.081597763  |
| H310 | 4.840460434   | -7.772467456  | -0.720382848 |
| H311 | 5.169636640   | -6.912670579  | 1.708584418  |
| H312 | 3.927882348   | -8.082679775  | 2.204716763  |
| H313 | 1.535634750   | 6.282757359   | -4.996149987 |
| H314 | 5.586905441   | -10.687424766 | -1.076440117 |
| H315 | 7.406088504   | -10.417253373 | -3.535328828 |
| H316 | 2.780835818   | 2.693337093   | -0.478447840 |
| H317 | 6.556703194   | -12.803535990 | -2.087717818 |
| H318 | 6.080310939   | -12.246619392 | -3.552731381 |
| H319 | 3.534857507   | -4.799076591  | 2.189168173  |
| H320 | 1.384889155   | 4.577991624   | 0.276351154  |
| H321 | 2.793046664   | 4.297380298   | -4.480578852 |
| H322 | 10.749620421  | -6.420087041  | -0.743017267 |

|       |               |               |              |
|-------|---------------|---------------|--------------|
| H323  | 10.447989788  | -3.052484334  | -0.260500157 |
| H324  | 8.358295747   | -6.314802181  | -0.374959185 |
| H325  | 11.419639562  | -5.590873110  | -1.865218291 |
| H326  | 6.772780892   | 6.699879989   | 4.908961999  |
| H327  | 6.710692925   | -4.471691494  | 1.532804130  |
| H328  | 5.150929478   | -5.205743561  | -2.878910742 |
| H329  | 7.257713494   | 3.713092073   | 0.799049981  |
| H330  | 7.508150099   | -4.865977944  | -3.711751823 |
| H331  | 10.139176907  | 1.424903638   | -2.300846224 |
| H332  | 7.654363177   | 0.952599981   | -1.930929104 |
| H333  | 8.437301142   | -11.507584195 | -2.602933765 |
| H334  | 2.133185705   | -3.526557075  | 3.309498957  |
| H335  | 7.567129325   | -6.440537086  | 2.657354547  |
| H336  | 6.214683146   | -4.235537548  | 2.986985390  |
| H337  | 7.216111476   | -8.804801863  | 2.631962520  |
| H338  | 0.830559273   | -7.099981492  | 1.817172154  |
| H339  | 10.644337226  | -3.723531344  | -5.729955966 |
| H340  | 8.965296880   | -2.274265639  | -2.960614764 |
| H341  | 9.141999252   | -3.785584009  | -2.045383640 |
| H342  | 7.248543055   | -3.238585584  | -4.408400890 |
| H343  | 5.604342985   | 3.466992138   | -0.870298550 |
| H344  | 0.740836886   | 6.402774791   | -1.328763618 |
| H345  | 0.534832873   | 7.111722370   | -3.781389011 |
| H346  | 4.333803126   | -3.824996938  | -2.076359894 |
| H347  | 8.561238692   | -7.145029761  | 1.700086855  |
| H348  | 8.862426390   | -7.789252239  | -0.432589539 |
| H349  | -0.344405999  | -5.973447068  | 2.381346444  |
| H350  | 11.626098437  | -0.237938248  | -1.029580520 |
| H351  | 9.007155185   | -2.772951245  | 0.718087330  |
| H352  | 6.496778100   | 4.612025845   | -1.918874702 |
| H353  | 3.929559318   | 6.441351702   | 5.485272886  |
| H354  | 1.199891347   | -6.169872422  | 5.712443244  |
| H355  | 2.057497746   | -4.638571128  | 6.000464985  |
| H356  | 12.715700142  | -1.399560147  | 2.110066552  |
| H357  | 12.699221126  | -2.348688007  | 0.778444194  |
| H358  | 11.598516319  | -6.553572788  | 2.079049718  |
| H359  | 11.173418506  | -4.647186840  | 0.902913007  |
| H360  | 13.148264811  | -4.858360914  | 3.557364666  |
| H361  | 10.315657592  | -6.033304165  | 3.192946900  |
| H362  | 3.659515794   | -5.835225852  | 7.834796084  |
| H363  | -11.404839097 | 4.277942460   | 6.705861902  |
| H364  | 6.264823169   | -11.454784081 | 3.705053936  |
| H365  | 5.260090293   | -9.152586441  | 4.839144168  |
| H366  | -10.748723209 | 6.503581067   | 4.735181291  |
| H367  | -10.326701907 | 3.544879969   | 3.981376252  |
| H368  | -11.490324470 | 4.661172920   | 3.238025709  |
| H369  | 1.020879005   | -0.965072398  | -0.336932633 |
| H370  | 1.405913539   | -1.253924953  | 2.062324326  |
| H371  | 3.419825539   | -0.760103499  | -1.559490080 |
| H372  | -0.131308706  | 0.643253286   | 2.271729975  |
| H373  | -0.098848652  | -0.191640079  | 2.266840750  |
| Mo374 | 6.131885060   | -1.486086814  | -0.176636250 |
| N375  | 0.714444024   | -0.245133011  | -9.291026312 |
| N376  | -3.003539705  | -0.111625414  | -9.212107868 |
| N377  | -4.338682334  | -2.629386463  | -9.253753799 |
| N378  | -2.419726371  | -4.374705965  | -8.162174045 |
| N379  | -2.186510328  | -3.189786426  | -5.582545730 |
| N380  | -4.816296229  | -3.668353936  | -4.530906023 |
| N381  | -4.978812851  | -6.540562368  | -4.640463364 |
| N382  | -2.570093111  | -7.647792903  | -3.448805934 |
| N383  | -1.593176432  | -5.998811841  | -1.376580019 |
| N384  | -3.674579028  | -4.895639729  | 0.407970179  |
| N385  | -5.581981342  | -7.094045447  | 0.105008691  |
| N386  | 6.312935180   | -11.954936809 | -2.602643805 |
| N387  | 6.276203615   | -9.992056279  | -0.770728783 |
| N388  | 2.855803654   | -5.541550546  | 1.992312627  |
| N389  | 0.647942553   | -6.269036870  | 2.372930827  |
| N390  | 1.350275691   | -4.176913945  | 3.100793359  |
| N391  | 6.678328537   | -9.697524921  | 2.686163813  |
| N392  | -0.096762608  | 2.830975636   | -6.411964135 |
| N393  | 3.740983210   | 0.503949622   | -4.891645833 |
| N394  | -2.076767234  | 3.537324437   | -4.779729691 |
| N395  | -4.767886530  | 3.801655887   | -5.551059330 |
| N396  | -5.746947365  | 1.222361983   | -5.065428218 |
| N397  | -5.730877411  | 1.001204248   | -2.259863708 |
| N398  | -2.849774810  | 3.317276512   | -0.315592508 |
| N399  | -1.464722785  | 1.600148270   | -0.435355563 |
| N400  | -7.978398625  | 2.340399213   | -1.272019772 |
| N401  | -10.540568576 | 6.206922158   | -2.407901523 |
| N402  | -12.309882207 | 6.210243834   | -1.068396564 |

|      |               |               |              |
|------|---------------|---------------|--------------|
| N403 | 1.594513445   | -4.507407020  | 8.666594437  |
| N404 | -1.325334604  | 1.150565324   | 9.447654559  |
| N405 | -1.062941595  | 4.586833307   | 8.532977054  |
| N406 | -1.471135807  | 5.594964347   | 5.942759934  |
| N407 | -2.400951435  | 7.633471375   | 1.623035346  |
| N408 | -2.619468300  | 9.681814839   | 2.731457113  |
| N409 | -4.509821767  | 8.514796819   | 2.069416116  |
| N410 | -2.701988165  | 3.535737070   | 4.335208414  |
| N411 | -4.947517957  | 2.974648239   | 5.927240067  |
| N412 | -6.803077590  | 4.897608798   | 6.835091653  |
| N413 | -5.369228167  | 7.563213590   | 5.230932694  |
| N414 | -9.284448581  | 5.345554458   | 5.712874059  |
| N415 | 10.925587973  | 4.948117865   | 0.228016711  |
| N416 | 7.391797928   | 4.208138377   | -0.092266640 |
| N417 | 4.808642077   | 5.405408874   | 0.834982227  |
| N418 | 4.708864146   | 5.690227130   | 3.698251135  |
| N419 | 6.807798745   | 7.134286819   | -3.584392513 |
| N420 | 3.957490454   | 7.270555229   | -3.770595686 |
| N421 | 12.186044768  | -1.601464502  | 1.257164426  |
| N422 | 8.350024858   | -0.673373809  | -0.710435516 |
| N423 | 9.784158463   | 0.674243582   | -1.715865375 |
| N424 | 11.146865093  | -4.537937967  | 1.917266664  |
| O425 | -1.585055121  | -1.382450703  | -7.965847258 |
| O426 | -5.048584030  | -2.227370162  | -7.128496130 |
| O427 | -4.122975410  | -5.766991968  | -7.532239678 |
| O428 | -1.621100888  | -5.253346722  | -4.803046281 |
| O429 | -3.807434222  | -3.863353644  | -2.507581078 |
| O430 | -6.197493347  | -6.390591557  | -2.719022067 |
| O431 | -3.871794643  | -9.424399625  | -2.794175530 |
| O432 | -0.120898060  | -7.635213362  | -0.720015361 |
| O433 | -2.152293711  | -5.597427443  | 1.964007262  |
| O434 | -5.485372532  | -7.124892584  | 2.372974967  |
| O435 | -5.591119709  | -10.469775666 | 1.302763035  |
| O436 | 8.442686268   | -9.323949053  | -1.237231224 |
| O437 | 5.242876349   | -11.135832741 | 1.611750704  |
| O438 | 6.406933495   | -10.088071611 | 6.242661143  |
| O439 | -2.897452995  | 1.398455204   | -4.610136165 |
| O440 | 2.624478812   | 1.936902225   | -6.260075645 |
| O441 | -5.358187214  | 3.830628431   | -3.350541177 |
| O442 | -3.632434031  | 6.416421244   | -3.022736058 |
| O443 | -7.874576421  | 1.905069513   | -5.603010280 |
| O444 | -6.618831355  | -1.106176477  | -2.377364260 |
| O445 | -7.965175732  | 0.931376588   | 0.520518273  |
| O446 | -11.272665066 | 1.914838529   | -0.049931865 |
| O447 | 2.806676640   | -7.691039972  | 7.821505119  |
| O448 | -3.601265076  | -2.282766314  | 5.510041802  |
| O449 | -2.863745187  | 3.262078649   | 8.084549811  |
| O450 | -2.937672955  | 7.169942352   | 6.756179954  |
| O451 | -3.760656163  | 5.269705597   | 3.286587481  |
| O452 | -6.035873432  | 2.137896042   | 4.086552871  |
| O453 | -3.093041161  | 0.591109089   | 5.116126533  |
| O454 | -7.746272541  | 3.386574051   | 8.269715632  |
| O455 | -9.882439687  | 6.770565763   | 7.389404381  |
| O456 | -7.586255151  | 8.042632919   | 4.967942063  |
| O457 | -12.860616942 | 5.294615260   | 5.694785118  |
| O458 | -6.312659927  | 6.681074156   | 0.439863877  |
| O459 | 8.884732122   | 5.013262884   | -1.641348919 |
| O460 | 5.117870656   | 6.576211475   | -1.110773625 |
| O461 | 3.522966233   | 7.629281109   | 3.435621295  |
| O462 | 6.301869827   | 6.413975192   | 6.875677586  |
| O463 | 4.268559545   | 7.479262107   | -6.023503789 |
| O464 | 6.362877137   | 2.162752883   | -5.092010741 |
| O465 | 8.586270400   | 2.245287934   | -4.973316963 |
| O466 | 1.245241941   | 8.942164134   | -2.177155175 |
| O467 | 10.925748566  | -3.248016421  | 3.765604230  |
| O468 | 12.348318227  | -6.227157560  | 4.840577771  |
| O469 | 3.860072229   | -2.586750590  | -4.326465645 |
| O470 | 4.886383764   | -4.311651333  | -5.285703099 |
| O471 | 10.949823554  | -4.576343746  | -3.630149465 |
| O472 | 9.891772369   | -3.362152083  | -5.214680824 |
| O473 | 7.004433119   | -3.567427405  | -0.059631118 |
| O474 | 7.092895183   | -5.511713224  | -1.194907799 |
| O475 | 6.331826612   | -2.142483498  | -2.161265204 |
| O476 | 8.133567693   | -7.250988463  | 2.590736009  |
| O477 | 6.510354868   | -4.943645082  | 2.380646020  |
| O478 | -3.630580621  | 5.895833968   | -0.337770697 |
| O479 | -4.696206793  | 8.972232640   | -3.519021267 |
| O480 | 11.631882032  | -6.083747713  | -1.045122830 |
| O481 | 9.082758189   | -6.912191661  | -0.024407238 |
| S482 | 0.246884973   | 2.692685382   | 5.948119588  |



|                   |                                |               |               |              |
|-------------------|--------------------------------|---------------|---------------|--------------|
|                   | S483                           | 1.726938139   | 2.633861225   | 2.544420476  |
|                   | S484                           | 5.340202018   | 0.672968951   | -0.848302448 |
|                   | S485                           | 1.338189456   | -0.425400704  | 4.460615343  |
|                   | S486                           | 1.494403640   | 0.262797683   | -0.000167271 |
|                   | S487                           | 5.754362917   | 2.663961538   | 2.310898881  |
|                   | S488                           | 4.047572462   | -2.665335838  | 0.175712376  |
|                   | S489                           | 3.833282531   | 1.386700410   | 5.190802765  |
|                   | S490                           | 6.765262209   | -1.062507819  | 2.079381582  |
|                   | S491                           | 4.134564350   | -2.625158238  | 4.076219282  |
| <b>15 (S=1/2)</b> | <b>bm1s2b266h2xconex.car_4</b> |               |               |              |
| Fe(139) 2.439     | C1                             | -7.914146286  | -4.869973663  | -3.414741763 |
| Fe(140) -0.979    | C2                             | -7.959445991  | -3.665498755  | -2.468934089 |
| Fe(141) 2.770     | C3                             | -8.899918844  | -1.431677714  | -2.042182454 |
| Fe(142) -2.411    | C4                             | -9.316505345  | -1.604992563  | -0.583555904 |
| Fe(143) 3.089     | C5                             | -10.586976071 | -2.868223828  | 1.073895594  |
| Fe(144) -2.354    | C6                             | -9.449570125  | -3.372985454  | 1.969830373  |
| Fe(145) -0.029    | C7                             | -7.301740884  | -4.543659947  | 2.068223903  |
|                   | C8                             | -6.336190549  | -3.386571719  | 2.341521084  |
|                   | C9                             | -5.332326016  | -1.318433315  | 1.524418294  |
|                   | C10                            | -5.863873659  | -0.387523689  | 2.623992682  |
|                   | C11                            | -7.781268628  | 0.693905275   | 3.643984000  |
|                   | C12                            | -7.782500620  | 0.121154278   | 5.067510448  |
|                   | C13                            | -8.362725006  | -1.776588136  | 6.501295863  |
|                   | C14                            | -7.135806471  | -2.417011434  | 7.161422758  |
|                   | C15                            | -5.054330326  | -3.681726263  | 6.827125800  |
|                   | C16                            | -3.680542443  | -3.026960742  | 6.665011560  |
|                   | C17                            | -2.387745726  | -1.237144581  | 5.539807977  |
|                   | C18                            | -2.340446080  | 0.168525348   | 6.167306444  |
|                   | C19                            | -2.128094646  | -1.241838044  | 4.005742505  |
|                   | C20                            | -0.909680583  | -0.399943185  | 3.614612186  |
|                   | C21                            | -1.982465876  | -2.678122755  | 3.489297194  |
|                   | C22                            | -3.433749795  | 2.372968658   | 6.359411495  |
|                   | C23                            | -4.106602302  | 2.372356087   | 7.748788755  |
|                   | C24                            | -4.122807477  | 3.332792352   | 5.359854732  |
|                   | C25                            | -4.348690855  | 4.715251540   | 5.981340647  |
|                   | C26                            | -3.301851318  | 3.449214833   | 4.069751922  |
|                   | C27                            | -6.018963359  | 1.783036990   | 9.123200408  |
|                   | C28                            | -5.194347788  | 1.185367005   | 10.244650114 |
|                   | C29                            | 0.834888871   | -11.423806218 | 7.071224245  |
|                   | C30                            | 1.902322161   | -10.422377176 | 6.625175239  |
|                   | C31                            | 2.643246380   | -8.056757882  | 6.925028812  |
|                   | C32                            | 3.460624175   | -7.804305203  | 8.206977692  |
|                   | C33                            | 1.820655241   | -6.814918264  | 6.539758279  |
|                   | C34                            | 2.685607174   | -5.604693102  | 6.189489011  |
|                   | C35                            | 1.834543963   | -4.413050788  | 5.761364263  |
|                   | C36                            | 2.343817707   | -2.011836571  | 5.293341883  |
|                   | C37                            | 5.684008101   | -7.373448708  | 9.130664165  |
|                   | C38                            | 6.181040524   | -5.945094059  | 9.203148016  |
|                   | C39                            | -4.569922448  | -1.687730388  | -3.526681367 |
|                   | C40                            | -4.704654840  | -0.161568370  | -3.457340417 |
|                   | C41                            | -3.348944793  | -2.097092450  | -2.671585880 |
|                   | C42                            | -3.372382241  | -3.519017675  | -2.075241433 |
|                   | C43                            | -2.972039274  | -4.653232900  | -3.009356108 |
|                   | C44                            | -4.115877445  | 1.944693541   | -4.625705607 |
|                   | C45                            | -5.379750174  | 2.738125909   | -4.295938983 |
|                   | C46                            | -3.555143679  | 2.316730500   | -6.024198557 |
|                   | C47                            | -7.828654128  | 2.814533522   | -4.337479631 |
|                   | C48                            | -8.136836719  | 2.942874762   | -2.839851717 |
|                   | C49                            | -7.482959533  | 2.317110982   | -0.553920213 |
|                   | C50                            | -6.346074906  | 3.069837095   | 0.143742435  |
|                   | C51                            | -4.266764557  | 4.352997338   | -0.049483085 |
|                   | C52                            | -4.740010454  | 5.780636895   | 0.276629449  |
|                   | C53                            | -3.082438791  | 4.529923018   | -1.012481008 |
|                   | C54                            | -2.309256858  | 3.304058619   | -1.377484620 |
|                   | C55                            | -2.186598882  | 2.080322871   | -0.754117056 |
|                   | C56                            | -0.924166698  | 2.125451982   | -2.570121488 |
|                   | C57                            | -5.880692808  | 7.729215607   | -0.690172796 |
|                   | C58                            | -6.402421836  | 8.180229642   | 0.671724800  |
|                   | C59                            | -6.946524978  | 7.946273304   | -1.788034309 |
|                   | C60                            | -7.139850138  | 9.350079548   | -2.278438774 |
|                   | C61                            | -6.984732116  | 10.565760831  | -1.641105137 |
|                   | C62                            | -7.642455339  | 10.870380631  | -3.734761371 |
|                   | C63                            | 6.485573969   | 0.452492363   | 7.444057047  |
|                   | C64                            | 7.188735891   | -0.854979037  | 7.753782584  |
|                   | C65                            | 5.334604387   | 0.116452570   | 6.457640232  |
|                   | C66                            | 4.517115053   | 1.324544642   | 6.069571080  |
|                   | C67                            | 3.427354175   | 1.750063267   | 6.850293108  |
|                   | C68                            | 4.821276135   | 2.057728939   | 4.908669156  |
|                   | C69                            | 2.660443463   | 2.861730980   | 6.485826273  |

|       |              |               |              |
|-------|--------------|---------------|--------------|
| C70   | 4.073373962  | 3.175160085   | 4.538960505  |
| C71   | 2.989514758  | 3.574274963   | 5.325544035  |
| C72   | 6.791235015  | 5.893395447   | 1.118564931  |
| C73   | 6.254281994  | 7.013662007   | 0.220173132  |
| C74   | 5.725706287  | 4.802431756   | 1.293384708  |
| C75   | 6.419259574  | 8.119079785   | -1.971281862 |
| C76   | 5.117506218  | 7.804263226   | -2.711788114 |
| C77   | 3.359274765  | 6.125613592   | -3.154735513 |
| C78   | 2.182931516  | 6.376066586   | -2.184140681 |
| C79   | 3.469754412  | 4.656313686   | -3.604329955 |
| C80   | 2.243028824  | 4.032929323   | -4.278019980 |
| C81   | 1.919781990  | 4.524889086   | -5.699176313 |
| C82   | 1.163020185  | 6.858371145   | -6.199499682 |
| C83   | 1.301419818  | 6.252917255   | 0.086653343  |
| C84   | 1.225051101  | 7.691621628   | 0.633831042  |
| C85   | 1.380536227  | 5.289213951   | 1.278406083  |
| C86   | 2.520644783  | 9.611302277   | 1.418971402  |
| C87   | 2.344677213  | 10.970804162  | 0.748998179  |
| C88   | 1.939200074  | 12.224640566  | -1.326827934 |
| C89   | 0.569471070  | 12.933411394  | -1.263577873 |
| C90   | 2.390419957  | 12.025741617  | -2.789403552 |
| C91   | 1.467097775  | 11.080594444  | -3.551337231 |
| C92   | -1.836307408 | 12.703999378  | -0.874578452 |
| C93   | -2.032357623 | 13.849590792  | 0.110359611  |
| C94   | -2.851544406 | 11.571429554  | -0.563630199 |
| C95   | -2.786610053 | 10.451050855  | -1.576260849 |
| C96   | -3.469513974 | 10.555495168  | -2.798064741 |
| C97   | -2.003835380 | 9.306848809   | -1.347717225 |
| C98   | -3.362853442 | 9.562573126   | -3.773529349 |
| C99   | -1.868223587 | 8.313486359   | -2.321226813 |
| C100  | -2.550589544 | 8.453189262   | -3.528850112 |
| C101  | 7.052357099  | -5.504500908  | -5.893251955 |
| C102  | 5.676612864  | -4.973839873  | -6.257115881 |
| C103  | 3.984220236  | -3.228958898  | -5.788912800 |
| C104  | 3.998409505  | -1.883741902  | -6.526294390 |
| C105  | 4.595167866  | 0.484858337   | -6.344659577 |
| C106  | 5.842517987  | 1.290780394   | -5.988825049 |
| C107  | 7.777794207  | 1.604665869   | -4.524073485 |
| C108  | 9.082396866  | 1.204576320   | -5.185354815 |
| C109  | 1.348026170  | -4.311485550  | -9.272011349 |
| C110  | 0.386873173  | -3.121068852  | -9.400610284 |
| C111  | 1.109093676  | -5.073364158  | -7.946155724 |
| C112  | 1.740900439  | -6.477723926  | -8.017242739 |
| C113  | 1.783551609  | -7.162958541  | -6.668198241 |
| C114  | 0.027239241  | -0.709466143  | -9.159285590 |
| C115  | 0.904268263  | 0.480006224   | -9.505786675 |
| C116  | -0.954480039 | -0.464070569  | -7.984061744 |
| C117  | -0.306752779 | -0.714329780  | -6.648510247 |
| C118  | 0.521814104  | 0.246107371   | -6.043042433 |
| C119  | -0.421345666 | -1.978443369  | -6.049136136 |
| C120  | 1.257963346  | -0.074840986  | -4.899676454 |
| C121  | 0.315947133  | -2.301132867  | -4.906240231 |
| C122  | 1.176053175  | -1.355192366  | -4.343590529 |
| C123  | 7.464807281  | -8.090946437  | -0.225456205 |
| C124  | 8.085759107  | -8.273359307  | 1.167341436  |
| C125  | 5.934945599  | -8.238650136  | -0.204115600 |
| C126  | 5.221324044  | -7.862276009  | -1.466200976 |
| C127  | 5.256429584  | -8.526582609  | -2.677136061 |
| C128  | 3.791448833  | -6.874596384  | -2.787343324 |
| C129  | 8.173792017  | -9.472931661  | 3.278664572  |
| C130  | 9.683366727  | -9.574296724  | 3.262223209  |
| C131  | -0.909681431 | -6.479886714  | 1.055929595  |
| C132  | 0.368485395  | -6.570869773  | 1.833409275  |
| C133  | 1.554007601  | -7.183525688  | 0.969528432  |
| C134  | 1.196078213  | -8.643761476  | 0.569153263  |
| C135  | 2.369218781  | -9.362374166  | -0.116211607 |
| C136  | 2.168097305  | -10.843033458 | -0.272535978 |
| C137  | 2.781155930  | -7.269313204  | 1.927366405  |
| C138  | 3.976952724  | -1.585452237  | -0.233345046 |
| Fe139 | 4.560109437  | -2.993289726  | -1.463691477 |
| Fe140 | 2.636590974  | -0.253480106  | -0.218911451 |
| Fe141 | 4.833312150  | -0.382986893  | 1.134038545  |
| Fe142 | 4.908903207  | -0.403135530  | -1.483467449 |
| Fe143 | 4.503371132  | 1.907097468   | -0.217903944 |
| Fe144 | 4.682819290  | -2.949005446  | 1.093975835  |
| Fe145 | 2.084226208  | -2.736478362  | -0.060614276 |
| H146  | -6.494527641 | -5.904396190  | -2.380142741 |
| H147  | -5.904397713 | -5.167369332  | -3.719342846 |
| H148  | -9.278953264 | -2.704939548  | -3.715689892 |
| H149  | -8.079159242 | -4.534142948  | -4.449856545 |

|      |               |              |               |
|------|---------------|--------------|---------------|
| H150 | -8.787403958  | -5.493598495 | -3.152420747  |
| H151 | -7.928297544  | -0.916331458 | -2.027650991  |
| H152 | -10.527509025 | -3.197469334 | -1.054193155  |
| H153 | -9.629997316  | -0.773249833 | -2.532854455  |
| H154 | -11.390808834 | -3.615695835 | 1.065073494   |
| H155 | -8.495920227  | -4.182698585 | 0.341089162   |
| H156 | -10.973517463 | -1.951951802 | 1.539375389   |
| H157 | -4.309319779  | -1.597391629 | 1.806650195   |
| H158 | -6.585004802  | -2.676784275 | 0.417035646   |
| H159 | -6.792723696  | -5.311469704 | 1.468764292   |
| H160 | -7.228162397  | 1.641978830  | 3.670890427   |
| H161 | -7.793501571  | -0.569855214 | 1.901953623   |
| H162 | -7.568186980  | -4.979999604 | 3.038484570   |
| H163 | -5.290691321  | -0.770926685 | 0.571908636   |
| H164 | -8.478813838  | -1.696315115 | 4.367849075   |
| H165 | -8.820705267  | 0.904844514  | 3.353523474   |
| H166 | -2.876198966  | -3.283005914 | 3.697016804   |
| H167 | -1.817171099  | -2.676783699 | 2.401004961   |
| H168 | -1.112293226  | -3.170637026 | 3.951927033   |
| H169 | -3.015736320  | -0.787053187 | 3.536598163   |
| H170 | -9.131745297  | -2.556543188 | 6.410396749   |
| H171 | -3.144321010  | 2.472579369  | 3.590364480   |
| H172 | -5.814134291  | 1.392542886  | 7.037831892   |
| H173 | -5.012142784  | 4.676031221  | 6.857835600   |
| H174 | -0.827323051  | -0.348269981 | 2.518677797   |
| H175 | 0.022800051   | -0.847949645 | 3.984019791   |
| H176 | 6.033808054   | 0.821273320  | 8.384985912   |
| H177 | -3.823772429  | 4.097003300  | 3.350365174   |
| H178 | -4.807536097  | 5.384820783  | 5.239077230   |
| H179 | -2.314851271  | 3.895390531  | 4.276661275   |
| H180 | -3.393687172  | 5.163169163  | 6.298708511   |
| H181 | -5.108647916  | 2.902398404  | 5.104924103   |
| H182 | -2.410478209  | 2.727264441  | 6.550367361   |
| H183 | -4.005440288  | 0.745336322  | 5.083796195   |
| H184 | -0.973968683  | 0.631988014  | 3.989443715   |
| H185 | 1.556510427   | 4.266494825  | 0.900480815   |
| H186 | 0.401828561   | 5.317975454  | 1.785874809   |
| H187 | 2.297414175   | 5.249168284  | 3.017814340   |
| H188 | 1.518954218   | 4.827232356  | 5.503395143   |
| H189 | 4.301766289   | 3.715296213  | 3.620750091   |
| H190 | 5.634106794   | 1.725557043  | 4.258952293   |
| H191 | 3.162392820   | 1.200088447  | 7.757124274   |
| H192 | -4.488951445  | -1.638034391 | 5.402210723   |
| H193 | -5.000099242  | -4.660732478 | 6.325738445   |
| H194 | -5.206006792  | -3.861613949 | 7.898673593   |
| H195 | -6.371962097  | -2.973769627 | 5.314279563   |
| H196 | -8.725603702  | -1.014735852 | 7.202110567   |
| H197 | 1.807031022   | 3.169765968  | 7.096775359   |
| H198 | -1.591050660  | -1.802098871 | 6.041555772   |
| H199 | -6.332313232  | 2.800083348  | 9.412153215   |
| H200 | -6.924987666  | 1.165823216  | 9.016031954   |
| H201 | -4.410358043  | 0.462525906  | 9.918473985   |
| H202 | 6.545617783   | -8.057399006 | 9.111125113   |
| H203 | -1.857860527  | -6.362441190 | -3.057276654  |
| H204 | -1.372371418  | -8.231134804 | 1.715672931   |
| H205 | 1.141873433   | -7.104934235 | -8.693220602  |
| H206 | 2.759469554   | -6.405250673 | -8.425319028  |
| H207 | 0.028813685   | -5.171459345 | -7.760309460  |
| H208 | 1.802153699   | 0.219676501  | -10.115088425 |
| H209 | 1.010850043   | -4.981359205 | -10.080379489 |
| H210 | -2.432866867  | -1.937733471 | -3.263806102  |
| H211 | -4.390476092  | -3.746479977 | -1.714344821  |
| H212 | 1.775177194   | -1.817905186 | -8.586505867  |
| H213 | -0.587236313  | -0.864513302 | -10.069420302 |
| H214 | 3.158597293   | -3.393453051 | -8.823419332  |
| H215 | -1.796499016  | -5.522373355 | -1.515906588  |
| H216 | 1.525708325   | -4.493339452 | -7.109314901  |
| H217 | 3.298495296   | -4.785272320 | -9.688637967  |
| H218 | -5.360156723  | -2.207478538 | -5.351601535  |
| H219 | -3.301211566  | -1.404447373 | -1.818226884  |
| H220 | 3.623176030   | -6.479111299 | -6.461418689  |
| H221 | -2.719537656  | -3.534233942 | -1.190561218  |
| H222 | -3.945902126  | 3.902791386  | 0.899573608   |
| H223 | -2.638905910  | 1.670178882  | 0.142882720   |
| H224 | -8.409563037  | 2.859473139  | -0.322182599  |
| H225 | -6.639289331  | 1.583638430  | -2.362216335  |
| H226 | -5.903101705  | 5.718509561  | -1.412925372  |
| H227 | -6.672817949  | 10.825562710 | -0.636270087  |
| H228 | -7.036740585  | 7.419511562  | 1.185772721   |
| H229 | -7.905161596  | 7.515926846  | -1.446812239  |

|      |              |              |              |
|------|--------------|--------------|--------------|
| H230 | -4.970961787 | 8.306488699  | -0.925622936 |
| H231 | -7.937892574 | 11.395808097 | -4.639833430 |
| H232 | -2.405098474 | 5.265751244  | -0.547216511 |
| H233 | -3.446984441 | 4.992830898  | -1.943547856 |
| H234 | -7.288739089 | 12.526267898 | -2.442609673 |
| H235 | -6.639189060 | 7.347865985  | -2.661130765 |
| H236 | -5.335932867 | 3.389642107  | -1.645024177 |
| H237 | -7.563569095 | 1.324195324  | -0.087534773 |
| H238 | -7.870136804 | 3.833690227  | -4.746343709 |
| H239 | -0.227436640 | 1.783809184  | -3.328480831 |
| H240 | -8.634328820 | 2.235806128  | -4.808399477 |
| H241 | -0.911879282 | 0.424986058  | -1.347722604 |
| H242 | 8.053850624  | 1.769093474  | 7.549978453  |
| H243 | 6.944556797  | 2.160300878  | 6.412079258  |
| H244 | 3.208152176  | 5.484988090  | -0.599119687 |
| H245 | 0.345204079  | 6.078013867  | -0.427114609 |
| H246 | 3.245721864  | 7.939213676  | 0.353486622  |
| H247 | -1.532276826 | 4.379795247  | -3.784112092 |
| H248 | -2.753594040 | 4.089141390  | -5.620649836 |
| H249 | -2.009246285 | 5.797093623  | -4.363355217 |
| H250 | -3.041687092 | 7.586155861  | -5.202010636 |
| H251 | -2.588211775 | 1.789956885  | -6.137768889 |
| H252 | -4.241561226 | 1.925590787  | -6.792456916 |
| H253 | 3.431136887  | 11.670191540 | -2.786931226 |
| H254 | 2.358608375  | 13.006621488 | -3.282106144 |
| H255 | 2.871560469  | 9.503439652  | -3.470654491 |
| H256 | 1.287622545  | 9.117014963  | -4.099418612 |
| H257 | 2.394370391  | 8.129280899  | -7.232600086 |
| H258 | 1.469936354  | 3.709855455  | -6.285558330 |
| H259 | -3.907122481 | 9.652117103  | -4.716986485 |
| H260 | -1.487294806 | 9.166587709  | -0.393675682 |
| H261 | -0.578031648 | 7.624548473  | -5.406901383 |
| H262 | 3.717021034  | 4.035293179  | -2.728986720 |
| H263 | 5.094106730  | 5.894444805  | -1.932992634 |
| H264 | 1.351138512  | 4.135548534  | -3.639655318 |
| H265 | -6.552705130 | 1.271626906  | -5.115714529 |
| H266 | 7.211042743  | 8.249113691  | -2.721106260 |
| H267 | -3.935914782 | -0.125506565 | -5.302166656 |
| H268 | 4.333337128  | 4.589441219  | -4.287929708 |
| H269 | -1.208048248 | 7.461021329  | -2.156726314 |
| H270 | 6.264888258  | 9.087122179  | -1.474695846 |
| H271 | 2.827060012  | 6.457612906  | -7.347336909 |
| H272 | 0.199818893  | 8.614789111  | -6.585928674 |
| H273 | -4.044282726 | -3.096040219 | -4.899829246 |
| H274 | -5.473312771 | -2.072015124 | -3.016240967 |
| H275 | -4.100841109 | 11.425411309 | -2.992462782 |
| H276 | -3.388068155 | 2.250961619  | -3.859515448 |
| H277 | 3.162953138  | 6.778333432  | -4.014755189 |
| H278 | 2.844628909  | 4.812720521  | -6.215463058 |
| H279 | 2.441269286  | 2.951996868  | -4.334225471 |
| H280 | 0.042047106  | 5.439636602  | -5.267617764 |
| H281 | 1.789129527  | 9.573581099  | 2.239627143  |
| H282 | 1.989080532  | 10.079714185 | -1.066013192 |
| H283 | 2.638389646  | 12.925588755 | -0.848127380 |
| H284 | 3.524577783  | 9.607875937  | 1.865056325  |
| H285 | -0.315849194 | 11.214062575 | -0.605798262 |
| H286 | 7.733898198  | -4.669578942 | -5.673159958 |
| H287 | 6.909463887  | -6.058545033 | -4.941485855 |
| H288 | 7.714443025  | -7.061705148 | -0.521249133 |
| H289 | 8.379499345  | -6.866489226 | -6.627386582 |
| H290 | 6.877287686  | -6.987093664 | -7.271204458 |
| H291 | 6.171170808  | 3.974342835  | 1.858511829  |
| H292 | 6.406004384  | 6.929177712  | 2.833480748  |
| H293 | 7.566888291  | 6.463193928  | -1.262593053 |
| H294 | 4.873057480  | 5.212685954  | 1.852900540  |
| H295 | 7.956969372  | 7.065572031  | 2.335291724  |
| H296 | 7.884800762  | 1.464055600  | -3.436343084 |
| H297 | 7.680137212  | 5.444538342  | 0.647764177  |
| H298 | 1.134000714  | -6.575787557 | 7.369979172  |
| H299 | 3.312119740  | -8.320274697 | 6.096286959  |
| H300 | 6.365283649  | 0.019604160  | -4.422952181 |
| H301 | 2.830042413  | -0.163485633 | 4.574247217  |
| H302 | 4.544744952  | 0.419241541  | -7.438759443 |
| H303 | 0.233132268  | -3.295347918 | -4.460357537 |
| H304 | 3.732785585  | 1.096259022  | -6.026996499 |
| H305 | 1.230519194  | -4.065401540 | 6.609284554  |
| H306 | 4.709063223  | -1.051293559 | -4.805230832 |
| H307 | 1.134234178  | -4.712530888 | 4.961763238  |
| H308 | 1.203157835  | -7.093330979 | 5.670610531  |
| H309 | 3.375558424  | -5.862723106 | 5.371432987  |

|       |               |               |              |
|-------|---------------|---------------|--------------|
| H310  | 3.305993727   | -5.303232307  | 7.048379518  |
| H311  | -1.811203922  | -1.139106977  | -8.118808670 |
| H312  | 0.996635326   | -9.110924587  | 7.831818202  |
| H313  | 0.189114860   | -11.588729912 | 6.195528069  |
| H314  | 1.783289399   | -1.612638765  | -3.476038489 |
| H315  | 0.418167406   | -11.241076258 | 9.081171045  |
| H316  | -0.922032279  | -11.345863692 | 8.142776797  |
| H317  | 3.336483515   | -3.583629574  | 4.530308021  |
| H318  | 1.909215700   | 0.662660450   | -4.423507573 |
| H319  | -1.078608704  | -2.725534462  | -6.502169747 |
| H320  | 4.993748768   | -11.081602942 | 2.857409456  |
| H321  | 5.683170256   | -9.290224269  | 0.024185497  |
| H322  | 3.957870563   | -8.979037993  | 3.539056254  |
| H323  | 4.539134714   | -11.789786676 | 1.563415211  |
| H324  | 9.023649826   | 0.316227410   | -5.861085465 |
| H325  | 4.769906763   | -5.937363143  | 2.991507208  |
| H326  | 0.243756972   | -7.170689715  | 2.746593318  |
| H327  | 5.926800863   | -3.379496734  | -4.974065342 |
| H328  | 0.910273733   | -9.196082851  | 1.478460812  |
| H329  | 4.089653013   | -8.119949789  | -4.449335831 |
| H330  | 3.036773701   | -6.209033219  | -3.188530695 |
| H331  | 1.358058148   | -12.376871252 | 7.258167197  |
| H332  | 3.644180275   | -1.468753993  | 3.756255323  |
| H333  | 5.829812859   | -6.899787325  | 4.896519732  |
| H334  | 5.673681284   | -4.752115672  | 3.425242513  |
| H335  | 5.195350115   | -7.660713538  | 7.054259966  |
| H336  | 1.189298345   | -2.117926317  | 6.991265164  |
| H337  | 1.021230555   | -12.134141894 | -1.044197654 |
| H338  | 2.529247461   | -8.916717401  | -1.109840275 |
| H339  | 3.293195206   | -9.234011172  | 0.457656678  |
| H340  | 0.336369927   | -8.623196965  | -0.116142235 |
| H341  | 3.572269757   | -3.101842496  | -4.775936867 |
| H342  | 0.608641020   | 1.238153064   | -6.494476463 |
| H343  | -1.316172639  | 0.571340862   | -8.077170945 |
| H344  | 0.678737455   | -5.552807719  | 2.103555086  |
| H345  | 5.564095497   | -8.436861355  | 4.918667131  |
| H346  | 3.971160525   | -10.041394033 | 4.675599034  |
| H347  | 1.211296311   | -0.574541082  | 6.233252099  |
| H348  | 5.837798338   | -9.382310423  | -3.002253798 |
| H349  | 5.533542403   | -7.632502851  | 0.617204290  |
| H350  | 3.359709015   | -3.921400691  | -6.357160072 |
| H351  | 7.608520207   | 2.675857509   | -4.708796287 |
| H352  | 4.694119523   | -0.634435312  | 6.945113138  |
| H353  | 5.764713854   | -0.346462188  | 5.554729360  |
| H354  | 9.096717362   | -8.818690408  | -1.234691489 |
| H355  | 7.986003386   | -9.9696663109 | -0.891605105 |
| H356  | 7.787682170   | -10.426093231 | 3.674436283  |
| H357  | 6.819281299   | -9.859448028  | 1.679599427  |
| H358  | 10.121829126  | -9.961870281  | 2.311062953  |
| H359  | 7.864360377   | -8.673911558  | 3.971891180  |
| H360  | 7.925624196   | -1.173299075  | 6.976153513  |
| H361  | -1.330415610  | 13.855265147  | 0.977096409  |
| H362  | 5.120449263   | -7.561867605  | 10.061096441 |
| H363  | 5.539570235   | -5.189656680  | 8.688086748  |
| H364  | -2.038483340  | 13.100380165  | -1.883265642 |
| H365  | -2.662466029  | 11.184556958  | 0.450002912  |
| H366  | -3.850734021  | 12.030084554  | -0.558251985 |
| H367  | -0.070801614  | -0.957710223  | 0.086159457  |
| H368  | 0.577341116   | -3.262405464  | 0.494584639  |
| H369  | 0.733741565   | -3.776603266  | -0.120366785 |
| H370  | 1.937575995   | -1.547981300  | 0.978181362  |
| Mo371 | 3.490752720   | -5.100220832  | -0.090573919 |
| N372  | -6.711187374  | -5.684635340  | -3.356082706 |
| N373  | -8.824063118  | -2.670674167  | -2.806699644 |
| N374  | -10.182747426 | -2.609178009  | -0.299425042 |
| N375  | -8.505706661  | -4.133932621  | 1.360104941  |
| N376  | -6.155700342  | -2.503922103  | 1.327542381  |
| N377  | -7.204057574  | -0.196264003  | 2.650342966  |
| N378  | -8.168003220  | -1.175850499  | 5.192270321  |
| N379  | -6.196380285  | -2.937854492  | 6.322884732  |
| N380  | -3.631541744  | -1.925168132  | 5.870876400  |
| N381  | -3.339849694  | 1.021366026   | 5.808886332  |
| N382  | -5.315780641  | 1.759875138   | 7.852031676  |
| N383  | 0.015395929   | -10.944983313 | 8.189902315  |
| N384  | 1.756827983   | -9.190253087  | 7.147743230  |
| N385  | 2.682533434   | -3.317010313  | 5.271326442  |
| N386  | 1.411322606   | -1.568364237  | 6.168346998  |
| N387  | 2.898214460   | -1.166985713  | 4.425538963  |
| N388  | 4.790279442   | -7.619690970  | 8.015781314  |
| N389  | -4.435956931  | -2.141837653  | -4.915653281 |

|      |              |               |              |
|------|--------------|---------------|--------------|
| N390 | -2.127141554 | -5.564200682  | -2.485897455 |
| N391 | -4.308316305 | 0.497474652   | -4.572227874 |
| N392 | -6.561734965 | 2.186027306   | -4.670914508 |
| N393 | -7.385593416 | 2.188008900   | -1.994312871 |
| N394 | -5.327859685 | 3.538019337   | -0.632321739 |
| N395 | -1.515938516 | 3.315660735   | -2.514144109 |
| N396 | -1.314552858 | 1.352554498   | -1.533453399 |
| N397 | -5.596210569 | 6.303856478   | -0.639059232 |
| N398 | -7.551686554 | 9.555022133   | -3.585824344 |
| N399 | -7.307982690 | 11.519703414  | -2.583795464 |
| N400 | 7.445800752  | 1.371507038   | 6.830044045  |
| N401 | 7.190039322  | 6.394959597   | 2.444221920  |
| N402 | 6.852516424  | 7.136599930   | -0.999118168 |
| N403 | 4.638694413  | 6.549186478   | -2.590125972 |
| N404 | 0.965967079  | 5.639163673   | -5.714409321 |
| N405 | 2.267928309  | 7.177879546   | -6.904267082 |
| N406 | 0.277533685  | 7.847671813   | -5.922897926 |
| N407 | 2.374287654  | 6.042816943   | -0.879543701 |
| N408 | 2.375836714  | 8.426401491   | 0.588045519  |
| N409 | 2.000231425  | 10.974372608  | -0.573842205 |
| N410 | 1.912396503  | 9.804891917   | -3.679242139 |
| N411 | -0.474537260 | 12.197217130  | -0.812374054 |
| N412 | 7.596364597  | -6.315517655  | -6.986152039 |
| N413 | 5.316333700  | -3.812144733  | -5.677859174 |
| N414 | 4.492930081  | -0.857480046  | -5.807776522 |
| N415 | 6.637322594  | 0.836049133   | -4.986514852 |
| N416 | 2.732025672  | -3.941404112  | -9.581501422 |
| N417 | 0.858991881  | -1.897469759  | -9.040209700 |
| N418 | 8.088829526  | -8.999703636  | -1.207216946 |
| N419 | 4.296851643  | -6.823293613  | -1.555876376 |
| N420 | 4.350682644  | -7.886513330  | -3.492573724 |
| N421 | 7.623267549  | -9.291601856  | 1.945591076  |
| O422 | -7.293828194 | -3.621957615  | -1.415488374 |
| O423 | -8.878227288 | -0.839556647  | 0.290511541  |
| O424 | -9.433746562 | -3.115262671  | 3.184823599  |
| O425 | -5.762800873 | -3.262269832  | 3.435848762  |
| O426 | -5.099778208 | 0.160620989   | 3.434959928  |
| O427 | -7.490148412 | 0.835052258   | 6.041950140  |
| O428 | -7.066676315 | -2.473754237  | 8.396644946  |
| O429 | -2.694566065 | -3.530233656  | 7.224090579  |
| O430 | -1.430684447 | 0.483411523   | 6.951447856  |
| O431 | -3.567815056 | 2.908009435   | 8.732116715  |
| O432 | -5.399571435 | 1.419023189   | 11.426281633 |
| O433 | 2.790750502  | -10.777069004 | 5.820983877  |
| O434 | 2.903096493  | -7.771035126  | 9.318414923  |
| O435 | 7.197335896  | -5.618991370  | 9.795557046  |
| O436 | -5.147741670 | 0.404438610   | -2.436812364 |
| O437 | -3.418655350 | -4.757032794  | -4.174925220 |
| O438 | -5.316281581 | 3.827770001   | -3.701087313 |
| O439 | -3.435938299 | 3.705323748   | -6.240483615 |
| O440 | -9.047174491 | 3.702578349   | -2.476151056 |
| O441 | -6.392032981 | 3.241838184   | 1.369209405  |
| O442 | -4.297065719 | 6.431616786   | 1.230209166  |
| O443 | -6.213789705 | 9.286624594   | 1.149384160  |
| O444 | 6.972643324  | -1.538876050  | 8.744822163  |
| O445 | 2.266723040  | 4.671180373   | 4.897623669  |
| O446 | 5.338076144  | 7.775746368   | 0.580471467  |
| O447 | 4.585572560  | 8.702237985   | -3.398260190 |
| O448 | 1.128365308  | 6.877448426   | -2.609693140 |
| O449 | 0.169039352  | 8.117031837   | 1.121175417  |
| O450 | 2.424763390  | 5.706433649   | 2.161746280  |
| O451 | 2.501410571  | 12.008805527  | 1.405576732  |
| O452 | 0.457949614  | 14.120559512  | -1.603385314 |
| O453 | 0.354464822  | 11.450705057  | -3.960364845 |
| O454 | -2.916445396 | 14.683018581  | -0.005570422 |
| O455 | -2.374843735 | 7.456995395   | -4.500072957 |
| O456 | 4.922000579  | -5.627305240  | -7.021619643 |
| O457 | 3.587214248  | -1.772437209  | -7.703237588 |
| O458 | 6.059224075  | 2.349394900   | -6.602609882 |
| O459 | 10.135076795 | 1.793234275   | -4.995925678 |
| O460 | -0.769579933 | -3.282852566  | -9.828314788 |
| O461 | 0.847883880  | -7.787944651  | -6.187654773 |
| O462 | 2.938866414  | -7.031231931  | -5.969348100 |
| O463 | 0.661382149  | 1.638082207   | -9.202196617 |
| O464 | 9.035770307  | -7.566940294  | 1.554095117  |
| O465 | 10.384109333 | -9.333739438  | 4.235233286  |
| O466 | -1.239560561 | -5.537450747  | 0.346543785  |
| O467 | -1.755899826 | -7.555333288  | 1.124236187  |
| O468 | 2.902297161  | -11.715755915 | 0.186102979  |
| O469 | 1.061067483  | -11.154984999 | -0.998152850 |

|                   |                                     |               |               |               |
|-------------------|-------------------------------------|---------------|---------------|---------------|
|                   | O470                                | 3.834893549   | -6.620552251  | 1.552494249   |
|                   | O471                                | 2.716035046   | -7.976926156  | 2.960626589   |
|                   | O472                                | 1.807757811   | -6.398981189  | -0.130132840  |
|                   | O473                                | 5.991095582   | -7.709461635  | 5.443612103   |
|                   | O474                                | 5.216575812   | -5.539439343  | 3.781903504   |
|                   | O475                                | -1.597028274  | 4.948209104   | -4.633857312  |
|                   | O476                                | 5.261829825   | -11.795484840 | 2.224444521   |
|                   | O477                                | 4.563692308   | -9.635134786  | 3.991634553   |
|                   | S478                                | 5.079429545   | 4.153997522   | -0.311996026  |
|                   | S479                                | 3.287626038   | 1.116076990   | -1.940907023  |
|                   | S480                                | 2.569991118   | -3.944805714  | -1.953584719  |
|                   | S481                                | 3.128642611   | 1.131144336   | 1.491250319   |
|                   | S482                                | 0.675050926   | -1.075472123  | -1.046836901  |
|                   | S483                                | 5.721821918   | -1.837848311  | -3.010858686  |
|                   | S484                                | 2.738771339   | -3.828336209  | 1.761337886   |
|                   | S485                                | 6.396849252   | 0.640083321   | -0.178428794  |
|                   | S486                                | 5.793258227   | -4.408471965  | -0.179977409  |
|                   | S487                                | 5.585412183   | -1.766798500  | 2.734022769   |
| <b>16 (S=3/2)</b> | <b>bm1s2b2hx6h2xconexadtj.car_2</b> |               |               |               |
| Fe(139) 2.478     | C1                                  | -9.004319266  | -3.705919545  | -1.969323819  |
| Fe(140) 0.232     | C2                                  | -8.566002148  | -2.250233590  | -2.163151025  |
| Fe(141) 2.720     | C3                                  | -8.406201169  | -0.354822130  | -3.724826059  |
| Fe(142) -2.472    | C4                                  | -8.999207687  | 0.766862842   | -2.877367408  |
| Fe(143) 2.851     | C5                                  | -10.835723303 | 1.549054261   | -1.472528221  |
| Fe(144) -2.399    | C6                                  | -10.115872563 | 1.689654583   | -0.126056636  |
| Fe(145) -0.743    | C7                                  | -6.698813095  | 0.595267678   | 1.546315570   |
|                   | C8                                  | -7.337504325  | 1.256686852   | 1.312707679   |
|                   | C9                                  | -5.468527704  | 1.622636656   | -0.214857593  |
|                   | C10                                 | -5.601602856  | 3.147483238   | -0.340153993  |
|                   | C11                                 | -6.898766286  | 5.038752463   | -1.129310692  |
|                   | C12                                 | -7.287493094  | 5.764637698   | 0.165391009   |
|                   | C13                                 | -8.779165260  | 5.822701221   | 2.105092234   |
|                   | C14                                 | -8.006982018  | 5.693125934   | 3.423713123   |
|                   | C15                                 | -6.663361567  | 4.238631308   | 4.878636251   |
|                   | C16                                 | -5.135190059  | 4.151821822   | 4.864213664   |
|                   | C17                                 | -3.101273076  | 4.097000326   | 3.445277639   |
|                   | C18                                 | -2.505394934  | 5.416887590   | 2.919624997   |
|                   | C19                                 | -2.752907931  | 2.862093785   | 2.571636540   |
|                   | C20                                 | -1.259418392  | 2.794284000   | 2.232762666   |
|                   | C21                                 | -3.218578728  | 1.569630367   | 3.250129905   |
|                   | C22                                 | -2.502622251  | 7.112120648   | 1.129870570   |
|                   | C23                                 | -3.211177303  | 8.330931631   | 1.755240218   |
|                   | C24                                 | -2.615618115  | 7.083417656   | -0.412294369  |
|                   | C25                                 | -2.242447304  | 8.441703136   | -1.018576916  |
|                   | C26                                 | -1.735522958  | 5.973880456   | -1.001150071  |
|                   | C27                                 | -5.284526056  | 9.483223402   | 2.259479831   |
|                   | C28                                 | -4.897886260  | 9.846432397   | 3.679102347   |
|                   | C29                                 | -4.847470832  | -1.550954211  | 12.472037690  |
|                   | C30                                 | -3.408475796  | -1.524874350  | 11.949360489  |
|                   | C31                                 | -1.740497868  | -0.066282401  | 10.796950898  |
|                   | C32                                 | -0.988106221  | 0.881967174   | 11.752085886  |
|                   | C33                                 | -1.894621641  | 0.569199053   | 9.403834539   |
|                   | C34                                 | -0.554883561  | 0.786418689   | 8.697163579   |
|                   | C35                                 | -0.741168295  | 1.421928519   | 7.322812918   |
|                   | C36                                 | 0.835688148   | 2.326690666   | 5.610183875   |
|                   | C37                                 | 1.121760773   | 1.314331770   | 12.916664344  |
|                   | C38                                 | 2.211961437   | 2.084080502   | 12.200998690  |
|                   | C39                                 | -4.598328401  | -2.676254340  | -2.882176266  |
|                   | C40                                 | -4.044860235  | -1.683776287  | -3.911827486  |
|                   | C41                                 | -3.745559738  | -2.556108719  | -1.598837979  |
|                   | C42                                 | -4.427089756  | -2.967647749  | -0.278101936  |
|                   | C43                                 | -4.453233757  | -4.457093164  | 0.040368544   |
|                   | C44                                 | -2.493324642  | -1.462864027  | -5.831285932  |
|                   | C45                                 | -3.286323086  | -0.435854595  | -6.639845057  |
|                   | C46                                 | -1.719934988  | -2.443101289  | -6.752739345  |
|                   | C47                                 | -5.423876861  | 0.169553532   | -7.671872017  |
|                   | C48                                 | -5.744225036  | 1.464817092   | -6.913049595  |
|                   | C49                                 | -5.611719945  | 2.675503048   | -4.776378455  |
|                   | C50                                 | -4.308298914  | 3.399105707   | -4.418594097  |
|                   | C51                                 | -1.868744816  | 3.511805494   | -4.609465533  |
|                   | C52                                 | -1.691187661  | 4.708324216   | -5.563305604  |
|                   | C53                                 | -0.667937734  | 2.588983243   | -4.867396631  |
|                   | C54                                 | -0.505447382  | 1.416339941   | -3.955566007  |
|                   | C55                                 | -0.940691320  | 1.193572165   | -2.666024693  |
|                   | C56                                 | 0.261427180   | -0.530245054  | -3.358884997  |
|                   | C57                                 | -1.821638375  | 5.398526056   | -7.914439873  |
|                   | C58                                 | -2.237611003  | 6.817155556   | -7.529091901  |
|                   | C59                                 | -2.590327010  | 4.928255655   | -9.169805931  |
|                   | C60                                 | -2.099056911  | 5.449952962   | -10.488873722 |

|       |              |               |               |
|-------|--------------|---------------|---------------|
| C61   | -1.466830062 | 6.633375324   | -10.817416003 |
| C62   | -1.754633535 | 5.382897795   | -12.624428025 |
| C63   | 5.434066876  | 4.477851892   | 6.917570020   |
| C64   | 5.427851300  | 3.790526108   | 8.269885305   |
| C65   | 4.295033318  | 3.838197948   | 6.083118283   |
| C66   | 4.161239241  | 4.446401880   | 4.707227590   |
| C67   | 3.381472911  | 5.596787316   | 4.485802381   |
| C68   | 4.818763781  | 3.874412855   | 3.602865942   |
| C69   | 3.251778675  | 6.154418064   | 3.208895521   |
| C70   | 4.707549790  | 4.424970166   | 2.325773436   |
| C71   | 3.918153388  | 5.562004503   | 2.129148975   |
| C72   | 8.631612737  | 2.778261281   | -0.611354875  |
| C73   | 8.706351573  | 2.885896357   | -2.140041584  |
| C74   | 7.190545817  | 2.466261811   | -0.183804372  |
| C75   | 9.485739794  | 1.824472966   | -4.218362242  |
| C76   | 8.228343037  | 1.397803515   | -4.979631512  |
| C77   | 5.952405848  | 0.443081674   | -4.817723982  |
| C78   | 4.941666469  | 1.610608207   | -4.800574933  |
| C79   | 5.436674455  | -0.808005088  | -4.081507027  |
| C80   | 4.104287605  | -1.401111638  | -4.552397091  |
| C81   | 4.111659590  | -2.117264953  | -5.913553905  |
| C82   | 4.496801504  | -0.946969993  | -8.091148575  |
| C83   | 3.943154732  | 3.477204191   | -3.592794905  |
| C84   | 4.454607150  | 4.773111796   | -4.253530536  |
| C85   | 3.526399888  | 3.800003979   | -2.152424989  |
| C86   | 6.390781806  | 6.233271950   | -4.580658312  |
| C87   | 6.917293260  | 6.546991373   | -5.978509711  |
| C88   | 7.248164314  | 5.797694278   | -8.296690269  |
| C89   | 6.343166490  | 6.585960335   | -9.268430662  |
| C90   | 7.672004395  | 4.444530890   | -8.908956372  |
| C91   | 6.479151914  | 3.519820266   | -9.126236800  |
| C92   | 4.057017256  | 7.316237227   | -9.785012986  |
| C93   | 4.332196883  | 8.793876476   | -10.030194994 |
| C94   | 2.639439847  | 7.134728805   | -9.179339178  |
| C95   | 2.257517395  | 5.677474929   | -9.051915533  |
| C96   | 1.758437495  | 4.971946537   | -10.158460682 |
| C97   | 2.441899582  | 4.977465582   | -7.847668457  |
| C98   | 1.464627846  | 3.608727584   | -10.078217347 |
| C99   | 2.175806015  | 3.607747270   | -7.754455065  |
| C100  | 1.692000048  | 2.934862153   | -8.876388706  |
| C101  | 4.295517902  | -9.436175012  | 2.684563970   |
| C102  | 3.309560971  | -9.095550951  | 1.579891802   |
| C103  | 2.541757471  | -7.313420464  | 0.036761780   |
| C104  | 3.208326867  | -7.054329047  | -1.320264649  |
| C105  | 4.800043650  | -5.635375926  | -2.528364164  |
| C106  | 6.249221956  | -5.185795112  | -2.350439678  |
| C107  | 8.009835348  | -4.321578037  | -0.891755942  |
| C108  | 9.092308480  | -5.354578943  | -0.652893774  |
| C109  | -0.002882474 | -10.030545066 | -2.485034367  |
| C110  | -0.331705383 | -9.216341511  | -3.743047927  |
| C111  | -0.668315467 | -9.397668961  | -1.239219403  |
| C112  | -0.707290914 | -10.410861445 | -0.079439785  |
| C113  | -1.117308591 | -9.772445351  | 1.230067437   |
| C114  | 0.363198598  | -7.487142366  | -5.331460113  |
| C115  | 1.685139290  | -7.226463999  | -6.029515794  |
| C116  | -0.499617859 | -6.223410993  | -5.086272706  |
| C117  | -0.109538023 | -5.488627882  | -3.829145764  |
| C118  | 1.002703088  | -4.629882570  | -3.800394148  |
| C119  | -0.805699240 | -5.729937431  | -2.633113924  |
| C120  | 1.430575711  | -4.062750949  | -2.596159062  |
| C121  | -0.376142827 | -5.165315694  | -1.427630484  |
| C122  | 0.752897250  | -4.343070091  | -1.405589943  |
| C123  | 3.100335223  | -6.683707304  | 8.151068271   |
| C124  | 3.484468833  | -5.861240406  | 9.390541561   |
| C125  | 1.654584328  | -6.431946118  | 7.697474704   |
| C126  | 1.269260048  | -7.042798748  | 6.385727074   |
| C127  | 1.087012798  | -8.382381726  | 6.103982654   |
| C128  | 0.538142826  | -7.175517928  | 4.334191273   |
| C129  | 2.889980072  | -4.969456116  | 11.576729712  |
| C130  | 4.185719031  | -5.427878139  | 12.207522328  |
| C131  | -3.794776786 | -2.870848861  | 4.668286001   |
| C132  | -2.751898409 | -2.620133563  | 5.718698088   |
| C133  | -1.900578996 | -3.910849556  | 6.066653538   |
| C134  | -2.831140677 | -5.003049399  | 6.671161899   |
| C135  | -2.032118366 | -6.209342961  | 7.194848506   |
| C136  | -2.847761534 | -7.196112096  | 7.979847924   |
| C137  | -0.920995646 | -3.477202067  | 7.199589316   |
| C138  | 2.834460702  | -2.043341646  | 2.433711973   |
| Fe139 | 2.850984583  | -3.971923543  | 2.869624507   |
| Fe140 | 2.639592706  | -0.741546738  | 0.788274990   |



|       |               |               |              |
|-------|---------------|---------------|--------------|
| Fe141 | 4.137356526   | -0.583737457  | 2.900261446  |
| Fe142 | 4.385761704   | -2.629545692  | 1.336224799  |
| Fe143 | 5.112409264   | -0.199210534  | 0.427314133  |
| Fe144 | 2.693925201   | -1.961294011  | 4.440339376  |
| Fe145 | 0.686993143   | -2.293124609  | 2.573358761  |
| H146  | -8.242666120  | -3.928961565  | -0.090993491 |
| H147  | -7.307724975  | -4.612969748  | -1.249103196 |
| H148  | -9.211614075  | -2.295557949  | -4.112366358 |
| H149  | -8.957705939  | -4.236197364  | -2.932616260 |
| H150  | -10.072388944 | -3.669823193  | -1.691687302 |
| H151  | -7.313204665  | -0.271251100  | -3.635262663 |
| H152  | -10.715973387 | -0.311930248  | -2.549328655 |
| H153  | -8.676227055  | -0.171007945  | -4.773705658 |
| H154  | -11.880439977 | 1.262964720   | -1.290226351 |
| H155  | -9.471585242  | -0.257815113  | -0.245483767 |
| H156  | -10.827463978 | 2.541649315   | -1.940597404 |
| H157  | -4.699232626  | 1.430967877   | 0.543593606  |
| H158  | -7.115109840  | 0.261218177   | -0.484233885 |
| H159  | -8.547049762  | -0.435486701  | 1.896138026  |
| H160  | -5.974969495  | 5.501640872   | -1.499869338 |
| H161  | -7.352188711  | 2.953015591   | -1.424461863 |
| H162  | -9.196687746  | 1.162829944   | 2.341410246  |
| H163  | -5.122822678  | 1.204464760   | -1.171086445 |
| H164  | -8.657478161  | 4.283382548   | 0.629419612  |
| H165  | -7.693269076  | 5.203782011   | -1.870698719 |
| H166  | -4.300123627  | 1.580603453   | 3.444677036  |
| H167  | -2.999895581  | 0.700357166   | 2.611387885  |
| H168  | -2.694509531  | 1.415277924   | 4.206257401  |
| H169  | -3.304605710  | 2.976983650   | 1.624849824  |
| H170  | -9.788142659  | 5.419667359   | 2.275817030  |
| H171  | -2.019151811  | 4.980349789   | -0.627942871 |
| H172  | -5.112909266  | 7.581022547   | 1.317161780  |
| H173  | -2.908481882  | 9.248886381   | -0.680733473 |
| H174  | -1.072851743  | 1.967696894   | 1.529432266  |
| H175  | -0.652885543  | 2.602117503   | 3.128913371  |
| H176  | 5.180056340   | 5.542892905   | 7.081686927  |
| H177  | -1.828071201  | 5.962401356   | -2.096632900 |
| H178  | -2.304132818  | 8.388161172   | -2.115105587 |
| H179  | -0.676970358  | 6.148746348   | -0.747468098 |
| H180  | -1.210667804  | 8.719263711   | -0.749994852 |
| H181  | -3.668330956  | 6.870086099   | -0.672321008 |
| H182  | -1.445869545  | 7.235204444   | 1.409566372  |
| H183  | -3.608790980  | 5.269804023   | 1.171473229  |
| H184  | -0.895295122  | 3.719923175   | 1.761268688  |
| H185  | 3.247276402   | 2.860917283   | -1.641139650 |
| H186  | 2.638429017   | 4.451671220   | -2.207600537 |
| H187  | 4.234801358   | 4.912504636   | -0.693401331 |
| H188  | 3.214006925   | 6.813449435   | 0.824603305  |
| H189  | 5.195680130   | 3.951782465   | 1.473780882  |
| H190  | 5.396586815   | 2.957365081   | 3.736016371  |
| H191  | 2.856115410   | 6.065529076   | 5.321990818  |
| H192  | -5.145041883  | 4.280936871   | 2.827201926  |
| H193  | -7.029300833  | 3.280288033   | 5.279143745  |
| H194  | -6.937271070  | 5.028171739   | 5.590705060  |
| H195  | -7.399314204  | 3.769153575   | 2.935554671  |
| H196  | -8.867233738  | 6.898077921   | 1.904505167  |
| H197  | 2.623858039   | 7.034564512   | 3.049231004  |
| H198  | -2.669775806  | 3.967359703   | 4.446543171  |
| H199  | -5.137656995  | 10.365095010  | 1.614981086  |
| H200  | -6.358494536  | 9.237845944   | 2.263549776  |
| H201  | -4.515889581  | 9.000816969   | 4.297724520  |
| H202  | 1.576959794   | 0.684486277   | 13.695875302 |
| H203  | -4.248185158  | -5.756850823  | 1.601442886  |
| H204  | -5.039389037  | -3.273657427  | 6.084807623  |
| H205  | -1.442369253  | -11.194101289 | -0.314647799 |
| H206  | 0.277995243   | -10.885826725 | 0.036587454  |
| H207  | -1.696910297  | -9.089824525  | -1.483452453 |
| H208  | 2.430644014   | -8.048662864  | -5.913411233 |
| H209  | -0.525658778  | -10.983877463 | -2.666945642 |
| H210  | -2.810002255  | -3.120304281  | -1.747621114 |
| H211  | -5.478047281  | -2.628012809  | -0.283350087 |
| H212  | 1.411076887   | -8.113781685  | -3.565268114 |
| H213  | -0.192920722  | -8.128022166  | -6.044565704 |
| H214  | 1.977916624   | -9.523726698  | -2.109978239 |
| H215  | -4.004635828  | -4.074359668  | 2.045878352  |
| H216  | -0.120108235  | -8.487890450  | -0.952793466 |
| H217  | 1.571251267   | -11.050657470 | -1.658969473 |
| H218  | -5.428429578  | -4.210187921  | -3.973961994 |
| H219  | -3.465895077  | -1.497577432  | -1.491309334 |
| H220  | 0.797856208   | -9.625577615  | 1.666022843  |

|      |              |               |               |
|------|--------------|---------------|---------------|
| H221 | -3.938860328 | -2.431796854  | 0.548759618   |
| H222 | -1.849583305 | 3.922627574   | -3.591224928  |
| H223 | -1.545551582 | 1.785422803   | -1.987874386  |
| H224 | -6.232145104 | 3.395775405   | -5.326738677  |
| H225 | -5.066449094 | 0.652080131   | -5.124804528  |
| H226 | -2.639475881 | 3.628365814   | -7.034278941  |
| H227 | -1.149050142 | 7.479069894   | -10.216759557 |
| H228 | -3.165275280 | 6.855551189   | -6.909451268  |
| H229 | -3.663700040 | 5.152374208   | -9.038058545  |
| H230 | -0.736531468 | 5.390048317   | -8.108185057  |
| H231 | -1.717563643 | 5.083644081   | -13.668798367 |
| H232 | 0.233326896  | 3.222414278   | -4.816167419  |
| H233 | -0.730189176 | 2.214007846   | -5.900760476  |
| H234 | -0.804168537 | 7.284894522   | -12.745592340 |
| H235 | -2.512228476 | 3.829950611   | -9.217267945  |
| H236 | -3.144943603 | 1.964938560   | -5.374149952  |
| H237 | -6.134146982 | 2.449161134   | -3.835888025  |
| H238 | -4.971345382 | 0.480976235   | -8.624215242  |
| H239 | 0.755405710  | -1.497915848  | -3.337415848  |
| H240 | -6.369994561 | -0.337652330  | -7.902483082  |
| H241 | -0.487595760 | -0.509444916  | -1.398685294  |
| H242 | 7.432778441  | 4.876416724   | 6.699368576   |
| H243 | 6.682241620  | 4.508892837   | 5.292968652   |
| H244 | 5.365051137  | 2.041591408   | -2.805461968  |
| H245 | 3.040243562  | 3.194374336   | -4.152396033  |
| H246 | 6.399204101  | 4.254779600   | -3.842824012  |
| H247 | 0.808213728  | 0.022353677   | -5.927105031  |
| H248 | -0.258707402 | -1.252845193  | -7.382111052  |
| H249 | 1.052241409  | 0.586246729   | -7.413268727  |
| H250 | 0.964659494  | 1.255664889   | -9.545881650  |
| H251 | -1.076927983 | -3.065433257  | -6.101051012  |
| H252 | -2.449812932 | -3.109730634  | -7.240422839  |
| H253 | 8.427867642  | 3.987424838   | -8.253175007  |
| H254 | 8.129073040  | 4.648894915   | -9.886400767  |
| H255 | 6.993199381  | 2.331129658   | -7.458751877  |
| H256 | 5.461816318  | 1.987372539   | -8.228250675  |
| H257 | 6.215041408  | -1.300630387  | -9.147865221  |
| H258 | 3.379247212  | -2.938342093  | -5.906963961  |
| H259 | 1.068063650  | 3.075027910   | -10.945707792 |
| H260 | 2.794191328  | 5.496917954   | -6.951751239  |
| H261 | 3.223878457  | 0.520113037   | -8.774989303  |
| H262 | 5.329541423  | -0.570275100  | -3.011854608  |
| H263 | 7.326037583  | 0.805067449   | -3.222881421  |
| H264 | 3.307508306  | -0.640550605  | -4.541215683  |
| H265 | -4.928342522 | -1.661664032  | -6.661409643  |
| H266 | 10.291244269 | 1.125815019   | -4.482851782  |
| H267 | -3.219938966 | -3.260594899  | -4.822896162  |
| H268 | 6.222356781  | -1.578608136  | -4.152654580  |
| H269 | 2.379894975  | 3.065453139   | -6.830245995  |
| H270 | 9.760540006  | 2.814071743   | -4.607900538  |
| H271 | 5.865994863  | -2.477059421  | -7.930273107  |
| H272 | 4.430144113  | 0.004485857   | -9.893212026  |
| H273 | -4.621121085 | -4.698561196  | -2.615028760  |
| H274 | -5.610597038 | -2.297374027  | -2.644780287  |
| H275 | 1.591654322  | 5.491882016   | -11.104180710 |
| H276 | -1.766461392 | -0.863965242  | -5.262561802  |
| H277 | 6.119500368  | 0.223428922   | -5.880251999  |
| H278 | 5.095166389  | -2.572060974  | -6.090347230  |
| H279 | 3.817140511  | -2.141537624  | -3.790971241  |
| H280 | 2.808606149  | -0.796513469  | -6.966472526  |
| H281 | 5.639408505  | 7.004463684   | -4.355801074  |
| H282 | 6.284578708  | 4.725831848   | -6.687996883  |
| H283 | 8.148451644  | 6.419637859   | -8.187259375  |
| H284 | 7.232407697  | 6.374807208   | -3.888581461  |
| H285 | 4.745384831  | 6.288036900   | -8.036462973  |
| H286 | 5.259618909  | -8.942408770  | 2.493936210   |
| H287 | 3.876960081  | -8.974640232  | 3.604097369   |
| H288 | 3.781897106  | -6.350709575  | 7.355770204   |
| H289 | 4.922558044  | -11.100963803 | 3.678402935   |
| H290 | 3.568248750  | -11.332527148 | 2.785893269   |
| H291 | 7.173205046  | 2.328722735   | 0.904946934   |
| H292 | 8.559894445  | 4.801051833   | -0.355907525  |
| H293 | 9.712589029  | 1.096027787   | -2.223166263  |
| H294 | 6.540693152  | 3.309085604   | -0.460834402  |
| H295 | 10.061717218 | 4.181748056   | -0.166313601  |
| H296 | 7.973657073  | -3.648956078  | -0.019102423  |
| H297 | 9.285056642  | 1.958899796   | -0.272305110  |
| H298 | -2.437620982 | 1.523727172   | 9.510984937   |
| H299 | -1.198326985 | -1.015109328  | 10.703456443  |
| H300 | 6.049978360  | -4.894373362  | -0.298381776  |

|       |               |              |               |
|-------|---------------|--------------|---------------|
| H301  | 2.157617089   | 2.738972832  | 4.111508173   |
| H302  | 4.803865159   | -6.497191042 | -3.207734189  |
| H303  | -0.913039975  | -5.370077659 | -0.498653306  |
| H304  | 4.288343753   | -4.815362564 | -3.061202213  |
| H305  | -1.125781932  | 2.442908440  | 7.441907144   |
| H306  | 4.095533022   | -5.420516087 | -0.480570970  |
| H307  | -1.484477965  | 0.856311576  | 6.733063439   |
| H308  | -2.523651075  | -0.106112600 | 8.802349091   |
| H309  | -0.037844872  | -0.178047902 | 8.579849445   |
| H310  | 0.105864285   | 1.432553511  | 9.295729820   |
| H311  | -1.548918778  | -6.543058501 | -5.020925824  |
| H312  | -3.763046794  | 0.368535913  | 11.409275914  |
| H313  | -5.404404103  | -2.207934604 | 11.786943503  |
| H314  | 1.105072096   | -3.923757744 | -0.463304389  |
| H315  | -5.353233064  | 0.215454866  | 13.404302272  |
| H316  | -6.493553521  | -0.319635751 | 12.358514414  |
| H317  | 1.016614325   | 0.552152771  | 6.533466047   |
| H318  | 2.301594213   | -3.402912659 | -2.564110679  |
| H319  | -1.685525776  | -6.379578996 | -2.648319404  |
| H320  | -0.694469029  | -5.518096078 | 11.164214438  |
| H321  | 0.970051476   | -6.825512866 | 8.469730580   |
| H322  | -0.740374885  | -3.499502190 | 9.793180712   |
| H323  | -1.312134698  | -6.840525723 | 10.657647738  |
| H324  | 8.752117927   | -6.419035909 | -0.651001244  |
| H325  | 1.381744484   | -2.332892630 | 7.718189466   |
| H326  | -3.202383472  | -2.237059700 | 6.646967388   |
| H327  | 4.164176909   | -7.233988828 | 1.380484154   |
| H328  | -3.406126930  | -4.556505815 | 7.497806215   |
| H329  | 0.362215383   | -9.267848660 | 4.273924784   |
| H330  | 0.194605373   | -6.936087333 | 3.335620981   |
| H331  | -4.818705929  | -2.063196866 | 13.449008894  |
| H332  | 2.335451703   | 1.143761850  | 4.784368189   |
| H333  | 1.777731012   | -1.679665918 | 9.966045213   |
| H334  | 2.680374505   | -1.510472766 | 7.505857250   |
| H335  | 0.702886060   | -0.332273862 | 11.599259424  |
| H336  | -0.337422151  | 3.861093516  | 6.321707730   |
| H337  | -4.319117127  | -8.375342165 | 7.847879266   |
| H338  | -1.575169549  | -6.726594623 | 6.337936495   |
| H339  | -1.223994854  | -5.878934528 | 7.857244826   |
| H340  | -3.533599173  | -5.339942416 | 5.894707635   |
| H341  | 2.142496541   | -6.375025592 | 0.453363668   |
| H342  | 1.541491513   | -4.428071771 | -4.729320541  |
| H343  | -0.392883714  | -5.584381572 | -5.976933105  |
| H344  | -2.045207623  | -1.877709206 | 5.323803406   |
| H345  | 0.856173430   | -2.511206720 | 10.911152345  |
| H346  | -1.248649414  | -3.272960550 | 11.249613509  |
| H347  | 0.478307283   | 4.198626982  | 4.845194386   |
| H348  | 1.247701176   | -9.266824813 | 6.708822476   |
| H349  | 1.480460452   | -5.350637083 | 7.640037677   |
| H350  | 1.726149268   | -8.023819306 | -0.115700252  |
| H351  | 8.295490356   | -3.714474999 | -1.764903609  |
| H352  | 3.357976842   | 3.972219519  | 6.644109125   |
| H353  | 4.482188570   | 2.756192195  | 5.995589025   |
| H354  | 4.342892535   | -8.251709963 | 8.612563339   |
| H355  | 2.826590743   | -8.431787026 | 9.202353485   |
| H356  | 2.090105637   | -5.146184534 | 12.313222348  |
| H357  | 1.601000435   | -6.059325579 | 10.275258798  |
| H358  | 4.453235215   | -6.495301166 | 12.020366304  |
| H359  | 2.930780918   | -3.884457446 | 11.388539073  |
| H360  | 5.930515763   | 2.793235543  | 8.276964188   |
| H361  | 4.967837182   | 9.293352744  | -9.261906181  |
| H362  | 0.474477970   | 2.058915399  | 13.411191338  |
| H363  | 2.008791778   | 2.312525736  | 11.126417513  |
| H364  | 4.094202915   | 6.808909179  | -10.763487314 |
| H365  | 2.603640349   | 7.631124780  | -8.196801966  |
| H366  | 1.932249728   | 7.661436329  | -9.836043395  |
| H367  | -0.191372345  | -0.259497417 | 0.772748384   |
| H368  | -0.934173381  | -1.880461739 | 2.732268689   |
| H369  | -0.964758401  | -2.652427786 | 2.461985724   |
| H370  | 2.197611386   | 0.263670960  | -0.267491413  |
| Mo371 | 0.825128021   | -3.938648777 | 4.736951229   |
| N372  | -8.279618087  | -4.464797381 | -0.961808833  |
| N373  | -8.857409063  | -1.695161915 | -3.371683024  |
| N374  | -10.235308796 | 0.563634661  | -2.357623778  |
| N375  | -9.538283127  | 0.561515986  | 0.359019353   |
| N376  | -6.719379327  | 0.965172082  | 0.140852571   |
| N377  | -6.710141710  | 3.606434928  | -0.968210661  |
| N378  | -8.214677113  | 5.149721767  | 0.945244675   |
| N379  | -7.313860998  | 4.534152375  | 3.612495506   |
| N380  | -4.541675198  | 4.223846468  | 3.645435533   |

|      |               |               |               |
|------|---------------|---------------|---------------|
| N381 | -2.971946022  | 5.856185242   | 1.715930282   |
| N382 | -4.569117435  | 8.317058226   | 1.773012905   |
| N383 | -5.485951448  | -0.229790667  | 12.494103164  |
| N384 | -3.051112971  | -0.367816586  | 11.358771926  |
| N385 | 0.532791963   | 1.452890003   | 6.589699846   |
| N386 | 0.178802248   | 3.505917080   | 5.524288254   |
| N387 | 1.752063615   | 2.008566520   | 4.692790243   |
| N388 | 0.290811644   | 0.526436277   | 12.027740091  |
| N389 | -4.588636144  | -4.044504837  | -3.412941882  |
| N390 | -4.206502287  | -4.777427822  | 1.327054936   |
| N391 | -3.316984701  | -2.239757328  | -4.909449720  |
| N392 | -4.556580978  | -0.771042601  | -6.982009835  |
| N393 | -5.485249858  | 1.473965645   | -5.578444606  |
| N394 | -3.138713871  | 2.826023346   | -4.821191617  |
| N395 | 0.242340201   | 0.327944389   | -4.376447409  |
| N396 | -0.452304886  | -0.047724076  | -2.316684288  |
| N397 | -2.157625541  | 4.498844124   | -6.821890126  |
| N398 | -2.273939104  | 4.678455708   | -11.626507932 |
| N399 | -1.256053939  | 6.571737021   | -12.179574907 |
| N400 | 6.734941080   | 4.255008074   | 6.283617221   |
| N401 | 9.075091194   | 4.014503093   | 0.053297346   |
| N402 | 9.372183122   | 1.879105214   | -2.775474130  |
| N403 | 7.245984084   | 0.825365724   | -4.253518936  |
| N404 | 3.754900521   | -1.235523774  | -7.030018816  |
| N405 | 5.668921923   | -1.569165618  | -8.336329343  |
| N406 | 4.123648420   | 0.056046697   | -8.925072700  |
| N407 | 4.883033084   | 2.362702963   | -3.666889292  |
| N408 | 5.809163240   | 4.920028787   | -4.350987500  |
| N409 | 6.683568496   | 5.625341929   | -6.960538187  |
| N410 | 6.294316801   | 2.573016778   | -8.171142397  |
| N411 | 5.052014047   | 6.744466163   | -8.891991299  |
| N412 | 4.490337724   | -10.886203188 | 2.776795287   |
| N413 | 3.472342359   | -7.891444756  | 0.998438069   |
| N414 | 4.060548040   | -6.009518324  | -1.337760427  |
| N415 | 6.691239887   | -4.892440401  | -1.101224186  |
| N416 | 1.425621547   | -10.345918700 | -2.384731155  |
| N417 | 0.597478197   | -8.312536598  | -4.156178498  |
| N418 | 3.354122834   | -8.119522560  | 8.380739202   |
| N419 | 0.922433942   | -6.297887615  | 5.258748078   |
| N420 | 0.628067328   | -8.442154044  | 4.807059808   |
| N421 | 2.559454005   | -5.729754991  | 10.382390213  |
| O422 | -8.025270757  | -1.589569274  | -1.254669888  |
| O423 | -8.365226235  | 1.819458856   | -2.695330712  |
| O424 | -10.102486323 | 2.775595218   | 0.477336585   |
| O425 | -6.842210173  | 2.025936840   | 2.151777599   |
| O426 | -4.730414986  | 3.909206406   | 0.109686570   |
| O427 | -6.800888437  | 6.872166987   | 0.450039871   |
| O428 | -8.077792506  | 6.598129692   | 4.266162946   |
| O429 | -4.525451936  | 3.998724079   | 5.933518554   |
| O430 | -1.650282950  | 6.032148570   | 3.575381478   |
| O431 | -2.568707768  | 9.291272833   | 2.211635139   |
| O432 | -5.050121048  | 10.964916472  | 4.146701777   |
| O433 | -2.689404796  | -2.539739005  | 12.066353018  |
| O434 | -1.545573811  | 1.896171259   | 12.208886619  |
| O435 | 3.237024842   | 2.458077092   | 12.748241477  |
| O436 | -4.257902181  | -0.457974783  | -3.812226209  |
| O437 | -4.724533820  | -5.324868177  | -0.819215536  |
| O438 | -2.783896678  | 0.657669035   | -6.952529890  |
| O439 | -0.988007471  | -1.806991756  | -7.777362480  |
| O440 | -6.229378005  | 2.421613406   | -7.534531275  |
| O441 | -4.352578698  | 4.462493997   | -3.785735431  |
| O442 | -1.086273110  | 5.737496896   | -5.239142322  |
| O443 | -1.672556577  | 7.832685867   | -7.901435222  |
| O444 | 4.912454817   | 4.254299922   | 9.277547237   |
| O445 | 3.818048346   | 6.048513113   | 0.840256665   |
| O446 | 8.201213009   | 3.835848337   | -2.765372344  |
| O447 | 8.187678764   | 1.570652420   | -6.216196898  |
| O448 | 4.237338144   | 1.832628916   | -5.798894787  |
| O449 | 3.649449271   | 5.633514940   | -4.634417817  |
| O450 | 4.601967935   | 4.462919307   | -1.481739135  |
| O451 | 7.507746155   | 7.614972020   | -6.186031571  |
| O452 | 6.800998566   | 7.050966928   | -10.321943447 |
| O453 | 5.697064720   | 3.681919349   | -10.077318702 |
| O454 | 3.859446642   | 9.408672076   | -10.973219304 |
| O455 | 1.462442687   | 1.557725670   | -8.761644574  |
| O456 | 2.384646339   | -9.892490259  | 1.279243569   |
| O457 | 2.980998092   | -7.777002744  | -2.315572074  |
| O458 | 6.958930286   | -5.067480474  | -3.363923288  |
| O459 | 10.261776891  | -5.058406986  | -0.462859779  |
| O460 | -1.404242521  | -9.385056529  | -4.348965673  |

|                   |        |              |                                         |              |
|-------------------|--------|--------------|-----------------------------------------|--------------|
|                   | O461   | -2.277354993 | -9.558548288                            | 1.554793153  |
|                   | O462   | -0.105504617 | -9.413617195                            | 2.058235980  |
|                   | O463   | 1.931046206  | -6.241501571                            | -6.708973585 |
|                   | O464   | 4.635140943  | -5.406905929                            | 9.535514299  |
|                   | O465   | 4.857369703  | -4.722180310                            | 12.947229313 |
|                   | O466   | -3.616702506 | -2.784437563                            | 3.458818411  |
|                   | O467   | -5.035623040 | -3.251767553                            | 5.108234184  |
|                   | O468   | -2.650599021 | -7.516117523                            | 9.150294780  |
|                   | O469   | -3.862119154 | -7.740378170                            | 7.255862895  |
|                   | O470   | 0.334794767  | -3.616146015                            | 6.937538005  |
|                   | O471   | -1.378267099 | -3.072694857                            | 8.296331777  |
|                   | O472   | -1.230648101 | -4.376129960                            | 4.957960252  |
|                   | O473   | 1.521088501  | -1.772596319                            | 10.918395335 |
|                   | O474   | 1.919234070  | -1.599635997                            | 8.113358578  |
|                   | O475   | 1.072033232  | -0.238579568                            | -6.880749014 |
|                   | O476   | -0.717484701 | -6.490238055                            | 11.352523345 |
|                   | O477   | -0.503490296 | -3.692969170                            | 10.748091879 |
|                   | S478   | 6.519064051  | 0.948621685                             | -0.996061664 |
|                   | S479   | 3.950175913  | -1.769321016                            | -0.694464103 |
|                   | S480   | 0.721545234  | -4.540331469                            | 2.421285078  |
|                   | S481   | 3.575254528  | 1.141086109                             | 1.513513455  |
|                   | S482   | 0.513091092  | -1.396563919                            | 0.473937566  |
|                   | S483   | 4.535747799  | -4.834506749                            | 1.651885924  |
|                   | S484   | 0.505859147  | -1.562757480                            | 4.684663432  |
|                   | S485   | 6.118097964  | -1.430044114                            | 2.070136996  |
|                   | S486   | 3.182508751  | -4.038048185                            | 5.108241489  |
|                   | S487   | 3.971293470  | -0.292234012                            | 5.116855785  |
| <b>17 (S=3/2)</b> |        |              | <b>bm1s2b266h2x2n2xconexandtf.car_3</b> |              |
| Fe(139)           | 1.775  | C1           | -9.570773097                            | 1.682355187  |
| Fe(140)           | 0.092  | C2           | -8.429622141                            | 2.689095700  |
| Fe(141)           | 2.741  | C3           | -7.614039137                            | 4.962415153  |
| Fe(142)           | -2.684 | C4           | -7.156532486                            | 5.392928385  |
| Fe(143)           | 3.182  | C5           | -7.694133011                            | 5.657412188  |
| Fe(144)           | -2.482 | C6           | -6.708937940                            | 4.659967656  |
| Fe(145)           | -0.087 | C7           | -5.874494062                            | 2.357916030  |
|                   |        | C8           | -4.501347265                            | 2.532796241  |
|                   |        | C9           | -3.249332539                            | 3.128809446  |
|                   |        | C10          | -2.484044672                            | 4.321860456  |
|                   |        | C11          | -2.563200240                            | 6.585674730  |
|                   |        | C12          | -2.071864519                            | 6.421774804  |
|                   |        | C13          | -2.650703309                            | 5.758920979  |
|                   |        | C14          | -1.822688247                            | 4.569080515  |
|                   |        | C15          | -1.327587395                            | 2.173122685  |
|                   |        | C16          | -0.203638953                            | 1.615214704  |
|                   |        | C17          | 0.938260768                             | 1.766146985  |
|                   |        | C18          | 2.049271077                             | 2.808837358  |
|                   |        | C19          | 0.221702189                             | 1.311068702  |
|                   |        | C20          | 1.215022156                             | 0.941033533  |
|                   |        | C21          | -0.725096013                            | 0.140785189  |
|                   |        | C22          | 2.609814721                             | 5.126919030  |
|                   |        | C23          | 2.962980075                             | 5.829870915  |
|                   |        | C24          | 2.123194311                             | 6.114134475  |
|                   |        | C25          | 3.069391861                             | 7.315659021  |
|                   |        | C26          | 1.983236495                             | 5.407381120  |
|                   |        | C27          | 2.226881462                             | 7.021202642  |
|                   |        | C28          | 3.119848305                             | 6.221423931  |
|                   |        | C29          | -1.481613328                            | -7.231757765 |
|                   |        | C30          | -0.503454447                            | -7.371841933 |
|                   |        | C31          | 1.357387700                             | -6.205184201 |
|                   |        | C32          | 2.727796005                             | -6.412382158 |
|                   |        | C33          | 1.291667616                             | -4.833560329 |
|                   |        | C34          | 2.295643413                             | -4.710228578 |
|                   |        | C35          | 2.199658083                             | -3.366185632 |
|                   |        | C36          | 3.491559511                             | -2.287062141 |
|                   |        | C37          | 4.898285325                             | -7.531053720 |
|                   |        | C38          | 6.009191021                             | -6.818516226 |
|                   |        | C39          | -5.847850791                            | 1.463066196  |
|                   |        | C40          | -5.118427926                            | 2.635969702  |
|                   |        | C41          | -4.777642387                            | 0.471128670  |
|                   |        | C42          | -5.173626338                            | -0.415551087 |
|                   |        | C43          | -6.005045862                            | -1.651359361 |
|                   |        | C44          | -4.286171034                            | 3.477088878  |
|                   |        | C45          | -4.493719497                            | 4.973355084  |
|                   |        | C46          | -4.500927801                            | 3.094773809  |
|                   |        | C47          | -6.029288269                            | 6.761400870  |
|                   |        | C48          | -5.300525159                            | 7.306932818  |
|                   |        | C49          | -3.935242155                            | 6.771545336  |
|                   |        | C50          | -2.422215346                            | 6.600648922  |
|                   |        | C51          | -0.546257098                            | 5.989648029  |

|      |              |               |              |
|------|--------------|---------------|--------------|
| C52  | 0.084653061  | 7.355841600   | -1.350065956 |
| C53  | -0.255069630 | 5.076457785   | -2.213520147 |
| C54  | -0.675099630 | 3.645529258   | -2.101005838 |
| C55  | -0.991628377 | 2.871339794   | -1.007433325 |
| C56  | -1.065719927 | 1.638955648   | -2.847766771 |
| C57  | -0.208006070 | 9.375998399   | -2.729532495 |
| C58  | 0.367510104  | 10.298486202  | -1.656602809 |
| C59  | -1.396390915 | 10.053357516  | -3.446982481 |
| C60  | -1.063939703 | 11.077875732  | -4.491838886 |
| C61  | 0.005231214  | 11.944624213  | -4.607764072 |
| C62  | -1.401876155 | 12.219886332  | -6.298307636 |
| C63  | 8.576896392  | -3.001174524  | 3.850796806  |
| C64  | 8.501859261  | -4.322241102  | 4.591170552  |
| C65  | 7.120344699  | -2.544413888  | 3.587461602  |
| C66  | 7.042673574  | -1.203874146  | 2.896952333  |
| C67  | 7.058327064  | -0.003381973  | 3.630224026  |
| C68  | 6.949135797  | -1.120421555  | 1.497403622  |
| C69  | 6.974134989  | 1.239468889   | 2.991827582  |
| C70  | 6.874844959  | 0.111261000   | 0.845514467  |
| C71  | 6.882294106  | 1.290073885   | 1.594350448  |
| C72  | 8.080982138  | -0.588074260  | -4.136572550 |
| C73  | 7.808866559  | 0.428713539   | -5.252745885 |
| C74  | 6.922271684  | -0.578877698  | -3.129690619 |
| C75  | 7.231373387  | 0.740259714   | -7.625227692 |
| C76  | 5.813334018  | 1.314661163   | -7.669092211 |
| C77  | 3.563413573  | 1.311699118   | -6.643025946 |
| C78  | 3.497952129  | 2.463144970   | -5.614191554 |
| C79  | 2.617472729  | 0.144834681   | -6.301503105 |
| C80  | 1.127560829  | 0.468906363   | -6.147330458 |
| C81  | 0.356420313  | 0.806767623   | -7.435004123 |
| C82  | 0.791072533  | 2.862299954   | -8.799401885 |
| C83  | 4.205337574  | 3.367379656   | -3.462197320 |
| C84  | 5.188258679  | 4.519119329   | -3.752080828 |
| C85  | 4.478751285  | 2.842248680   | -2.046586720 |
| C86  | 7.453635722  | 5.079206132   | -4.490317442 |
| C87  | 7.657300235  | 6.020131634   | -5.674607051 |
| C88  | 6.859120180  | 6.811485511   | -7.858597975 |
| C89  | 6.392319759  | 8.279165157   | -7.768863433 |
| C90  | 6.209325598  | 6.100782670   | -9.065344794 |
| C91  | 4.694944133  | 5.988951604   | -8.918439225 |
| C92  | 4.970035803  | 9.900569174   | -6.602411832 |
| C93  | 6.008750883  | 10.984567667  | -6.342845082 |
| C94  | 3.923344192  | 9.891764556   | -5.455183616 |
| C95  | 2.799880849  | 8.914187732   | -5.713140694 |
| C96  | 1.700141685  | 9.277927485   | -6.504346526 |
| C97  | 2.849596185  | 7.602629734   | -5.211440745 |
| C98  | 0.686317872  | 8.362658590   | -6.800028335 |
| C99  | 1.858121775  | 6.665697408   | -5.518650506 |
| C100 | 0.783244386  | 7.057173179   | -6.315248155 |
| C101 | -1.649380422 | -9.762612178  | -4.051453492 |
| C102 | -2.492476988 | -8.509242285  | -4.216701355 |
| C103 | -2.445647539 | -6.034727973  | -4.294785756 |
| C104 | -2.118571023 | -5.229556980  | -5.560438552 |
| C105 | -0.353562602 | -4.032479872  | -6.767996000 |
| C106 | 1.069089066  | -4.320776163  | -7.244795750 |
| C107 | 3.305204587  | -5.191640222  | -6.767754613 |
| C108 | 3.560647882  | -6.465616839  | -7.548943035 |
| C109 | -6.604160369 | -5.470449458  | -5.736247673 |
| C110 | -6.691021163 | -4.005029619  | -6.184148969 |
| C111 | -6.403336846 | -5.566572522  | -4.204241224 |
| C112 | -6.750803766 | -6.982207540  | -3.707160783 |
| C113 | -6.319017336 | -7.212476884  | -2.275198655 |
| C114 | -5.534329303 | -2.029397047  | -7.051320293 |
| C115 | -4.537937456 | -1.856837850  | -8.182646805 |
| C116 | -5.393201869 | -0.992950857  | -5.906926385 |
| C117 | -4.325192876 | -1.404202395  | -4.931076495 |
| C118 | -2.965358704 | -1.177436063  | -5.201965470 |
| C119 | -4.671298265 | -2.157555618  | -3.798501150 |
| C120 | -1.979852555 | -1.753869096  | -4.395928882 |
| C121 | -3.686201429 | -2.734496007  | -2.992419694 |
| C122 | -2.337838034 | -2.557606117  | -3.310961038 |
| C123 | 0.453161920  | -10.858515001 | 1.684591296  |
| C124 | 1.552471736  | -11.182598762 | 2.710329926  |
| C125 | -0.597088192 | -9.885647060  | 2.243185762  |
| C126 | -1.573686276 | -9.327078404  | 1.252996118  |
| C127 | -2.578502031 | -10.003046028 | 0.590101257  |
| C128 | -2.723351668 | -7.845490612  | 0.130714468  |
| C129 | 2.197021042  | -11.696229117 | 4.997648588  |
| C130 | 3.045433837  | -12.883392319 | 4.599414306  |
| C131 | -3.406088777 | -3.628192732  | 4.371773097  |

|       |               |              |              |
|-------|---------------|--------------|--------------|
| C132  | -2.219203576  | -4.467709986 | 4.744171104  |
| C133  | -2.232111258  | -5.869781584 | 3.996471161  |
| C134  | -3.448539190  | -6.708654179 | 4.493522919  |
| C135  | -3.414480254  | -8.154053949 | 3.969861633  |
| C136  | -4.415563036  | -9.067809325 | 4.617425378  |
| C137  | -0.953545917  | -6.628994750 | 4.462730366  |
| C138  | 1.576080600   | -3.902150100 | -0.572518892 |
| Fe139 | 0.492832777   | -5.451371151 | -0.976435440 |
| Fe140 | 1.588142691   | -1.805698794 | -0.632112211 |
| Fe141 | 3.576953146   | -3.827530449 | -0.465772993 |
| Fe142 | 2.000931410   | -4.023159132 | -2.499996869 |
| Fe143 | 3.845380515   | -2.087888206 | -2.536523419 |
| Fe144 | 2.074022245   | -5.176440321 | 0.990808073  |
| Fe145 | -0.034976284  | -3.335561838 | 0.793679750  |
| H146  | -8.621049626  | 0.087513671  | 2.895338919  |
| H147  | -8.618470099  | 0.041384342  | 1.257721623  |
| H148  | -9.484121042  | 4.106374266  | 1.185279717  |
| H149  | -10.108665361 | 1.903654773  | 1.113969772  |
| H150  | -10.283896107 | 1.877279112  | 2.869030774  |
| H151  | -6.714856588  | 4.612945002  | 1.238290193  |
| H152  | -9.012910422  | 5.008745877  | 3.947280476  |
| H153  | -7.992653623  | 5.847510456  | 1.237599362  |
| H154  | -8.602847377  | 5.687395582  | 6.137996126  |
| H155  | -7.445218664  | 3.159387395  | 4.947814488  |
| H156  | -7.215354406  | 6.644338238  | 5.562027243  |
| H157  | -2.577115426  | 2.262230261  | 3.522347279  |
| H158  | -5.380921723  | 2.874145493  | 3.650499510  |
| H159  | -6.280487510  | 1.370350815  | 5.886771913  |
| H160  | -1.692753612  | 6.845696954  | 4.319493304  |
| H161  | -4.218131724  | 5.448418774  | 4.156672932  |
| H162  | -5.719058389  | 2.397952990  | 7.229193173  |
| H163  | -3.482399623  | 3.330111243  | 2.422453498  |
| H164  | -3.862352703  | 5.537562846  | 6.919012273  |
| H165  | -3.272686375  | 7.423856308  | 4.904230742  |
| H166  | -1.485026626  | 0.405534379  | 5.604778681  |
| H167  | -1.248184087  | -0.164976415 | 3.936885656  |
| H168  | -0.163462955  | -0.733707603 | 5.222740369  |
| H169  | -0.378594059  | 2.165994559  | 4.212616303  |
| H170  | -3.611373725  | 5.738226485  | 9.201059250  |
| H171  | 1.262681601   | 4.578544538  | 2.604213789  |
| H172  | 0.964645626   | 6.267869493  | 6.773533303  |
| H173  | 3.118151533   | 7.897846429  | 4.739121993  |
| H174  | 0.676402258   | 0.657626995  | 2.543126311  |
| H175  | 1.829957738   | 0.080978175  | 3.757562188  |
| H176  | 9.048482121   | -2.262513987 | 4.526438927  |
| H177  | 1.640161560   | 6.120860162  | 1.805483191  |
| H178  | 2.725968077   | 7.986087507  | 3.007165625  |
| H179  | 2.955330563   | 5.002810500  | 2.242826306  |
| H180  | 4.090944889   | 6.988129242  | 3.559578644  |
| H181  | 1.128926852   | 6.489406190  | 4.227568081  |
| H182  | 3.555627414   | 4.671307793  | 4.682554215  |
| H183  | 0.671139576   | 4.200475711  | 4.956410910  |
| H184  | 1.888813215   | 1.772276929  | 3.203152022  |
| H185  | 3.863504693   | 1.942885764  | -1.872956141 |
| H186  | 4.157871995   | 3.627709855  | -1.343125170 |
| H187  | 6.066824661   | 2.516515874  | -0.935027436 |
| H188  | 6.729601786   | 3.224064072  | 1.528086264  |
| H189  | 6.762988762   | 0.158543822  | -0.237549393 |
| H190  | 6.886610572   | -2.034725461 | 0.904125524  |
| H191  | 7.126905698   | -0.035917514 | 4.721465997  |
| H192  | -0.666325038  | 2.974126564  | 6.609297920  |
| H193  | -2.079833197  | 1.375606166  | 9.034408667  |
| H194  | -0.901166140  | 2.357730514  | 9.930581708  |
| H195  | -2.654611013  | 3.320565040  | 7.729767527  |
| H196  | -2.108138396  | 6.663258869  | 8.967618568  |
| H197  | 6.969544303   | 2.163126805  | 3.577587127  |
| H198  | 1.445362939   | 0.903293977  | 6.314853397  |
| H199  | 2.691342914   | 8.004131470  | 8.137540901  |
| H200  | 1.271787698   | 7.186776150  | 8.842359925  |
| H201  | 3.045064778   | 5.114116816  | 9.137117908  |
| H202  | 5.098419512   | -8.613556849 | 9.416472405  |
| H203  | -6.188570946  | -3.620742261 | 1.249593722  |
| H204  | -4.362037141  | -4.417006962 | 5.848068546  |
| H205  | -7.840486135  | -7.121733205 | -3.755542005 |
| H206  | -6.279712892  | -7.732772059 | -4.358180861 |
| H207  | -7.052839045  | -4.835175025 | -3.698364415 |
| H208  | -4.383476771  | -2.770625262 | -8.804668685 |
| H209  | -7.621133053  | -5.845000892 | -5.937185371 |
| H210  | -4.435719626  | -0.147209089 | -0.978436536 |
| H211  | -5.752444630  | 0.182572693  | 1.789821624  |

|      |              |               |               |
|------|--------------|---------------|---------------|
| H212 | -4.653537444 | -3.922846221  | -6.546560100  |
| H213 | -6.519511334 | -1.856447725  | -7.529938786  |
| H214 | -4.709585199 | -6.023544120  | -6.395573812  |
| H215 | -4.874304466 | -2.798030412  | 2.076142244   |
| H216 | -5.366224323 | -5.299503239  | -3.951167610  |
| H217 | -5.809559635 | -7.249531494  | -6.375523702  |
| H218 | -7.663837738 | 1.336291632   | -1.604005350  |
| H219 | -3.917553405 | 1.071865776   | 0.198396027   |
| H220 | -4.687454775 | -8.065100884  | -2.984236963  |
| H221 | -4.255914817 | -0.725750144  | 1.584334148   |
| H222 | -0.040686100 | 5.628785477   | -0.106680234  |
| H223 | -1.057276542 | 3.092457094   | 0.051646173   |
| H224 | -4.112912048 | 7.834543275   | 0.828891061   |
| H225 | -4.816257178 | 5.384937152   | -0.729670391  |
| H226 | -1.662266242 | 7.868570866   | -2.300005457  |
| H227 | 0.886712489  | 12.100679348  | -3.996581718  |
| H228 | -0.164657288 | 10.237966679  | -0.676601165  |
| H229 | -2.075914547 | 10.482935579  | -2.688900905  |
| H230 | 0.590510304  | 9.138005345   | -3.451682606  |
| H231 | -1.818512564 | 12.622697046  | -7.218232324  |
| H232 | 0.833239716  | 5.118953654   | -2.386665707  |
| H233 | -0.729026415 | 5.508789708   | -3.109251278  |
| H234 | 0.378266952  | 13.380712984  | -6.150507470  |
| H235 | -1.970064022 | 9.261588010   | -3.954640687  |
| H236 | -2.637654980 | 5.853674905   | -1.482473207  |
| H237 | -4.236047093 | 6.207562901   | 1.510608265   |
| H238 | -5.753737399 | 7.422640265   | -3.427127920  |
| H239 | -1.205041274 | 0.766351880   | -3.478472546  |
| H240 | -7.109858479 | 6.862202030   | -2.428716442  |
| H241 | -1.410713314 | 0.758047646   | -0.971269686  |
| H242 | 10.300839298 | -3.248417114  | 2.767555270   |
| H243 | 9.147396874  | -2.395896217  | 1.980473513   |
| H244 | 4.620597916  | 1.383183357   | -4.230302868  |
| H245 | 3.204871645  | 3.822701675   | -3.463002700  |
| H246 | 6.472457768  | 3.222895393   | -4.695272361  |
| H247 | -0.871600621 | 3.448470172   | -4.820455478  |
| H248 | -2.836585325 | 3.830795598   | -5.780413278  |
| H249 | -0.737412382 | 4.700560616   | -5.815193341  |
| H250 | -0.934821332 | 6.537346200   | -7.068309707  |
| H251 | -4.207952736 | 2.032827821   | -5.089885028  |
| H252 | -5.576162286 | 3.171429322   | -5.209441024  |
| H253 | 6.680985802  | 5.114299953   | -9.187003436  |
| H254 | 6.422938530  | 6.703712452   | -9.957876525  |
| H255 | 4.809790523  | 3.935888149   | -8.441358761  |
| H256 | 3.242547084  | 4.693115147   | -8.286568899  |
| H257 | 1.619748217  | 2.696957659   | -10.665974421 |
| H258 | -0.687827091 | 0.471999494   | -7.341830273  |
| H259 | -0.169897391 | 8.666024156   | -7.408369488  |
| H260 | 3.668808971  | 7.286507814   | -4.558526605  |
| H261 | 0.540977223  | 4.748314487   | -8.009255447  |
| H262 | 2.950780182  | -0.315909442  | -5.358243350  |
| H263 | 5.244466856  | 0.117722162   | -6.090300524  |
| H264 | 0.974096782  | 1.270807410   | -5.408150665  |
| H265 | -6.469538899 | 4.670502289   | -2.812206246  |
| H266 | 7.388661648  | 0.162660895   | -8.546412095  |
| H267 | -5.635956687 | 1.815927822   | -3.058827159  |
| H268 | 2.744284211  | -0.619534213  | -7.086240754  |
| H269 | 1.945052963  | 5.635000333   | -5.171710295  |
| H270 | 7.912805053  | 1.602336636   | -7.649624120  |
| H271 | 0.974535040  | 1.221649906   | -10.031999703 |
| H272 | 0.853964430  | 4.692961337   | -9.702475119  |
| H273 | -6.985158909 | -0.124337894  | -1.224835432  |
| H274 | -6.335930080 | 1.906389839   | 0.243732130   |
| H275 | 1.623110217  | 10.295022780  | -6.894674144  |
| H276 | -3.232680445 | 3.300727289   | -3.228425997  |
| H277 | 3.279231380  | 1.767212124   | -7.600583818  |
| H278 | 0.786518437  | 0.261600416   | -8.285398809  |
| H279 | 0.665228920  | -0.428293289  | -5.708797534  |
| H280 | -0.123197256 | 2.838100775   | -6.986467146  |
| H281 | 7.426243748  | 5.712245271   | -3.590789168  |
| H282 | 5.921167611  | 5.365975310   | -6.552704136  |
| H283 | 7.941761116  | 6.872293384   | -8.041884733  |
| H284 | 8.352912646  | 4.450512870   | -4.432936894  |
| H285 | 5.327090010  | 7.851959969   | -6.080391684  |
| H286 | -0.668102547 | -9.618534509  | -4.526566752  |
| H287 | -1.464114474 | -9.850915153  | -2.960327983  |
| H288 | 0.973710258  | -10.371688196 | 0.846991457   |
| H289 | -1.881800792 | -11.771912241 | -4.299559088  |
| H290 | -3.290623822 | -10.934622992 | -4.292241401  |
| H291 | 7.103541877  | -1.359896336  | -2.380622113  |



|       |              |               |              |
|-------|--------------|---------------|--------------|
| H292  | 9.321458128  | 0.679902013   | -3.128962530 |
| H293  | 7.486832495  | -1.104925839  | -6.580028130 |
| H294  | 6.883275785  | 0.401901547   | -2.634367278 |
| H295  | 10.122718588 | -0.384156873  | -4.077180704 |
| H296  | 3.903161558  | -5.218344649  | -5.842460514 |
| H297  | 8.161982142  | -1.595436941  | -4.574396653 |
| H298  | 1.459902255  | -4.045493628  | 8.945791019  |
| H299  | 1.180835454  | -6.994392971  | 8.149624297  |
| H300  | 1.624692256  | -5.254320041  | -5.465111441 |
| H301  | 4.233672071  | -1.556306588  | 2.714308990  |
| H302  | -1.026597642 | -4.200693909  | -7.617489949 |
| H303  | -3.967358604 | -3.332864742  | -2.122429783 |
| H304  | -0.388674636 | -2.951285691  | -6.547672807 |
| H305  | 2.538138687  | -2.565049489  | 7.000946351  |
| H306  | -0.262733631 | -4.920062674  | -4.779532201 |
| H307  | 1.152024082  | -3.149113918  | 6.056669711  |
| H308  | 0.267863276  | -4.712096628  | 7.805064071  |
| H309  | 2.116566352  | -5.514195286  | 6.316648541  |
| H310  | 3.325503651  | -4.837009615  | 7.412531274  |
| H311  | -6.365706749 | -0.923499379  | -5.398870845 |
| H312  | 0.211606584  | -5.581429504  | 10.606182577 |
| H313  | -2.474356711 | -7.080889268  | 10.790191515 |
| H314  | -1.564508597 | -3.039088279  | -2.715505345 |
| H315  | -0.552760310 | -6.396913646  | 12.878584134 |
| H316  | -2.032469100 | -5.764199396  | 12.574749650 |
| H317  | 2.831649966  | -4.184383815  | 4.499861823  |
| H318  | -0.918946227 | -1.594245285  | -4.600907438 |
| H319  | -5.727303606 | -2.312124674  | -3.560989788 |
| H320  | -0.968855753 | -10.628726688 | 6.433702976  |
| H321  | -1.175432342 | -10.403795358 | 3.029172960  |
| H322  | -0.156922733 | -8.326593234  | 6.248417472  |
| H323  | -2.349023471 | -11.034764359 | 5.871347355  |
| H324  | 2.655583501  | -7.086367279  | -7.759528497 |
| H325  | 1.636633557  | -6.945935008  | 4.011793168  |
| H326  | -2.166088864 | -4.636808378  | 5.829980248  |
| H327  | -0.799612609 | -7.344638156  | -4.119182558 |
| H328  | -3.436702535 | -6.721931367  | 5.595037566  |
| H329  | -4.111728639 | -9.184732161  | -0.693467182 |
| H330  | -3.087988951 | -6.919526011  | -0.297778067 |
| H331  | -1.507762551 | -8.213180475  | 11.745435858 |
| H332  | 3.705185413  | -3.206911962  | 2.625703752  |
| H333  | 2.898970983  | -8.011915535  | 5.700102253  |
| H334  | 3.063741432  | -6.719679299  | 3.445127794  |
| H335  | 3.277388311  | -7.711773050  | 8.023121863  |
| H336  | 3.646328818  | -1.139916099  | 6.181202994  |
| H337  | -6.269995056 | -9.302507667  | 4.915403891  |
| H338  | -3.598917432 | -8.143746196  | 2.885034050  |
| H339  | -2.431012915 | -8.607545786  | 4.136863954  |
| H340  | -4.376546770 | -6.224187648  | 4.155701545  |
| H341  | -2.111257436 | -5.481360230  | -3.403382824 |
| H342  | -2.685814071 | -0.575602360  | -6.070566898 |
| H343  | -5.177120116 | -0.018714062  | -6.371194892 |
| H344  | -1.313758446 | -3.943612238  | 4.411789972  |
| H345  | 1.939926828  | -8.871918755  | 6.578593297  |
| H346  | -0.042645652 | -8.909851264  | 7.686722909  |
| H347  | 4.134712084  | -0.354268920  | 4.736351383  |
| H348  | -2.835331627 | -11.056219508 | 0.573385869  |
| H349  | -0.084908511 | -9.048338429  | 2.731499770  |
| H350  | -3.527319461 | -6.182481018  | -4.254823956 |
| H351  | 3.665360583  | -4.343615524  | -7.371633420 |
| H352  | 6.606378672  | -2.501097322  | 4.559927809  |
| H353  | 6.615974075  | -3.310981587  | 2.978077320  |
| H354  | 0.554899333  | -12.676868307 | 0.740053828  |
| H355  | -0.543891899 | -12.638469258 | 1.951362138  |
| H356  | 1.681671983  | -11.966404143 | 5.932378057  |
| H357  | 0.223646748  | -11.247046572 | 4.325873895  |
| H358  | 2.543662088  | -13.619287429 | 3.926474875  |
| H359  | 2.846421809  | -10.832675160 | 5.211684628  |
| H360  | 8.314668034  | -5.203537999  | 3.931437876  |
| H361  | 6.963971851  | 10.625247025  | -5.892762951 |
| H362  | 4.939544127  | -7.187810247  | 10.470444004 |
| H363  | 5.690030030  | -5.938958198  | 8.069141109  |
| H364  | 4.462663306  | 10.152435925  | -7.548362949 |
| H365  | 4.430404055  | 9.648712045   | -4.508021745 |
| H366  | 3.532524032  | 10.915580812  | -5.364204270 |
| H367  | -0.858297381 | -0.748603040  | 0.356892241  |
| H368  | -0.796190941 | -2.428207899  | 1.954204610  |
| H369  | -1.367344756 | -2.989817303  | 1.744589608  |
| H370  | 1.153700032  | -2.138722216  | 1.012712689  |
| Mo371 | -0.471406176 | -5.986571057  | 1.524057788  |

|      |              |               |              |
|------|--------------|---------------|--------------|
| N372 | -9.195478087 | 0.277622990   | 2.070300326  |
| N373 | -8.655529953 | 3.942717212   | 1.751745055  |
| N374 | -8.071472137 | 5.331913015   | 4.156386249  |
| N375 | -6.838578189 | 3.370177012   | 5.740038975  |
| N376 | -4.501435702 | 2.848957878   | 4.168844336  |
| N377 | -3.224812538 | 5.407634526   | 4.398123671  |
| N378 | -2.931332775 | 5.815401630   | 7.239011965  |
| N379 | -1.961760553 | 3.399078656   | 8.480646622  |
| N380 | -0.018004975 | 2.231294863   | 6.863362481  |
| N381 | 1.648431308  | 4.042743464   | 5.213426700  |
| N382 | 1.936386029  | 6.303014617   | 7.089646827  |
| N383 | -1.178778723 | -6.100496595  | 12.126669400 |
| N384 | 0.307787197  | -6.311625916  | 9.893388965  |
| N385 | 3.023949977  | -3.386802126  | 5.113469946  |
| N386 | 3.635526588  | -1.126684977  | 5.167293172  |
| N387 | 3.790822218  | -2.338813621  | 3.190329369  |
| N388 | 3.572288198  | -7.247542664  | 8.910613000  |
| N389 | -6.778755664 | 0.822259477   | -1.580012297 |
| N390 | -5.651716101 | -2.770723028  | 1.407393479  |
| N391 | -5.144773961 | 2.631136111   | -2.667007283 |
| N392 | -5.747448582 | 5.376883575   | -2.931349178 |
| N393 | -4.758161912 | 6.388737313   | -0.513686604 |
| N394 | -1.975895503 | 6.099630499   | -0.741510443 |
| N395 | -0.733445533 | 2.864241672   | -3.246108747 |
| N396 | -1.243176301 | 1.610270616   | -1.505399440 |
| N397 | -0.710890674 | 8.166056371   | -2.097679419 |
| N398 | -1.935624467 | 11.260179367  | -5.552811840 |
| N399 | -0.227050099 | 12.660916800  | -5.764608934 |
| N400 | 9.294433403  | -3.205538876  | 2.589806862  |
| N401 | 9.336958834  | -0.301514037  | -3.425247277 |
| N402 | 7.548089690  | -0.094679899  | -6.484594013 |
| N403 | 4.920166712  | 0.792912893   | -6.802516448 |
| N404 | 0.320177357  | 2.244760449   | -7.722277409 |
| N405 | 1.245669317  | 2.185921104   | -9.873233813 |
| N406 | 0.897977960  | 4.215032121   | -8.806109255 |
| N407 | 4.219338983  | 2.311346540   | -4.470460609 |
| N408 | 6.284942027  | 4.212616486   | -4.508360313 |
| N409 | 6.677577222  | 6.047926564   | -6.625957652 |
| N410 | 4.240876969  | 4.790575102   | -8.468783373 |
| N411 | 5.603259987  | 8.597269876   | -6.714649765 |
| N412 | -2.328142114 | -10.918440166 | -4.642559029 |
| N413 | -1.812976987 | -7.348670256  | -4.291163883 |
| N414 | -0.844706521 | -4.799404658  | -5.640142477 |
| N415 | 1.908793840  | -4.995327536  | -6.417884205 |
| N416 | -5.694681209 | -6.254195603  | -6.577033104 |
| N417 | -5.544246262 | -3.419745249  | -6.622838949 |
| N418 | -0.169573690 | -12.092934108 | 1.168266899  |
| N419 | -1.680451969 | -7.969879618  | 0.950491535  |
| N420 | -3.286514217 | -9.052750863  | -0.111283912 |
| N421 | 1.180622015  | -11.390093952 | 4.004506752  |
| N422 | 1.724090570  | 1.108788027   | -0.237437728 |
| N423 | 1.663438927  | -0.008607217  | -0.407383914 |
| O424 | -7.377364564 | 2.401487387   | 2.836825097  |
| O425 | -5.994920055 | 5.792029604   | 3.340700259  |
| O426 | -5.873197893 | 5.028722399   | 6.982900871  |
| O427 | -3.450980677 | 2.401971609   | 6.138277471  |
| O428 | -1.252841488 | 4.288355795   | 4.225640249  |
| O429 | -0.967306508 | 6.867445179   | 6.733382134  |
| O430 | -1.114631127 | 4.697512629   | 10.173424510 |
| O431 | 0.452995561  | 0.641840877   | 8.456968464  |
| O432 | 3.238490917  | 2.519790293   | 5.837856775  |
| O433 | 4.144000205  | 5.963848963   | 6.702089952  |
| O434 | 3.821725053  | 6.732756091   | 10.108624490 |
| O435 | -0.524953560 | -8.403963743  | 9.368425665  |
| O436 | 3.010210915  | -5.826671771  | 10.625761767 |
| O437 | 7.179411924  | -7.159682765  | 8.739875483  |
| O438 | -4.541183037 | 3.508464953   | -0.632755702 |
| O439 | -6.970950526 | -1.629250347  | -0.052145047 |
| O440 | -3.545373897 | 5.771602744   | -3.358376156 |
| O441 | -3.822856026 | 3.931928646   | -5.890715428 |
| O442 | -5.252943924 | 8.532616931   | -1.174594670 |
| O443 | -1.664732812 | 6.920427681   | 1.371841774  |
| O444 | 1.246282413  | 7.649175026   | -1.047221270 |
| O445 | 1.284553918  | 11.082934790  | -1.836793307 |
| O446 | 8.612260482  | -4.444481835  | 5.803037562  |
| O447 | 6.778801900  | 2.480617226   | 0.899439785  |
| O448 | 7.837107298  | 1.657171404   | -5.053134941 |
| O449 | 5.551234178  | 2.204007739   | -8.506258847 |
| O450 | 2.819467690  | 3.474331517   | -5.859504067 |
| O451 | 4.986368198  | 5.644674223   | -3.277369925 |

|                 |      |              |                                           |              |
|-----------------|------|--------------|-------------------------------------------|--------------|
|                 | O452 | 5.873840610  | 2.559942258                               | -1.894052640 |
|                 | O453 | 8.672373596  | 6.725564123                               | -5.736105378 |
|                 | O454 | 6.740904097  | 9.106927097                               | -8.622906517 |
|                 | O455 | 3.949709204  | 6.960052251                               | -9.126638252 |
|                 | O456 | 5.808024812  | 12.168236290                              | -6.564407284 |
|                 | O457 | -0.179842778 | 6.091976446                               | -6.637797750 |
|                 | O458 | -3.747883553 | -8.581440934                              | -4.237875147 |
|                 | O459 | -2.981031056 | -5.010065262                              | -6.440506101 |
|                 | O460 | 1.421052662  | -3.884438797                              | -8.353865954 |
|                 | O461 | 4.671167428  | -6.808230538                              | -7.922182296 |
|                 | O462 | -7.772096739 | -3.391230166                              | -6.144004869 |
|                 | O463 | -6.964046534 | -6.855760451                              | -1.299612474 |
|                 | O464 | -5.127148919 | -7.837046010                              | -2.106411308 |
|                 | O465 | -3.967005846 | -0.809820102                              | -8.450261288 |
|                 | O466 | 2.739344671  | -11.330987530                             | 2.363278627  |
|                 | O467 | 4.169131791  | -13.084895323                             | 5.038282654  |
|                 | O468 | -3.447237206 | -2.849703489                              | 3.426544730  |
|                 | O469 | -4.535032863 | -3.774850532                              | 5.132739012  |
|                 | O470 | -4.149304338 | -10.106499751                             | 5.217901401  |
|                 | O471 | -5.698129329 | -8.641241086                              | 4.469982971  |
|                 | O472 | -0.155294269 | -7.019556958                              | 3.523169616  |
|                 | O473 | -0.781948845 | -6.870339392                              | 5.681887015  |
|                 | O474 | -2.258632565 | -5.683269934                              | 2.634840777  |
|                 | O475 | 2.888045113  | -8.582812140                              | 6.509730219  |
|                 | O476 | 2.582655863  | -6.844691759                              | 4.287641100  |
|                 | O477 | -1.089877902 | 3.785867713                               | -5.759960209 |
|                 | O478 | -1.511253020 | -11.423260808                             | 6.197833035  |
|                 | O479 | 0.154694538  | -9.141355430                              | 6.743387701  |
|                 | S480 | 5.277522567  | -0.868868391                              | -3.921309459 |
|                 | S481 | 1.667183742  | -1.845960800                              | -3.021357547 |
|                 | S482 | -1.480711678 | -4.775759405                              | -0.220549552 |
|                 | S483 | 3.952008164  | -1.611846742                              | -0.257693564 |
|                 | S484 | -0.739197266 | -1.673808905                              | -0.640949067 |
|                 | S485 | 0.851913088  | -5.818045017                              | -3.154856103 |
|                 | S486 | 0.812917762  | -4.324793166                              | 2.628591080  |
|                 | S487 | 4.218497638  | -4.341620203                              | -2.604908409 |
|                 | S488 | 1.260660808  | -7.129353684                              | 0.319323114  |
|                 | S489 | 4.229189289  | -5.037128212                              | 1.304475878  |
| <b>18 (S=1)</b> |      |              | <b>bm22b2x6x2n22ndxtndteconexth.car_3</b> |              |
| Fe(139) 2.252   | C1   | -3.100       | 2.519                                     | -8.928       |
| Fe(140) -0.053  | C2   | -3.733       | 3.069                                     | -7.647       |
| Fe(141) 2.268   | C3   | -4.545       | 5.060                                     | -6.453       |
| Fe(142) -2.666  | C4   | -5.947       | 4.597                                     | -6.055       |
| Fe(143) 3.142   | C5   | -8.116       | 3.730                                     | -6.782       |
| Fe(144) -2.385  | C6   | -8.125       | 2.360                                     | -6.093       |
| Fe(145) -0.948  | C7   | -6.941       | 0.237                                     | -5.784       |
|                 | C8   | -6.415       | 0.414                                     | -4.357       |
|                 | C9   | -5.002       | 1.692                                     | -2.839       |
|                 | C10  | -6.104       | 2.168                                     | -1.882       |
|                 | C11  | -8.097       | 3.501                                     | -1.532       |
|                 | C12  | -9.141       | 2.419                                     | -1.216       |
|                 | C13  | -10.693      | 0.762                                     | -2.125       |
|                 | C14  | -10.389      | -0.639                                    | -1.574       |
|                 | C15  | -8.861       | -2.569                                    | -1.639       |
|                 | C16  | -7.740       | -2.768                                    | -0.615       |
|                 | C17  | -5.907       | -1.660                                    | 0.622        |
|                 | C18  | -6.197       | -0.995                                    | 1.978        |
|                 | C19  | -4.664       | -1.073                                    | -0.098       |
|                 | C20  | -3.500       | -0.790                                    | 0.854        |
|                 | C21  | -4.227       | -1.979                                    | -1.256       |
|                 | C22  | -7.054       | 1.015                                     | 3.140        |
|                 | C23  | -8.509       | 0.683                                     | 3.537        |
|                 | C24  | -6.821       | 2.537                                     | 2.979        |
|                 | C25  | -7.300       | 3.295                                     | 4.222        |
|                 | C26  | -5.343       | 2.844                                     | 2.703        |
|                 | C27  | -10.854      | 0.581                                     | 2.909        |
|                 | C28  | -11.058      | -0.792                                    | 3.518        |
|                 | C29  | -6.647       | -10.809                                   | -3.813       |
|                 | C30  | -5.572       | -10.672                                   | -2.734       |
|                 | C31  | -5.070       | -9.496                                    | -0.587       |
|                 | C32  | -5.625       | -10.132                                   | 0.701        |
|                 | C33  | -5.012       | -7.961                                    | -0.482       |
|                 | C34  | -4.183       | -7.443                                    | 0.697        |
|                 | C35  | -3.804       | -5.976                                    | 0.484        |
|                 | C36  | -3.360       | -4.482                                    | 2.437        |
|                 | C37  | -5.049       | -11.393                                   | 2.725        |
|                 | C38  | -4.550       | -10.662                                   | 3.954        |
|                 | C39  | -0.117       | 2.806                                     | -5.334       |
|                 | C40  | -0.031       | 3.930                                     | -4.292       |

|      |        |        |        |
|------|--------|--------|--------|
| C41  | 0.137  | 1.486  | -4.558 |
| C42  | -0.189 | 0.175  | -5.302 |
| C43  | 0.981  | -0.431 | -6.076 |
| C44  | 1.400  | 5.675  | -3.357 |
| C45  | 0.518  | 6.929  | -3.323 |
| C46  | 2.889  | 6.065  | -3.387 |
| C47  | -1.445 | 8.064  | -4.277 |
| C48  | -2.680 | 7.628  | -3.476 |
| C49  | -3.780 | 5.809  | -2.237 |
| C50  | -3.492 | 5.805  | -0.728 |
| C51  | -1.816 | 5.668  | 1.065  |
| C52  | -2.141 | 7.024  | 1.732  |
| C53  | -0.298 | 5.517  | 1.275  |
| C54  | 0.330  | 4.199  | 0.972  |
| C55  | -0.117 | 2.902  | 1.060  |
| C56  | 2.040  | 2.830  | 0.575  |
| C57  | -1.751 | 9.442  | 1.514  |
| C58  | -3.138 | 9.868  | 1.994  |
| C59  | -1.243 | 10.393 | 0.407  |
| C60  | -0.685 | 11.707 | 0.874  |
| C61  | -0.983 | 12.475 | 1.982  |
| C62  | 0.601  | 13.445 | 0.772  |
| C63  | -1.863 | -5.694 | 7.566  |
| C64  | -2.042 | -7.183 | 7.341  |
| C65  | -2.147 | -4.999 | 6.209  |
| C66  | -2.059 | -3.494 | 6.304  |
| C67  | -3.183 | -2.709 | 6.619  |
| C68  | -0.833 | -2.837 | 6.092  |
| C69  | -3.091 | -1.316 | 6.720  |
| C70  | -0.722 | -1.452 | 6.210  |
| C71  | -1.852 | -0.694 | 6.527  |
| C72  | 4.142  | -0.222 | 8.100  |
| C73  | 4.624  | 1.234  | 8.118  |
| C74  | 3.544  | -0.560 | 6.725  |
| C75  | 6.572  | 2.735  | 8.118  |
| C76  | 6.459  | 3.542  | 6.824  |
| C77  | 5.854  | 3.516  | 4.427  |
| C78  | 4.370  | 3.919  | 4.278  |
| C79  | 6.342  | 2.608  | 3.283  |
| C80  | 6.065  | 3.071  | 1.848  |
| C81  | 6.874  | 4.270  | 1.324  |
| C82  | 6.822  | 6.605  | 2.186  |
| C83  | 2.021  | 3.369  | 4.557  |
| C84  | 1.518  | 4.396  | 5.587  |
| C85  | 1.104  | 2.134  | 4.609  |
| C86  | 1.425  | 4.913  | 7.979  |
| C87  | 2.035  | 6.129  | 8.666  |
| C88  | 3.739  | 7.899  | 8.647  |
| C89  | 3.024  | 9.259  | 8.513  |
| C90  | 5.198  | 7.993  | 8.153  |
| C91  | 5.274  | 8.293  | 6.658  |
| C92  | 1.427  | 10.594 | 7.226  |
| C93  | 0.729  | 11.236 | 8.419  |
| C94  | 0.403  | 10.386 | 6.079  |
| C95  | 1.074  | 9.875  | 4.825  |
| C96  | 1.654  | 10.774 | 3.918  |
| C97  | 1.212  | 8.499  | 4.575  |
| C98  | 2.367  | 10.324 | 2.804  |
| C99  | 1.950  | 8.030  | 3.484  |
| C100 | 2.522  | 8.951  | 2.609  |
| C101 | 7.971  | -6.302 | -3.480 |
| C102 | 7.331  | -5.017 | -3.976 |
| C103 | 6.225  | -2.908 | -3.283 |
| C104 | 6.972  | -1.679 | -2.761 |
| C105 | 7.467  | -0.332 | -0.768 |
| C106 | 8.205  | -0.589 | 0.544  |
| C107 | 8.750  | -2.116 | 2.379  |
| C108 | 9.991  | -2.982 | 2.335  |
| C109 | 7.326  | -0.853 | -7.290 |
| C110 | 7.296  | 0.653  | -7.019 |
| C111 | 5.911  | -1.439 | -7.085 |
| C112 | 5.781  | -2.851 | -7.686 |
| C113 | 4.528  | -3.530 | -7.178 |
| C114 | 7.302  | 2.441  | -5.369 |
| C115 | 8.316  | 2.682  | -4.269 |
| C116 | 5.944  | 3.164  | -5.195 |
| C117 | 5.201  | 2.607  | -4.019 |
| C118 | 5.375  | 3.167  | -2.744 |
| C119 | 4.460  | 1.420  | -4.148 |
| C120 | 4.883  | 2.510  | -1.614 |

|  |       |         |         |        |
|--|-------|---------|---------|--------|
|  | C121  | 3.976   | 0.763   | -3.017 |
|  | C122  | 4.210   | 1.293   | -1.744 |
|  | C123  | 3.391   | -10.482 | -1.488 |
|  | C124  | 2.577   | -11.326 | -0.496 |
|  | C125  | 2.478   | -9.568  | -2.320 |
|  | C126  | 3.174   | -8.561  | -3.180 |
|  | C127  | 4.055   | -8.799  | -4.216 |
|  | C128  | 3.611   | -6.632  | -4.104 |
|  | C129  | 0.693   | -12.806 | -0.085 |
|  | C130  | 1.530   | -13.765 | 0.732  |
|  | C131  | -1.928  | -4.390  | -4.809 |
|  | C132  | -1.909  | -5.378  | -3.678 |
|  | C133  | -0.707  | -6.404  | -3.768 |
|  | C134  | -0.780  | -7.185  | -5.111 |
|  | C135  | 0.287   | -8.290  | -5.185 |
|  | C136  | 0.131   | -9.224  | -6.351 |
|  | C137  | -0.923  | -7.442  | -2.623 |
|  | C138  | 2.507   | -3.425  | 0.847  |
|  | Fe139 | 3.548   | -4.584  | -0.420 |
|  | Fe140 | 1.865   | -1.386  | 1.304  |
|  | Fe141 | 2.202   | -3.568  | 2.749  |
|  | Fe142 | 4.373   | -3.117  | 1.466  |
|  | Fe143 | 3.948   | -1.569  | 3.559  |
|  | Fe144 | 1.367   | -5.089  | 0.858  |
|  | Fe145 | 1.436   | -3.214  | -0.963 |
|  | H146  | -2.977  | 0.592   | -8.276 |
|  | H147  | -1.539  | 1.376   | -8.259 |
|  | H148  | -3.660  | 4.982   | -8.401 |
|  | H149  | -2.429  | 3.271   | -9.370 |
|  | H150  | -3.931  | 2.395   | -9.644 |
|  | H151  | -3.904  | 4.885   | -5.577 |
|  | H152  | -6.453  | 4.303   | -8.024 |
|  | H153  | -4.575  | 6.141   | -6.642 |
|  | H154  | -8.662  | 3.656   | -7.732 |
|  | H155  | -6.397  | 1.852   | -7.067 |
|  | H156  | -8.656  | 4.425   | -6.126 |
|  | H157  | -4.539  | 0.809   | -2.381 |
|  | H158  | -5.078  | 1.868   | -4.980 |
|  | H159  | -6.232  | -0.371  | -6.363 |
|  | H160  | -7.700  | 3.851   | -0.570 |
|  | H161  | -6.883  | 3.437   | -3.318 |
|  | H162  | -7.887  | -0.311  | -5.713 |
|  | H163  | -4.230  | 2.468   | -2.928 |
|  | H164  | -9.227  | 1.882   | -3.211 |
|  | H165  | -8.597  | 4.339   | -2.036 |
|  | H166  | -5.054  | -2.174  | -1.954 |
|  | H167  | -3.413  | -1.503  | -1.823 |
|  | H168  | -3.845  | -2.944  | -0.888 |
|  | H169  | -4.988  | -0.107  | -0.512 |
|  | H170  | -11.151 | 0.628   | -3.115 |
|  | H171  | -4.984  | 2.373   | 1.778  |
|  | H172  | -9.250  | 1.233   | 1.661  |
|  | H173  | -8.373  | 3.154   | 4.414  |
|  | H174  | -2.686  | -0.310  | 0.293  |
|  | H175  | -3.091  | -1.708  | 1.301  |
|  | H176  | -2.641  | -5.369  | 8.282  |
|  | H177  | -5.202  | 3.931   | 2.605  |
|  | H178  | -7.117  | 4.372   | 4.097  |
|  | H179  | -4.718  | 2.494   | 3.541  |
|  | H180  | -6.750  | 2.959   | 5.116  |
|  | H181  | -7.417  | 2.879   | 2.113  |
|  | H182  | -6.441  | 0.641   | 3.973  |
|  | H183  | -6.668  | 0.777   | 1.042  |
|  | H184  | -3.785  | -0.110  | 1.671  |
|  | H185  | 1.525   | 1.344   | 3.962  |
|  | H186  | 0.131   | 2.443   | 4.199  |
|  | H187  | 0.034   | 1.411   | 6.100  |
|  | H188  | -2.526  | 1.100   | 6.863  |
|  | H189  | 0.232   | -0.960  | 6.019  |
|  | H190  | 0.044   | -3.413  | 5.788  |
|  | H191  | -4.154  | -3.187  | 6.775  |
|  | H192  | -7.334  | -0.773  | -0.705 |
|  | H193  | -8.550  | -3.095  | -2.554 |
|  | H194  | -9.758  | -3.069  | -1.251 |
|  | H195  | -8.598  | -0.697  | -2.621 |
|  | H196  | -11.444 | 1.200   | -1.454 |
|  | H197  | -3.981  | -0.719  | 6.938  |
|  | H198  | -5.731  | -2.717  | 0.854  |
|  | H199  | -11.274 | 1.338   | 3.591  |
|  | H200  | -11.430 | 0.609   | 1.971  |

|      |         |         |        |
|------|---------|---------|--------|
| H201 | -10.317 | -1.564  | 3.201  |
| H202 | -4.686  | -12.432 | 2.751  |
| H203 | 1.803   | -2.244  | -6.590 |
| H204 | -3.133  | -5.581  | -5.735 |
| H205 | 5.713   | -2.776  | -8.781 |
| H206 | 6.665   | -3.455  | -7.435 |
| H207 | 5.157   | -0.785  | -7.550 |
| H208 | 9.051   | 1.854   | -4.128 |
| H209 | 7.578   | -0.931  | -8.358 |
| H210 | 1.190   | 1.478   | -4.231 |
| H211 | -1.014  | 0.334   | -6.018 |
| H212 | 7.257   | 0.336   | -4.960 |
| H213 | 7.776   | 2.913   | -6.256 |
| H214 | 8.177   | -1.558  | -5.537 |
| H215 | 0.380   | -2.352  | -5.565 |
| H216 | 5.691   | -1.453  | -6.006 |
| H217 | 8.553   | -2.445  | -6.869 |
| H218 | 0.407   | 3.411   | -7.242 |
| H219 | -0.480  | 1.523   | -3.649 |
| H220 | 5.656   | -4.499  | -5.894 |
| H221 | -0.566  | -0.561  | -4.579 |
| H222 | -2.375  | 4.902   | 1.622  |
| H223 | -1.100  | 2.504   | 1.290  |
| H224 | -4.680  | 6.416   | -2.386 |
| H225 | -1.950  | 5.683   | -3.319 |
| H226 | -1.592  | 7.951   | -0.017 |
| H227 | -1.678  | 12.333  | 2.803  |
| H228 | -3.971  | 9.499   | 1.349  |
| H229 | -2.050  | 10.554  | -0.330 |
| H230 | -1.065  | 9.461   | 2.376  |
| H231 | 1.337   | 14.185  | 0.471  |
| H232 | -0.113  | 5.745   | 2.340  |
| H233 | 0.215   | 6.300   | 0.696  |
| H234 | -0.108  | 14.337  | 2.570  |
| H235 | -0.431  | 9.876   | -0.130 |
| H236 | -1.505  | 5.335   | -1.039 |
| H237 | -4.012  | 4.780   | -2.547 |
| H238 | -1.078  | 8.993   | -3.819 |
| H239 | 3.028   | 2.447   | 0.358  |
| H240 | -1.762  | 8.297   | -5.302 |
| H241 | 1.080   | 1.031   | 0.966  |
| H242 | -0.396  | -5.712  | 8.993  |
| H243 | -0.293  | -4.442  | 7.968  |
| H244 | 3.707   | 2.063   | 4.953  |
| H245 | 1.884   | 3.851   | 3.578  |
| H246 | 2.751   | 3.588   | 7.006  |
| H247 | 2.365   | 4.912   | 0.566  |
| H248 | 3.661   | 6.312   | -0.607 |
| H249 | 3.392   | 6.980   | 0.791  |
| H250 | 3.503   | 5.154   | -3.365 |
| H251 | 3.119   | 6.627   | -4.308 |
| H252 | 5.716   | 7.058   | 8.411  |
| H253 | 5.680   | 8.821   | 8.692  |
| H254 | 5.948   | 6.342   | 6.236  |
| H255 | 5.607   | 7.382   | 4.858  |
| H256 | 8.477   | 7.338   | 3.148  |
| H257 | 7.030   | 4.169   | 0.240  |
| H258 | 2.805   | 11.038  | 2.103  |
| H259 | 0.737   | 7.760   | 5.227  |
| H260 | 5.124   | 7.777   | 2.200  |
| H261 | 5.873   | 1.619   | 3.408  |
| H262 | 5.878   | 1.862   | 5.782  |
| H263 | 4.990   | 3.262   | 1.707  |
| H264 | -0.364  | 6.392   | -5.069 |
| H265 | 7.638   | 2.637   | 8.364  |
| H266 | 1.684   | 4.471   | -5.183 |
| H267 | 7.425   | 2.459   | 3.413  |
| H268 | 2.104   | 6.959   | 3.347  |
| H269 | 2.463   | 7.460   | -2.096 |
| H270 | 6.101   | 3.349   | 8.898  |
| H271 | 8.770   | 5.908   | 2.211  |
| H272 | 6.586   | 8.585   | 2.589  |
| H273 | 1.276   | 2.099   | -6.669 |
| H274 | -1.169  | 2.796   | -5.673 |
| H275 | 1.558   | 11.849  | 4.084  |
| H276 | 1.209   | 5.185   | -2.387 |
| H277 | 6.407   | 4.464   | 4.426  |
| H278 | 7.870   | 4.253   | 1.782  |
| H279 | 6.322   | 2.218   | 1.204  |
| H280 | 5.305   | 5.738   | 1.163  |

|      |        |         |        |
|------|--------|---------|--------|
| H281 | 0.405  | 5.199   | 7.678  |
| H282 | 3.415  | 6.357   | 7.165  |
| H283 | 3.760  | 7.699   | 9.729  |
| H284 | 1.340  | 4.131   | 8.747  |
| H285 | 1.909  | 8.528   | 6.978  |
| H286 | 8.438  | -6.135  | -2.499 |
| H287 | 7.131  | -7.008  | -3.317 |
| H288 | 4.051  | -9.857  | -0.870 |
| H289 | 9.250  | -7.725  | -4.180 |
| H290 | 8.548  | -6.829  | -5.359 |
| H291 | 3.261  | -1.621  | 6.721  |
| H292 | 2.389  | 0.223   | 9.040  |
| H293 | 6.576  | 0.598   | 8.040  |
| H294 | 2.643  | 0.049   | 6.563  |
| H295 | 3.538  | -0.339  | 10.059 |
| H296 | 8.002  | -2.586  | 3.037  |
| H297 | 4.996  | -0.891  | 8.289  |
| H298 | -6.042 | -7.572  | -0.418 |
| H299 | -4.063 | -9.880  | -0.786 |
| H300 | 7.566  | -2.556  | 0.665  |
| H301 | -2.665 | -3.344  | 3.977  |
| H302 | 8.187  | 0.114   | -1.466 |
| H303 | 3.423  | -0.173  | -3.109 |
| H304 | 6.709  | 0.437   | -0.549 |
| H305 | -4.697 | -5.348  | 0.354  |
| H306 | 6.218  | -2.091  | -0.905 |
| H307 | -3.219 | -5.881  | -0.443 |
| H308 | -4.578 | -7.601  | -1.429 |
| H309 | -3.252 | -8.019  | 0.798  |
| H310 | -4.741 | -7.552  | 1.641  |
| H311 | 5.382  | 3.034   | -6.131 |
| H312 | -6.870 | -9.503  | -1.767 |
| H313 | -6.284 | -10.219 | -4.670 |
| H314 | 3.872  | 0.731   | -0.872 |
| H315 | -8.506 | -11.042 | -2.964 |
| H316 | -8.490 | -9.982  | -4.212 |
| H317 | -1.982 | -5.643  | 1.528  |
| H318 | 5.063  | 2.938   | -0.626 |
| H319 | 4.282  | 0.997   | -5.140 |
| H320 | -0.894 | -11.910 | -3.307 |
| H321 | 1.849  | -10.200 | -2.973 |
| H322 | -1.792 | -9.876  | -2.239 |
| H323 | -0.165 | -11.851 | -4.665 |
| H324 | 10.442 | -3.125  | 1.323  |
| H325 | -0.495 | -7.957  | -0.054 |
| H326 | -2.855 | -5.937  | -3.621 |
| H327 | 7.004  | -4.422  | -2.036 |
| H328 | -1.783 | -7.632  | -5.208 |
| H329 | 4.906  | -7.394  | -5.591 |
| H330 | 3.619  | -5.579  | -4.362 |
| H331 | -6.646 | -11.865 | -4.130 |
| H332 | -1.426 | -4.022  | 2.960  |
| H333 | -1.488 | -9.907  | 0.888  |
| H334 | -0.035 | -7.844  | 1.426  |
| H335 | -3.697 | -10.757 | 1.175  |
| H336 | -5.369 | -4.814  | 2.232  |
| H337 | 0.029  | -9.272  | -8.241 |
| H338 | 1.276  | -7.811  | -5.239 |
| H339 | 0.264  | -8.914  | -4.284 |
| H340 | -0.631 | -6.481  | -5.943 |
| H341 | 5.226  | -2.988  | -2.825 |
| H342 | 5.944  | 4.092   | -2.639 |
| H343 | 6.155  | 4.236   | -5.066 |
| H344 | -1.757 | -4.821  | -2.744 |
| H345 | -1.877 | -10.883 | -0.262 |
| H346 | -2.815 | -11.045 | -2.324 |
| H347 | -4.992 | -3.300  | 2.981  |
| H348 | 4.497  | -9.720  | -4.577 |
| H349 | 1.791  | -9.036  | -1.651 |
| H350 | 6.119  | -2.802  | -4.364 |
| H351 | 9.034  | -1.152  | 2.833  |
| H352 | -3.154 | -5.305  | 5.884  |
| H353 | -1.419 | -5.368  | 5.468  |
| H354 | 4.874  | -11.876 | -1.748 |
| H355 | 3.671  | -12.003 | -2.850 |
| H356 | 0.011  | -13.415 | -0.699 |
| H357 | 1.193  | -11.908 | -1.954 |
| H358 | 2.481  | -14.092 | 0.248  |
| H359 | 0.075  | -12.184 | 0.582  |
| H360 | -1.159 | -7.683  | 6.872  |

|       |         |         |        |
|-------|---------|---------|--------|
| H361  | 0.391   | 10.529  | 9.212  |
| H362  | -6.150  | -11.423 | 2.786  |
| H363  | -4.286  | -9.588  | 3.797  |
| H364  | 2.206   | 11.296  | 6.883  |
| H365  | -0.381  | 9.690   | 6.417  |
| H366  | -0.073  | 11.359  | 5.891  |
| H367  | 1.968   | 0.114   | 1.553  |
| H368  | 0.729   | -0.466  | -1.234 |
| H369  | 0.388   | -2.676  | -1.918 |
| H370  | 3.492   | 9.192   | 0.932  |
| Mo371 | 1.489   | -5.781  | -1.777 |
| N372  | -2.397  | 1.253   | -8.800 |
| N373  | -3.999  | 4.405   | -7.635 |
| N374  | -6.778  | 4.231   | -7.063 |
| N375  | -7.147  | 1.500   | -6.477 |
| N376  | -5.490  | 1.389   | -4.176 |
| N377  | -7.013  | 3.036   | -2.385 |
| N378  | -9.570  | 1.676   | -2.269 |
| N379  | -9.204  | -1.194  | -1.960 |
| N380  | -7.076  | -1.643  | -0.245 |
| N381  | -6.659  | 0.281   | 1.937  |
| N382  | -9.461  | 0.836   | 2.580  |
| N383  | -7.959  | -10.297 | -3.399 |
| N384  | -5.912  | -9.865  | -1.714 |
| N385  | -2.981  | -5.424  | 1.562  |
| N386  | -4.666  | -4.228  | 2.670  |
| N387  | -2.423  | -3.768  | 3.083  |
| N388  | -4.695  | -10.744 | 1.477  |
| N389  | 0.849   | 3.007   | -6.414 |
| N390  | 1.054   | -1.776  | -6.073 |
| N391  | 1.057   | 4.733   | -4.407 |
| N392  | -0.371  | 7.087   | -4.325 |
| N393  | -2.712  | 6.326   | -3.074 |
| N394  | -2.180  | 5.661   | -0.350 |
| N395  | 1.684   | 4.120   | 0.659  |
| N396  | 0.961   | 2.083   | 0.802  |
| N397  | -1.827  | 8.100   | 0.962  |
| N398  | 0.304   | 12.324  | 0.125  |
| N399  | -0.153  | 13.574  | 1.901  |
| N400  | -0.490  | -5.446  | 8.010  |
| N401  | 3.127   | -0.483  | 9.131  |
| N402  | 5.975   | 1.415   | 8.102  |
| N403  | 6.127   | 2.862   | 5.705  |
| N404  | 6.249   | 5.581   | 1.559  |
| N405  | 8.110   | 6.586   | 2.573  |
| N406  | 6.089   | 7.699   | 2.527  |
| N407  | 3.433   | 3.028   | 4.701  |
| N408  | 2.114   | 4.368   | 6.815  |
| N409  | 3.036   | 6.789   | 8.008  |
| N410  | 5.611   | 7.241   | 5.868  |
| N411  | 2.024   | 9.324   | 7.601  |
| N412  | 8.981   | -6.771  | -4.432 |
| N413  | 6.968   | -4.136  | -3.023 |
| N414  | 6.848   | -1.462  | -1.434 |
| N415  | 8.180   | -1.841  | 1.072  |
| N416  | 8.414   | -1.490  | -6.534 |
| N417  | 7.225   | 1.035   | -5.710 |
| N418  | 4.249   | -11.325 | -2.343 |
| N419  | 2.913   | -7.194  | -3.119 |
| N420  | 4.317   | -7.570  | -4.783 |
| N421  | 1.508   | -12.010 | -0.989 |
| N422  | -0.210  | -0.781  | 1.231  |
| N423  | -0.231  | -1.924  | 1.236  |
| O424  | -4.048  | 2.329   | -6.696 |
| O425  | -6.287  | 4.570   | -4.862 |
| O426  | -8.995  | 2.069   | -5.256 |
| O427  | -6.834  | -0.285  | -3.420 |
| O428  | -6.149  | 1.775   | -0.704 |
| O429  | -9.586  | 2.276   | -0.065 |
| O430  | -11.226 | -1.221  | -0.871 |
| O431  | -7.468  | -3.907  | -0.204 |
| O432  | -6.013  | -1.616  | 3.044  |
| O433  | -8.795  | 0.294   | 4.682  |
| O434  | -12.000 | -1.072  | 4.242  |
| O435  | -4.480  | -11.265 | -2.876 |
| O436  | -6.834  | -10.061 | 0.978  |
| O437  | -4.449  | -11.193 | 5.048  |
| O438  | -0.887  | 4.082   | -3.394 |
| O439  | 1.807   | 0.286   | -6.685 |
| O440  | 0.637   | 7.729   | -2.369 |



|                 |                                        |               |               |              |
|-----------------|----------------------------------------|---------------|---------------|--------------|
|                 | O441                                   | 3.230         | 6.848         | -2.232       |
|                 | O442                                   | -3.573        | 8.451         | -3.239       |
|                 | O443                                   | -4.404        | 5.948         | 0.089        |
|                 | O444                                   | -2.501        | 7.109         | 2.908        |
|                 | O445                                   | -3.347        | 10.566        | 2.971        |
|                 | O446                                   | -3.059        | -7.804        | 7.616        |
|                 | O447                                   | -1.685        | 0.676         | 6.611        |
|                 | O448                                   | 3.837         | 2.198         | 8.149        |
|                 | O449                                   | 6.699         | 4.766         | 6.858        |
|                 | O450                                   | 4.068         | 5.021         | 3.787        |
|                 | O451                                   | 0.578         | 5.148         | 5.292        |
|                 | O452                                   | 0.968         | 1.662         | 5.949        |
|                 | O453                                   | 1.593         | 6.499         | 9.761        |
|                 | O454                                   | 3.346         | 10.216        | 9.231        |
|                 | O455                                   | 4.982         | 9.412         | 6.205        |
|                 | O456                                   | 0.504         | 12.434        | 8.486        |
|                 | O457                                   | 3.290         | 8.458         | 1.543        |
|                 | O458                                   | 7.136         | -4.837        | -5.205       |
|                 | O459                                   | 7.638         | -0.947        | -3.526       |
|                 | O460                                   | 8.786         | 0.369         | 1.080        |
|                 | O461                                   | 10.485        | -3.483        | 3.332        |
|                 | O462                                   | 7.306         | 1.479         | -7.948       |
|                 | O463                                   | 3.401         | -3.275        | -7.594       |
|                 | O464                                   | 4.693         | -4.425        | -6.184       |
|                 | O465                                   | 8.385         | 3.711         | -3.612       |
|                 | O466                                   | 2.909         | -11.441       | 0.698        |
|                 | O467                                   | 1.171         | -14.227       | 1.806        |
|                 | O468                                   | -1.312        | -3.335        | -4.845       |
|                 | O469                                   | -2.697        | -4.722        | -5.897       |
|                 | O470                                   | 0.005         | -10.444       | -6.275       |
|                 | O471                                   | 0.145         | -8.584        | -7.551       |
|                 | O472                                   | 0.008         | -7.478        | -1.727       |
|                 | O473                                   | -1.918        | -8.203        | -2.638       |
|                 | O474                                   | 0.498         | -5.749        | -3.631       |
|                 | O475                                   | -1.950        | -10.767       | 0.723        |
|                 | O476                                   | -0.770        | -8.174        | 0.874        |
|                 | O477                                   | 3.701         | 6.139         | 0.373        |
|                 | O478                                   | -0.315        | -12.448       | -3.903       |
|                 | O479                                   | -1.871        | -10.860       | -2.075       |
|                 | S480                                   | 4.711         | -0.249        | 5.319        |
|                 | S481                                   | 4.275         | -0.888        | 1.447        |
|                 | S482                                   | 2.843         | -3.955        | -2.456       |
|                 | S483                                   | 1.655         | -1.556        | 3.596        |
|                 | S484                                   | 1.935         | -1.049        | -0.973       |
|                 | S485                                   | 5.706         | -4.205        | 0.063        |
|                 | S486                                   | -0.245        | -4.595        | -0.612       |
|                 | S487                                   | 4.300         | -3.814        | 3.592        |
|                 | S488                                   | 2.755         | -6.647        | 0.064        |
|                 | S489                                   | 0.678         | -5.175        | 2.963        |
| <b>19 (S=1)</b> | <b>bm12b2x6x2n22ndtitconextg.car_3</b> |               |               |              |
| Fe(139) 2.235   | C1                                     | -2.396877988  | 2.089920238   | -9.198433395 |
| Fe(140) -0.069  | C2                                     | -3.138594186  | 2.674701099   | -7.994425456 |
| Fe(141) 2.179   | C3                                     | -4.004224722  | 4.703433585   | -6.910145952 |
| Fe(142) -2.616  | C4                                     | -5.429990291  | 4.255831119   | -6.589970706 |
| Fe(143) 3.133   | C5                                     | -7.537051560  | 3.329480633   | -7.412693555 |
| Fe(144) -2.392  | C6                                     | -7.582406319  | 2.025930154   | -6.607926978 |
| Fe(145) -0.870  | C7                                     | -6.410265452  | -0.042762161  | -6.021614225 |
|                 | C8                                     | -6.012877766  | 0.249619989   | -4.572284348 |
|                 | C9                                     | -4.672137058  | 1.613991080   | -3.053696301 |
|                 | C10                                    | -5.844101426  | 2.140533184   | -2.213493184 |
|                 | C11                                    | -7.818030670  | 3.547682390   | -2.103054056 |
|                 | C12                                    | -8.938922336  | 2.538133898   | -1.823766037 |
|                 | C13                                    | -10.491179819 | 0.906711924   | -2.779122058 |
|                 | C14                                    | -10.314179773 | -0.492251743  | -2.175781634 |
|                 | C15                                    | -8.886044364  | -2.487671279  | -2.008096284 |
|                 | C16                                    | -7.838738271  | -2.717506497  | -0.917013005 |
|                 | C17                                    | -5.972626050  | -1.691498909  | 0.350111018  |
|                 | C18                                    | -6.236660801  | -0.958559942  | 1.678451314  |
|                 | C19                                    | -4.692033857  | -1.215851060  | -0.380949518 |
|                 | C20                                    | -3.512821598  | -0.999505596  | 0.565924650  |
|                 | C21                                    | -4.316922546  | -2.197509910  | -1.496887591 |
|                 | C22                                    | -6.976642183  | 1.153647118   | 2.746844685  |
|                 | C23                                    | -8.486033189  | 1.079014306   | 3.064570316  |
|                 | C24                                    | -6.484441734  | 2.613019811   | 2.586813158  |
|                 | C25                                    | -6.939792379  | 3.479493296   | 3.767565835  |
|                 | C26                                    | -4.958681419  | 2.672850635   | 2.445323375  |
|                 | C27                                    | -10.784974175 | 1.429136724   | 2.355780296  |
|                 | C28                                    | -11.278871056 | 0.112812924   | 2.922422740  |
|                 | C29                                    | -6.331320415  | -11.116272127 | -3.732309984 |

|      |              |               |              |
|------|--------------|---------------|--------------|
| C30  | -5.288765513 | -10.895344838 | -2.635994326 |
| C31  | -4.896790817 | -9.646368275  | -0.506071755 |
| C32  | -5.516371610 | -10.279915080 | 0.752944230  |
| C33  | -4.860263993 | -8.110656961  | -0.416167465 |
| C34  | -4.095575070 | -7.569772778  | 0.794283713  |
| C35  | -3.790786210 | -6.083626391  | 0.610288731  |
| C36  | -3.478306980 | -4.479558137  | 2.499040619  |
| C37  | -5.061165693 | -11.549786608 | 2.795915651  |
| C38  | -4.745165363 | -10.758416855 | 4.049236166  |
| C39  | 0.117424211  | 2.621565426   | -5.253224993 |
| C40  | 0.157186146  | 3.779979467   | -4.246365406 |
| C41  | 0.306684774  | 1.308773865   | -4.456577280 |
| C42  | -0.133369414 | 0.008265050   | -5.162253969 |
| C43  | 0.912744754  | -0.647240369  | -6.057634945 |
| C44  | 1.605854334  | 5.490609311   | -3.217697752 |
| C45  | 0.637320584  | 6.681018519   | -3.243021891 |
| C46  | 3.085745434  | 5.924227387   | -3.379264771 |
| C47  | -0.918568421 | 8.012537813   | -4.595941408 |
| C48  | -2.293339973 | 7.651803113   | -4.010904012 |
| C49  | -3.677086937 | 5.892987176   | -2.990445076 |
| C50  | -3.508177642 | 5.773800012   | -1.467404085 |
| C51  | -1.975455482 | 5.671821048   | 0.445433813  |
| C52  | -2.351426943 | 7.057286768   | 1.000153589  |
| C53  | -0.478099574 | 5.510252210   | 0.758961436  |
| C54  | 0.138370299  | 4.166943254   | 0.541001253  |
| C55  | -0.354804424 | 2.902439449   | 0.788894797  |
| C56  | 1.746341376  | 2.770864150   | 0.118060641  |
| C57  | -1.880654250 | 9.439430177   | 0.819306629  |
| C58  | -3.313819800 | 9.808515808   | 1.203878083  |
| C59  | -1.322290670 | 10.412596560  | -0.241661152 |
| C60  | -0.824077462 | 11.728632418  | 0.281662827  |
| C61  | -1.219364661 | 12.468293457  | 1.378717291  |
| C62  | 0.431606221  | 13.491659654  | 0.313463912  |
| C63  | -2.479804414 | -5.214250709  | 7.740357555  |
| C64  | -2.641889583 | -6.711097503  | 7.552660700  |
| C65  | -2.645826876 | -4.565152461  | 6.342150141  |
| C66  | -2.541567208 | -3.058631883  | 6.390310735  |
| C67  | -3.661222878 | -2.250162139  | 6.657951955  |
| C68  | -1.302568518 | -2.423784654  | 6.188626225  |
| C69  | -3.550934296 | -0.856463886  | 6.725092449  |
| C70  | -1.174862020 | -1.037025262  | 6.263518007  |
| C71  | -2.300855543 | -0.254375020  | 6.533139503  |
| C72  | 3.903573448  | 0.401735539   | 8.250627380  |
| C73  | 4.377370478  | 1.855800421   | 8.130222499  |
| C74  | 3.301150295  | -0.079159421  | 6.922043099  |
| C75  | 6.316638704  | 3.350155277   | 7.906891008  |
| C76  | 6.141259894  | 4.032428485   | 6.549343056  |
| C77  | 5.465266720  | 3.801933706   | 4.189185732  |
| C78  | 3.979048271  | 4.207448244   | 4.077210421  |
| C79  | 5.902455176  | 2.804805839   | 3.100538824  |
| C80  | 5.682823567  | 3.233068549   | 1.643882409  |
| C81  | 6.524721551  | 4.417473732   | 1.142301929  |
| C82  | 6.454736553  | 6.797868197   | 1.865525459  |
| C83  | 1.636481036  | 3.605397513   | 4.370424110  |
| C84  | 1.086864460  | 4.610119766   | 5.395066836  |
| C85  | 0.769575285  | 2.333940793   | 4.429855743  |
| C86  | 1.019403288  | 5.166709556   | 7.776232537  |
| C87  | 1.537055488  | 6.455404530   | 8.405142988  |
| C88  | 3.130323034  | 8.320059840   | 8.305867002  |
| C89  | 2.354782245  | 9.643110780   | 8.128642443  |
| C90  | 4.587368558  | 8.454477794   | 7.821378217  |
| C91  | 4.690297419  | 8.741675413   | 6.325194346  |
| C92  | 0.716644840  | 10.876142007  | 6.789430125  |
| C93  | -0.082653524 | 11.477144970  | 7.935518605  |
| C94  | -0.231009519 | 10.592236365  | 5.591940359  |
| C95  | 0.521818951  | 10.019088781  | 4.414765390  |
| C96  | 1.231468938  | 10.861312936  | 3.544896582  |
| C97  | 0.599853569  | 8.631778201   | 4.207575691  |
| C98  | 1.999056498  | 10.340774451  | 2.502260455  |
| C99  | 1.382813397  | 8.091160046   | 3.181916740  |
| C100 | 2.074729584  | 8.956407511   | 2.336174385  |
| C101 | 8.286439936  | -6.295272909  | -2.513989041 |
| C102 | 7.763574601  | -4.989246824  | -3.085400685 |
| C103 | 6.596945712  | -2.871101073  | -2.558864436 |
| C104 | 7.294281103  | -1.638354288  | -1.973037974 |
| C105 | 7.747776547  | -0.351534957  | 0.052662067  |
| C106 | 8.251378378  | -0.527473594  | 1.480183997  |
| C107 | 8.335203704  | -1.845289029  | 3.542425060  |
| C108 | 9.414462616  | -2.880195184  | 3.768461189  |
| C109 | 7.906329705  | -0.884979365  | -6.467464228 |

|       |               |               |              |
|-------|---------------|---------------|--------------|
| C110  | 7.665794627   | 0.624944295   | -6.337390340 |
| C111  | 6.545461004   | -1.624690534  | -6.480723060 |
| C112  | 6.689207238   | -3.051535820  | -7.042252398 |
| C113  | 5.445628577   | -3.874708390  | -6.770381684 |
| C114  | 7.246535160   | 2.528944382   | -4.857058992 |
| C115  | 8.083289659   | 3.097314274   | -3.728398880 |
| C116  | 5.727414917   | 2.818820414   | -4.749157195 |
| C117  | 5.064918492   | 1.843097959   | -3.815699335 |
| C118  | 5.147260016   | 2.007734031   | -2.423148460 |
| C119  | 4.501454831   | 0.661656435   | -4.325102666 |
| C120  | 4.755957217   | 0.974805147   | -1.568274823 |
| C121  | 4.111821054   | -0.371726425  | -3.468926217 |
| C122  | 4.278982476   | -0.228735939  | -2.089586897 |
| C123  | 3.520830967   | -10.295109083 | -0.674477921 |
| C124  | 2.658782806   | -11.200085787 | 0.217061655  |
| C125  | 2.723980851   | -9.651010544  | -1.821741747 |
| C126  | 3.461694531   | -8.627315558  | -2.626604919 |
| C127  | 4.422481684   | -8.856601525  | -3.590540981 |
| C128  | 3.958869013   | -6.694474333  | -3.508023528 |
| C129  | 0.911478535   | -12.878605792 | 0.422001222  |
| C130  | 1.769410286   | -13.777938395 | 1.283362201  |
| C131  | -1.709934335  | -4.688559647  | -4.615205272 |
| C132  | -1.691082500  | -5.645547690  | -3.458702583 |
| C133  | -0.441993056  | -6.618392282  | -3.461719811 |
| C134  | -0.410662927  | -7.436342567  | -4.783490232 |
| C135  | 0.688309220   | -8.509547783  | -4.770005549 |
| C136  | 0.648209581   | -9.446544256  | -5.942005340 |
| C137  | -0.688599484  | -7.632378861  | -2.303238830 |
| C138  | 2.403534505   | -3.429923769  | 1.232048966  |
| Fe139 | 3.541342693   | -4.576951510  | 0.061485053  |
| Fe140 | 1.632239920   | -1.390108957  | 1.582116267  |
| Fe141 | 2.032578570   | -3.498863272  | 3.118624698  |
| Fe142 | 4.224926738   | -3.018800791  | 1.900199098  |
| Fe143 | 3.702424047   | -1.377221214  | 3.861961338  |
| Fe144 | 1.300395885   | -5.097665295  | 1.235865286  |
| Fe145 | 1.421909738   | -3.261576511  | -0.640265291 |
| H146  | -2.252786647  | 0.193610405   | -8.456404425 |
| H147  | -0.851145209  | 1.037732231   | -8.358388367 |
| H148  | -2.945015741  | 4.571887090   | -8.762379150 |
| H149  | -1.719231329  | 2.845055179   | -9.624998924 |
| H150  | -3.168065947  | 1.904142978   | -9.967163195 |
| H151  | -3.421047894  | 4.561791654   | -5.989633857 |
| H152  | -5.793777544  | 3.840973814   | -8.568128610 |
| H153  | -4.016740271  | 5.779218026   | -7.132882654 |
| H154  | -8.002520097  | 3.155947286   | -8.392072895 |
| H155  | -5.752895192  | 1.476790848   | -7.364197314 |
| H156  | -8.142283836  | 4.066251750   | -6.867137015 |
| H157  | -4.228373837  | 0.776592494   | -2.501488483 |
| H158  | -4.600147855  | 1.618215361   | -5.204068051 |
| H159  | -5.648518773  | -0.682607308  | -6.488863141 |
| H160  | -7.487063982  | 3.939515157   | -1.132421558 |
| H161  | -6.480286236  | 3.331479071   | -3.779960619 |
| H162  | -7.357588553  | -0.594474950  | -5.991853251 |
| H163  | -3.906255969  | 2.396313841   | -3.146194572 |
| H164  | -8.867279275  | 1.870804733   | -3.781342549 |
| H165  | -8.234113768  | 4.378759836   | -2.689476754 |
| H166  | -5.151980958  | -2.370880702  | -2.189881356 |
| H167  | -3.470874801  | -1.807421922  | -2.083785382 |
| H168  | -3.998678867  | -3.164564661  | -1.075670221 |
| H169  | -4.943155178  | -0.242879950  | -0.831233208 |
| H170  | -10.893643619 | 0.776203106   | -3.794227805 |
| H171  | -4.596513891  | 2.085173622   | 1.590409890  |
| H172  | -9.053916756  | 1.720537116   | 1.150249465  |
| H173  | -8.034293687  | 3.512670373   | 3.870365958  |
| H174  | -2.654365442  | -0.615814851  | -0.002809335 |
| H175  | -3.189785559  | -1.937641822  | 1.039673950  |
| H176  | -3.319219086  | -4.866123983  | 8.372513919  |
| H177  | -4.641748656  | 3.716377366   | 2.296917656  |
| H178  | -6.583339130  | 4.510971189   | 3.629656196  |
| H179  | -4.472102590  | 2.294810838   | 3.359459076  |
| H180  | -6.519331430  | 3.100577328   | 4.713372023  |
| H181  | -6.935113107  | 3.020908061   | 1.663484168  |
| H182  | -6.485702815  | 0.697089270   | 3.617353465  |
| H183  | -6.581453346  | 0.800140678   | 0.669236095  |
| H184  | -3.735610388  | -0.274355314  | 1.362328186  |
| H185  | 1.239515421   | 1.552181526   | 3.808959949  |
| H186  | -0.208936482  | 2.578166358   | 3.991458485  |
| H187  | -0.328964069  | 1.781317064   | 5.970602719  |
| H188  | -2.977214386  | 1.556669698   | 6.716955167  |
| H189  | -0.211790793  | -0.561909746  | 6.071708427  |

|      |               |               |              |
|------|---------------|---------------|--------------|
| H190 | -0.423877749  | -3.017439175  | 5.923864191  |
| H191 | -4.641132125  | -2.712557442  | 6.804679545  |
| H192 | -7.283140734  | -0.762750382  | -1.059809302 |
| H193 | -8.563107384  | -3.080921639  | -2.877727562 |
| H194 | -9.835492331  | -2.907655909  | -1.652008831 |
| H195 | -8.418370095  | -0.662592695  | -3.005656270 |
| H196 | -11.253916078 | 1.407108836   | -2.168527652 |
| H197 | -4.435496728  | -0.241298547  | 6.911543417  |
| H198 | -5.867261913  | -2.749473266  | 0.620133578  |
| H199 | -11.064095597 | 2.244670447   | 3.042853114  |
| H200 | -11.306681758 | 1.592263452   | 1.399860732  |
| H201 | -10.681036601 | -0.779621438  | 2.623591641  |
| H202 | -4.613073504  | -12.551365420 | 2.886423089  |
| H203 | 1.664759819   | -2.479638402  | -6.562642544 |
| H204 | -2.733664380  | -5.998761843  | -5.594768490 |
| H205 | 6.829628152   | -2.999298557  | -8.131918023 |
| H206 | 7.569747217   | -3.539679595  | -6.600459939 |
| H207 | 5.823168126   | -1.069432461  | -7.099369566 |
| H208 | 9.075813127   | 2.603102758   | -3.599737238 |
| H209 | 8.341636355   | -0.990502485  | -7.473877333 |
| H210 | 1.361613175   | 1.235290421   | -4.144446803 |
| H211 | -1.022001236  | 0.201839559   | -5.788290607 |
| H212 | 7.612707721   | 0.498461601   | -4.268292741 |
| H213 | 7.618128749   | 3.057516861   | -5.757687150 |
| H214 | 8.535390288   | -1.396089113  | -4.555390289 |
| H215 | 0.378722685   | -2.545408624  | -5.372987927 |
| H216 | 6.138966394   | -1.642931699  | -5.458354359 |
| H217 | 9.169960443   | -2.329418512  | -5.749023153 |
| H218 | 0.788416265   | 3.326717120   | -7.073067113 |
| H219 | -0.291746050  | 1.397703788   | -3.538513981 |
| H220 | 6.387118888   | -4.651982116  | -5.236834170 |
| H221 | -0.456702476  | -0.712824252  | -4.398377194 |
| H222 | -2.585240997  | 4.936944746   | 0.989835798  |
| H223 | -1.319397473  | 2.550849439   | 1.139864529  |
| H224 | -4.488732945  | 6.613140106   | -3.150869393 |
| H225 | -1.742978284  | 5.662338945   | -3.834503795 |
| H226 | -1.358560610  | 7.913115141   | -0.595273424 |
| H227 | -1.975322029  | 12.295466059  | 2.137185126  |
| H228 | -4.087142653  | 9.364968724   | 0.531373349  |
| H229 | -2.075501598  | 10.565099303  | -1.035077747 |
| H230 | -1.256118895  | 9.478689284   | 1.727668428  |
| H231 | 1.179343498   | 14.247848174  | 0.088580208  |
| H232 | -0.351746933  | 5.796731084   | 1.817484833  |
| H233 | 0.085263833   | 6.242126383   | 0.160640139  |
| H234 | -0.435489937  | 14.336232989  | 2.067055883  |
| H235 | -0.465066758  | 9.920473589   | -0.729210247 |
| H236 | -1.476591081  | 5.404980781   | -1.631047816 |
| H237 | -4.016086648  | 4.925845591   | -3.388685619 |
| H238 | -0.609142357  | 8.941779760   | -4.097269045 |
| H239 | 2.691586660   | 2.319516479   | -0.168586261 |
| H240 | -1.048075431  | 8.236350950   | -5.663134927 |
| H241 | 0.732153982   | 1.031026751   | 0.729465757  |
| H242 | -1.147562208  | -5.141436101  | 9.294577379  |
| H243 | -0.941037696  | -3.944211657  | 8.197542685  |
| H244 | 3.355588564   | 2.360879724   | 4.805992430  |
| H245 | 1.492096884   | 4.066560616   | 3.381898101  |
| H246 | 2.422208863   | 3.933015619   | 6.798158191  |
| H247 | 2.649723925   | 5.351228918   | 0.125202481  |
| H248 | 3.415587518   | 6.600810648   | -1.557038794 |
| H249 | 2.896952093   | 6.852825850   | 0.595278781  |
| H250 | 3.699546585   | 5.010456748   | -3.265129806 |
| H251 | 3.237296208   | 6.304440909   | -4.402408648 |
| H252 | 5.135046925   | 7.543183822   | 8.101479359  |
| H253 | 5.034337365   | 9.303916171   | 8.355959919  |
| H254 | 5.511104934   | 6.837916520   | 5.945953964  |
| H255 | 5.186810136   | 7.846719718   | 4.550733378  |
| H256 | 8.172971659   | 7.677165066   | 2.547865585  |
| H257 | 6.713607937   | 4.312740712   | 0.062514555  |
| H258 | 2.536160265   | 11.006949543  | 1.823162214  |
| H259 | 0.035488718   | 7.940892867   | 4.839422328  |
| H260 | 4.709411518   | 7.883041671   | 1.954626677  |
| H261 | 5.369152411   | 1.853300649   | 3.256718337  |
| H262 | 5.541560868   | 2.261481440   | 5.677745011  |
| H263 | 4.617230409   | 3.427450713   | 1.443580552  |
| H264 | 0.371888274   | 6.435125728   | -5.259826970 |
| H265 | 7.393838182   | 3.277688293   | 8.109837398  |
| H266 | 2.002353120   | 4.156378497   | -4.916909008 |
| H267 | 6.972299039   | 2.590311294   | 3.256847328  |
| H268 | 1.467014371   | 7.010707818   | 3.062378315  |
| H269 | 3.038720586   | 9.088012045   | 0.650877116  |

|      |              |               |              |
|------|--------------|---------------|--------------|
| H270 | 5.879833159  | 4.032408446   | 8.649304700  |
| H271 | 8.417355123  | 6.208353076   | 1.671664792  |
| H272 | 6.155802253  | 8.788942128   | 2.166406350  |
| H273 | 1.431033120  | 1.853685052   | -6.629195792 |
| H274 | -0.914647761 | 2.621529376   | -5.654480256 |
| H275 | 1.185652381  | 11.943794068  | 3.682543921  |
| H276 | 1.474304870  | 5.039462858   | -2.220306709 |
| H277 | 6.023066708  | 4.742377282   | 4.097748411  |
| H278 | 7.501903972  | 4.406608912   | 1.643706844  |
| H279 | 5.956862205  | 2.368547652   | 1.022480386  |
| H280 | 4.892337057  | 5.805916577   | 1.026828206  |
| H281 | -0.031389159 | 5.348637699   | 7.502465391  |
| H282 | 2.863995517  | 6.722531353   | 6.869920834  |
| H283 | 3.149880179  | 8.152032724   | 9.393172649  |
| H284 | 1.034847908  | 4.405120873   | 8.569092934  |
| H285 | 1.288551039  | 8.825767712   | 6.598100494  |
| H286 | 8.605198861  | -6.151277570  | -1.471180370 |
| H287 | 7.412981752  | -6.980021952  | -2.491766071 |
| H288 | 3.889540462  | -9.498190784  | -0.013213022 |
| H289 | 9.577441939  | -7.765716509  | -3.098095209 |
| H290 | 9.131690677  | -6.749302615  | -4.303817347 |
| H291 | 3.026610849  | -1.136259955  | 7.033903910  |
| H292 | 2.158980430  | 0.925099544   | 9.162268439  |
| H293 | 6.321596215  | 1.213402012   | 7.990909544  |
| H294 | 2.394154304  | 0.498205128   | 6.694530983  |
| H295 | 3.326179183  | 0.485004164   | 10.214421193 |
| H296 | 7.451406356  | -2.090533879  | 4.151890007  |
| H297 | 4.767080557  | -0.236805152  | 8.497480717  |
| H298 | -5.896639825 | -7.732989062  | -0.409084619 |
| H299 | -3.876748117 | -10.021719827 | -0.649609618 |
| H300 | 7.357747750  | -2.387204075  | 1.729052818  |
| H301 | -2.866780960 | -3.174066963  | 3.946370835  |
| H302 | 8.592717535  | 0.012613901   | -0.546682409 |
| H303 | 3.679916886  | -1.292426089  | -3.869523954 |
| H304 | 7.016413006  | 0.472865814   | 0.087941555  |
| H305 | -4.716139865 | -5.511750407  | 0.452108813  |
| H306 | 6.522165310  | -2.139805358  | -0.150474503 |
| H307 | -3.171506454 | -5.939254971  | -0.289027407 |
| H308 | -4.385563835 | -7.755581553  | -1.345167592 |
| H309 | -3.140264262 | -8.100204611  | 0.922370903  |
| H310 | -4.677707294 | -7.714083211  | 1.719106334  |
| H311 | 5.295947817  | 2.739047792   | -5.756987857 |
| H312 | -6.646029751 | -9.719304620  | -1.758344113 |
| H313 | -5.957736775 | -10.576923571 | -4.616497215 |
| H314 | 4.021236936  | -1.044520569  | -1.417995721 |
| H315 | -8.216936027 | -11.330866560 | -2.929505147 |
| H316 | -8.168962642 | -10.332317989 | -4.229450466 |
| H317 | -2.045652692 | -5.685249227  | 1.753412009  |
| H318 | 4.823543849  | 1.087766645   | -0.484323135 |
| H319 | 4.391189202  | 0.545833607   | -5.405773679 |
| H320 | -0.544760200 | -12.052695517 | -2.952355949 |
| H321 | 2.392602382  | -10.445981950 | -2.513344070 |
| H322 | -1.529652132 | -10.059729740 | -1.926218247 |
| H323 | 0.259168466  | -11.975230545 | -4.271630206 |
| H324 | 10.016693524 | -3.145270224  | 2.865728294  |
| H325 | -0.371614489 | -8.082710249  | 0.291140136  |
| H326 | -2.609738338 | -6.250801689  | -3.434656598 |
| H327 | 7.140645298  | -4.401107944  | -1.214138537 |
| H328 | -1.391219576 | -7.918131580  | -4.925617971 |
| H329 | 5.364903831  | -7.441155357  | -4.897465695 |
| H330 | 3.977255039  | -5.640520978  | -3.760835211 |
| H331 | -6.305946688 | -12.190991106 | -3.981957716 |
| H332 | -1.571007673 | -3.959648856  | 3.076333325  |
| H333 | -1.399087386 | -10.026023128 | 1.201491519  |
| H334 | -0.029072011 | -7.904451219  | 1.796526583  |
| H335 | -3.614015071 | -10.892584482 | 1.344308344  |
| H336 | -5.474424845 | -4.837519804  | 2.226966299  |
| H337 | 0.655806917  | -9.493714012  | -7.833757932 |
| H338 | 1.666961856  | -8.006339967  | -4.758449436 |
| H339 | 0.625129626  | -9.131114400  | -3.869848250 |
| H340 | -0.233516995 | -6.748439532  | -5.622968501 |
| H341 | 5.553477670  | -2.923781188  | -2.211482300 |
| H342 | 5.556341826  | 2.936895716   | -2.017781964 |
| H343 | 5.615306416  | 3.859281263   | -4.408571664 |
| H344 | -1.614160824 | -5.058670110  | -2.534079805 |
| H345 | -1.710993639 | -11.024314964 | 0.045758259  |
| H346 | -2.528764045 | -11.240299085 | -2.061800170 |
| H347 | -5.132389439 | -3.253666423  | 2.842717515  |
| H348 | 4.894964269  | -9.773397103  | -3.926519980 |
| H349 | 1.820810327  | -9.182501405  | -1.408418312 |

|       |               |               |              |
|-------|---------------|---------------|--------------|
| H350  | 6.612677601   | -2.782074730  | -3.647287176 |
| H351  | 8.732223246   | -0.877275892  | 3.892727362  |
| H352  | -3.625135747  | -4.873297310  | 5.944854311  |
| H353  | -1.867858974  | -4.972689846  | 5.677311235  |
| H354  | 5.230494352   | -11.390853354 | -0.386110881 |
| H355  | 4.373689507   | -11.862419806 | -1.698283309 |
| H356  | 0.346698331   | -13.527905452 | -0.266030188 |
| H357  | 1.477677096   | -11.864831523 | -1.369192045 |
| H358  | 2.794067922   | -13.972467947 | 0.886072621  |
| H359  | 0.179628560   | -12.345106041 | 1.049494795  |
| H360  | -1.708387242  | -7.231360292  | 7.229392804  |
| H361  | -0.417916179  | 10.748619443  | 8.712033107  |
| H362  | -6.156708598  | -11.672950240 | 2.753654672  |
| H363  | -4.493013951  | -9.682788104  | 3.884784810  |
| H364  | 1.471506804   | 11.618092597  | 6.479182724  |
| H365  | -1.025440631  | 9.901492683   | 5.915395965  |
| H366  | -0.708371718  | 11.544760083  | 5.320272771  |
| H367  | 1.690471170   | 0.104850884   | 1.778826857  |
| H368  | 0.238279892   | -0.718552562  | -0.878206411 |
| H369  | 0.487785464   | -2.910554139  | -1.777084820 |
| Mo370 | 1.610866857   | -5.854919000  | -1.371391483 |
| N371  | -1.658989631  | 0.857850702   | -8.960279979 |
| N372  | -3.382554296  | 4.013877218   | -8.032862129 |
| N373  | -6.188675807  | 3.830806804   | -7.631111151 |
| N374  | -6.559860694  | 1.160040656   | -6.827245139 |
| N375  | -5.067873739  | 1.206672495   | -4.394555830 |
| N376  | -6.690505340  | 2.994585800   | -2.836760339 |
| N377  | -9.309695308  | 1.749831382   | -2.866732666 |
| N378  | -9.120546138  | -1.110052810  | -2.407147667 |
| N379  | -7.126341583  | -1.623578318  | -0.539260704 |
| N380  | -6.629238843  | 0.338040204   | 1.581311215  |
| N381  | -9.357204187  | 1.406544328   | 2.074530778  |
| N382  | -7.662416000  | -10.603263378 | -3.385658809 |
| N383  | -5.677997534  | -10.045849752 | -1.667516413 |
| N384  | -3.052766978  | -5.497861549  | 1.733587110  |
| N385  | -4.794142091  | -4.207051016  | 2.638648516  |
| N386  | -2.577024741  | -3.719563225  | 3.137225291  |
| N387  | -4.632048815  | -10.899326468 | 1.573549285  |
| N388  | 1.148067664   | 2.786036384   | -6.282795288 |
| N389  | 1.004534801   | -1.989872693  | -5.960866038 |
| N390  | 1.305079771   | 4.491530399   | -4.238306843 |
| N391  | 0.112877317   | 7.002430476   | -4.456652554 |
| N392  | -2.506966502  | 6.338425044   | -3.725160515 |
| N393  | -2.246768557  | 5.586670145   | -0.988186296 |
| N394  | 1.456227568   | 4.071902947   | 0.117377527  |
| N395  | 0.677369840   | 2.037904697   | 0.505370964  |
| N396  | -1.886121448  | 8.097446254   | 0.258944079  |
| N397  | 0.208718667   | 12.379287827  | -0.376403182 |
| N398  | -0.409425005  | 13.585416626  | 1.382545014  |
| N399  | -1.151590488  | -4.941857575  | 8.291312229  |
| N400  | 2.903500417   | 0.236921058   | 9.314972571  |
| N401  | 5.725463081   | 2.035124856   | 8.045365460  |
| N402  | 5.779621232   | 3.252541521   | 5.508267122  |
| N403  | 5.874132208   | 5.713901509   | 1.365294686  |
| N404  | 7.775067988   | 6.836983562   | 2.141337597  |
| N405  | 5.702772166   | 7.878853429   | 2.202285275  |
| N406  | 3.059242432   | 3.307915923   | 4.526318449  |
| N407  | 1.719787580   | 4.654782750   | 6.606809871  |
| N408  | 2.474555955   | 7.160531633   | 7.705056419  |
| N409  | 5.156465506   | 7.722251614   | 5.562661353  |
| N410  | 1.364919841   | 9.641039489   | 7.203236216  |
| N411  | 9.412109123   | -6.781291794  | -3.318932152 |
| N412  | 7.270371031   | -4.110817463  | -2.193469185 |
| N413  | 7.181295911   | -1.499601195  | -0.632882939 |
| N414  | 7.978510349   | -1.684207740  | 2.142589939  |
| N415  | 8.909077776   | -1.369462433  | -5.512728796 |
| N416  | 7.585946819   | 1.130979543   | -5.073824005 |
| N417  | 4.692162078   | -11.035993906 | -1.181765066 |
| N418  | 3.186374539   | -7.262330558  | -2.584934932 |
| N419  | 4.722399198   | -7.625975764  | -4.132095394 |
| N420  | 1.715593552   | -11.976328379 | -0.385158414 |
| N421  | -0.452207493  | -0.857402005  | 1.552782357  |
| N422  | -0.425250731  | -2.000926283  | 1.571338488  |
| O423  | -3.553190497  | 1.961308033   | -7.060289764 |
| O424  | -5.856431967  | 4.292682104   | -5.424481809 |
| O425  | -8.523781347  | 1.784342872   | -5.834737511 |
| O426  | -6.538368202  | -0.349029644  | -3.619908713 |
| O427  | -5.991927752  | 1.810495757   | -1.024722256 |
| O428  | -9.500212618  | 2.495742529   | -0.715674795 |
| O429  | -11.255882826 | -1.016092384  | -1.566481353 |

|                 |                                         |               |              |
|-----------------|-----------------------------------------|---------------|--------------|
| O430            | -7.665616146                            | -3.857586405  | -0.462171898 |
| O431            | -6.089133060                            | -1.548881437  | 2.767468307  |
| O432            | -8.887878262                            | 0.749376059   | 4.193493643  |
| O433            | -12.288180394                           | 0.010761624   | 3.603684735  |
| O434            | -4.179098986                            | -11.465326803 | -2.711488471 |
| O435            | -6.739853664                            | -10.211759573 | 0.966146439  |
| O436            | -4.767572628                            | -11.244431023 | 5.169061555  |
| O437            | -0.807197329                            | 4.029042039   | -3.489591564 |
| O438            | 1.630578261                             | 0.008470033   | -6.845035571 |
| O439            | 0.339109342                             | 7.290364212   | -2.203939454 |
| O440            | 3.481223680                             | 6.945407456   | -2.490122192 |
| O441            | -3.134070644                            | 8.547394967   | -3.850570598 |
| O442            | -4.497094659                            | 5.875081764   | -0.729965345 |
| O443            | -2.930144771                            | 7.216609673   | 2.081879160  |
| O444            | -3.616608759                            | 10.558373893  | 2.118990481  |
| O445            | -3.694439562                            | -7.315514729  | 7.708470232  |
| O446            | -2.120458743                            | 1.116132362   | 6.570260577  |
| O447            | 3.587112889                             | 2.817560880   | 8.123851910  |
| O448            | 6.369236531                             | 5.256982148   | 6.465241630  |
| O449            | 3.660687101                             | 5.306912820   | 3.598946911  |
| O450            | 0.077936945                             | 5.276355385   | 5.127397825  |
| O451            | 0.624217369                             | 1.861146033   | 5.772851777  |
| O452            | 1.087793147                             | 6.832513367   | 9.494773067  |
| O453            | 2.621995750                             | 10.632593522  | 8.824562892  |
| O454            | 4.332927428                             | 9.833520448   | 5.853681455  |
| O455            | -0.392869327                            | 12.657166106  | 7.984725594  |
| O456            | 2.866974674                             | 8.401021059   | 1.323655169  |
| O457            | 7.776534781                             | -4.791820612  | -4.327985989 |
| O458            | 7.923034314                             | -0.835249953  | -2.695245632 |
| O459            | 8.872437809                             | 0.417232175   | 1.993977018  |
| O460            | 9.642767280                             | -3.382197537  | 4.858044900  |
| O461            | 7.523110725                             | 1.337811671   | -7.345310621 |
| O462            | 4.422698533                             | -3.799681301  | -7.439086754 |
| O463            | 5.496397525                             | -4.703400504  | -5.702021551 |
| O464            | 7.756678272                             | 4.045008939   | -3.028524216 |
| O465            | 2.876277997                             | -11.301179269 | 1.439406087  |
| O466            | 1.363417356                             | -14.326341314 | 2.299062070  |
| O467            | -1.188532922                            | -3.582292095  | -4.632572959 |
| O468            | -2.364364157                            | -5.107612750  | -5.747279489 |
| O469            | 0.606846133                             | -10.673375693 | -5.875391110 |
| O470            | 0.680899083                             | -8.802080354  | -7.138562820 |
| O471            | 0.188875066                             | -7.616219702  | -1.357025848 |
| O472            | -1.663091397                            | -8.422001857  | -2.355353219 |
| O473            | 0.729450803                             | -5.915810664  | -3.279142752 |
| O474            | -1.841390532                            | -10.894838553 | 1.022862310  |
| O475            | -0.699069643                            | -8.294690992  | 1.203974256  |
| O476            | 3.325934273                             | 6.110722649   | 0.115023993  |
| O477            | 0.060343366                             | -12.582877126 | -3.529180033 |
| O478            | -1.603758967                            | -11.044655843 | -1.759531796 |
| S479            | 4.470585976                             | 0.090456718   | 5.495496749  |
| S480            | 4.014482040                             | -0.808579662  | 1.714672588  |
| S481            | 2.955540740                             | -3.989460134  | -2.021319358 |
| S482            | 1.424917985                             | -1.476202864  | 3.878025758  |
| S483            | 1.553934378                             | -1.040285634  | -0.703788478 |
| S484            | 5.668007161                             | -4.154109526  | 0.655808400  |
| S485            | -0.233280457                            | -4.695254327  | -0.341793316 |
| S486            | 4.102970135                             | -3.605737805  | 4.051782260  |
| S487            | 2.769943617                             | -6.644902444  | 0.563560404  |
| S488            | 0.520031883                             | -5.123099031  | 3.319840699  |
| <b>19 (S=0)</b> | <b>bm12b2x6x2n22ndtitconex0tb.car_3</b> |               |              |
| Fe(139) 2.312   | C1 -2.346976566                         | 2.417080241   | -9.098434219 |
| Fe(140) -0.135  | C2 -3.117116662                         | 2.945432155   | -7.883095813 |
| Fe(141) 1.736   | C3 -4.018648963                         | 4.936059061   | -6.749507918 |
| Fe(142) -2.611  | C4 -5.438705920                         | 4.464347779   | -6.445693931 |
| Fe(143) 1.921   | C5 -7.534179742                         | 3.538078554   | -7.295957210 |
| Fe(144) -2.347  | C6 -7.570162680                         | 2.213908321   | -6.524011074 |
| Fe(145) -0.878  | C7 -6.375664486                         | 0.147993551   | -5.978411546 |
|                 | C8 -5.980107925                         | 0.415780784   | -4.523605233 |
|                 | C9 -4.644946856                         | 1.752481454   | -2.977513330 |
|                 | C10 -5.820032218                        | 2.245447517   | -2.121565388 |
|                 | C11 -7.812952057                        | 3.621644857   | -1.970238008 |
|                 | C12 -8.924370910                        | 2.593071705   | -1.724420848 |
|                 | C13 -10.469930031                       | 0.989779699   | -2.738772397 |
|                 | C14 -10.291156556                       | -0.428220712  | -2.180429521 |
|                 | C15 -8.865013906                        | -2.428411914  | -2.078266342 |
|                 | C16 -7.811881541                        | -2.681347485  | -0.998743591 |
|                 | C17 -5.947328306                        | -1.681387635  | 0.287265016  |
|                 | C18 -6.207048190                        | -0.997562225  | 1.640793103  |
|                 | C19 -4.671075217                        | -1.177868632  | -0.437072145 |

|     |               |               |              |
|-----|---------------|---------------|--------------|
| C20 | -3.494570115  | -0.977551754  | 0.516311944  |
| C21 | -4.295726178  | -2.125832078  | -1.580660057 |
| C22 | -6.965298820  | 1.060747474   | 2.796393399  |
| C23 | -8.471676088  | 0.964278050   | 3.116527320  |
| C24 | -6.484912861  | 2.529564512   | 2.698146072  |
| C25 | -6.926663309  | 3.337039535   | 3.924089632  |
| C26 | -4.961113220  | 2.602495971   | 2.535519150  |
| C27 | -10.773734538 | 1.322706413   | 2.429120007  |
| C28 | -11.263033706 | 0.003991904   | 2.994845869  |
| C29 | -6.326678660  | -10.953857712 | -4.130294760 |
| C30 | -5.282713331  | -10.791054593 | -3.025543906 |
| C31 | -4.888474785  | -9.627736783  | -0.845511011 |
| C32 | -5.511275807  | -10.303518895 | 0.390862823  |
| C33 | -4.847101132  | -8.095946298  | -0.706190449 |
| C34 | -4.089337061  | -7.595950273  | 0.526321115  |
| C35 | -3.768910587  | -6.108631375  | 0.383706648  |
| C36 | -3.480885484  | -4.556706227  | 2.318678103  |
| C37 | -5.050321472  | -11.655270629 | 2.382451702  |
| C38 | -4.764450584  | -10.905597841 | 3.667202348  |
| C39 | 0.112434159   | 2.789794910   | -5.125532607 |
| C40 | 0.155804735   | 3.905816474   | -4.071123481 |
| C41 | 0.304743053   | 1.441463835   | -4.392247802 |
| C42 | -0.146949708  | 0.177418112   | -5.154467894 |
| C43 | 0.885194122   | -0.435681676  | -6.094631391 |
| C44 | 1.601555787   | 5.595270632   | -3.000578205 |
| C45 | 0.637269861   | 6.789568042   | -3.007237536 |
| C46 | 3.083676853   | 6.024907798   | -3.147995483 |
| C47 | -0.914587010  | 8.139601478   | -4.349831822 |
| C48 | -2.290633400  | 7.767795906   | -3.774807036 |
| C49 | -3.673394754  | 5.986718435   | -2.790873849 |
| C50 | -3.503596213  | 5.840791622   | -1.270753678 |
| C51 | -1.981064811  | 5.632353823   | 0.638486312  |
| C52 | -2.357675416  | 7.000739127   | 1.235107683  |
| C53 | -0.484475079  | 5.460256548   | 0.950556302  |
| C54 | 0.142984880   | 4.129606260   | 0.688699947  |
| C55 | -0.330877819  | 2.853300207   | 0.913369820  |
| C56 | 1.770496597   | 2.765288920   | 0.237741043  |
| C57 | -1.880228174  | 9.386912338   | 1.136941299  |
| C58 | -3.315063597  | 9.756925898   | 1.506921439  |
| C59 | -1.289926011  | 10.387424566  | 0.122191885  |
| C60 | -0.805096613  | 11.690141778  | 0.691662315  |
| C61 | -1.205629916  | 12.391913209  | 1.811899890  |
| C62 | 0.438469728   | 13.459852457  | 0.780369024  |
| C63 | -2.503386534  | -5.453642647  | 7.562776764  |
| C64 | -2.664203682  | -6.945797507  | 7.340793451  |
| C65 | -2.639388386  | -4.771954433  | 6.177805074  |
| C66 | -2.540767296  | -3.266280370  | 6.263414532  |
| C67 | -3.662863667  | -2.468664822  | 6.550462951  |
| C68 | -1.304011146  | -2.622143438  | 6.078311807  |
| C69 | -3.559047834  | -1.076306230  | 6.646154829  |
| C70 | -1.183093384  | -1.236503076  | 6.180246967  |
| C71 | -2.312686278  | -0.464324683  | 6.463485907  |
| C72 | 3.897866539   | 0.057258291   | 8.176412745  |
| C73 | 4.362646212   | 1.516697149   | 8.116942381  |
| C74 | 3.199545848   | -0.336358330  | 6.868140892  |
| C75 | 6.294324171   | 3.032202502   | 7.972139253  |
| C76 | 6.135147956   | 3.764710537   | 6.639228898  |
| C77 | 5.456779565   | 3.630136322   | 4.273092845  |
| C78 | 3.972891547   | 4.049557882   | 4.176473083  |
| C79 | 5.894630288   | 2.682730583   | 3.141515953  |
| C80 | 5.705322341   | 3.191242382   | 1.706965874  |
| C81 | 6.554982981   | 4.398712401   | 1.283843662  |
| C82 | 6.475675422   | 6.748883816   | 2.097681504  |
| C83 | 1.626807425   | 3.460211483   | 4.444965462  |
| C84 | 1.086741112   | 4.431988233   | 5.506100306  |
| C85 | 0.746034530   | 2.197464460   | 4.460716701  |
| C86 | 1.012999953   | 4.885901548   | 7.906856854  |
| C87 | 1.532356833   | 6.142434243   | 8.594447869  |
| C88 | 3.127432621   | 8.008976582   | 8.577405822  |
| C89 | 2.357932425   | 9.341162616   | 8.452127562  |
| C90 | 4.586928666   | 8.160721140   | 8.103848345  |
| C91 | 4.693427392   | 8.496104723   | 6.618977142  |
| C92 | 0.705333457   | 10.623732587  | 7.172690561  |
| C93 | -0.114733235  | 11.157549128  | 8.336873038  |
| C94 | -0.226382278  | 10.384595848  | 5.952430908  |
| C95 | 0.537359705   | 9.858636709   | 4.759448469  |
| C96 | 1.267257204   | 10.731008748  | 3.937492554  |
| C97 | 0.599024678   | 8.482097126   | 4.485126749  |
| C98 | 2.036830353   | 10.252508621  | 2.875219607  |
| C99 | 1.385441818   | 7.982798214   | 3.441548474  |



|       |               |               |              |
|-------|---------------|---------------|--------------|
| C100  | 2.095261297   | 8.876833577   | 2.641304606  |
| C101  | 8.305267596   | -6.155823209  | -2.743315838 |
| C102  | 7.748094978   | -4.842968059  | -3.264025177 |
| C103  | 6.563707226   | -2.760689067  | -2.633966172 |
| C104  | 7.266577819   | -1.549731228  | -2.010168115 |
| C105  | 7.728388832   | -0.336040236  | 0.055379834  |
| C106  | 8.254324774   | -0.555849132  | 1.467754577  |
| C107  | 8.326227917   | -1.899810575  | 3.508494756  |
| C108  | 9.390250668   | -2.950406846  | 3.725131472  |
| C109  | 7.897795327   | -0.653150364  | -6.478517021 |
| C110  | 7.665992996   | 0.852564889   | -6.298828604 |
| C111  | 6.531893368   | -1.382685700  | -6.525185290 |
| C112  | 6.665530992   | -2.782620150  | -7.152466386 |
| C113  | 5.416425131   | -3.607634291  | -6.916065887 |
| C114  | 7.215338837   | 2.702088451   | -4.758348798 |
| C115  | 8.052999724   | 3.233401542   | -3.612174194 |
| C116  | 5.696362420   | 2.989508873   | -4.633811832 |
| C117  | 5.038075885   | 1.980686196   | -3.733096458 |
| C118  | 5.121871522   | 2.093221773   | -2.335266645 |
| C119  | 4.482916104   | 0.814429298   | -4.283646903 |
| C120  | 4.740922800   | 1.025012679   | -1.520146420 |
| C121  | 4.106476590   | -0.255838983  | -3.468496888 |
| C122  | 4.270713917   | -0.162715333  | -2.084508663 |
| C123  | 3.498217704   | -10.262875329 | -1.022967719 |
| C124  | 2.629529418   | -11.195314349 | -0.165857747 |
| C125  | 2.708496076   | -9.579530015  | -2.151626668 |
| C126  | 3.451554472   | -8.528130727  | -2.916855240 |
| C127  | 4.418219427   | -8.722907843  | -3.882085728 |
| C128  | 3.956023404   | -6.564198946  | -3.722664591 |
| C129  | 0.881971675   | -12.886982269 | -0.040293171 |
| C130  | 1.724773390   | -13.812897259 | 0.807561294  |
| C131  | -1.689841338  | -4.500217494  | -4.758592605 |
| C132  | -1.695498591  | -5.513254702  | -3.651765537 |
| C133  | -0.446814127  | -6.486133685  | -3.684015500 |
| C134  | -0.408763686  | -7.253638826  | -5.036475336 |
| C135  | 0.692575797   | -8.326085673  | -5.058816609 |
| C136  | 0.656451793   | -9.215070418  | -6.268162250 |
| C137  | -0.700545700  | -7.542602143  | -2.566507319 |
| C138  | 2.418499343   | -3.484211995  | 1.137414046  |
| Fe139 | 3.544979266   | -4.591132752  | -0.089117432 |
| Fe140 | 1.663055054   | -1.449988642  | 1.598619292  |
| Fe141 | 2.025760367   | -3.634556765  | 3.007659945  |
| Fe142 | 4.231927782   | -3.085593884  | 1.813662334  |
| Fe143 | 3.650898920   | -1.588004486  | 3.851455711  |
| Fe144 | 1.293896042   | -5.133267507  | 1.068090824  |
| Fe145 | 1.414440471   | -3.236912898  | -0.724430094 |
| H146  | -2.265135044  | 0.478458979   | -8.465773457 |
| H147  | -0.846343552  | 1.280860873   | -8.285050379 |
| H148  | -2.944672231  | 4.865369649   | -8.593294102 |
| H149  | -1.638329339  | 3.184032945   | -9.446723795 |
| H150  | -3.092282957  | 2.299241417   | -9.905355147 |
| H151  | -3.436508503  | 4.781640261   | -5.830200675 |
| H152  | -5.792902850  | 4.091373089   | -8.434319645 |
| H153  | -4.046123573  | 6.015758591   | -6.949897614 |
| H154  | -7.998591179  | 3.385715345   | -8.279392476 |
| H155  | -5.730116617  | 1.706472712   | -7.281273731 |
| H156  | -8.146397019  | 4.254279296   | -6.732312917 |
| H157  | -4.188843740  | 0.907249742   | -2.447940615 |
| H158  | -4.568993876  | 1.802616901   | -5.125692666 |
| H159  | -5.608944059  | -0.474886110  | -6.459372930 |
| H160  | -7.485089359  | 3.984476670   | -0.987660733 |
| H161  | -6.479077918  | 3.464861408   | -3.657586261 |
| H162  | -7.317607223  | -0.413033156  | -5.959012241 |
| H163  | -3.885981939  | 2.543191331   | -3.055303020 |
| H164  | -8.850527232  | 1.996101239   | -3.704643296 |
| H165  | -8.236286834  | 4.466817660   | -2.530039642 |
| H166  | -5.125081617  | -2.266937636  | -2.286411419 |
| H167  | -3.440791649  | -1.724534418  | -2.143502997 |
| H168  | -3.991781242  | -3.108472038  | -1.189750378 |
| H169  | -4.931534885  | -0.195245061  | -0.859918623 |
| H170  | -10.867237663 | 0.890808202   | -3.759323865 |
| H171  | -4.618812537  | 2.108506347   | 1.615333468  |
| H172  | -9.049460926  | 1.648386050   | 1.220966171  |
| H173  | -8.017606866  | 3.337464407   | 4.062482831  |
| H174  | -2.633173605  | -0.587155210  | -0.042616612 |
| H175  | -3.174148893  | -1.921761490  | 0.979001992  |
| H176  | -3.352526138  | -5.117492035  | 8.188644128  |
| H177  | -4.644359326  | 3.655460201   | 2.493344661  |
| H178  | -6.598804168  | 4.381097532   | 3.817006137  |
| H179  | -4.459205983  | 2.130051552   | 3.396173786  |

|      |               |               |               |
|------|---------------|---------------|---------------|
| H180 | -6.471185670  | 2.930811953   | 4.841403553   |
| H181 | -6.950865630  | 2.979801783   | 1.802784415   |
| H182 | -6.466188524  | 0.572023699   | 3.644286590   |
| H183 | -6.577183630  | 0.796941537   | 0.704941579   |
| H184 | -3.721178471  | -0.263686220  | 1.322589612   |
| H185 | 1.201422383   | 1.436736185   | 3.803546887   |
| H186 | -0.231332275  | 2.476875863   | 4.041920896   |
| H187 | -0.347540362  | 1.593785480   | 5.986384688   |
| H188 | -2.989165677  | 1.335975444   | 6.736025883   |
| H189 | -0.221400499  | -0.752414205  | 6.006181214   |
| H190 | -0.421317985  | -3.208824562  | 5.812351159   |
| H191 | -4.640502474  | -2.937668669  | 6.691791703   |
| H192 | -7.268127286  | -0.719503157  | -1.090961918  |
| H193 | -8.549300851  | -3.001950883  | -2.963265789  |
| H194 | -9.812685993  | -2.855162197  | -1.725126668  |
| H195 | -8.397449112  | -0.572016663  | -3.019903038  |
| H196 | -11.235643025 | 1.468491082   | -2.114382041  |
| H197 | -4.445629570  | -0.469297031  | 6.848351762   |
| H198 | -5.834628346  | -2.747177235  | 0.520132669   |
| H199 | -11.050512248 | 2.133764211   | 3.122349932   |
| H200 | -11.303320865 | 1.489526975   | 1.478484209   |
| H201 | -10.669490376 | -0.888229267  | 2.687099853   |
| H202 | -4.577640024  | -12.648143647 | 2.432909912   |
| H203 | 1.653349100   | -2.240181168  | -6.671156754  |
| H204 | -2.696138625  | -5.755348536  | -5.822070552  |
| H205 | 6.807265506   | -2.683802845  | -8.238036299  |
| H206 | 7.540840151   | -3.299605288  | -6.734257766  |
| H207 | 5.813325871   | -0.793659017  | -7.116301058  |
| H208 | 9.039109732   | 2.725382204   | -3.491092955  |
| H209 | 8.338766439   | -0.726193041  | -7.484957921  |
| H210 | 1.361637191   | 1.348895536   | -4.093457026  |
| H211 | -1.040843089  | 0.405727266   | -5.761560534  |
| H212 | 7.565520734   | 0.650234502   | -4.238085482  |
| H213 | 7.585890811   | 3.260269218   | -5.641870936  |
| H214 | 8.512940154   | -1.227640562  | -4.580470771  |
| H215 | 0.395670845   | -2.358228618  | -5.454764969  |
| H216 | 6.127938390   | -1.448322147  | -5.503676133  |
| H217 | 9.144412580   | -2.130888116  | -5.799580105  |
| H218 | 0.774024611   | 3.583480930   | -6.911158991  |
| H219 | -0.284969720  | 1.487627825   | -3.465739941  |
| H220 | 6.330357431   | -4.407415480  | -5.377647657  |
| H221 | -0.464531357  | -0.578828505  | -4.422817362  |
| H222 | -2.590666785  | 4.882078788   | 1.162600829   |
| H223 | -1.290813097  | 2.480456354   | 1.255282226   |
| H224 | -4.486630523  | 6.707366932   | -2.938987629  |
| H225 | -1.733092151  | 5.779565513   | -3.625386194  |
| H226 | -1.361605928  | 7.907972878   | -0.328923468  |
| H227 | -1.961028852  | 12.190024119  | 2.563409410   |
| H228 | -4.080839367  | 9.332688808   | 0.815324743   |
| H229 | -2.017296942  | 10.560643869  | -0.6912726803 |
| H230 | -1.273460450  | 9.388009946   | 2.057401177   |
| H231 | 1.180709119   | 14.228378287  | 0.580001806   |
| H232 | -0.367153540  | 5.704812225   | 2.020276306   |
| H233 | 0.082871279   | 6.217916266   | 0.389122810   |
| H234 | -0.431704685  | 14.240123048  | 2.561591228   |
| H235 | -0.418418279  | 9.906984477   | -0.351183036  |
| H236 | -1.491367712  | 5.362144670   | -1.441195402  |
| H237 | -4.008450015  | 5.025964872   | -3.207655564  |
| H238 | -0.609528375  | 9.064424568   | -3.840949650  |
| H239 | 2.720687560   | 2.332374806   | -0.059970762  |
| H240 | -1.041959961  | 8.373610426   | -5.415107162  |
| H241 | 0.788274842   | 0.999963644   | 0.827171926   |
| H242 | -1.195638549  | -5.423260576  | 9.140430642   |
| H243 | -0.970577312  | -4.198785953  | 8.078562383   |
| H244 | 3.328306968   | 2.177683516   | 4.830392284   |
| H245 | 1.484402738   | 3.957316191   | 3.473790674   |
| H246 | 2.411959514   | 3.685662371   | 6.881703038   |
| H247 | 2.653934566   | 5.335397098   | 0.329773245   |
| H248 | 3.423244838   | 6.638431686   | -1.304476994  |
| H249 | 2.908835848   | 6.819821580   | 0.848567274   |
| H250 | 3.691878984   | 5.104678546   | -3.064819917  |
| H251 | 3.238247639   | 6.438181682   | -4.158073138  |
| H252 | 5.133173407   | 7.240717978   | 8.357076664   |
| H253 | 5.030936751   | 8.991381367   | 8.669476665   |
| H254 | 5.510644222   | 6.603041514   | 6.176741549   |
| H255 | 5.194608286   | 7.659654489   | 4.818783171   |
| H256 | 8.198143600   | 7.617023298   | 2.785869191   |
| H257 | 6.757580306   | 4.351096565   | 0.202194341   |
| H258 | 2.589421370   | 10.946639037  | 2.237425069   |
| H259 | 0.025447098   | 7.769914540   | 5.084961906   |

|      |              |               |              |
|------|--------------|---------------|--------------|
| H260 | 4.725205143  | 7.815954986   | 2.241182659  |
| H261 | 5.347119249  | 1.730884499   | 3.236407452  |
| H262 | 5.516959606  | 2.035029304   | 5.703154052  |
| H263 | 4.643930382  | 3.398106549   | 1.498978055  |
| H264 | 0.386269911  | 6.578518914   | -5.029884077 |
| H265 | 7.368137701  | 2.959007316   | 8.189909884  |
| H266 | 1.995988273  | 4.310375090   | -4.737740688 |
| H267 | 6.959463419  | 2.445827314   | 3.301465589  |
| H268 | 1.457187525  | 6.908423886   | 3.270766204  |
| H269 | 3.067028411  | 9.059696208   | 0.963501612  |
| H270 | 5.840029691  | 3.682669772   | 8.732781964  |
| H271 | 8.439034104  | 6.179780347   | 1.855868974  |
| H272 | 6.164453152  | 8.723130651   | 2.477729007  |
| H273 | 1.405226987  | 2.084953297   | -6.552620235 |
| H274 | -0.922326788 | 2.807315376   | -5.519675921 |
| H275 | 1.236407252  | 11.807590417  | 4.123008378  |
| H276 | 1.466271442  | 5.123353202   | -2.013930539 |
| H277 | 6.020502382  | 4.570102593   | 4.225468068  |
| H278 | 7.524910282  | 4.363531564   | 1.799136089  |
| H279 | 5.988013835  | 2.360755499   | 1.044633240  |
| H280 | 4.907260628  | 5.772729326   | 1.247452101  |
| H281 | -0.034570867 | 5.084955559   | 7.633713195  |
| H282 | 2.868541612  | 6.470136664   | 7.078708412  |
| H283 | 3.141231934  | 7.800544202   | 9.657982203  |
| H284 | 1.017183675  | 4.089527940   | 8.664542490  |
| H285 | 1.278624931  | 8.582226324   | 6.903609566  |
| H286 | 8.631913115  | -6.038530285  | -1.699691586 |
| H287 | 7.447005146  | -6.859197510  | -2.736516526 |
| H288 | 3.866894413  | -9.489232129  | -0.334667018 |
| H289 | 9.613843558  | -7.578935234  | -3.402586355 |
| H290 | 9.145435749  | -6.513782185  | -4.556236430 |
| H291 | 2.929447220  | -1.398711187  | 6.927137138  |
| H292 | 2.214047451  | 0.511410016   | 9.234473796  |
| H293 | 6.318174858  | 0.895458100   | 7.998224165  |
| H294 | 2.284773276  | 0.259416203   | 6.736806197  |
| H295 | 3.453698002  | 0.017530832   | 10.179289077 |
| H296 | 7.437340470  | -2.133528004  | 4.115647199  |
| H297 | 4.773771501  | -0.595966157  | 8.323344359  |
| H298 | -5.881979184 | -7.713997118  | -0.693210689 |
| H299 | -3.869817540 | -10.002261666 | -1.000633586 |
| H300 | 7.323447528  | -2.400334820  | 1.696278238  |
| H301 | -2.882064785 | -3.287976703  | 3.802264968  |
| H302 | 8.559969435  | 0.059565221   | -0.541484018 |
| H303 | 3.690416346  | -1.165863059  | -3.907538401 |
| H304 | 6.986253805  | 0.475134897   | 0.136762957  |
| H305 | -4.685591741 | -5.523954989  | 0.221451292  |
| H306 | 6.510946105  | -2.123624503  | -0.202007664 |
| H307 | -3.132561760 | -5.950308736  | -0.500983737 |
| H308 | -4.365502110 | -7.713293097  | -1.620491035 |
| H309 | -3.140546906 | -8.138833028  | 0.649946557  |
| H310 | -4.684201915 | -7.760450257  | 1.439622067  |
| H311 | 5.258344899  | 2.952016157   | -5.641381206 |
| H312 | -6.635181602 | -9.648830677  | -2.102223190 |
| H313 | -5.956714565 | -10.366562536 | -4.985365804 |
| H314 | 4.019950906  | -1.004479943  | -1.442652995 |
| H315 | -8.207042651 | -11.213835469 | -3.329277870 |
| H316 | -8.171778353 | -10.158982211 | -4.582605570 |
| H317 | -2.037027265 | -5.736616417  | 1.553128373  |
| H318 | 4.811774849  | 1.094260401   | -0.432287402 |
| H319 | 4.372344257  | 0.737636346   | -5.368178005 |
| H320 | -0.549921194 | -11.933492607 | -3.377045384 |
| H321 | 2.376040284  | -10.348484642 | -2.872118911 |
| H322 | -1.538676328 | -9.974374572  | -2.284311687 |
| H323 | 0.237152567  | -11.804042883 | -4.700515745 |
| H324 | 9.990550341  | -3.213556011  | 2.820937964  |
| H325 | -0.378419997 | -8.096028951  | 0.009486578  |
| H326 | -2.615262219 | -6.116964979  | -3.672199424 |
| H327 | 7.153765755  | -4.332587868  | -1.363097716 |
| H328 | -1.388514157 | -7.730110018  | -5.200697846 |
| H329 | 5.373179554  | -7.262389956  | -5.127488823 |
| H330 | 3.979641250  | -5.500488870  | -3.930672550 |
| H331 | -6.300743179 | -12.013111476 | -4.438008637 |
| H332 | -1.580669905 | -4.050547046  | 2.922397941  |
| H333 | -1.396408712 | -10.064312584 | 0.840573930  |
| H334 | 0.025621985  | -8.033748328  | 1.507232676  |
| H335 | -3.608518665 | -10.932222755 | 0.961486244  |
| H336 | -5.474095296 | -4.915666861  | 2.026568340  |
| H337 | 0.732474710  | -9.188038728  | -8.157899685 |
| H338 | 1.669914075  | -7.821177999  | -5.022549620 |
| H339 | 0.620814541  | -8.982303460  | -4.183903491 |

|       |              |               |              |
|-------|--------------|---------------|--------------|
| H340  | -0.226876374 | -6.535031257  | -5.848846104 |
| H341  | 5.530102715  | -2.840750472  | -2.263356526 |
| H342  | 5.522658462  | 3.008978339   | -1.892777138 |
| H343  | 5.589870822  | 4.016310062   | -4.253195172 |
| H344  | -1.632980287 | -4.973209871  | -2.697442659 |
| H345  | -1.714525092 | -11.018210795 | -0.350375219 |
| H346  | -2.529288630 | -11.157485196 | -2.465657900 |
| H347  | -5.140291465 | -3.346572926  | 2.692684095  |
| H348  | 4.892333876  | -9.626733240  | -4.249397450 |
| H349  | 1.805592071  | -9.121549370  | -1.72577574  |
| H350  | 6.551791156  | -2.620899082  | -3.717354308 |
| H351  | 8.737574121  | -0.939615794  | 3.863926452  |
| H352  | -3.607952996 | -5.073055934  | 5.750068939  |
| H353  | -1.843806429 | -5.159638454  | 5.521732052  |
| H354  | 5.206075086  | -11.369086217 | -0.762743521 |
| H355  | 4.351805854  | -11.801769258 | -2.088844827 |
| H356  | 0.335522129  | -13.516451932 | -0.761067660 |
| H357  | 1.472063781  | -11.812660040 | -1.785892938 |
| H358  | 2.763028507  | -13.981433973 | 0.435991752  |
| H359  | 0.134499243  | -12.376106778 | 0.588321303  |
| H360  | -1.727646132 | -7.460727273  | 7.017716344  |
| H361  | -0.453515860 | 10.384554348  | 9.067204049  |
| H362  | -6.142483675 | -11.803160633 | 2.327714282  |
| H363  | -4.576419119 | -9.811151862  | 3.549155925  |
| H364  | 1.455358366  | 11.387263685  | 6.910074577  |
| H365  | -1.022135891 | 9.678818154   | 6.237944445  |
| H366  | -0.705206479 | 11.345679299  | 5.715727076  |
| H367  | 1.704733745  | 0.043593051   | 1.859080608  |
| H368  | 0.233589300  | -0.695796879  | -0.794944589 |
| H369  | 0.487371927  | -2.855239179  | -1.860001475 |
| Mo370 | 1.603063189  | -5.802398044  | -1.562429328 |
| N371  | -1.643894492 | 1.156977468   | -8.914192260 |
| N372  | -3.384258846 | 4.281306905   | -7.886022069 |
| N373  | -6.190616941 | 4.057332008   | -7.499096979 |
| N374  | -6.536512069 | 1.365598731   | -6.758831884 |
| N375  | -5.039576455 | 1.373581432   | -4.326816804 |
| N376  | -6.679558132 | 3.103974503   | -2.720989788 |
| N377  | -9.289943322 | 1.838166579   | -2.794511845 |
| N378  | -9.101106895 | -1.040929388  | -2.439921100 |
| N379  | -7.105670154 | -1.593112072  | -0.593727776 |
| N380  | -6.617125384 | 0.296786482   | 1.596580483  |
| N381  | -9.348523419 | 1.304763267   | 2.136225793  |
| N382  | -7.658414025 | -10.462780187 | -3.753936308 |
| N383  | -5.669274356 | -9.984307848  | -2.020734943 |
| N384  | -3.045172780 | -5.554969372  | 1.532567012  |
| N385  | -4.797916640 | -4.291449008  | 2.454398623  |
| N386  | -2.585808221 | -3.807859299  | 2.979013786  |
| N387  | -4.626122057 | -10.946336831 | 1.191777480  |
| N388  | 1.137787836  | 3.000595332   | -6.153044692 |
| N389  | 1.006094602  | -1.777843639  | -6.034674302 |
| N390  | 1.302073015  | 4.618553007   | -4.042932734 |
| N391  | 0.117383831  | 7.129151208   | -4.218545246 |
| N392  | -2.502237187 | 6.448752834   | -3.514092367 |
| N393  | -2.249404420 | 5.593561882   | -0.798262554 |
| N394  | 1.462157670  | 4.061649578   | 0.263081941  |
| N395  | 0.713827751  | 2.009453474   | 0.613730565  |
| N396  | -1.886179529 | 8.064282998   | 0.532140980  |
| N397  | 0.223233917  | 12.369354261  | 0.055190181  |
| N398  | -0.403281896 | 13.513798981  | 1.851452591  |
| N399  | -1.184541602 | -5.197950068  | 8.142723586  |
| N400  | 2.971954040  | -0.176604069  | 9.296704775  |
| N401  | 5.710461552  | 1.708522019   | 8.044998417  |
| N402  | 5.766869186  | 3.026067017   | 5.569075307  |
| N403  | 5.896136161  | 5.679447423   | 1.566809166  |
| N404  | 7.799938056  | 6.790755058   | 2.352071199  |
| N405  | 5.718757229  | 7.808582860   | 2.488921986  |
| N406  | 3.045375839  | 3.142603034   | 4.590461631  |
| N407  | 1.716794768  | 4.421297478   | 6.720203892  |
| N408  | 2.473075934  | 6.875243050   | 7.927946565  |
| N409  | 5.155090450  | 7.498992508   | 5.824909035  |
| N410  | 1.361358421  | 9.376459333   | 7.535325223  |
| N411  | 9.432852925  | -6.588041979  | -3.575550109 |
| N412  | 7.258172393  | -4.005598638  | -2.333785428 |
| N413  | 7.165070739  | -1.463032991  | -0.664502738 |
| N414  | 7.968769840  | -1.719896089  | 2.110555300  |
| N415  | 8.891915027  | -1.175904367  | -5.534825160 |
| N416  | 7.551878299  | 1.311764692   | -5.020404040 |
| N417  | 4.669816949  | -10.990543004 | -1.548730266 |
| N418  | 3.177236690  | -7.165384359  | -2.825727883 |
| N419  | 4.723036161  | -7.473117051  | -4.375254130 |

|                 |               |                                       |              |
|-----------------|---------------|---------------------------------------|--------------|
| N420            | 1.697450469   | -11.956242563                         | -0.803323766 |
| N421            | -0.449222695  | -0.909367590                          | 1.626314294  |
| N422            | -0.425810684  | -2.051262705                          | 1.580568836  |
| O423            | -3.530709979  | 2.198270557                           | -6.975808764 |
| O424            | -5.868968780  | 4.469998677                           | -5.280951856 |
| O425            | -8.512315473  | 1.939825385                           | -5.762812948 |
| O426            | -6.505470096  | -0.200934104                          | -3.582611657 |
| O427            | -5.958404981  | 1.886098615                           | -0.940092458 |
| O428            | -9.483229453  | 2.505685953                           | -0.618270729 |
| O429            | -11.229448310 | -0.970306948                          | -1.581952409 |
| O430            | -7.631803581  | -3.831046018                          | -0.570647180 |
| O431            | -6.042606371  | -1.621538086                          | 2.708868132  |
| O432            | -8.866209612  | 0.606650855                           | 4.239382757  |
| O433            | -12.267479861 | -0.098558504                          | 3.683918150  |
| O434            | -4.177484275  | -11.365098559                         | -3.129769726 |
| O435            | -6.735350908  | -10.246442528                         | 0.603066017  |
| O436            | -4.744728772  | -11.439267103                         | 4.765388437  |
| O437            | -0.806550186  | 4.122353280                           | -3.301052322 |
| O438            | 1.567425063   | 0.254763352                           | -6.884614018 |
| O439            | 0.338196856   | 7.385226261                           | -1.961032857 |
| O440            | 3.486660671   | 7.013791793                           | -2.226522700 |
| O441            | -3.134484124  | 8.658043925                           | -3.602247543 |
| O442            | -4.482761431  | 5.973749048                           | -0.524813779 |
| O443            | -2.939033555  | 7.128095841                           | 2.319422328  |
| O444            | -3.627751199  | 10.492591399                          | 2.429999231  |
| O445            | -3.717866169  | -7.553430820                          | 7.474706555  |
| O446            | -2.140790702  | 0.905864787                           | 6.523487721  |
| O447            | 3.567711811   | 2.473799880                           | 8.142156738  |
| O448            | 6.375037415   | 4.988822060                           | 6.596767688  |
| O449            | 3.663028085   | 5.169599798                           | 3.739971382  |
| O450            | 0.085964931   | 5.119746470                           | 5.264577209  |
| O451            | 0.604921589   | 1.669566482                           | 5.783542760  |
| O452            | 1.079820298   | 6.475788058                           | 9.697326785  |
| O453            | 2.641225603   | 10.300939284                          | 9.182644994  |
| O454            | 4.341818124   | 9.603621802                           | 6.180471909  |
| O455            | -0.431040321  | 12.332048393                          | 8.447829223  |
| O456            | 2.886657771   | 8.352315896                           | 1.612211701  |
| O457            | 7.732107693   | -4.606515600                          | -4.499936817 |
| O458            | 7.890704875   | -0.722735450                          | -2.709509115 |
| O459            | 8.900432110   | 0.365732380                           | 1.993600796  |
| O460            | 9.609282546   | -3.467518264                          | 4.809569475  |
| O461            | 7.552948796   | 1.602483462                           | -7.283757931 |
| O462            | 4.408237671   | -3.527337938                          | -7.606996961 |
| O463            | 5.441598293   | -4.439131005                          | -5.849454392 |
| O464            | 7.732708652   | 4.167536131                           | -2.891019763 |
| O465            | 2.835012664   | -11.334209069                         | 1.054685765  |
| O466            | 1.291756693   | -14.413261702                         | 1.782087781  |
| O467            | -1.168875053  | -3.394903489                          | -4.708670009 |
| O468            | -2.318476705  | -4.860765901                          | -5.924915121 |
| O469            | 0.554423178   | -10.440329410                         | -6.255135612 |
| O470            | 0.764184753   | -8.526083445                          | -7.434687709 |
| O471            | 0.169099620   | -7.562663196                          | -1.613899677 |
| O472            | -1.674912814  | -8.329357741                          | -2.661511196 |
| O473            | 0.722730672   | -5.790130312                          | -3.470923878 |
| O474            | -1.842282206  | -10.925854782                         | 0.631653348  |
| O475            | -0.690962144  | -8.339820824                          | 0.920125339  |
| O476            | 3.334636282   | 6.089751500                           | 0.348479991  |
| O477            | 0.053940242   | -12.438988960                         | -3.976999932 |
| O478            | -1.607793153  | -10.965591208                         | -2.150447612 |
| S479            | 4.262103032   | -0.084363060                          | 5.365704797  |
| S480            | 4.026359761   | -0.859166731                          | 1.758432028  |
| S481            | 2.943202590   | -3.915260448                          | -2.146215775 |
| S482            | 1.470947515   | -1.700804866                          | 3.874181288  |
| S483            | 1.554701058   | -1.013471578                          | -0.673729262 |
| S484            | 5.670715957   | -4.175009868                          | 0.517787672  |
| S485            | -0.240625401  | -4.677593340                          | -0.492270687 |
| S486            | 4.079946807   | -3.764642273                          | 3.956196944  |
| S487            | 2.758226729   | -6.662526909                          | 0.346143055  |
| S488            | 0.510462593   | -5.232083271                          | 3.159329867  |
| <b>20 (S=1)</b> |               | <b>bm202b2x6x2n22nconexadtd.car_3</b> |              |
| Fe(139) 2.172   | C1            | -2.920674081                          | 0.625736582  |
| Fe(140) -0.109  | C2            | -3.718736267                          | 1.297706776  |
| Fe(141) 2.365   | C3            | -4.747689091                          | 3.372372581  |
| Fe(142) -2.664  | C4            | -6.129551524                          | 2.864646215  |
| Fe(143) 3.146   | C5            | -8.173809160                          | 1.691952691  |
|                 | C6            | -8.108741770                          | 0.481338565  |
|                 | C7            | -6.767579909                          | -1.426591243 |
|                 | C8            | -6.285340365                          | -0.944988905 |
|                 | C9            | -4.957954744                          | 0.665772057  |

Fe(144) -2.429

Fe(145) -0.899

|     |               |               |              |
|-----|---------------|---------------|--------------|
| C10 | -6.116616581  | 1.212595292   | -2.423777478 |
| C11 | -8.193636479  | 2.468987586   | -2.346745127 |
| C12 | -9.211077434  | 1.409611607   | -1.899355841 |
| C13 | -10.667076222 | -0.434713390  | -2.562388192 |
| C14 | -10.324456207 | -1.692726079  | -1.753027092 |
| C15 | -8.699493773  | -3.495801716  | -1.363567544 |
| C16 | -7.605818897  | -3.427392028  | -0.293555378 |
| C17 | -5.671515991  | -2.184239117  | 0.602559246  |
| C18 | -6.023887698  | -1.335874007  | 1.837271014  |
| C19 | -4.425409547  | -1.666445528  | -0.160235251 |
| C20 | -3.273315640  | -1.276272101  | 0.766243773  |
| C21 | -3.962028300  | -2.702705431  | -1.191926325 |
| C22 | -7.127421550  | 0.732928389   | 2.647781919  |
| C23 | -8.580489831  | 0.386633891   | 3.027835050  |
| C24 | -6.951162949  | 2.220612722   | 2.258157492  |
| C25 | -7.593475837  | 3.145668722   | 3.298615761  |
| C26 | -5.466384286  | 2.553092411   | 2.077195311  |
| C27 | -10.890570480 | 0.102783364   | 2.343308639  |
| C28 | -11.075335474 | -1.136875664  | 3.194409914  |
| C29 | -5.321471526  | -12.107912721 | -1.546908469 |
| C30 | -4.270234001  | -11.639225131 | -0.541480225 |
| C31 | -3.894976230  | -10.013264629 | 1.318772707  |
| C32 | -4.381655755  | -10.469523033 | 2.707153347  |
| C33 | -3.989172477  | -8.487522553  | 1.139311744  |
| C34 | -3.212317273  | -7.677064102  | 2.182089894  |
| C35 | -2.948229954  | -6.264795239  | 1.656734507  |
| C36 | -2.811932764  | -4.292421724  | 3.174271572  |
| C37 | -3.671576674  | -11.293185852 | 4.906990232  |
| C38 | -3.186944527  | -10.337242445 | 5.974235177  |
| C39 | -0.556843056  | 1.667533466   | -5.668674732 |
| C40 | -0.762477851  | 3.027451923   | -4.981448499 |
| C41 | -0.106802573  | 0.659628508   | -4.583826504 |
| C42 | -0.219973032  | -0.835690728  | -4.950787138 |
| C43 | 0.984345046   | -1.438001716  | -5.672371280 |
| C44 | 0.487991649   | 5.023743704   | -4.234530651 |
| C45 | -0.419912097  | 6.218388165   | -4.533504647 |
| C46 | 1.963477751   | 5.472802741   | -4.244074619 |
| C47 | -2.300304806  | 7.092113424   | -5.827073162 |
| C48 | -3.547741868  | 6.854408516   | -4.961546421 |
| C49 | -4.736510534  | 5.349168469   | -3.434155785 |
| C50 | -4.502219551  | 5.609514818   | -1.940619126 |
| C51 | -2.938496350  | 5.573495042   | -0.052437803 |
| C52 | -3.112809098  | 6.998785932   | 0.496062360  |
| C53 | -1.491624775  | 5.146579655   | 0.265474477  |
| C54 | -1.090053682  | 3.842581927   | -0.342603059 |
| C55 | -1.788650325  | 2.713914879   | -0.730410941 |
| C56 | 0.272858498   | 2.293246365   | -1.170830901 |
| C57 | -2.672846193  | 9.375196675   | 0.056235810  |
| C58 | -4.037307361  | 9.772529542   | 0.621972261  |
| C59 | -2.332486661  | 10.223300243  | -1.187182038 |
| C60 | -1.878683913  | 11.631610578  | -0.936165338 |
| C61 | -2.153646592  | 12.501698547  | 0.100422515  |
| C62 | -0.822665594  | 13.466156317  | -1.385347536 |
| C63 | -1.429133035  | -4.491512033  | 8.454408496  |
| C64 | -1.514634182  | -6.005838919  | 8.470058961  |
| C65 | -1.757086572  | -4.023809346  | 7.010934117  |
| C66 | -1.794812527  | -2.518361415  | 6.898584763  |
| C67 | -2.961055648  | -1.788465918  | 7.192371908  |
| C68 | -0.647928159  | -1.800230176  | 6.518480294  |
| C69 | -2.986992724  | -0.392008370  | 7.104358413  |
| C70 | -0.654577251  | -0.407552608  | 6.439701335  |
| C71 | -1.825427163  | 0.296805903   | 6.731450761  |
| C72 | 4.158316414   | 1.642658469   | 8.054889459  |
| C73 | 4.512349838   | 3.114908244   | 7.801733912  |
| C74 | 3.613864193   | 0.993866336   | 6.771677874  |
| C75 | 6.329262654   | 4.726527892   | 7.400291656  |
| C76 | 6.078632499   | 5.270476835   | 5.992591116  |
| C77 | 5.393384651   | 4.760741457   | 3.675785335  |
| C78 | 3.879478482   | 5.028547049   | 3.535498249  |
| C79 | 5.906274681   | 3.695102346   | 2.689588204  |
| C80 | 5.587613665   | 3.904986178   | 1.205658595  |
| C81 | 6.308207920   | 5.060609866   | 0.493765052  |
| C82 | 6.013777097   | 7.501845338   | 0.925526824  |
| C83 | 1.593519146   | 4.321332971   | 3.979207334  |
| C84 | 1.011030206   | 5.404173196   | 4.905441449  |
| C85 | 0.808650561   | 3.019672169   | 4.214650222  |
| C86 | 0.992969629   | 6.267477078   | 7.193361897  |
| C87 | 1.495653345   | 7.632471644   | 7.648277219  |
| C88 | 2.985685530   | 9.541520590   | 7.232113254  |
| C89 | 2.116867098   | 10.780937351  | 6.931434440  |

|       |              |               |               |
|-------|--------------|---------------|---------------|
| C90   | 4.400983283  | 9.698049085   | 6.641173467   |
| C91   | 4.389233720  | 9.777190701   | 5.116282503   |
| C92   | 0.301656748  | 11.725528344  | 5.587048149   |
| C93   | -0.421881705 | 12.430467818  | 6.724424412   |
| C94   | -0.731525356 | 11.228243956  | 4.540582926   |
| C95   | -0.051199696 | 10.576955964  | 3.359091140   |
| C96   | 0.516873271  | 11.364530592  | 2.344174779   |
| C97   | 0.100171784  | 9.182161378   | 3.282966593   |
| C98   | 1.233752656  | 10.782497425  | 1.298374268   |
| C99   | 0.830452191  | 8.584011783   | 2.250765420   |
| C100  | 1.398954053  | 9.395992114   | 1.270065970   |
| C101  | 8.686721910  | -5.881473955  | -2.279706480  |
| C102  | 7.894657195  | -4.805408707  | -3.002832379  |
| C103  | 6.508953371  | -2.769262307  | -2.699921245  |
| C104  | 7.066422507  | -1.379759791  | -2.389171919  |
| C105  | 7.153838008  | 0.407360458   | -0.701656935  |
| C106  | 8.047422387  | 0.445690165   | 0.538109728   |
| C107  | 8.940972905  | -0.723655828  | 2.496601217   |
| C108  | 10.282691235 | -1.415386149  | 2.390004751   |
| C109  | 7.636940844  | -1.282091649  | -6.911034919  |
| C110  | 7.520614694  | 0.246248029   | -6.875927730  |
| C111  | 6.249986276  | -1.914634782  | -6.644201276  |
| C112  | 6.222703135  | -3.411690670  | -7.005427991  |
| C113  | 5.024150302  | -4.098027565  | -6.383080933  |
| C114  | 7.342880021  | 2.259839476   | -5.509921564  |
| C115  | 8.255476417  | 2.723847874   | -4.395728165  |
| C116  | 5.938982428  | 2.910904514   | -5.523187093  |
| C117  | 5.120885471  | 2.581615662   | -4.305678991  |
| C118  | 4.983474273  | 3.516459404   | -3.266544226  |
| C119  | 4.535519279  | 1.314956185   | -4.155681834  |
| C120  | 4.319206010  | 3.174819113   | -2.084311444  |
| C121  | 3.897307834  | 0.962779582   | -2.964326860  |
| C122  | 3.804433292  | 1.885511515   | -1.917080767  |
| C123  | 4.534269654  | -10.048345932 | 0.417669501   |
| C124  | 3.834119432  | -10.819975102 | 1.545182347   |
| C125  | 3.534351496  | -9.477609237  | -0.599157295  |
| C126  | 4.117600813  | -8.550334155  | -1.619467617  |
| C127  | 5.039205464  | -8.847147467  | -2.604605303  |
| C128  | 4.336388627  | -6.761938829  | -2.850432974  |
| C129  | 2.196176509  | -12.487272256 | 2.215612907   |
| C130  | 3.166776004  | -13.246764974 | 3.093186668   |
| C131  | -1.531608124 | -5.454243221  | -3.829316124  |
| C132  | -1.329183063 | -6.166060547  | -2.520539882  |
| C133  | 0.001405942  | -7.022128439  | -2.466095689  |
| C134  | 0.024609425  | -8.027922304  | -3.650959299  |
| C135  | 1.211637801  | -8.997674275  | -3.556283986  |
| C136  | 1.170972542  | -10.123844869 | -4.547276095  |
| C137  | -0.077301342 | -7.864671880  | -1.153338507  |
| C138  | 2.850469574  | -2.937986116  | 1.478703319   |
| Fe139 | 4.010576849  | -4.169605098  | 0.431227215   |
| Fe140 | 2.021944166  | -0.897817691  | 1.586252603   |
| Fe141 | 2.555638687  | -2.759372033  | 3.382869475   |
| Fe142 | 4.671060804  | -2.314546444  | 2.007476231   |
| Fe143 | 4.094664722  | -0.494359644  | 3.811244999   |
| Fe144 | 1.885365407  | -4.668721922  | 1.809749235   |
| Fe145 | 1.789323774  | -3.106868828  | -0.322370576  |
| H146  | -2.666453411 | -1.154093240  | -8.341497112  |
| H147  | -1.329191634 | -0.209730783  | -8.324702560  |
| H148  | -3.708510777 | 3.083620783   | -9.203945668  |
| H149  | -2.289033034 | 1.373486603   | -9.809489297  |
| H150  | -3.663139144 | 0.297757792   | -10.055192321 |
| H151  | -4.144365122 | 3.390241048   | -6.439766644  |
| H152  | -6.489254884 | 2.169560904   | -8.852535899  |
| H153  | -4.854040938 | 4.403372210   | -7.723064357  |
| H154  | -8.655830803 | 1.387665659   | -8.535246316  |
| H155  | -6.286080610 | -0.029774299  | -7.436360757  |
| H156  | -8.807355250 | 2.443603964   | -7.106969827  |
| H157  | -4.435857625 | -0.079446319  | -2.656285699  |
| H158  | -4.998629184 | 0.414856512   | -5.406086159  |
| H159  | -6.007947684 | -2.082155283  | -6.347332685  |
| H160  | -7.854714858 | 2.982567769   | -1.437515613  |
| H161  | -6.936376321 | 2.163927764   | -4.071922983  |
| H162  | -7.677127674 | -2.015509913  | -5.733861434  |
| H163  | -4.247409727 | 1.473644566   | -3.500790113  |
| H164  | -9.208309529 | 0.545306574   | -3.782000620  |
| H165  | -8.705181572 | 3.199142943   | -2.989179918  |
| H166  | -4.766228270 | -2.975541195  | -1.890989364  |
| H167  | -3.117116973 | -2.309807498  | -1.778046756  |
| H168  | -3.612405990 | -3.619097512  | -0.689104746  |
| H169  | -4.747506539 | -0.751394755  | -0.682408643  |

|      |               |               |              |
|------|---------------|---------------|--------------|
| H170 | -11.080724498 | -0.761939383  | -3.526902214 |
| H171 | -4.997222261  | 1.925926775   | 1.306481329  |
| H172 | -9.272578215  | 0.643765816   | 1.070253184  |
| H173 | -8.678268179  | 2.986000400   | 3.381815981  |
| H174 | -2.474066002  | -0.805433004  | 0.178894622  |
| H175 | -2.834197877  | -2.150063045  | 1.265704021  |
| H176 | -2.229993120  | -4.111864843  | 9.118087181  |
| H177 | -5.350184647  | 3.606672467   | 1.781671925  |
| H178 | -7.427759119  | 4.196595041   | 3.018055850  |
| H179 | -4.920377305  | 2.403599151   | 3.022717171  |
| H180 | -7.147888359  | 2.985513313   | 4.293286677  |
| H181 | -7.465846340  | 2.379216753   | 1.293147113  |
| H182 | -6.537842734  | 0.522508842   | 3.550541137  |
| H183 | -6.728801083  | 0.159659025   | 0.622578941  |
| H184 | -3.578147449  | -0.557644329  | 1.540888392  |
| H185 | 1.281643254   | 2.202592763   | 3.641704125  |
| H186 | -0.208149538  | 3.175471583   | 3.823223143  |
| H187 | -0.132174149  | 2.431568779   | 5.844354725  |
| H188 | -2.668378813  | 2.046989507   | 6.768020720  |
| H189 | 0.238432610   | 0.124359484   | 6.109698836  |
| H190 | 0.259085224   | -2.337233083  | 6.229080849  |
| H191 | -3.873421029  | -2.317648721  | 7.480675357  |
| H192 | -6.912045192  | -1.648506988  | -1.057778193 |
| H193 | -8.348925749  | -4.195169468  | -2.138968795 |
| H194 | -9.583708821  | -3.937381911  | -0.887893210 |
| H195 | -8.480509793  | -1.832261245  | -2.686824879 |
| H196 | -11.460485971 | 0.078376652   | -2.004199884 |
| H197 | -3.909277798  | 0.156321449   | 7.313716031  |
| H198 | -5.470324690  | -3.188455429  | 0.997769305  |
| H199 | -11.362526909 | 0.959484505   | 2.851120467  |
| H200 | -11.422868013 | -0.069656888  | 1.394438509  |
| H201 | -10.320296125 | -1.940272776  | 3.030792217  |
| H202 | -3.240956338  | -12.290804302 | 5.084307316  |
| H203 | 2.087795648   | -3.162882044  | -5.791852462 |
| H204 | -2.642818305  | -6.935853964  | -4.370878571 |
| H205 | 6.150688681   | -3.520896061  | -8.097309151 |
| H206 | 7.151204884   | -3.898730547  | -6.673755389 |
| H207 | 5.476227269   | -1.393145729  | -7.229450300 |
| H208 | 9.075518422   | 2.010826081   | -4.142730948 |
| H209 | 7.922470761   | -1.506631407  | -7.949233667 |
| H210 | 0.932239411   | 0.898895481   | -4.303211402 |
| H211 | -1.101414929  | -1.003914724  | -5.594099660 |
| H212 | 7.413041103   | 0.237000743   | -4.795492112 |
| H213 | 7.846109967   | 2.630308040   | -6.427868530 |
| H214 | 8.473993209   | -1.658557516  | -5.055136535 |
| H215 | 0.766746032   | -3.225600485  | -4.634101999 |
| H216 | 5.993006523   | -1.766783713  | -5.583588997 |
| H217 | 8.932353395   | -2.720973083  | -6.219738034 |
| H218 | 0.020487031   | 2.047853473   | -7.623697386 |
| H219 | -0.722138645  | 0.834414122   | -3.689160550 |
| H220 | 6.223432270   | -4.795078678  | -4.987851623 |
| H221 | -0.407150358  | -1.408840844  | -4.030803953 |
| H222 | -3.656195275  | 4.942224201   | 0.492150953  |
| H223 | -2.861423974  | 2.540557706   | -0.670939026 |
| H224 | -5.599010521  | 5.959181311   | -3.729620754 |
| H225 | -2.877801337  | 4.957132344   | -4.424106960 |
| H226 | -2.471382337  | 7.729089108   | -1.310451878 |
| H227 | -2.741076426  | 12.395667472  | 1.004772052  |
| H228 | -4.896130075  | 9.280201695   | 0.104074688  |
| H229 | -3.198390907  | 10.215168139  | -1.873808911 |
| H230 | -1.911485956  | 9.519509383   | 0.839993676  |
| H231 | -0.208072347  | 14.231742928  | -1.853388551 |
| H232 | -1.404868349  | 5.116464528   | 1.363864740  |
| H233 | -0.802523204  | 5.934410489   | -0.081117320 |
| H234 | -1.456987304  | 14.509085512  | 0.358633190  |
| H235 | -1.515427139  | 9.714332560   | -1.723095572 |
| H236 | -2.526100117  | 5.029038989   | -2.074309201 |
| H237 | -5.018145420  | 4.292133923   | -3.559107427 |
| H238 | -1.949583304  | 8.107663736   | -5.604146276 |
| H239 | 1.202304405   | 1.822628847   | -1.477192549 |
| H240 | -2.603670279  | 7.067209487   | -6.882206725 |
| H241 | 0.024947975   | -4.151772105  | 9.857166651  |
| H242 | 0.066315412   | -3.099473142  | 8.604491400  |
| H243 | 3.403855967   | 3.247191280   | 4.497503166  |
| H244 | 1.392067207   | 4.663645359   | 2.952869342  |
| H245 | 2.420484395   | 4.973797137   | 6.333329929  |
| H246 | 1.036996981   | 4.141466254   | -0.427982981 |
| H247 | 2.743321976   | 6.423187369   | -1.642869883 |
| H248 | 2.406470179   | 7.188697017   | -0.312489450 |
| H249 | 2.598892642   | 4.624809870   | -3.951979876 |



|      |              |               |              |
|------|--------------|---------------|--------------|
| H250 | 2.245827532  | 5.790089075   | -5.263591495 |
| H251 | 5.023895362  | 8.865056180   | 6.999377016  |
| H252 | 4.820344585  | 10.639216584  | 7.024240378  |
| H253 | 5.278842543  | 7.877195466   | 4.958836558  |
| H254 | 4.789316901  | 8.645116330   | 3.455650374  |
| H255 | 7.604301391  | 8.600550910   | 1.607078130  |
| H256 | 6.479589786  | 4.795724685   | -0.561301859 |
| H257 | 1.674107366  | 11.406086720  | 0.515960840  |
| H258 | -0.358220882 | 8.531971684   | 4.034437206  |
| H259 | 4.164505376  | 8.394213456   | 0.879226498  |
| H260 | 5.485612829  | 2.720910539   | 2.984932763  |
| H261 | 5.601244231  | 3.384633803   | 5.301064124  |
| H262 | 4.500895706  | 3.989885463   | 1.049113091  |
| H263 | -1.150886900 | 5.314877150   | -6.200239732 |
| H264 | 7.413200255  | 4.747417687   | 7.580924236  |
| H265 | 1.060994270  | 3.481707253   | -5.674725501 |
| H266 | 6.998141117  | 3.620115910   | 2.819493718  |
| H267 | 0.970942823  | 7.502169906   | 2.228711848  |
| H268 | 1.366670364  | 7.082268867   | -3.312339764 |
| H269 | 5.860229915  | 5.442249167   | 8.090088171  |
| H270 | 8.033185203  | 7.084815571   | 0.885140409  |
| H271 | 5.501018536  | 9.473937213   | 0.967374613  |
| H272 | 0.934030458  | 0.872819404   | -6.842994903 |
| H273 | -1.558801480 | 1.357800031   | -6.020383713 |
| H274 | 0.404214311  | 12.451446236  | 2.375757969  |
| H275 | 0.229626999  | 4.733743251   | -3.200773010 |
| H276 | 5.871656196  | 5.729448081   | 3.482429293  |
| H277 | 7.295760429  | 5.212989801   | 0.948259589  |
| H278 | 5.893532511  | 2.981895557   | 0.693831592  |
| H279 | 4.586789536  | 6.309829049   | 0.143026935  |
| H280 | -0.064734594 | 6.399909063   | 6.918824632  |
| H281 | 2.748737159  | 7.754181024   | 6.032274652  |
| H282 | 3.075615437  | 9.526000797   | 8.328428267  |
| H283 | 1.033372136  | 5.607695305   | 8.071949981  |
| H284 | 1.009136837  | 9.709079792   | 5.597822649  |
| H285 | 9.090022227  | -5.487203746  | -1.335724209 |
| H286 | 7.950194293  | -6.667015553  | -2.010041821 |
| H287 | 5.048942095  | -9.212651725  | 0.913016273  |
| H288 | 10.185098472 | -7.197024146  | -2.701071356 |
| H289 | 9.402013848  | -6.639748701  | -4.027604338 |
| H290 | 3.448467274  | -0.071895164  | 6.974792936  |
| H291 | 2.354746161  | 2.081332555   | 8.891770346  |
| H292 | 6.497022718  | 2.612069189   | 7.660914412  |
| H293 | 2.652973331  | 1.456093020   | 6.505840211  |
| H294 | 3.537756107  | 1.861615078   | 9.996912030  |
| H295 | 8.344393221  | -1.201267157  | 3.288877864  |
| H296 | 5.069387232  | 1.105440951   | 8.362799536  |
| H297 | -5.051646746 | -8.191454767  | 1.141920052  |
| H298 | -2.852356637 | -10.321797031 | 1.173944953  |
| H299 | 7.630789565  | -1.525881510  | 1.021318004  |
| H300 | -2.347316526 | -2.676488713  | 4.330108276  |
| H301 | 7.700222016  | 0.905531914   | -1.510922913 |
| H302 | 3.469808605  | -0.033036362  | -2.832059058 |
| H303 | 6.263650066  | 1.010213626   | -0.465668913 |
| H304 | -3.884400434 | -5.782774966  | 1.337866511  |
| H305 | 6.144447145  | -1.486836511  | -0.568252950 |
| H306 | -2.301069661 | -6.320498446  | 0.767769439  |
| H307 | -3.588860835 | -8.274318207  | 0.134784943  |
| H308 | -2.239181097 | -8.144242991  | 2.392821691  |
| H309 | -3.767517807 | -7.629466820  | 3.132772229  |
| H310 | 5.440331046  | 2.572841589   | -6.444380029 |
| H311 | -5.678719942 | -10.416698071 | 0.177153281  |
| H312 | -5.003750068 | -11.703465621 | -2.520414116 |
| H313 | 3.349104914  | 1.578297922   | -0.972652101 |
| H314 | -7.166901188 | -12.300769755 | -0.652475763 |
| H315 | -7.220598096 | -11.549443683 | -2.107271719 |
| H316 | -1.248887858 | -5.455121210  | 2.652811987  |
| H317 | 4.209982348  | 3.912594745   | -1.288133017 |
| H318 | 4.587778893  | 0.594585755   | -4.975163935 |
| H319 | 0.501235417  | -12.354912873 | -1.084868956 |
| H320 | 3.049225788  | -10.315122586 | -1.132424990 |
| H321 | -0.627027739 | -10.303892444 | -0.334965045 |
| H322 | 1.212575351  | -12.434163506 | -2.453572250 |
| H323 | 10.662250845 | -1.556012134  | 1.349403308  |
| H324 | 0.463105306  | -7.900168446  | 1.458174324  |
| H325 | -2.181218638 | -6.826134440  | -2.295469326 |
| H326 | 7.452733319  | -3.909469999  | -1.206669989 |
| H327 | -0.916917199 | -8.599378932  | -3.646649530 |
| H328 | 5.743086242  | -7.592178866  | -4.191568509 |
| H329 | 4.220360874  | -5.771119439  | -3.273084203 |

|       |              |               |              |
|-------|--------------|---------------|--------------|
| H330  | -5.226756394 | -13.205238627 | -1.613916312 |
| H331  | -0.981298080 | -3.437554994  | 3.550083082  |
| H332  | -0.291864851 | -9.753462143  | 2.751671307  |
| H333  | 0.910449104  | -7.458491065  | 2.879337482  |
| H334  | -2.396595462 | -10.774721853 | 3.251587683  |
| H335  | -4.743516770 | -4.947850462  | 3.065695520  |
| H336  | 1.041592526  | -10.498422056 | -6.396346910 |
| H337  | 2.144148653  | -8.431570835  | -3.704182874 |
| H338  | 1.258562209  | -9.460601642  | -2.564224363 |
| H339  | 0.086562220  | -7.463293853  | -4.592210061 |
| H340  | 5.519502856  | -2.916551129  | -2.238950966 |
| H341  | 5.423178438  | 4.510212173   | -3.384256883 |
| H342  | 6.083179734  | 3.998447099   | -5.600735011 |
| H343  | -1.231747611 | -5.409958907  | -1.729380603 |
| H344  | -0.572828242 | -10.951715697 | 1.799672495  |
| H345  | -1.493982375 | -11.589241367 | -0.171257549 |
| H346  | -4.612425026 | -3.231651952  | 3.295431328  |
| H347  | 5.596279336  | -9.751715286  | -2.810390471 |
| H348  | 2.738376363  | -8.945972810  | -0.061896615 |
| H349  | 6.416373901  | -2.857945695  | -3.784486774 |
| H350  | 9.128590335  | 0.320910790   | 2.798371156  |
| H351  | -2.730985419 | -4.454235338  | 6.731310789  |
| H352  | -0.995792521 | -4.433469716  | 6.327634374  |
| H353  | 6.247692673  | -11.179064084 | 0.462300921  |
| H354  | 5.134399519  | -11.737532308 | -0.598029053 |
| H355  | 1.563403476  | -13.235782354 | 1.711856627  |
| H356  | 2.553504050  | -11.813032451 | 0.224783282  |
| H357  | 4.165871192  | -13.443531281 | 2.635094740  |
| H358  | 1.534493124  | -11.865829346 | 2.840495736  |
| H359  | -0.580942929 | -6.521385336  | 8.139835305  |
| H360  | -0.620579588 | 11.800186217  | 7.622750043  |
| H361  | -4.768486880 | -11.368615028 | 5.009286070  |
| H362  | -3.170966937 | -9.262185222  | 5.673226343  |
| H363  | 0.965998040  | 12.465440443  | 5.109285231  |
| H364  | -1.421837471 | 10.518662531  | 5.023444293  |
| H365  | -1.319726100 | 12.100047780  | 4.218716895  |
| H366  | 1.946184890  | 0.616653897   | 1.524908668  |
| H367  | 0.806121489  | -0.522652521  | -1.010228077 |
| H368  | 0.698129450  | -2.841943546  | -1.348302171 |
| H369  | 2.320595831  | 9.435393178   | -0.441785016 |
| Mo370 | 2.100367425  | -5.776665785  | -0.671710593 |
| N371  | -2.108660910 | -0.514394107  | -8.913275598 |
| N372  | -4.085846074 | 2.591921610   | -8.397609824 |
| N373  | -6.868405658 | 2.252885089   | -7.912254342 |
| N374  | -7.041722292 | -0.339657888  | -6.827471725 |
| N375  | -5.406407261 | 0.084347433   | -4.527352927 |
| N376  | -7.056292047 | 1.935805673   | -3.080656661 |
| N377  | -9.578162264 | 0.492645569   | -2.829797069 |
| N378  | -9.099001955 | -2.241280037  | -1.979837129 |
| N379  | -6.806573307 | -2.326673929  | -0.304026226 |
| N380  | -6.636293822 | -0.151679193  | 1.591631549  |
| N381  | -9.494266713 | 0.348186715   | 2.023731165  |
| N382  | -6.676369452 | -11.629181656 | -1.247134796 |
| N383  | -4.691689478 | -10.671061048 | 0.292196739  |
| N384  | -2.271462091 | -5.389166075  | 2.617792493  |
| N385  | -4.149604369 | -4.156459900  | 3.290149547  |
| N386  | -2.006210718 | -3.315627189  | 3.616741881  |
| N387  | -3.390619128 | -10.823993016 | 3.563105327  |
| N388  | 0.445288146  | 1.779665308   | -6.733338945 |
| N389  | 1.306266192  | -2.699290210  | -5.322603640 |
| N390  | 0.300796228  | 3.870468069   | -5.097178690 |
| N391  | -1.222569347 | 6.144357955   | -5.616002090 |
| N392  | -3.621163800 | 5.658158287   | -4.313051568 |
| N393  | -3.213211360 | 5.503851977   | -1.488088843 |
| N394  | 0.231953380  | 3.555986564   | -0.646820458 |
| N395  | -0.934907799 | 1.760545325   | -1.245306289 |
| N396  | -2.731578462 | 7.981883394   | -0.359116530 |
| N397  | -1.045619363 | 12.246079338  | -1.857633388 |
| N398  | -1.470282372 | 13.661519999  | -0.202218776 |
| N399  | -0.076575954 | -4.085394448  | 8.841413527  |
| N400  | 3.159141363  | 1.488056042   | 9.121301978  |
| N401  | 5.841230074  | 3.388986484   | 7.667862608  |
| N402  | 5.757030471  | 4.373334072   | 5.037742902  |
| N403  | 5.557480630  | 6.323958407   | 0.519961352  |
| N404  | 7.310285598  | 7.705035745   | 1.231837448  |
| N405  | 5.147969342  | 8.532336576   | 1.122032303  |
| N406  | 3.035296139  | 4.132828766   | 4.118243256  |
| N407  | 1.678115923  | 5.633264207   | 6.077687747  |
| N408  | 2.378301156  | 8.274994818   | 6.827842922  |
| N409  | 4.855752750  | 8.678690073   | 4.473258137  |

|      |               |               |              |
|------|---------------|---------------|--------------|
| N410 | 1.074056432   | 10.599359911  | 6.086657145  |
| N411 | 9.789964797   | -6.354006771  | -3.123864506 |
| N412 | 7.408727393   | -3.815415377  | -2.230818157 |
| N413 | 6.729605800   | -0.892799568  | -1.179192219 |
| N414 | 8.207401420   | -0.703582531  | 1.244116820  |
| N415 | 8.736844391   | -1.732764025  | -6.045307328 |
| N416 | 7.373744959   | 0.814959754   | -5.643559198 |
| N417 | 5.563829062   | -10.879123498 | -0.238309557 |
| N418 | 3.694038860   | -7.235595477  | -1.785025929 |
| N419 | 5.162523082   | -7.705831548  | -3.366154333 |
| N420 | 2.873755503   | -11.717413188 | 1.188005043  |
| N421 | -0.090925546  | -0.434399773  | 1.480842489  |
| N422 | -0.042231358  | -1.565504820  | 1.626112251  |
| O423 | -4.060742754  | 0.682291638   | -7.159000369 |
| O424 | -6.544047973  | 3.029221612   | -5.794526281 |
| O425 | -9.003757217  | 0.272551667   | -5.821854690 |
| O426 | -6.704194871  | -1.466916519  | -3.480375111 |
| O427 | -6.173818784  | 1.011261568   | -1.199619546 |
| O428 | -9.698929406  | 1.435068488   | -0.756174845 |
| O429 | -11.171946211 | -2.180526064  | -0.992358079 |
| O430 | -7.465033550  | -4.371733614  | 0.497596528  |
| O431 | -5.744925442  | -1.731894335  | 2.987761851  |
| O432 | -8.901725214  | 0.149574938   | 4.204101559  |
| O433 | -12.024808840 | -1.292913386  | 3.949387814  |
| O434 | -3.125248406  | -12.140100986 | -0.569117968 |
| O435 | -5.592614821  | -10.497278875 | 2.987372721  |
| O436 | -2.846885879  | -10.689097053 | 7.092647387  |
| O437 | -1.804225474  | 3.319829367   | -4.360416119 |
| O438 | 1.625586360   | -0.808751817  | -6.544552785 |
| O439 | -0.410948701  | 7.196642163   | -3.755980802 |
| O440 | 2.192954962   | 6.534678387   | -3.308640265 |
| O441 | -4.420681393  | 7.729536608   | -4.904581903 |
| O442 | -5.443282066  | 5.896786807   | -1.194759792 |
| O443 | -3.481974787  | 7.218406128   | 1.655147820  |
| O444 | -4.209697217  | 10.583564161  | 1.516211195  |
| O445 | -2.513365143  | -6.632958206  | 8.794206775  |
| O446 | -1.781349841  | 1.673879196   | 6.613089070  |
| O447 | 3.648214041   | 4.007472706   | 7.731459759  |
| O448 | 6.214053192   | 6.496505086   | 5.792169501  |
| O449 | 3.472136107   | 6.025708165   | 2.917752363  |
| O450 | -0.042694619  | 5.977135158   | 4.595614494  |
| O451 | 0.777727751   | 2.699773436   | 5.609708522  |
| O452 | 1.074793720   | 8.132568534   | 8.699404109  |
| O453 | 2.364022426   | 11.870506104  | 7.469059185  |
| O454 | 3.937721918   | 10.772566802  | 4.524524273  |
| O455 | -0.809382845  | 13.586165798  | 6.650150247  |
| O456 | 2.162724198   | 8.787364864   | 0.270840382  |
| O457 | 7.701861420   | -4.890785591  | -4.243332365 |
| O458 | 7.778835317   | -0.762996716  | -3.215107469 |
| O459 | 8.571572709   | 1.526554217   | 0.856001493  |
| O460 | 10.926423831  | -1.786478534  | 3.358952955  |
| O461 | 7.528745158   | 0.918700375   | -7.921105384 |
| O462 | 3.879812702   | -3.979537171  | -6.810485162 |
| O463 | 5.260417752   | -4.843358732  | -5.285717330 |
| O464 | 8.166645963   | 3.810015011   | -3.842926335 |
| O465 | 4.175397302   | -10.696215921 | 2.736382829  |
| O466 | 2.874101180   | -13.686745345 | 4.196509092  |
| O467 | -1.055281844  | -4.373582802  | -4.142803113 |
| O468 | -2.322840993  | -6.096694834  | -4.753556311 |
| O469 | 1.243555781   | -11.320502175 | -4.274772385 |
| O470 | 1.053551417   | -9.695820458  | -5.832791851 |
| O471 | 0.844871924   | -7.621113142  | -0.284342739 |
| O472 | -0.967983314  | -8.740727588  | -1.017822490 |
| O473 | 1.111517211   | -6.205355921  | -2.480522743 |
| O474 | -0.657612869  | -10.675247781 | 2.750017484  |
| O475 | 0.236880592   | -7.995280345  | 2.419887714  |
| O476 | 2.958025764   | 6.467197046   | -0.678485175 |
| O477 | 1.134959396   | -12.912915270 | -1.602565342 |
| O478 | -0.576715205  | -11.247385137 | -0.004668839 |
| S479 | 4.755513156   | 1.153091285   | 5.321399877  |
| S480 | 4.340301641   | -0.146510164  | 1.613026272  |
| S481 | 3.264680706   | -3.963388286  | -1.677172034 |
| S482 | 1.809479579   | -0.678763102  | 3.865137845  |
| S483 | 2.071614823   | -0.920359226  | -0.702480322 |
| S484 | 6.118141197   | -3.490048411  | 0.792990474  |
| S485 | 0.249969722   | -4.583468530  | 0.283587346  |
| S486 | 4.681527907   | -2.653683810  | 4.217887624  |
| S487 | 3.443634015   | -6.189426669  | 1.265613633  |
| S488 | 1.205389244   | -4.460454404  | 3.913911528  |

| 21 (S=1)       | bm12b2x6x6n22n6conexadtp.car_3 |               |              |               |
|----------------|--------------------------------|---------------|--------------|---------------|
| Fe(139) 2.581  | C1                             | -1.021646117  | -9.151401272 | -3.431157340  |
| Fe(140) -1.849 | C2                             | -2.209338325  | -8.190624160 | -3.320002211  |
| Fe(141) 2.461  | C3                             | -4.139486859  | -7.192890099 | -4.475269637  |
| Fe(142) -2.557 | C4                             | -5.229752420  | -7.400023879 | -3.426891449  |
| Fe(143) 2.923  | C5                             | -6.441328865  | -8.954177951 | -1.984141322  |
| Fe(144) -1.941 | C6                             | -6.065811480  | -8.383787273 | -0.610994997  |
| Fe(145) 0.105  | C7                             | -4.241047396  | -7.746730204 | 0.890870307   |
|                | C8                             | -4.332406751  | -6.219086303 | 0.838243419   |
|                | C9                             | -4.108003442  | -4.190325625 | -0.495200522  |
|                | C10                            | -5.539099200  | -3.674898867 | -0.286914527  |
|                | C11                            | -7.907104406  | -3.972554542 | -0.697327558  |
|                | C12                            | -8.479247022  | -4.177727684 | 0.712344228   |
|                | C13                            | -8.855870084  | -5.749951645 | 2.551638172   |
|                | C14                            | -8.177278693  | -5.283009208 | 3.844749218   |
|                | C15                            | -6.051645524  | -4.902665925 | 5.017503012   |
|                | C16                            | -5.274359295  | -3.584610424 | 5.022835354   |
|                | C17                            | -4.424026500  | -1.704559428 | 3.668562031   |
|                | C18                            | -5.303706783  | -0.451409263 | 3.536838698   |
|                | C19                            | -3.398778455  | -1.859782178 | 2.515297844   |
|                | C20                            | -2.712606411  | -0.540196167 | 2.147281358   |
|                | C21                            | -2.367300785  | -2.936025153 | 2.868068592   |
|                | C22                            | -7.169624688  | 0.626384919  | 2.319510927   |
|                | C23                            | -8.458338642  | 0.375986847  | 3.129189523   |
|                | C24                            | -7.450925212  | 0.871935134  | 0.817855521   |
|                | C25                            | -8.543614812  | 1.931708767  | 0.634801127   |
|                | C26                            | -6.172099159  | 1.286793882  | 0.080164350   |
|                | C27                            | -10.328779794 | -1.075270116 | 3.656928796   |
|                | C28                            | -10.197478131 | -0.889632383 | 5.155979554   |
|                | C29                            | 0.980489788   | -6.731677363 | 11.636087146  |
|                | C30                            | 1.447039781   | -5.344584661 | 11.188827498  |
|                | C31                            | 0.600184946   | -3.188076758 | 10.237308771  |
|                | C32                            | 0.017755131   | -2.258113680 | 11.321147858  |
|                | C33                            | -0.126729521  | -3.022495823 | 8.892110529   |
|                | C34                            | -0.029785770  | -1.615158682 | 8.297179122   |
|                | C35                            | -0.601258551  | -1.590488573 | 6.877750830   |
|                | C36                            | -1.520875181  | 0.450877977  | 5.740036441   |
|                | C37                            | 0.454042031   | -0.362449907 | 12.804898337  |
|                | C38                            | -0.067951404  | 0.965463498  | 12.292507165  |
|                | C39                            | 0.045293328   | -4.697151176 | -3.747753057  |
|                | C40                            | -0.749426449  | -3.632224252 | -4.513246522  |
|                | C41                            | 0.628460703   | -3.986503580 | -2.498882154  |
|                | C42                            | 1.065605568   | -4.870564012 | -1.310198437  |
|                | C43                            | 2.461689639   | -5.472420543 | -1.410959723  |
|                | C44                            | -0.552139212  | -1.850204811 | -6.218791224  |
|                | C45                            | -1.947221010  | -1.985196545 | -6.832381024  |
|                | C46                            | 0.506255526   | -1.450872036 | -7.280570725  |
|                | C47                            | -3.585825755  | -3.472685403 | -7.884334117  |
|                | C48                            | -4.745957213  | -3.410727803 | -6.881360756  |
|                | C49                            | -5.409602027  | -3.233042468 | -4.523023984  |
|                | C50                            | -5.478731125  | -1.830297265 | -3.906869706  |
|                | C51                            | -4.613605627  | 0.460271653  | -3.882449994  |
|                | C52                            | -5.753006331  | 1.119682939  | -4.673520583  |
|                | C53                            | -3.364200252  | 1.265623191  | -4.272063261  |
|                | C54                            | -2.130713190  | 1.097360960  | -3.450415157  |
|                | C55                            | -1.974779441  | 0.946695381  | -2.086608730  |
|                | C56                            | -0.005243253  | 1.217685127  | -3.047600313  |
|                | C57                            | -6.505973581  | 1.576214814  | -6.953507836  |
|                | C58                            | -7.969447417  | 1.600043693  | -6.516660105  |
|                | C59                            | -6.362944464  | 0.889662729  | -8.330564794  |
|                | C60                            | -6.756195586  | 1.697366304  | -9.532447726  |
|                | C61                            | -7.716625386  | 2.675872758  | -9.693075735  |
|                | C62                            | -6.657800350  | 2.312953525  | -11.604833440 |
|                | C63                            | -1.107981796  | 5.476584685  | 7.800346574   |
|                | C64                            | -0.415516274  | 5.037795555  | 9.076879731   |
|                | C65                            | -1.199085268  | 4.228869112  | 6.885698690   |
|                | C66                            | -1.904369995  | 4.516313193  | 5.581867089   |
|                | C67                            | -3.306415785  | 4.463547259  | 5.479274982   |
|                | C68                            | -1.169383962  | 4.838254506  | 4.426852174   |
|                | C69                            | -3.953447779  | 4.711887413  | 4.264296129   |
|                | C70                            | -1.801339550  | 5.093661996  | 3.208798705   |
|                | C71                            | -3.196363690  | 5.029566095  | 3.131406013   |
|                | C72                            | 0.975641394   | 8.780197411  | 0.634374008   |
|                | C73                            | 0.636233466   | 9.149634172  | -0.815483397  |
|                | C74                            | 0.867693817   | 7.261005870  | 0.827008586   |
|                | C75                            | 1.505546908   | 9.977839004  | -2.964020665  |
|                | C76                            | 1.405996095   | 8.813298879  | -3.950373114  |
|                | C77                            | 1.579218243   | 6.366285290  | -4.268027960  |
|                | C78                            | 0.166721759   | 5.763274413  | -4.103112249  |

|       |              |               |              |
|-------|--------------|---------------|--------------|
| C79   | 2.699000310  | 5.376689238   | -3.896614186 |
| C80   | 2.651358759  | 3.993479577   | -4.555785519 |
| C81   | 2.978896353  | 3.928101630   | -6.056762238 |
| C82   | 1.631372520  | 4.892388444   | -7.915341919 |
| C83   | -1.647420978 | 5.106195245   | -2.625019282 |
| C84   | -2.806557961 | 6.056086249   | -2.973702118 |
| C85   | -1.847238702 | 4.624025730   | -1.181103380 |
| C86   | -3.656404672 | 8.336190425   | -2.723074519 |
| C87   | -3.937824038 | 9.253414375   | -3.908396919 |
| C88   | -3.359905891 | 9.933983090   | -6.193492183 |
| C89   | -4.592978516 | 9.632941453   | -7.068734794 |
| C90   | -2.071500883 | 9.977647185   | -7.040710308 |
| C91   | -1.751536043 | 8.632717958   | -7.687299933 |
| C92   | -6.180320789 | 7.942748814   | -7.840942831 |
| C93   | -7.412346417 | 8.831273061   | -7.753629998 |
| C94   | -6.569446845 | 6.480504350   | -7.497757458 |
| C95   | -5.397936228 | 5.543564980   | -7.675996083 |
| C96   | -5.067449444 | 5.058593992   | -8.951431014 |
| C97   | -4.573548038 | 5.193775413   | -6.595015956 |
| C98   | -3.940646601 | 4.258867956   | -9.151086328 |
| C99   | -3.427983183 | 4.413068732   | -6.780587938 |
| C100  | -3.125964613 | 3.951317632   | -8.060322041 |
| C101  | 10.775572129 | -0.428472637  | 1.421003411  |
| C102  | 9.749875618  | -1.068154387  | 0.497122817  |
| C103  | 7.567857103  | -0.733687270  | -0.653260097 |
| C104  | 7.471489450  | 0.114476951   | -1.924071212 |
| C105  | 6.592258629  | 2.214475973   | -2.858834776 |
| C106  | 6.991616325  | 3.666567131   | -2.590107023 |
| C107  | 7.514489962  | 5.421447844   | -0.963392866 |
| C108  | 8.858837269  | 5.659911362   | -0.316691623 |
| C109  | 9.148090151  | -3.686384441  | -4.005620974 |
| C110  | 8.356370471  | -3.328219650  | -5.268168601 |
| C111  | 8.178808936  | -4.200525194  | -2.913917822 |
| C112  | 8.925810262  | -4.924207772  | -1.779708718 |
| C113  | 8.023850509  | -5.135248833  | -0.581078604 |
| C114  | 6.957331301  | -1.700655279  | -6.425915734 |
| C115  | 7.237176931  | -0.233457969  | -6.675286431 |
| C116  | 5.472114762  | -2.119655894  | -6.538238954 |
| C117  | 4.635102879  | -1.513974053  | -5.450427183 |
| C118  | 3.948358037  | -0.307503388  | -5.662026894 |
| C119  | 4.623824291  | -2.085919170  | -4.167081526 |
| C120  | 3.323750566  | 0.344122341   | -4.597135171 |
| C121  | 4.012506765  | -1.425231306  | -3.101592180 |
| C122  | 3.389732483  | -0.190855669  | -3.307699950 |
| C123  | 8.136662328  | -0.521994161  | 7.322632240  |
| C124  | 7.668956582  | -0.137527517  | 8.735059855  |
| C125  | 7.642177797  | -1.905324743  | 6.870470101  |
| C126  | 7.943878501  | -2.272387524  | 5.449711872  |
| C127  | 9.124526669  | -2.798412077  | 4.967067219  |
| C128  | 7.628043475  | -2.734397553  | 3.339115047  |
| C129  | 6.892682725  | -0.782066332  | 10.944542713 |
| C130  | 7.882128768  | 0.120034388   | 11.647880792 |
| C131  | 2.353745320  | -5.872002735  | 3.873889837  |
| C132  | 2.505054224  | -4.775122351  | 4.893451423  |
| C133  | 4.007484064  | -4.383597092  | 5.195891706  |
| C134  | 4.805327750  | -5.660387287  | 5.586707678  |
| C135  | 6.243670892  | -5.328326024  | 6.019658037  |
| C136  | 6.938369232  | -6.482789652  | 6.681319142  |
| C137  | 3.982470621  | -3.470299209  | 6.459342159  |
| C138  | 3.489033770  | 1.336911600   | 2.221864895  |
| Fe139 | 5.290390455  | 0.573489437   | 2.545428400  |
| Fe140 | 2.348489297  | 1.638641164   | 0.561736881  |
| Fe141 | 2.429319992  | 2.786603439   | 2.895087587  |
| Fe142 | 4.563342580  | 2.778626533   | 1.413127723  |
| Fe143 | 2.516061702  | 4.307880508   | 0.615238410  |
| Fe144 | 3.297024443  | 0.744224411   | 4.103485918  |
| Fe145 | 2.791572585  | -1.314917665  | 2.179260737  |
| H146  | -0.251877681 | -8.747665961  | -1.587111278 |
| H147  | 0.579222908  | -8.034634138  | -2.805273223 |
| H148  | -2.746850635 | -8.606896071  | -5.259697029 |
| H149  | -0.664401793 | -9.174185583  | -4.471912585 |
| H150  | -1.425001897 | -10.159488008 | -3.226588056 |
| H151  | -3.783069756 | -6.160499571  | -4.353178058 |
| H152  | -4.900846685 | -9.428735687  | -3.415548706 |
| H153  | -4.596040675 | -7.277994796  | -5.471027153 |
| H154  | -6.555752189 | -10.043147610 | -1.901130575 |
| H155  | -4.073767908 | -8.607650441  | -1.050748410 |
| H156  | -7.413479156 | -8.522262465  | -2.256199318 |
| H157  | -3.468876632 | -3.666970183  | 0.226865724  |
| H158  | -3.588543013 | -6.193889234  | -1.091036050 |

|      |               |              |               |
|------|---------------|--------------|---------------|
| H159 | -3.193716388  | -8.045353629 | 1.039053307   |
| H160 | -7.990082468  | -2.903356300 | -0.929748633  |
| H161 | -6.304937228  | -5.202319255 | -1.452136848  |
| H162 | -4.823111214  | -8.071577199 | 1.761498803   |
| H163 | -3.761455986  | -3.926746075 | -1.504201884  |
| H164 | -7.694615973  | -6.093046300 | 0.786959033   |
| H165 | -8.527538509  | -4.533404339 | -1.410104946  |
| H166 | -2.845877689  | -3.888866936 | 3.134046686   |
| H167 | -1.694459468  | -3.115738815 | 2.017709681   |
| H168 | -1.738621849  | -2.611119530 | 3.712236585   |
| H169 | -3.975043844  | -2.188523322 | 1.637257847   |
| H170 | -8.917771490  | -6.847127925 | 2.590308092   |
| H171 | -5.393231125  | 0.513959922  | 0.140173528   |
| H172 | -8.765385972  | -1.518586880 | 2.284252152   |
| H173 | -9.497203471  | 1.631239459  | 1.093797121   |
| H174 | -2.024540595  | -0.710003477 | 1.306916538   |
| H175 | -2.108177425  | -0.141326500 | 2.973702215   |
| H176 | -2.140606380  | 5.774675532  | 8.068234876   |
| H177 | -6.399009545  | 1.460830957  | -0.981748922  |
| H178 | -8.721771306  | 2.105781275  | -0.436076508  |
| H179 | -5.768531367  | 2.222131795  | 0.502003183   |
| H180 | -8.234863774  | 2.887186370  | 1.088393259   |
| H181 | -7.810199478  | -0.075877976 | 0.376769691   |
| H182 | -6.734626116  | 1.535382419  | 2.759068732   |
| H183 | -6.183131678  | -1.223722518 | 1.846041687   |
| H184 | -3.429836337  | 0.236152707  | 1.840931133   |
| H185 | -0.978618001  | 4.012744137  | -0.877265503  |
| H186 | -2.743857421  | 3.984636872  | -1.171985246  |
| H187 | -2.662229967  | 5.503692078  | 0.380858955   |
| H188 | -4.748105426  | 5.193813861  | 1.973319073   |
| H189 | -1.212097406  | 5.306882077  | 2.316297062   |
| H190 | -0.077065180  | 4.842241579  | 4.464715462   |
| H191 | -3.906227514  | 4.203572442  | 6.355434035   |
| H192 | -5.635680414  | -3.347674602 | 3.021909576   |
| H193 | -5.317475808  | -5.702752211 | 5.203599543   |
| H194 | -6.743258911  | -4.878814228 | 5.869786835   |
| H195 | -6.298622603  | -5.517724342 | 2.994210157   |
| H196 | -9.875595828  | -5.346422091 | 2.575838288   |
| H197 | -5.042663277  | 4.647394907  | 4.197421906   |
| H198 | -3.884206189  | -1.574457893 | 4.614163314   |
| H199 | -11.155942312 | -0.444840336 | 3.292416209   |
| H200 | -10.600171379 | -2.128114865 | 3.479865599   |
| H201 | -9.174752191  | -1.064573784 | 5.565018740   |
| H202 | 1.292741935   | -0.180332275 | 13.493102201  |
| H203 | 4.153953813   | -5.792143984 | -0.311169824  |
| H204 | 2.169834459   | -7.106259452 | 5.347836099   |
| H205 | 9.264981889   | -5.907281997 | -2.135436365  |
| H206 | 9.809125649   | -4.340342418 | -1.483382720  |
| H207 | 7.442643386   | -4.890862029 | -3.355847689  |
| H208 | 8.163897099   | 0.149267311  | -6.183968882  |
| H209 | 9.786650412   | -4.525231530 | -4.320043930  |
| H210 | 1.468126832   | -3.351084489 | -2.825899497  |
| H211 | 0.355932732   | -5.706861504 | -1.184344866  |
| H212 | 7.693295455   | -1.549086672 | -4.413336321  |
| H213 | 7.477449181   | -2.208080151 | -7.265251148  |
| H214 | 9.497248110   | -1.820902806 | -3.178181089  |
| H215 | 2.896870458   | -4.975247372 | 0.571922292   |
| H216 | 7.611290092   | -3.342978944 | -2.519025350  |
| H217 | 10.701059989  | -2.904198715 | -2.913822747  |
| H218 | 0.739271594   | -6.028622056 | -5.162455313  |
| H219 | -0.152521550  | -3.310824048 | -2.120472214  |
| H220 | 8.771132052   | -3.480936812 | 0.168185153   |
| H221 | 0.993929512   | -4.269473163 | -0.392292148  |
| H222 | -4.855922131  | 0.570396897  | -2.818006238  |
| H223 | -2.688009704  | 0.812936013  | -1.279466676  |
| H224 | -6.400391382  | -3.426726925 | -4.955145717  |
| H225 | -3.430346329  | -3.450396867 | -5.271821535  |
| H226 | -5.063352243  | 0.130452138  | -6.340941746  |
| H227 | -8.414842325  | 3.130054235  | -8.999268661  |
| H228 | -8.304666495  | 0.647870020  | -6.040015699  |
| H229 | -6.909149906  | -0.070453676 | -8.310310546  |
| H230 | -6.132005708  | 2.612086442  | -7.004405046  |
| H231 | -6.390435957  | 2.418759709  | -12.653433520 |
| H232 | -3.659641626  | 2.328841396  | -4.243178891  |
| H233 | -3.107922951  | 1.042709110  | -5.318824644  |
| H234 | -8.201791594  | 3.7743331691 | -11.464332700 |
| H235 | -5.300079268  | 0.629507666  | -8.459630372  |
| H236 | -3.751183860  | -1.226561421 | -4.877140670  |
| H237 | -5.265222026  | -3.960514196 | -3.711351528  |
| H238 | -3.829070606  | -2.750920942 | -8.676462954  |

|      |              |              |               |
|------|--------------|--------------|---------------|
| H239 | 1.069473090  | 1.312617592  | -3.131453711  |
| H240 | -3.578143558 | -4.471967461 | -8.339542276  |
| H241 | -0.101561028 | 1.071742517  | -0.965964119  |
| H242 | -0.472054347 | 7.419073073  | 7.653767450   |
| H243 | -0.645200391 | 6.676714797  | 6.207362596   |
| H244 | 0.284159411  | 5.886704678  | -2.021680831  |
| H245 | -1.752505248 | 4.237674703  | -3.292008186  |
| H246 | -1.682640043 | 7.668161881  | -2.388396747  |
| H247 | -0.471738375 | 1.746375340  | -5.719090312  |
| H248 | 0.059830258  | 0.471966789  | -7.480960664  |
| H249 | -1.029770670 | 2.345746347  | -7.082924706  |
| H250 | 1.461360772  | -1.288840659 | -6.746316593  |
| H251 | 0.648713448  | -2.296093789 | -7.973815657  |
| H252 | -1.245336969 | 10.332596077 | -6.406777415  |
| H253 | -2.231349378 | 10.708492446 | -7.845829595  |
| H254 | -0.127228193 | 8.328230017  | -6.383891701  |
| H255 | -0.529931636 | 7.006679294  | -7.469323947  |
| H256 | 2.456205117  | 6.347843699  | -9.093582088  |
| H257 | 3.476289768  | 2.974832381  | -6.291318721  |
| H258 | -3.705044230 | 3.873391476  | -10.146060862 |
| H259 | -4.811909930 | 5.521599168  | -5.580375952  |
| H260 | -0.346058641 | 4.412262618  | -8.228886348  |
| H261 | 2.681934592  | 5.216893357  | -2.807021916  |
| H262 | 1.957919679  | 7.476759833  | -2.484605427  |
| H263 | 1.678052678  | 3.512670235  | -4.369454326  |
| H264 | -1.591547201 | -3.956982703 | -7.252528244  |
| H265 | 2.350488116  | 10.608386044 | -3.272918082  |
| H266 | 0.846554027  | -3.449161217 | -5.708426402  |
| H267 | 3.663720749  | 5.858317080  | -4.126440527  |
| H268 | -2.762963801 | 4.199214949  | -5.943375211  |
| H269 | -1.979243156 | 2.761501904  | -9.096563223  |
| H270 | 0.583361313  | 10.562248581 | -3.089014200  |
| H271 | 3.599841583  | 5.444185700  | -8.167217367  |
| H272 | 0.391893621  | 5.351631677  | -9.464260963  |
| H273 | 1.838193941  | -5.657806858 | -3.967103394  |
| H274 | -0.707093335 | -5.432032384 | -3.400677218  |
| H275 | -5.697141316 | 5.309058671  | -9.808319996  |
| H276 | -0.641947361 | -1.037149052 | -5.479550943  |
| H277 | 1.650006259  | 6.646929148  | -5.327054307  |
| H278 | 3.689546308  | 4.726162097  | -6.307287079  |
| H279 | 3.399136041  | 3.380325534  | -4.031384783  |
| H280 | 1.020138131  | 3.354590818  | -6.739281747  |
| H281 | -4.585139777 | 7.775573766  | -2.537840932  |
| H282 | -2.464398126 | 8.350668540  | -5.011011874  |
| H283 | -3.539035083 | 10.944727424 | -5.797359414  |
| H284 | -3.475690827 | 8.986516024  | -1.856246793  |
| H285 | -4.650850608 | 7.719289719  | -6.366990781  |
| H286 | 10.760517694 | 0.664449029  | 1.297400113   |
| H287 | 10.426269439 | -0.639991971 | 2.452532935   |
| H288 | 7.709545351  | 0.240184342  | 6.653242299   |
| H289 | 12.739903060 | -0.695464726 | 1.896769875   |
| H290 | 12.072106024 | -1.963619376 | 1.100421738   |
| H291 | 1.172012830  | 7.018396482  | 1.853145073   |
| H292 | -0.885033624 | 9.255749569  | 1.318566655   |
| H293 | 2.599536963  | 9.660536527  | -1.156576394  |
| H294 | -0.172937272 | 6.944643868  | 0.667250174   |
| H295 | 0.199885395  | 10.460896413 | 1.521691357   |
| H296 | 6.715520899  | 5.799271718  | -0.305373237  |
| H297 | 2.009111493  | 9.090002875  | 0.856412815   |
| H298 | -1.184590543 | -3.303614517 | 9.032147985   |
| H299 | 1.669901822  | -2.987510253 | 10.103278892  |
| H300 | 7.105939173  | 3.378303147  | -0.538340456  |
| H301 | -1.899647548 | 2.175359989  | 4.734667381   |
| H302 | 7.183062888  | 1.867652627  | -3.716590548  |
| H303 | 4.035534686  | -1.848733553 | -2.095527921  |
| H304 | 5.534773441  | 2.234741005  | -3.167076831  |
| H305 | -1.649962249 | -1.918683652 | 6.874098794   |
| H306 | 6.318296193  | 1.433901416  | -0.870688212  |
| H307 | -0.045451940 | -2.301112279 | 6.243701114   |
| H308 | 0.319216000  | -3.752344674 | 8.197550768   |
| H309 | 1.021131017  | -1.287186296 | 8.257764882   |
| H310 | -0.576043787 | -0.889148134 | 8.921596193   |
| H311 | 5.443653057  | -3.218392028 | -6.503406452  |
| H312 | -0.472392104 | -4.976358825 | 10.774290113  |
| H313 | 1.323969688  | -7.433049709 | 10.859593136  |
| H314 | 2.975407641  | 0.346679039  | -2.453903928  |
| H315 | -0.770133087 | -6.576581335 | 12.708924346  |
| H316 | -0.771750396 | -7.809493043 | 11.628633787  |
| H317 | 0.431540332  | 0.034097178  | 5.967693336   |
| H318 | 2.805101700  | 1.286896921  | -4.772076855  |

|       |              |              |               |
|-------|--------------|--------------|---------------|
| H319  | 5.117968184  | -3.046393420 | -4.001708105  |
| H320  | 6.114443327  | -4.225212018 | 10.150802328  |
| H321  | 8.111271174  | -2.671779319 | 7.512794898   |
| H322  | 4.148324578  | -3.459989881 | 9.025073004   |
| H323  | 7.090528382  | -5.203995088 | 9.449639812   |
| H324  | 9.627610883  | 4.874241863  | -0.511878462  |
| H325  | 3.696472705  | -0.929472840 | 7.280519265   |
| H326  | 2.020901382  | -5.053980121 | 5.841058456   |
| H327  | 8.563487233  | 0.604371440  | 0.633636562   |
| H328  | 4.276103159  | -6.163160965 | 6.411687427   |
| H329  | 9.562193814  | -3.506367589 | 2.991470329   |
| H330  | 7.174865114  | -2.895186529 | 2.368390057   |
| H331  | 1.545042086  | -6.973181482 | 12.552466348  |
| H332  | -0.245805312 | 1.635197767  | 4.654895232   |
| H333  | 3.321577232  | -0.474208943 | 9.611942246   |
| H334  | 3.266846827  | 0.560445616  | 7.186069416   |
| H335  | 1.783924437  | -1.148134425 | 11.301797610  |
| H336  | -3.011116526 | -0.454324849 | 6.817184493   |
| H337  | 7.554989958  | -8.243898399 | 6.364294446   |
| H338  | 6.818026109  | -5.007512687 | 5.138399198   |
| H339  | 6.249253003  | -4.505137672 | 6.741358435   |
| H340  | 4.833799310  | -6.340242077 | 4.722286831   |
| H341  | 6.646694521  | -0.664255244 | -0.056737760  |
| H342  | 3.934355107  | 0.132640747  | -6.661776620  |
| H343  | 5.113409682  | -1.806346262 | -7.528818606  |
| H344  | 2.027928225  | -3.871129655 | 4.492822243   |
| H345  | 3.840825385  | -1.710833876 | 10.392750318  |
| H346  | 3.826256298  | -3.931396463 | 10.471529586  |
| H347  | -3.585031648 | 0.512009445  | 5.496611164   |
| H348  | 10.072058569 | -2.995665173 | 5.455254746   |
| H349  | 6.555606897  | -1.961531901 | 7.019285661   |
| H350  | 7.728579741  | -1.775289123 | -0.942885071  |
| H351  | 7.485285885  | 6.005128273  | -1.899256713  |
| H352  | -1.737055021 | 3.446147734  | 7.442444302   |
| H353  | -0.181286083 | 3.857387652  | 6.683737393   |
| H354  | 9.889305991  | 0.520540249  | 7.494448159   |
| H355  | 10.024140851 | -1.050316799 | 7.932452691   |
| H356  | 6.831327661  | -1.715353698 | 11.525957046  |
| H357  | 7.301442216  | -2.106702809 | 9.323824076   |
| H358  | 8.940980979  | 0.007342407  | 11.311627905  |
| H359  | 5.893996098  | -0.317723583 | 10.949458816  |
| H360  | 0.698618895  | 4.999155801  | 9.005536770   |
| H361  | -7.565995329 | 9.328415965  | -6.767595239  |
| H362  | -0.361548003 | -0.830519742 | 13.381565118  |
| H363  | -0.376039049 | 0.973318327  | 11.218464937  |
| H364  | -5.815966481 | 7.980836667  | -8.881192855  |
| H365  | -6.943745498 | 6.438847333  | -6.462669980  |
| H366  | -7.398092076 | 6.193375480  | -8.162440517  |
| H367  | 1.482825323  | 1.515658337  | -0.699305719  |
| H368  | 1.638275489  | -0.994861843 | -0.496046921  |
| H369  | 2.914478962  | -2.797798071 | 2.097662621   |
| Mo370 | 4.699050030  | -1.629037990 | 4.162804608   |
| N371  | 0.098108546  | -8.897559507 | -2.537420921  |
| N372  | -3.034670566 | -8.139864719 | -4.403249711  |
| N373  | -5.454073059 | -8.673813186 | -3.016237330  |
| N374  | -4.741507493 | -8.394966575 | -0.310993600  |
| N375  | -3.989152297 | -5.633487015 | -0.334941786  |
| N376  | -6.529580692 | -4.411785945 | -0.843033581  |
| N377  | -8.217692275 | -5.377108933 | 1.297414611   |
| N378  | -6.817216669 | -5.201374022 | 3.820177826   |
| N379  | -5.223315670 | -2.910223807 | 3.843615161   |
| N380  | -6.203037388 | -0.454159537 | 2.520298317   |
| N381  | -9.082641913 | -0.818561734 | 2.957599507   |
| N382  | -0.476877104 | -6.841587629 | 11.766083999  |
| N383  | 0.464463137  | -4.565968461 | 10.697098391  |
| N384  | -0.507342348 | -0.272491511 | 6.244352444   |
| N385  | -2.801082767 | 0.247570457  | 6.114742490   |
| N386  | -1.245999358 | 1.399595719  | 4.828033997   |
| N387  | 0.850380046  | -1.277496806 | 11.750712466  |
| N388  | 1.106125455  | -5.267949331 | -4.583900415  |
| N389  | 3.233973647  | -5.356313446 | -0.311323277  |
| N390  | -0.098304986 | -3.072492260 | -5.559809050  |
| N391  | -2.266041188 | -3.201235254 | -7.344315681  |
| N392  | -4.416842361 | -3.435778856 | -5.560407915  |
| N393  | -4.480004386 | -0.954926376 | -4.216268282  |
| N394  | -0.887319846 | 1.261512395  | -4.044271440  |
| N395  | -0.619168036 | 1.022540842  | -1.858498232  |
| N396  | -5.755348315 | 0.791167541  | -5.992715856  |
| N397  | -6.102453351 | 1.479020363  | -10.735227242 |
| N398  | -7.636653294 | 3.057674006  | -11.016609374 |



|      |               |              |              |
|------|---------------|--------------|--------------|
| N399 | -0.317747398  | 6.533456142  | 7.166713397  |
| N400 | 0.083468546   | 9.446295218  | 1.595559425  |
| N401 | 1.671389631   | 9.618908018  | -1.569561649 |
| N402 | 1.745166796   | 7.591922394  | -3.487708168 |
| N403 | 1.791832329   | 4.034151640  | -6.915272785 |
| N404 | 2.631990578   | 5.695337250  | -8.336414134 |
| N405 | 0.412205250   | 5.046741054  | -8.493899592 |
| N406 | -0.325653026  | 5.684969020  | -2.837453580 |
| N407 | -2.554977241  | 7.394153950  | -2.851021530 |
| N408 | -3.219822507  | 9.035444234  | -5.049052177 |
| N409 | -0.713316208  | 7.954284006  | -7.141010924 |
| N410 | -5.150933637  | 8.406297321  | -6.926687226 |
| N411 | 12.117373199  | -0.940521932 | 1.123290148  |
| N412 | 8.695394297   | -0.299084278 | 0.163234524  |
| N413 | 6.769528308   | 1.258825067  | -1.782288003 |
| N414 | 7.289250271   | 4.029382389  | -1.313778054 |
| N415 | 10.033562503  | -2.579188514 | -3.616673803 |
| N416 | 7.651509320   | -2.160963842 | -5.236170088 |
| N417 | 9.606158717   | -0.427994265 | 7.232505191  |
| N418 | 7.017518620   | -2.230352735 | 4.410760916  |
| N419 | 8.903262049   | -3.082404545 | 3.637863624  |
| N420 | 7.333241137   | -1.128562931 | 9.603740619  |
| N421 | 0.866288395   | -2.129607671 | 1.749628138  |
| N422 | 0.671153928   | -1.049176210 | 2.079658553  |
| O423 | -2.446347201  | -7.540821803 | -2.284214162 |
| O424 | -5.881661176  | -6.436009674 | -2.994166341 |
| O425 | -6.937807806  | -7.971386081 | 0.170180547  |
| O426 | -4.716699312  | -5.561300604 | 1.819622137  |
| O427 | -5.766544529  | -2.636055579 | 0.355266261  |
| O428 | -9.177712625  | -3.305835274 | 1.257289398  |
| O429 | -8.864751653  | -5.055421613 | 4.849070137  |
| O430 | -4.713445112  | -3.207482189 | 6.062992525  |
| O431 | -5.169588489  | 0.503817252  | 4.328554504  |
| O432 | -8.912433897  | 1.237539143  | 3.900238965  |
| O433 | -11.143555052 | -0.630852169 | 5.884088787  |
| O434 | 2.654824186   | -5.037908842 | 11.273876039 |
| O435 | -1.130552676  | -2.441254585 | 11.762960319 |
| O436 | -0.162916276  | 1.961823752  | 12.990387430 |
| O437 | -1.897367504  | -3.293315185 | -4.159315371 |
| O438 | 2.869584491   | -6.046986246 | -2.444916353 |
| O439 | -2.740796808  | -1.028090318 | -6.845619542 |
| O440 | 0.136014602   | -0.333394741 | -8.062287076 |
| O441 | -5.909551076  | -3.362810763 | -7.306564200 |
| O442 | -6.424778916  | -1.533931801 | -3.166821922 |
| O443 | -6.519457651  | 1.961250577  | -4.191980042 |
| O444 | -8.742724823  | 2.523842885  | -6.713264611 |
| O445 | -1.000786194  | 4.721825528  | 10.103519641 |
| O446 | -3.779378193  | 5.272981693  | 1.902812386  |
| O447 | -0.514747169  | 9.041497457  | -1.276345199 |
| O448 | 1.044371160   | 9.051337581  | -5.121505659 |
| O449 | -0.469815133  | 5.381824793  | -5.098784762 |
| O450 | -3.911952856  | 5.594954113  | -3.289131313 |
| O451 | -2.007798353  | 5.743516040  | -0.305721910 |
| O452 | -4.804927189  | 10.132612045 | -3.823327066 |
| O453 | -5.045301773  | 10.492437178 | -7.838647236 |
| O454 | -2.431561258  | 8.191694386  | -8.629232294 |
| O455 | -8.212754832  | 8.952358054  | -8.668277499 |
| O456 | -1.954582472  | 3.201289304  | -8.224629617 |
| O457 | 9.900313629   | -2.257036408 | 0.117000981  |
| O458 | 8.029271055   | -0.233703551 | -2.988220378 |
| O459 | 7.011054133   | 4.455806116  | -3.548812458 |
| O460 | 9.110724980   | 6.645394515  | 0.359440648  |
| O461 | 8.344173987   | -4.082829059 | -6.255734624 |
| O462 | 7.240724140   | -6.070045804 | -0.470288328 |
| O463 | 8.088476986   | -4.189101397 | 0.383553839  |
| O464 | 6.564000156   | 0.483635579  | -7.400154166 |
| O465 | 7.673547405   | 1.051569664  | 9.106720246  |
| O466 | 7.581968225   | 0.857043817  | 12.577126651 |
| O467 | 2.374400078   | -5.739472146 | 2.660857171  |
| O468 | 2.185226843   | -7.143534483 | 4.372644658  |
| O469 | 7.317280513   | -6.519538616 | 7.849999925  |
| O470 | 7.115606536   | -7.538431554 | 5.843518384  |
| O471 | 4.514498223   | -2.297202068 | 6.316429161  |
| O472 | 3.515875533   | -3.908311942 | 7.536399499  |
| O473 | 4.586738557   | -3.738942401 | 4.125882129  |
| O474 | 3.385944135   | -0.837341030 | 10.531504000 |
| O475 | 3.212555891   | -0.220123229 | 7.770928146  |
| O476 | -0.210397498  | 1.998709518  | -6.666258259 |
| O477 | 7.023373855   | -4.610576540 | 10.226377774 |
| O478 | 4.456716032   | -3.350338642 | 9.973340891  |

|                 |                                    |               |               |              |
|-----------------|------------------------------------|---------------|---------------|--------------|
|                 | S479                               | 1.937723219   | 6.313780443   | -0.346906278 |
|                 | S480                               | 3.709522126   | 2.993302295   | -0.700305091 |
|                 | S481                               | 5.010257757   | -1.587366765  | 1.843875340  |
|                 | S482                               | 0.763688346   | 2.976482647   | 1.361563793  |
|                 | S483                               | 2.819114836   | -0.549451342  | 0.014236566  |
|                 | S484                               | 6.667431201   | 2.017032451   | 1.516161688  |
|                 | S485                               | 2.397649815   | -1.275962608  | 4.373703177  |
|                 | S486                               | 3.809120900   | 4.583808261   | 2.496210557  |
|                 | S487                               | 5.424949376   | 0.577278111   | 4.796793843  |
|                 | S488                               | 1.923967363   | 2.245831729   | 4.994885378  |
| <b>22 (S=0)</b> | <b>bm12b2x6x26nnxtconexa.car_3</b> |               |               |              |
| Fe(139) 2.324   | C1                                 | -7.362076844  | -5.308471437  | -3.650838226 |
| Fe(140) 0.097   | C2                                 | -7.502964849  | -4.560452440  | -2.319726919 |
| Fe(141) 1.385   | C3                                 | -8.887553446  | -3.034782073  | -0.972583525 |
| Fe(142) -2.622  | C4                                 | -8.861161839  | -3.768480332  | 0.365792319  |
| Fe(143) 1.950   | C5                                 | -9.288282186  | -5.831111812  | 1.603059896  |
| Fe(144) -2.320  | C6                                 | -7.873571467  | -6.191610194  | 2.073899738  |
| Fe(145) -0.818  | C7                                 | -5.544545954  | -6.570662839  | 1.420932265  |
|                 | C8                                 | -4.869229205  | -5.320860575  | 1.997121694  |
|                 | C9                                 | -4.757495622  | -2.882121772  | 2.025505248  |
|                 | C10                                | -5.274883366  | -2.636791545  | 3.450204418  |
|                 | C11                                | -7.109781651  | -2.712775213  | 5.022519566  |
|                 | C12                                | -6.475043919  | -3.636628124  | 6.069494069  |
|                 | C13                                | -5.830965995  | -5.917399753  | 6.657918980  |
|                 | C14                                | -4.310250072  | -5.966050664  | 6.874872766  |
|                 | C15                                | -2.096874304  | -5.962694033  | 5.792846282  |
|                 | C16                                | -1.216662942  | -4.716995900  | 5.664661640  |
|                 | C17                                | -1.175944198  | -2.270648680  | 5.292543057  |
|                 | C18                                | -1.518570976  | -1.309222613  | 6.442831369  |
|                 | C19                                | -1.376662033  | -1.666360716  | 3.882722380  |
|                 | C20                                | -0.688593847  | -0.299678954  | 3.777543962  |
|                 | C21                                | -0.886399771  | -2.643461441  | 2.808422497  |
|                 | C22                                | -3.196478816  | 0.117193581   | 7.513992571  |
|                 | C23                                | -3.380262446  | -0.625797676  | 8.850555618  |
|                 | C24                                | -4.426488701  | 0.942201006   | 7.065786221  |
|                 | C25                                | -4.980044912  | 1.797137905   | 8.212262238  |
|                 | C26                                | -4.049211766  | 1.811245350   | 5.860701957  |
|                 | C27                                | -4.158305093  | -2.635530130  | 9.970943354  |
|                 | C28                                | -2.845340780  | -2.962702060  | 10.653124121 |
|                 | C29                                | 4.212447150   | -12.428213229 | 2.893565296  |
|                 | C30                                | 4.991280860   | -11.119710595 | 2.791119991  |
|                 | C31                                | 5.115960376   | -8.828671456  | 3.795743943  |
|                 | C32                                | 5.929154929   | -8.648856670  | 5.091280354  |
|                 | C33                                | 3.887896351   | -7.904290059  | 3.745886803  |
|                 | C34                                | 4.224681278   | -6.414742195  | 3.703160494  |
|                 | C35                                | 2.969674565   | -5.578375955  | 3.426020807  |
|                 | C36                                | 3.348602512   | -3.243344405  | 4.234278731  |
|                 | C37                                | 8.081738801   | -7.958810362  | 6.043157079  |
|                 | C38                                | 8.381091432   | -6.504950586  | 6.336729187  |
|                 | C39                                | -4.664250763  | -1.662371942  | -3.337214184 |
|                 | C40                                | -5.025551596  | -0.286269698  | -2.755962551 |
|                 | C41                                | -3.190437455  | -1.949899655  | -2.968023278 |
|                 | C42                                | -2.735254885  | -3.424479839  | -3.030405118 |
|                 | C43                                | -2.280927686  | -3.920611416  | -4.399495500 |
|                 | C44                                | -5.140519849  | 2.130251270   | -3.284256903 |
|                 | C45                                | -6.403971881  | 2.472695508   | -2.491185193 |
|                 | C46                                | -5.021638139  | 2.991260052   | -4.569142902 |
|                 | C47                                | -8.756225326  | 1.931833089   | -2.051867846 |
|                 | C48                                | -8.700064753  | 1.506259083   | -0.578572642 |
|                 | C49                                | -7.362792580  | 0.467540252   | 1.198205419  |
|                 | C50                                | -6.317937096  | 1.348591559   | 1.899126556  |
|                 | C51                                | -4.759669651  | 3.238248494   | 1.748824748  |
|                 | C52                                | -5.614868015  | 4.342757629   | 2.392561029  |
|                 | C53                                | -3.861778328  | 3.965259570   | 0.728980076  |
|                 | C54                                | -2.752641042  | 3.193003603   | 0.089738540  |
|                 | C55                                | -1.837007399  | 2.320980013   | 0.640070452  |
|                 | C56                                | -1.347200076  | 2.667015329   | -1.482902372 |
|                 | C57                                | -7.357602172  | 5.993507018   | 1.927394834  |
|                 | C58                                | -7.929919571  | 5.863153467   | 3.337902702  |
|                 | C59                                | -8.495730249  | 6.154030395   | 0.894342898  |
|                 | C60                                | -9.113902811  | 7.517296665   | 0.781674093  |
|                 | C61                                | -9.211468073  | 8.543721305   | 1.699970435  |
|                 | C62                                | -10.165312412 | 9.124756452   | -0.214498717 |
|                 | C63                                | 7.349118270   | 0.475543794   | 6.436509954  |
|                 | C64                                | 8.466415091   | -0.550860395  | 6.449719957  |
|                 | C65                                | 6.150937175   | -0.174996256  | 5.699679727  |
|                 | C66                                | 4.917389043   | 0.694919022   | 5.708050717  |
|                 | C67                                | 3.930271986   | 0.572688707   | 6.702430769  |
|                 | C68                                | 4.729244256   | 1.669824610   | 4.714363739  |

|       |              |              |               |
|-------|--------------|--------------|---------------|
| C69   | 2.791860522  | 1.387270923  | 6.702675085   |
| C70   | 3.613429661  | 2.504062842  | 4.714803685   |
| C71   | 2.639983536  | 2.358726709  | 5.705602007   |
| C72   | 5.447590547  | 6.716910107  | 2.054503100   |
| C73   | 4.591565889  | 7.870190869  | 1.516316265   |
| C74   | 4.750207471  | 5.374895084  | 1.788280041   |
| C75   | 4.303563787  | 9.537220722  | -0.265336916  |
| C76   | 3.002932144  | 9.133049684  | -0.962999914  |
| C77   | 1.603314716  | 7.284180656  | -1.808113221  |
| C78   | 0.584615001  | 6.923922408  | -0.704159192  |
| C79   | 1.924369164  | 6.088330697  | -2.723228731  |
| C80   | 0.732335390  | 5.403580204  | -3.402182335  |
| C81   | 0.007250741  | 6.198650947  | -4.501429860  |
| C82   | -1.283534270 | 8.305799501  | -4.133689087  |
| C83   | 0.112886216  | 5.800991392  | 1.400207811   |
| C84   | -0.290860021 | 6.902569951  | 2.397489852   |
| C85   | 0.602274308  | 4.586000071  | 2.204009795   |
| C86   | 0.542180770  | 8.723277756  | 3.800415282   |
| C87   | 0.149635210  | 10.191005273 | 3.659532799   |
| C88   | -0.635638570 | 11.998408591 | 2.188317126   |
| C89   | -2.059122515 | 12.419932086 | 2.608736948   |
| C90   | -0.360296003 | 12.376473156 | 0.716912001   |
| C91   | -1.244098937 | 11.596005716 | -0.250903032  |
| C92   | -4.346856985 | 11.687844530 | 3.089875900   |
| C93   | -4.551284753 | 12.470083428 | 4.378972578   |
| C94   | -5.138684102 | 10.352653376 | 3.157266937   |
| C95   | -5.020100943 | 9.565670018  | 1.872406863   |
| C96   | -5.853250205 | 9.855779092  | 0.781379285   |
| C97   | -4.024715536 | 8.590046410  | 1.703130348   |
| C98   | -5.692800485 | 9.212494961  | -0.448040039  |
| C99   | -3.833374403 | 7.952008776  | 0.474179848   |
| C100  | -4.672449193 | 8.270162799  | -0.593414253  |
| C101  | 6.713050306  | -2.114397573 | -8.102365224  |
| C102  | 5.205840378  | -1.929680140 | -8.035719886  |
| C103  | 3.368560525  | -0.694895896 | -6.912428180  |
| C104  | 2.982271553  | 0.757253314  | -7.213289730  |
| C105  | 3.192429837  | 3.078306749  | -6.455259869  |
| C106  | 4.283894935  | 4.056003715  | -6.026843633  |
| C107  | 6.406888830  | 4.479740794  | -4.889688968  |
| C108  | 7.694155749  | 4.427019029  | -5.681696582  |
| C109  | 0.243414999  | -1.376647722 | -10.138172626 |
| C110  | -0.873062858 | -0.348587262 | -9.911064956  |
| C111  | 0.301841101  | -2.356329299 | -8.941535128  |
| C112  | 1.119016930  | -3.613334268 | -9.290575532  |
| C113  | 1.429357378  | -4.438383227 | -8.058156594  |
| C114  | -1.556311819 | 1.749520984  | -8.848488775  |
| C115  | -0.963809049 | 3.143100578  | -8.922975525  |
| C116  | -2.329967547 | 1.442878395  | -7.540007806  |
| C117  | -1.404834071 | 1.008893448  | -6.434417636  |
| C118  | -0.674230415 | 1.945172592  | -5.682802220  |
| C119  | -1.163614867 | -0.358198635 | -6.224740774  |
| C120  | 0.315528946  | 1.519658107  | -4.792142967  |
| C121  | -0.168590224 | -0.784749469 | -5.339777203  |
| C122  | 0.592211214  | 0.157539029  | -4.643511210  |
| C123  | 9.027485235  | -5.685955412 | -3.297948745  |
| C124  | 9.835766954  | -6.046610758 | -2.042215589  |
| C125  | 7.564372363  | -6.144802232 | -3.205669437  |
| C126  | 6.659577027  | -5.674789758 | -4.302930244  |
| C127  | 6.719644570  | -5.994243612 | -5.645284671  |
| C128  | 4.893930187  | -4.803331657 | -5.250250986  |
| C129  | 10.447495135 | -7.664316381 | -0.337270088  |
| C130  | 11.927475458 | -7.422295492 | -0.534510490  |
| C131  | 0.634376209  | -6.772840100 | -1.408626818  |
| C132  | 1.960123649  | -6.656776292 | -0.710425810  |
| C133  | 3.200910286  | -6.705417300 | -1.692301395  |
| C134  | 3.190127170  | -8.044185482 | -2.486079131  |
| C135  | 4.470178991  | -8.235860973 | -3.315369091  |
| C136  | 4.615753263  | -9.604973591 | -3.914706568  |
| C137  | 4.472629905  | -6.721714657 | -0.788908987  |
| C138  | 4.162024838  | -0.459870488 | -1.202624573  |
| Fe139 | 4.842926989  | -1.373391974 | -2.856997917  |
| Fe140 | 2.551094623  | 0.574516023  | -0.137515604  |
| Fe141 | 5.165639484  | 0.473479282  | 0.164222902   |
| Fe142 | 4.709261817  | 1.090208196  | -2.283018234  |
| Fe143 | 4.401682325  | 2.913075418  | -0.486862260  |
| Fe144 | 5.098730254  | -2.013184516 | -0.378798883  |
| Fe145 | 2.715832451  | -1.982542553 | -1.499123213  |
| H146  | -5.562196796 | -6.157298865 | -3.197923298  |
| H147  | -5.448820105 | -4.928546761 | -4.276789374  |
| H148  | -9.306019088 | -3.784310856 | -2.928738041  |

|      |              |              |               |
|------|--------------|--------------|---------------|
| H149 | -7.778746731 | -4.691975076 | -4.462591394  |
| H150 | -8.019368983 | -6.194668198 | -3.577814239  |
| H151 | -8.123881135 | -2.246304544 | -0.907893842  |
| H152 | -9.659116721 | -5.458177449 | -0.484789355  |
| H153 | -9.866913107 | -2.548244106 | -1.082014979  |
| H154 | -9.847810464 | -6.760660481 | 1.434969065   |
| H155 | -7.182076471 | -6.095966409 | 0.142503315   |
| H156 | -9.769208369 | -5.283636516 | 2.423798221   |
| H157 | -3.661247396 | -2.868881338 | 2.069155614   |
| H158 | -5.837054218 | -4.116626770 | 0.628710490   |
| H159 | -5.017548532 | -6.887174529 | 0.510784790   |
| H160 | -6.939043222 | -1.681500364 | 5.358817078   |
| H161 | -7.203014980 | -3.171504847 | 2.916286654   |
| H162 | -5.441142089 | -7.361451454 | 2.173335538   |
| H163 | -5.081223614 | -2.060581934 | 1.371118551   |
| H164 | -6.691083275 | -5.259274298 | 4.807507602   |
| H165 | -8.192365756 | -2.893839947 | 4.993678144   |
| H166 | -1.406693227 | -3.611426248 | 2.869469110   |
| H167 | -1.068241926 | -2.218596243 | 1.809450976   |
| H168 | 0.193806930  | -2.824135994 | 2.891451695   |
| H169 | -2.455635558 | -1.514287803 | 3.733339670   |
| H170 | -6.144956858 | -6.912486109 | 6.310457922   |
| H171 | -3.685958691 | 1.206708128  | 5.018537711   |
| H172 | -4.385081707 | -2.184353727 | 7.904600281   |
| H173 | -5.330129633 | 1.186432620  | 9.058273097   |
| H174 | -0.728899181 | 0.049461942  | 2.735991030   |
| H175 | 0.372984676  | -0.355428201 | 4.057573559   |
| H176 | 7.046842691  | 0.643766219  | 7.489024835   |
| H177 | -4.913915599 | 2.382239688  | 5.499323926   |
| H178 | -5.827349177 | 2.398874324  | 7.850765892   |
| H179 | -3.258074052 | 2.523125585  | 6.143142370   |
| H180 | -4.211655066 | 2.489216386  | 8.591179880   |
| H181 | -5.215945709 | 0.232122912  | 6.756790249   |
| H182 | -2.360911891 | 0.810110165  | 7.696077151   |
| H183 | -3.447826756 | -1.070968527 | 5.727327321   |
| H184 | -1.174599867 | 0.453507634  | 4.417431767   |
| H185 | 1.048561309  | 3.847945866  | 1.514128137   |
| H186 | -0.285383996 | 4.134668644  | 2.671997608   |
| H187 | 1.446172952  | 4.383576393  | 3.967799121   |
| H188 | 0.917002113  | 2.987833216  | 6.347871210   |
| H189 | 3.476097715  | 3.238925197  | 3.920340670   |
| H190 | 5.447835905  | 1.755997718  | 3.896481277   |
| H191 | 4.046243505  | -0.173594809 | 7.493170309   |
| H192 | -2.872650172 | -3.572718890 | 5.305837478   |
| H193 | -1.811477746 | -6.638347862 | 4.972401099   |
| H194 | -1.828601904 | -6.448000441 | 6.741292656   |
| H195 | -3.979338693 | -5.655035558 | 4.855508475   |
| H196 | -6.279489517 | -5.738484111 | 7.645042471   |
| H197 | 2.022017052  | 1.258904158  | 7.467972782   |
| H198 | -0.108518569 | -2.486617157 | 5.425360930   |
| H199 | -4.817646571 | -2.147654836 | 10.708946357  |
| H200 | -4.621110419 | -3.590788815 | 9.677711061   |
| H201 | -1.951188407 | -2.933807044 | 9.988852592   |
| H202 | 9.026393239  | -8.501266473 | 5.883546344   |
| H203 | -0.781292010 | -4.977351622 | -5.309149260  |
| H204 | 0.762156077  | -8.684618702 | -1.183615171  |
| H205 | 0.539295404  | -4.241063324 | -9.983059863  |
| H206 | 2.055090038  | -3.323787757 | -9.790676323  |
| H207 | -0.718470417 | -2.657489553 | -8.656520612  |
| H208 | -0.131378915 | 3.250378480  | -9.658405973  |
| H209 | -0.108183055 | -1.948737994 | -11.010925362 |
| H210 | -2.540504047 | -1.321870747 | -3.598211968  |
| H211 | -3.557092075 | -4.082308517 | -2.698476576  |
| H212 | 0.388969289  | 0.849279001  | -8.783307726  |
| H213 | -2.290079880 | 1.724679912  | -9.678567009  |
| H214 | 1.952567741  | -0.272839546 | -9.725125547  |
| H215 | -0.616248499 | -4.856892126 | -3.567133357  |
| H216 | 0.732544963  | -1.836528134 | -8.072525824  |
| H217 | 2.160815530  | -1.438846741 | -10.867753446 |
| H218 | -5.847878109 | -1.947413939 | -5.001048062  |
| H219 | -3.045960800 | -1.614920175 | -1.930470133  |
| H220 | 3.228888723  | -3.641511188 | -8.058680057  |
| H221 | -1.920365371 | -3.567162346 | -2.306491497  |
| H222 | -4.171007398 | 2.780554890  | 2.554128260   |
| H223 | -1.725217449 | 1.926704196  | 1.644684205   |
| H224 | -8.299103748 | 0.589184780  | 1.758745161   |
| H225 | -6.885254446 | 0.523955366  | -0.868299666  |
| H226 | -6.780004523 | 4.354223748  | 0.689969331   |
| H227 | -8.864275352 | 8.639879863  | 2.722779101   |
| H228 | -8.251004567 | 4.824301779  | 3.595621142   |

|      |               |              |              |
|------|---------------|--------------|--------------|
| H229 | -9.271239061  | 5.392078901  | 1.090717051  |
| H230 | -6.688152486  | 6.869781692  | 1.899879215  |
| H231 | -10.686632666 | 9.741589412  | -0.943491475 |
| H232 | -3.440390579  | 4.834338837  | 1.262518412  |
| H233 | -4.493077320  | 4.368486272  | -0.076402894 |
| H234 | -10.113094862 | 10.468078829 | 1.437059572  |
| H235 | -8.078052757  | 5.911504614  | -0.096318509 |
| H236 | -5.807700734  | 2.304417419  | 0.133424510  |
| H237 | -7.051073422  | -0.581067612 | 1.310704675  |
| H238 | -9.070534860  | 2.985223993  | -2.052670847 |
| H239 | -0.823955416  | 2.578749442  | -2.429487348 |
| H240 | -9.543782902  | 1.349451409  | -2.548147141 |
| H241 | -0.064000655  | 1.489307672  | -0.264901869 |
| H242 | 8.415598596   | 2.222897094  | 6.360815391  |
| H243 | 7.008588553   | 2.282093964  | 5.534675273  |
| H244 | 2.014423921   | 5.849976647  | 0.355395652  |
| H245 | -0.816332165  | 5.505549948  | 0.891035190  |
| H246 | 1.534192301   | 7.817709588  | 2.173417967  |
| H247 | -2.951784676  | 4.725212020  | -2.222542201 |
| H248 | -4.469824533  | 4.729823951  | -3.796191906 |
| H249 | -3.742613752  | 6.113099419  | -2.216118632 |
| H250 | -4.033387551  | 2.775981724  | -5.017767192 |
| H251 | -5.793858146  | 2.663047069  | -5.283401940 |
| H252 | 0.708176736   | 12.221066844 | 0.509135334  |
| H253 | -0.587403656  | 13.444271704 | 0.601354816  |
| H254 | 0.368223355   | 10.390416437 | -0.878123863 |
| H255 | -1.213452571  | 9.959387362  | -1.480348719 |
| H256 | -0.642080964  | 10.049107463 | -4.993438966 |
| H257 | -0.403010747  | 5.508401982  | -5.253843591 |
| H258 | -6.361781762  | 9.441469997  | -1.282787690 |
| H259 | -3.379857118  | 8.304406039  | 2.538946562  |
| H260 | -2.867104047  | 8.396214915  | -2.824405439 |
| H261 | 2.450828164   | 5.322792380  | -2.130726574 |
| H262 | 3.539926237   | 7.141066663  | -0.913456870 |
| H263 | 0.000662918   | 5.062964947  | -2.653006109 |
| H264 | -7.452334747  | 1.035281298  | -3.500294290 |
| H265 | 4.953204640   | 10.012166761 | -1.013424397 |
| H266 | -4.847455256  | 0.413485494  | -4.618768003 |
| H267 | 2.633051579   | 6.436046096  | -3.493326484 |
| H268 | -3.018908255  | 7.237929476  | 0.341713763  |
| H269 | -5.194070580  | 7.808678663  | -2.413935143 |
| H270 | 4.029957197   | 10.301211263 | 0.475119040  |
| H271 | 0.041852376   | 8.617350277  | -5.678971483 |
| H272 | -2.643531702  | 9.789444348  | -3.808180940 |
| H273 | -4.260560007  | -2.399349033 | -5.206370770 |
| H274 | -5.292798321  | -2.383399209 | -2.780208193 |
| H275 | -6.647678494  | 10.596753826 | 0.891524990  |
| H276 | -4.306338660  | 2.376492191  | -2.606859540 |
| H277 | 1.130922309   | 8.092444491  | -2.380537487 |
| H278 | 0.724155517   | 6.848531386  | -5.019933236 |
| H279 | 1.126994256   | 4.488783784  | -3.867464946 |
| H280 | -1.848696490  | 6.472601509  | -3.466986599 |
| H281 | -0.189962464  | 8.269026055  | 4.484753177  |
| H282 | -0.277053991  | 9.932295609  | 1.669006696  |
| H283 | 0.031922262   | 12.599485124 | 2.823060386  |
| H284 | 1.523060279   | 8.706554123  | 4.296295227  |
| H285 | -2.638377461  | 10.465375574 | 2.676289738  |
| H286 | 7.216267357   | -1.152498584 | -7.927789967 |
| H287 | 6.971500996   | -2.773825330 | -7.248186048 |
| H288 | 9.053647497   | -4.587930921 | -3.352707167 |
| H289 | 8.046533652   | -3.038485145 | -9.341045907 |
| H290 | 6.484491034   | -3.430929387 | -9.635056053 |
| H291 | 5.401250666   | 4.568917386  | 2.148915480  |
| H292 | 4.810051761   | 7.005218752  | 3.968846859  |
| H293 | 5.862592168   | 8.085198218  | -0.081485313 |
| H294 | 3.796258439   | 5.335146734  | 2.334489790  |
| H295 | 6.255674893   | 7.700030583  | 3.660943413  |
| H296 | 6.614861933   | 4.272344683  | -3.828189698 |
| H297 | 6.419725238   | 6.715676601  | 1.535759259  |
| H298 | 3.245257975   | -8.127094155 | 4.614564470  |
| H299 | 5.749388715   | -8.645176975 | 2.919553328  |
| H300 | 5.451760771   | 2.590727564  | -5.113816521 |
| H301 | 3.834489390   | -1.290022125 | 4.548033736  |
| H302 | 2.956361690   | 3.291708030  | -7.505911922 |
| H303 | 0.025728907   | -1.850149805 | -5.196234796 |
| H304 | 2.296553511   | 3.350764377  | -5.872728841 |
| H305 | 2.219487152   | -5.708901834 | 4.217220171  |
| H306 | 3.933775993   | 1.276697793  | -5.486988391 |
| H307 | 2.498422369   | -5.905539107 | 2.487542693  |
| H308 | 3.329544910   | -8.181301851 | 2.837403733  |

|       |              |               |              |
|-------|--------------|---------------|--------------|
| H309  | 4.959511919  | -6.211104035  | 2.908631511  |
| H310  | 4.672341359  | -6.087665266  | 4.656194220  |
| H311  | -3.051909851 | 0.643359909   | -7.759146231 |
| H312  | 3.972646079  | -10.546443409 | 4.408849353  |
| H313  | 3.476310242  | -12.400786537 | 2.075049047  |
| H314  | 1.384952042  | -0.170492263  | -3.973758252 |
| H315  | 4.104330782  | -13.041778885 | 4.856066469  |
| H316  | 2.689870193  | -13.198790816 | 4.044216547  |
| H317  | 3.636313111  | -3.879663016  | 2.334754141  |
| H318  | 0.893917500  | 2.236741504   | -4.204073275 |
| H319  | -1.757463764 | -1.096275439  | -6.769822707 |
| H320  | 7.667983873  | -9.873257604  | -1.080588738 |
| H321  | 7.542460563  | -7.249157440  | -3.195543541 |
| H322  | 6.219433820  | -8.397031838  | 0.222709279  |
| H323  | 7.269379082  | -10.307874538 | -2.506921530 |
| H324  | 7.619344711  | 3.919055932   | -6.673803903 |
| H325  | 6.185490234  | -5.247139282  | 0.560466618  |
| H326  | 2.078788509  | -7.449458856  | 0.043414961  |
| H327  | 5.445409495  | -0.493930807  | -6.589417741 |
| H328  | 3.090946797  | -8.877223825  | -1.771157103 |
| H329  | 5.320910485  | -5.509806089  | -7.196350185 |
| H330  | 3.951454684  | -4.298377696  | -5.423434345 |
| H331  | 4.920475780  | -13.241773648 | 2.658539148  |
| H332  | 4.649459548  | -2.001650723  | 3.199680070  |
| H333  | 7.660421760  | -6.362258264  | 2.093948421  |
| H334  | 6.767348540  | -4.013691747  | 1.309697810  |
| H335  | 7.489607744  | -7.836678278  | 3.975526077  |
| H336  | 1.824933435  | -3.983431887  | 5.440190812  |
| H337  | 3.755098220  | -10.850990023 | -5.048723087 |
| H338  | 4.478485536  | -7.493034414  | -4.127014886 |
| H339  | 5.359694010  | -8.069810075  | -2.698017718 |
| H340  | 2.317767957  | -8.051034162  | -3.155634942 |
| H341  | 3.183790867  | -0.934490935  | -5.852848967 |
| H342  | -0.875578269 | 3.010348750   | -5.818764588 |
| H343  | -2.892972822 | 2.349473642   | -7.272517906 |
| H344  | 1.995359786  | -5.674041151  | -0.221972515 |
| H345  | 7.803055688  | -7.850645732  | 1.664984959  |
| H346  | 6.644471632  | -9.678287908  | 0.987969763  |
| H347  | 2.811312244  | -2.740751411  | 6.133662090  |
| H348  | 7.448091708  | -6.560646995  | -6.213565951 |
| H349  | 7.143471778  | -5.816239761  | -2.247113117 |
| H350  | 2.760339763  | -1.346711023  | -7.543032110 |
| H351  | 6.008626498  | 5.505139571   | -4.962585571 |
| H352  | 5.943292858  | -1.137752732  | 6.188345284  |
| H353  | 6.454706501  | -0.384490177  | 4.661050028  |
| H354  | 10.633898307 | -5.819902294  | -4.568598363 |
| H355  | 9.801914780  | -7.222305020  | -4.431554841 |
| H356  | 10.310297456 | -8.743950325  | -0.172985958 |
| H357  | 8.994233735  | -7.959700315  | -1.870362312 |
| H358  | 12.268760262 | -7.459734446  | -1.596829629 |
| H359  | 10.102728275 | -7.143990438  | 0.570676651  |
| H360  | 9.108855991  | -0.546424263  | 5.536307747  |
| H361  | -3.741117605 | 12.347410617  | 5.136412964  |
| H362  | 7.594211899  | -8.379032211  | 6.940331106  |
| H363  | 7.574460547  | -5.788763405  | 6.044846581  |
| H364  | -4.744830671 | 12.298505095  | 2.262146868  |
| H365  | -4.775427776 | 9.757557560   | 4.009977696  |
| H366  | -6.188210926 | 10.613652024  | 3.357813676  |
| H367  | 1.430422795  | 1.475981920   | 0.396205447  |
| H368  | 0.219944184  | -1.142807873  | -0.486203984 |
| H369  | 1.529576238  | -2.922063914  | -1.486623357 |
| Mo370 | 4.445377723  | -3.979154829  | -2.133436187 |
| N371  | -6.019513378 | -5.734149147  | -4.009413644 |
| N372  | -8.671020751 | -3.882369339  | -2.139780494 |
| N373  | -9.321302287 | -5.044096529  | 0.380536248  |
| N374  | -6.948293109 | -6.369621973  | 1.096546083  |
| N375  | -5.232425431 | -4.133900943  | 1.451047233  |
| N376  | -6.577754249 | -2.913877371  | 3.684558537  |
| N377  | -6.319531025 | -4.935309585  | 5.703400194  |
| N378  | -3.534549477 | -5.750799989  | 5.773613237  |
| N379  | -1.863251821 | -3.547237983  | 5.456777621  |
| N380  | -2.782811022 | -0.805390800  | 6.457083712  |
| N381  | -3.981529624 | -1.841573258  | 8.776752765  |
| N382  | 3.499212226  | -12.588196220 | 4.167471087  |
| N383  | 4.663533072  | -10.213021822 | 3.728227808  |
| N384  | 3.287342151  | -4.158363484  | 3.261091951  |
| N385  | 2.688341683  | -3.429337711  | 5.398027014  |
| N386  | 4.110000004  | -2.146655103  | 4.070511037  |
| N387  | 7.173107926  | -8.134383735  | 4.924535640  |
| N388  | -4.881358258 | -1.686800647  | -4.788657262 |

|      |              |               |               |
|------|--------------|---------------|---------------|
| N389 | -1.116993384 | -4.603188730  | -4.421239936  |
| N390 | -5.067406957 | 0.720741592   | -3.661068717  |
| N391 | -7.524134370 | 1.773877896   | -2.804828339  |
| N392 | -7.624577515 | 0.765305160   | -0.195214271  |
| N393 | -5.595718224 | 2.212105954   | 1.128896145   |
| N394 | -2.434987025 | 3.401408172   | -1.244696600  |
| N395 | -0.964185784 | 1.997247954   | -0.372723236  |
| N396 | -6.635841409 | 4.776159753   | 1.605868382   |
| N397 | -9.714076750 | 7.891818194   | -0.409597094  |
| N398 | -9.880142630 | 9.559285053   | 1.045808896   |
| N399 | 7.810096400  | 1.679318228   | 5.740924723   |
| N400 | 5.706718881  | 6.851117831   | 3.496185209   |
| N401 | 5.040113792  | 8.467477635   | 0.377624592   |
| N402 | 2.843606015  | 7.823667999   | -1.253798173  |
| N403 | -1.112745310 | 6.997852649   | -3.988708903  |
| N404 | -0.483909459 | 9.049113120   | -4.927057138  |
| N405 | -2.232820185 | 8.949810764   | -3.406623260  |
| N406 | 1.057068667  | 6.235330973   | 0.373449664   |
| N407 | 0.602907238  | 7.917856558   | 2.590194335   |
| N408 | -0.331018213 | 10.593290265  | 2.445352361   |
| N409 | -0.646437644 | 10.546544445  | -0.869557019  |
| N410 | -2.933220283 | 11.418745634  | 2.874595363   |
| N411 | 7.104873536  | -2.647869007  | -9.409738498  |
| N412 | 4.772537168  | -0.950258574  | -7.217419717  |
| N413 | 3.465465855  | 1.659436625   | -6.334675170  |
| N414 | 5.390543598  | 3.576205792   | -5.400625132  |
| N415 | 1.504384958  | -0.733716717  | -10.526498090 |
| N416 | -0.544588316 | 0.765490399   | -9.199592803  |
| N417 | 9.687304609  | -6.206801197  | -4.512542417  |
| N418 | 5.507929963  | -4.922957029  | -4.076652399  |
| N419 | 5.600402733  | -5.433205776  | -6.222347095  |
| N420 | 9.678784032  | -7.293021175  | -1.513634651  |
| N421 | 2.229299151  | -0.534078615  | 1.240487472   |
| N422 | 2.002738407  | -1.168678584  | 2.145106077   |
| O423 | -6.634425229 | -4.611780297  | -1.429353956  |
| O424 | -8.446778149 | -3.196190282  | 1.387695055   |
| O425 | -7.624457069 | -6.339061769  | 3.282048763   |
| O426 | -4.047982335 | -5.401604940  | 2.925190057   |
| O427 | -4.529280692 | -2.205639291  | 4.346227231   |
| O428 | -6.151991206 | -3.215019812  | 7.191685637   |
| O429 | -3.855240698 | -6.243344935  | 7.992625951   |
| O430 | 0.021444730  | -4.842913308  | 5.744205724   |
| O431 | -0.672806037 | -1.018089373  | 7.301487884   |
| O432 | -2.991547277 | -0.146001708  | 9.927290054   |
| O433 | -2.762349514 | -3.287190548  | 11.827712132  |
| O434 | 5.816921658  | -10.964900263 | 1.866837184   |
| O435 | 5.451131784  | -8.983540225  | 6.189356686   |
| O436 | 9.413425397  | -6.120344502  | 6.863796756   |
| O437 | -5.246783694 | -0.122799800  | -1.538304849  |
| O438 | -2.946423160 | -3.715422324  | -5.439150648  |
| O439 | -6.391489497 | 3.342717937   | -1.601604824  |
| O440 | -5.217426532 | 4.371520621   | -4.350065472  |
| O441 | -9.622719733 | 1.837794580   | 0.180026858   |
| O442 | -6.170489137 | 1.248277445   | 3.123124932   |
| O443 | -5.353059736 | 4.857114675   | 3.486004069   |
| O444 | -8.091825380 | 6.793752577   | 4.111565911   |
| O445 | 8.652554332  | -1.348186979  | 7.358695456   |
| O446 | 1.543396277  | 3.196038161   | 5.630467458   |
| O447 | 3.549008330  | 8.245418605   | 2.084526584   |
| O448 | 2.178932730  | 10.023937603  | -1.256380953  |
| O449 | -0.606425055 | 7.254088144   | -0.816725449  |
| O450 | -1.360651042 | 6.805466385   | 3.013320802   |
| O451 | 1.544610185  | 4.989063456   | 3.206408188   |
| O452 | 0.244567633  | 10.952375817  | 4.631227086   |
| O453 | -2.358828091 | 13.618454876  | 2.710404107   |
| O454 | -2.444878732 | 11.877231282  | -0.399831480  |
| O455 | -5.544796579 | 13.145303565  | 4.597802208   |
| O456 | -4.443370699 | 7.627232991   | -1.816231515  |
| O457 | 4.443910503  | -2.683656031  | -8.691957308  |
| O458 | 2.283794973  | 1.062077482   | -8.205223496  |
| O459 | 4.101737386  | 5.265226492   | -6.248854651  |
| O460 | 8.744179228  | 4.908046771   | -5.286967052  |
| O461 | -2.022942159 | -0.544140499  | -10.340739106 |
| O462 | 0.619668917  | -5.181110746  | -7.514704925  |
| O463 | 2.670490464  | -4.300683038  | -7.543254946  |
| O464 | -1.366666667 | 4.103265229   | -8.282103297  |
| O465 | 10.677323878 | -5.262697561  | -1.563848597  |
| O466 | 12.719436401 | -7.275134405  | 0.386086816   |
| O467 | -0.027087060 | -5.839757677  | -1.840162738  |
| O468 | 0.139387828  | -8.043157938  | -1.576048975  |

|                 |      |                                    |               |              |
|-----------------|------|------------------------------------|---------------|--------------|
|                 | O469 | 5.564629548                        | -10.367702959 | -3.739226907 |
|                 | O470 | 3.569813016                        | -9.948705127  | -4.711084944 |
|                 | O471 | 5.284470747                        | -5.732452148  | -0.955280437 |
|                 | O472 | 4.669941087                        | -7.682496472  | -0.005163747 |
|                 | O473 | 3.193747118                        | -5.618835173  | -2.538693821 |
|                 | O474 | 8.076661069                        | -7.215907056  | 2.377835474  |
|                 | O475 | 6.632950239                        | -4.976598107  | 1.402485874  |
|                 | O476 | -3.254006555                       | 5.502024562   | -2.809107797 |
|                 | O477 | 8.041542024                        | -10.277877717 | -1.904406579 |
|                 | O478 | 7.026775693                        | -8.952243884  | 0.429830406  |
|                 | S479 | 4.428243983                        | 5.097839038   | -0.021424034 |
|                 | S480 | 2.814883108                        | 2.269457243   | -1.919331916 |
|                 | S481 | 3.113559117                        | -2.611769950  | -3.571380251 |
|                 | S482 | 3.856472240                        | 1.791486075   | 1.303193109  |
|                 | S483 | 1.003006577                        | -0.542100330  | -1.428170371 |
|                 | S484 | 5.478961863                        | 0.290502379   | -4.217991850 |
|                 | S485 | 3.415914934                        | -3.458682378  | -0.020231492 |
|                 | S486 | 6.330957849                        | 1.988011966   | -0.999632127 |
|                 | S487 | 6.461190620                        | -2.705567500  | -1.998633846 |
|                 | S488 | 6.069146343                        | -1.101203442  | 1.410242109  |
| <b>23 (S=2)</b> |      | <b>bm202b6x2x2n2nxtconex.car_2</b> |               |              |
| Fe(139) 2.330   | C1   | -8.055079660                       | -4.969722546  | -2.394123320 |
| Fe(140) 0.165   | C2   | -7.998629339                       | -4.184228573  | -1.079904702 |
| Fe(141) 2.708   | C3   | -9.146850991                       | -2.598471959  | 0.403121451  |
| Fe(142) -2.684  | C4   | -8.965782945                       | -3.312724607  | 1.741581257  |
| Fe(143) 3.183   | C5   | -9.287800697                       | -5.346568141  | 3.055680539  |
| Fe(144) -2.079  | C6   | -7.831265556                       | -5.737122739  | 3.339518062  |
| Fe(145) -0.123  | C7   | -5.626403568                       | -6.197238194  | 2.370122474  |
|                 | C8   | -4.814821982                       | -4.975652151  | 2.808049041  |
|                 | C9   | -4.556280016                       | -2.553268640  | 2.741851240  |
|                 | C10  | -4.869301280                       | -2.234404846  | 4.211155828  |
|                 | C11  | -6.468468713                       | -2.302755174  | 6.039521678  |
|                 | C12  | -5.691810034                       | -3.211922723  | 7.002433526  |
|                 | C13  | -5.029852426                       | -5.486852265  | 7.581551788  |
|                 | C14  | -3.497977212                       | -5.585610210  | 7.560359760  |
|                 | C15  | -1.479569791                       | -5.642825891  | 6.155694250  |
|                 | C16  | -0.571379834                       | -4.455749151  | 5.832019885  |
|                 | C17  | -0.453268717                       | -1.999477778  | 5.453462152  |
|                 | C18  | -0.611112796                       | -1.023324939  | 6.634122864  |
|                 | C19  | -0.841495245                       | -1.384502552  | 4.087453772  |
|                 | C20  | -0.041011257                       | -0.096418620  | 3.861364958  |
|                 | C21  | -0.659028275                       | -2.407890841  | 2.962765078  |
|                 | C22  | -2.130668551                       | 0.364857290   | 7.970025214  |
|                 | C23  | -2.078725904                       | -0.432840616  | 9.287014862  |
|                 | C24  | -3.448167163                       | 1.145873890   | 7.765523377  |
|                 | C25  | -3.796390717                       | 1.981590042   | 9.002396829  |
|                 | C26  | -3.343069796                       | 2.039752630   | 6.523450733  |
|                 | C27  | -2.704540466                       | -2.448840651  | 10.487182729 |
|                 | C28  | -1.287069701                       | -2.794496486  | 10.897187783 |
|                 | C29  | 3.917438526                        | -12.632023220 | 2.488396727  |
|                 | C30  | 4.704629054                        | -11.356698382 | 2.191103626  |
|                 | C31  | 5.131386328                        | -9.052138203  | 3.088188866  |
|                 | C32  | 6.155356715                        | -8.952712314  | 4.236160906  |
|                 | C33  | 4.000342962                        | -8.016801255  | 3.223612854  |
|                 | C34  | 4.446541308                        | -6.557155785  | 3.123766743  |
|                 | C35  | 3.229261243                        | -5.624574792  | 3.070614806  |
|                 | C36  | 3.760782390                        | -3.259111817  | 3.707550522  |
|                 | C37  | 8.469112141                        | -8.427743027  | 4.850349556  |
|                 | C38  | 8.815439567                        | -6.995905757  | 5.205519945  |
|                 | C39  | -5.158002898                       | -1.505272713  | -2.444236972 |
|                 | C40  | -5.453935007                       | -0.100075265  | -1.904041614 |
|                 | C41  | -3.630865244                       | -1.727959252  | -2.388708902 |
|                 | C42  | -3.168862100                       | -3.198694475  | -2.458151150 |
|                 | C43  | -2.974388963                       | -3.759488686  | -3.863754331 |
|                 | C44  | -5.727746448                       | 2.250192543   | -2.596518241 |
|                 | C45  | -7.036428334                       | 2.736434222   | -1.960841784 |
|                 | C46  | -5.406822163                       | 3.069355541   | -3.861897470 |
|                 | C47  | -9.108926159                       | 2.064532538   | -0.829198086 |
|                 | C48  | -8.825626943                       | 1.846556841   | 0.665605956  |
|                 | C49  | -7.253309884                       | 1.019724467   | 2.361362159  |
|                 | C50  | -6.226935150                       | 2.001025226   | 2.939269977  |
|                 | C51  | -4.283340245                       | 3.450976446   | 2.549468927  |
|                 | C52  | -4.795992332                       | 4.724979504   | 3.236411332  |
|                 | C53  | -3.381203454                       | 3.917776523   | 1.390499473  |
|                 | C54  | -2.814847882                       | 2.805032758   | 0.573623800  |
|                 | C55  | -2.553368623                       | 1.475619599   | 0.844022899  |
|                 | C56  | -1.935151448                       | 1.779333266   | -1.191719175 |
|                 | C57  | -6.397152677                       | 6.576561025   | 3.027472198  |
|                 | C58  | -6.504577346                       | 6.670019789   | 4.547981286  |



|      |              |              |               |
|------|--------------|--------------|---------------|
| C59  | -7.790125266 | 6.741880181  | 2.375108661   |
| C60  | -8.323049299 | 8.139950496  | 2.263142674   |
| C61  | -8.241684601 | 9.211358164  | 3.130477338   |
| C62  | -9.392992694 | 9.769740739  | 1.320076342   |
| C63  | 8.422425276  | 0.115271579  | 5.148359459   |
| C64  | 9.461638782  | -0.966662051 | 4.929481197   |
| C65  | 7.064965778  | -0.439264875 | 4.644834706   |
| C66  | 5.935969483  | 0.546185382  | 4.831179079   |
| C67  | 5.143647023  | 0.554394483  | 5.992676019   |
| C68  | 5.656709716  | 1.500880922  | 3.838316563   |
| C69  | 4.108433564  | 1.483018907  | 6.159667885   |
| C70  | 4.646932539  | 2.446841344  | 4.001147177   |
| C71  | 3.867392615  | 2.432592305  | 5.159036848   |
| C72  | 6.087729061  | 6.505230962  | 1.071260001   |
| C73  | 5.192900904  | 7.689157313  | 0.682417722   |
| C74  | 5.319248393  | 5.184929167  | 0.903972173   |
| C75  | 4.657196341  | 9.365902967  | -1.032865605  |
| C76  | 3.259225245  | 9.007820791  | -1.543799840  |
| C77  | 1.677982176  | 7.205542558  | -2.140302389  |
| C78  | 0.827840545  | 6.858543065  | -0.899384182  |
| C79  | 1.819834762  | 6.017807070  | -3.112279801  |
| C80  | 0.520324687  | 5.382897739  | -3.623704827  |
| C81  | -0.329036819 | 6.226790979  | -4.586530656  |
| C82  | -1.470354472 | 8.380167747  | -4.031026142  |
| C83  | 0.649735919  | 5.737957998  | 1.250272868   |
| C84  | 0.475635546  | 6.864232849  | 2.287315919   |
| C85  | 1.226834662  | 4.509960139  | 1.973070119   |
| C86  | 1.649051170  | 8.634012092  | 3.506210167   |
| C87  | 1.315140467  | 10.119446841 | 3.424308565   |
| C88  | 0.407885962  | 11.974834238 | 2.094407747   |
| C89  | -0.893784101 | 12.476251577 | 2.757718365   |
| C90  | 0.433101690  | 12.346098176 | 0.598124141   |
| C91  | -0.664925354 | 11.640806512 | -0.192909504  |
| C92  | -3.121841162 | 11.878225353 | 3.573716401   |
| C93  | -3.085632394 | 12.678132702 | 4.866865020   |
| C94  | -3.965228639 | 10.591018352 | 3.774437250   |
| C95  | -4.096895354 | 9.815544642  | 2.485159029   |
| C96  | -5.056362037 | 10.188289999 | 1.529835401   |
| C97  | -3.228259204 | 8.754635073  | 2.176257642   |
| C98  | -5.145893443 | 9.532672433  | 0.301098281   |
| C99  | -3.288976004 | 8.101658430  | 0.940375934   |
| C100 | -4.249901726 | 8.501625968  | 0.013333823   |
| C101 | 5.330671086  | -2.577669519 | -9.007372838  |
| C102 | 3.872773922  | -2.290285741 | -8.691262218  |
| C103 | 2.335378948  | -0.963861138 | -7.268618422  |
| C104 | 1.982679047  | 0.507461102  | -7.510888359  |
| C105 | 2.369594711  | 2.799580175  | -6.724085218  |
| C106 | 3.596505964  | 3.697673285  | -6.587304223  |
| C107 | 5.954425399  | 3.934188186  | -5.968528697  |
| C108 | 7.004243627  | 3.796497958  | -7.050325889  |
| C109 | -1.194144183 | -1.357719972 | -10.145315801 |
| C110 | -2.193781204 | -0.245072384 | -9.796174489  |
| C111 | -1.071520667 | -2.341749236 | -8.959012595  |
| C112 | -0.436428610 | -3.675577052 | -9.393475512  |
| C113 | -0.054076754 | -4.509089758 | -8.187874343  |
| C114 | -2.595201979 | 1.874569422  | -8.636050852  |
| C115 | -1.881185515 | 3.207143102  | -8.746039069  |
| C116 | -3.294850869 | 1.620318677  | -7.274829321  |
| C117 | -2.314090018 | 1.109447209  | -6.256211982  |
| C118 | -1.490492702 | 1.993118122  | -5.537765477  |
| C119 | -2.091888221 | -0.271779864 | -6.132644498  |
| C120 | -0.414377247 | 1.507707133  | -4.789685615  |
| C121 | -1.006167419 | -0.756678061 | -5.397409265  |
| C122 | -0.141417706 | 0.137049117  | -4.761728055  |
| C123 | 8.095637985  | -6.223066751 | -4.485514310  |
| C124 | 9.031131992  | -6.641015231 | -3.339527002  |
| C125 | 6.640420488  | -6.645293463 | -4.223901233  |
| C126 | 5.623993866  | -6.113594370 | -5.187315777  |
| C127 | 5.494748635  | -6.418049095 | -6.527652409  |
| C128 | 3.799686381  | -5.142041109 | -5.892224620  |
| C129 | 9.811423034  | -8.342717350 | -1.789390368  |
| C130 | 11.264094159 | -8.055683182 | -2.096130151  |
| C131 | 0.062597993  | -6.750162933 | -1.330369477  |
| C132 | 1.489043301  | -6.789384243 | -0.864438139  |
| C133 | 2.533578423  | -6.915090285 | -2.049280874  |
| C134 | 2.315360383  | -8.260208073 | -2.798826834  |
| C135 | 3.408351822  | -8.519326664 | -3.847827054  |
| C136 | 3.397811504  | -9.908584887 | -4.415094429  |
| C137 | 3.935508549  | -6.997053686 | -1.369513150  |
| C138 | 3.949085429  | -0.740636113 | -1.826277500  |

|       |               |              |               |
|-------|---------------|--------------|---------------|
| Fe139 | 4.350501320   | -1.694861288 | -3.550230159  |
| Fe140 | 2.458853150   | 0.343089806  | -0.655027447  |
| Fe141 | 5.132662508   | 0.164158037  | -0.546735977  |
| Fe142 | 4.487832356   | 0.790576148  | -2.996897675  |
| Fe143 | 4.327106136   | 2.698132778  | -1.209570410  |
| Fe144 | 4.829699107   | -2.326550596 | -1.105231395  |
| Fe145 | 2.422684573   | -2.122087021 | -1.919545922  |
| H146  | -6.266370003  | -5.919108103 | -2.139814998  |
| H147  | -6.205679086  | -4.699326498 | -3.230500764  |
| H148  | -9.856106437  | -3.382432075 | -1.454150477  |
| H149  | -8.539433394  | -4.350871441 | -3.166091980  |
| H150  | -8.739800167  | -5.817287449 | -2.214928607  |
| H151  | -8.349918132  | -1.843028404 | 0.349612502   |
| H152  | -9.931400192  | -4.983482031 | 1.033048174   |
| H153  | -10.114146396 | -2.077125284 | 0.415999960   |
| H154  | -9.890186524  | -6.260657290 | 2.975848647   |
| H155  | -7.407422677  | -5.665107417 | 1.332733282   |
| H156  | -9.641023723  | -4.774694759 | 3.923791157   |
| H157  | -3.464623841  | -2.620847362 | 2.659024108   |
| H158  | -5.898495974  | -3.743536536 | 1.551429091   |
| H159  | -5.253539816  | -6.553107804 | 1.400005362   |
| H160  | -6.261868413  | -1.267089830 | 6.342041776   |
| H161  | -6.847539172  | -2.797012039 | 3.977088038   |
| H162  | -5.450554803  | -6.980488472 | 3.116768731   |
| H163  | -4.896345608  | -1.729210748 | 2.098693879   |
| H164  | -6.159942425  | -4.875327083 | 5.863450400   |
| H165  | -7.542828514  | -2.498866954 | 6.156705985   |
| H166  | -1.267655622  | -3.307723383 | 3.137074394   |
| H167  | -0.963027659  | -1.967771142 | 2.001653560   |
| H168  | 0.390262201   | -2.714304704 | 2.858759802   |
| H169  | -1.910643983  | -1.125225955 | 4.130214112   |
| H170  | -5.429712568  | -6.484337143 | 7.348205178   |
| H171  | -3.091514027  | 1.465821903  | 5.620886671   |
| H172  | -3.380023797  | -1.886359415 | 8.550475762   |
| H173  | -3.952653239  | 1.360016478  | 9.895961039   |
| H174  | -0.260959460  | 0.327472258  | 2.871044547   |
| H175  | 1.041646941   | -0.284343522 | 3.898335136   |
| H176  | 8.340515914   | 0.286497094  | 6.238516415   |
| H177  | -4.293531543  | 2.556758011  | 6.336161653   |
| H178  | -4.718914851  | 2.552526590  | 8.819240155   |
| H179  | -2.559265892  | 2.800220696  | 6.668462024   |
| H180  | -2.990247465  | 2.698578425  | 9.225095699   |
| H181  | -4.259254441  | 0.411021308  | 7.607588164   |
| H182  | -1.302646383  | 1.085276756  | 8.050203905   |
| H183  | -2.630348374  | -0.783088852 | 6.217009038   |
| H184  | -0.279553512  | 0.663136937  | 4.621742228   |
| H185  | 1.517344882   | 3.747582523  | 1.228266855   |
| H186  | 0.424302963   | 4.096127990  | 2.603554189   |
| H187  | 2.382330591   | 4.312945126  | 3.557540308   |
| H188  | 2.322721357   | 3.203144948  | 6.048983086   |
| H189  | 4.425195192   | 3.155062027  | 3.202588770   |
| H190  | 6.206801167   | 1.479446613  | 2.895325094   |
| H191  | 5.328195211   | -0.180874392 | 6.781486109   |
| H192  | -2.179863148  | -3.209674171 | 5.843783334   |
| H193  | -1.353504822  | -6.369704015 | 5.339321359   |
| H194  | -1.093906708  | -6.102981875 | 7.075013587   |
| H195  | -3.468991874  | -5.256669124 | 5.518112356   |
| H196  | -5.307239719  | -5.244510960 | 8.615927851   |
| H197  | 3.483355615   | 1.457684149  | 7.057030454   |
| H198  | 0.614512598   | -2.253498529 | 5.433945034   |
| H199  | -3.213865875  | -1.984220373 | 11.347570364  |
| H200  | -3.220170974  | -3.394876965 | 10.256260002  |
| H201  | -0.537307986  | -2.757200649 | 10.072433380  |
| H202  | 9.373562412   | -8.947014327 | 4.498765132   |
| H203  | -1.738895010  | -4.963285332 | -4.957465557  |
| H204  | 0.031100611   | -8.675517598 | -1.205213306  |
| H205  | -1.164282230  | -4.244291496 | -9.990654400  |
| H206  | 0.449354747   | -3.487279710 | -10.017512621 |
| H207  | -2.067742814  | -2.542963852 | -8.534596894  |
| H208  | -1.105770008  | 3.240737112  | -9.548663317  |
| H209  | -1.689629630  | -1.897480921 | -10.967040341 |
| H210  | -3.159719506  | -1.143174615 | -3.194859645  |
| H211  | -3.902577421  | -3.847722829 | -1.947584043  |
| H212  | -0.737408841  | 0.806301593  | -8.759900830  |
| H213  | -3.391933803  | 1.933752757  | -9.405544138  |
| H214  | 0.633574773   | -0.399993322 | -9.935712884  |
| H215  | -1.288025334  | -4.824387596 | -3.264926438  |
| H216  | -0.480016540  | -1.864000135 | -8.164257114  |
| H217  | 0.610922473   | -1.567406943 | -11.095823287 |
| H218  | -6.645771451  | -1.968041570 | -3.808100063  |

|      |              |              |               |
|------|--------------|--------------|---------------|
| H219 | -3.264879498 | -1.298815233 | -1.444787151  |
| H220 | 1.785544571  | -3.839296236 | -8.391066916  |
| H221 | -2.230398040 | -3.302679998 | -1.896078315  |
| H222 | -3.691276102 | 2.906630581  | 3.300489795   |
| H223 | -2.730919607 | 0.942182721  | 1.775051441   |
| H224 | -8.144788470 | 1.086884045  | 2.996038884   |
| H225 | -7.002155436 | 0.936311487  | 0.240643721   |
| H226 | -6.364917672 | 4.741075585  | 1.922191415   |
| H227 | -7.750309053 | 9.339777334  | 4.088428723   |
| H228 | -6.828267389 | 5.719211662  | 5.034464497   |
| H229 | -8.511678981 | 6.090201917  | 2.899821929   |
| H230 | -5.713889261 | 7.364986220  | 2.674195752   |
| H231 | -9.969375335 | 10.384816406 | 0.633596412   |
| H232 | -2.584067370 | 4.529835846  | 1.845062687   |
| H233 | -3.960189303 | 4.595553053  | 0.741685696   |
| H234 | -9.049732868 | 11.176842382 | 2.882885415   |
| H235 | -7.719692213 | 6.353284696  | 1.346594805   |
| H236 | -5.264340253 | 2.207879247  | 1.125495893   |
| H237 | -6.848277637 | 0.002292276  | 2.470990349   |
| H238 | -9.426270338 | 3.108939456  | -0.946148591  |
| H239 | -1.526421577 | 1.640690181  | -2.190448000  |
| H240 | -9.953388961 | 1.423796936  | -1.118275420  |
| H241 | 1.426034934  | 1.309359855  | -0.098411571  |
| H242 | 9.561125719  | 1.800996670  | 4.884684118   |
| H243 | 8.035692384  | 1.945765378  | 4.311221685   |
| H244 | 2.364518486  | 5.710165081  | -0.085309053  |
| H245 | -0.365411172 | 5.488011845  | 0.910058315   |
| H246 | 2.288110418  | 7.667743816  | 1.751071885   |
| H247 | -2.481503244 | 3.864131624  | -1.264159981  |
| H248 | -3.963175092 | 5.229397434  | -2.802023673  |
| H249 | -3.686988877 | 6.336841311  | -1.715360140  |
| H250 | -5.100100538 | 8.087888007  | -1.689161393  |
| H251 | -4.430322220 | 2.755639752  | -4.256576007  |
| H252 | -6.173371020 | 2.879110951  | -4.632635033  |
| H253 | 1.433147230  | 12.126561194 | 0.197527273   |
| H254 | 0.259452777  | 13.428323339 | 0.527456435   |
| H255 | 0.734577578  | 10.384125915 | -1.149946296  |
| H256 | -0.957302821 | 10.063803817 | -1.468273132  |
| H257 | -0.748018583 | 10.100322291 | -4.877238347  |
| H258 | -0.880198919 | 5.572264854  | -5.278763138  |
| H259 | -5.902184075 | 9.828536388  | -0.429309053  |
| H260 | -2.488804999 | 8.407299801  | 2.903766427   |
| H261 | -2.835095285 | 8.525100214  | -2.498958396  |
| H262 | 2.402743213  | 5.224345651  | -2.618408389  |
| H263 | 3.709662525  | 6.991691670  | -1.504415087  |
| H264 | -0.105797789 | 5.039184340  | -2.784979656  |
| H265 | -7.813090863 | 0.864336947  | -2.049509719  |
| H266 | 5.203380943  | 9.851182333  | -1.853026647  |
| H267 | -5.658093019 | 0.438515685  | -3.825029452  |
| H268 | 2.421122191  | 6.361126393  | -3.970639392  |
| H269 | -2.577542353 | 7.311272516  | 0.695983396   |
| H270 | -6.067296915 | 4.630814120  | -2.910748691  |
| H271 | 4.507072919  | 10.113747556 | -0.241980160  |
| H272 | -0.217145002 | 8.645359654  | -5.645125565  |
| H273 | -2.715110345 | 9.905259089  | -3.516876604  |
| H274 | -5.097419423 | -2.337099510 | -4.321878207  |
| H275 | -5.625901733 | -2.195474339 | -1.717301353  |
| H276 | -5.751765428 | 11.003550551 | 1.745686289   |
| H277 | -4.956841605 | 2.478326131  | -1.840242631  |
| H278 | 1.151260892  | 8.037864052  | -2.623794917  |
| H279 | 0.329351054  | 6.849546936  | -5.206642087  |
| H280 | 0.814646891  | 4.472857742  | -4.165515456  |
| H281 | -1.977371128 | 6.573484377  | -3.261848181  |
| H282 | 1.039935809  | 8.219343059  | 4.323692400   |
| H283 | 0.563740414  | 9.888609802  | 1.533474502   |
| H284 | 1.210211136  | 12.534546992 | 2.596394818   |
| H285 | 2.704606735  | 8.568387107  | 3.806317541   |
| H286 | -1.588532299 | 10.564364033 | 2.866460842   |
| H287 | 5.933654505  | -1.668928062 | -8.866187740  |
| H288 | 5.662123382  | -3.303792225 | -8.235316954  |
| H289 | 8.144145950  | -5.125071526 | -4.515452602  |
| H290 | 6.395566128  | -3.488682343 | -10.488663334 |
| H291 | 4.788413428  | -3.810654197 | -10.527724697 |
| H292 | 6.009218007  | 4.353195636  | 1.097134883   |
| H293 | 5.751231318  | 6.751062670  | 3.064570453   |
| H294 | 6.159958513  | 7.847236353  | -1.121554491  |
| H295 | 4.497271943  | 5.143919562  | 1.632544215   |
| H296 | 7.140510347  | 7.444896010  | 2.559625356   |
| H297 | 6.396793383  | 3.680928309  | -4.991490575  |
| H298 | 6.967402531  | 6.487689762  | 0.408276604   |

|       |              |               |              |
|-------|--------------|---------------|--------------|
| H299  | 3.479404837  | -8.190844091  | 4.180019793  |
| H300  | 5.629535096  | -8.923271744  | 2.119729930  |
| H301  | 4.810268629  | 2.143525063   | -5.926719774 |
| H302  | 4.295265515  | -1.302139504  | 3.868227073  |
| H303  | 1.895550215  | 3.031959616   | -7.686130739 |
| H304  | -0.823312677 | -1.831704333  | -5.330799709 |
| H305  | 1.667893086  | 3.115016649   | -5.934860393 |
| H306  | 2.651646883  | -5.680936038  | 4.001486240  |
| H307  | 3.144369048  | 0.953137731   | -5.894362581 |
| H308  | 2.553784933  | -5.933558310  | 2.258466423  |
| H309  | 3.285188845  | -8.231849615  | 2.412919357  |
| H310  | 5.048293544  | -6.398708024  | 2.215020338  |
| H311  | 5.074956163  | -6.275822063  | 3.985118201  |
| H312  | -4.095708672 | 0.885628477   | -7.441904573 |
| H313  | 3.990634945  | -10.673046684 | 3.925892455  |
| H314  | 3.060952057  | -12.624625480 | 1.796444500  |
| H315  | 0.724589286  | -0.234918401  | -4.219622970 |
| H316  | 4.105949282  | -13.142915812 | 4.475200159  |
| H317  | 2.576255052  | -13.284490807 | 3.905134584  |
| H318  | 3.875001251  | -4.016527487  | 1.838741061  |
| H319  | 0.234851884  | 2.185548581   | -4.231314810 |
| H320  | -2.755698214 | -0.972237346  | -6.645124964 |
| H321  | 6.868772527  | -10.344396230 | -2.095894166 |
| H322  | 6.587019607  | -7.748644501  | -4.246236075 |
| H323  | 5.730299204  | -8.768383024  | -0.624886370 |
| H324  | 6.247284469  | -10.751634452 | -3.450517451 |
| H325  | 6.655867526  | 3.306350226   | -7.991726031 |
| H326  | 5.930045440  | -5.628702221  | -0.327001613 |
| H327  | 1.656178975  | -7.616826622  | -0.158217197 |
| H328  | 4.441169113  | -0.888681647  | -7.302745793 |
| H329  | 2.318952748  | -9.076013205  | -2.058362145 |
| H330  | 3.936627592  | -5.846458932  | -7.882944220 |
| H331  | 2.871577419  | -4.585226140  | -5.943346913 |
| H332  | 4.559334907  | -13.478202875 | 2.188094064  |
| H333  | 4.944062812  | -2.085776815  | 2.464648813  |
| H334  | 7.562993853  | -6.824817356  | 0.980565758  |
| H335  | 6.633164969  | -4.419635500  | 0.344466869  |
| H336  | 7.583535503  | -8.246731671  | 2.892679869  |
| H337  | 2.341089832  | -3.886503870  | 5.092492329  |
| H338  | 2.296114420  | -11.167436909 | -5.298535083 |
| H339  | 3.286801792  | -7.799981790  | -4.672355116 |
| H340  | 4.404716678  | -8.366763994  | -3.417870299 |
| H341  | 1.333873912  | -8.238473854  | -3.294416945 |
| H342  | 2.333749247  | -1.192196526  | -6.190770825 |
| H343  | -1.675371498 | 3.068512717   | -5.604755371 |
| H344  | -3.758493291 | 2.568697762   | -6.962406115 |
| H345  | 1.699919731  | -5.833133307  | -0.368400674 |
| H346  | 7.527830318  | -8.326392894  | 0.569149212  |
| H347  | 6.153476901  | -10.068573432 | 0.105875497  |
| H348  | 3.393364236  | -2.614862060  | 5.599893781  |
| H349  | 6.111995987  | -7.015595745  | -7.187454742 |
| H350  | 6.353959673  | -6.336534214  | -3.210796519 |
| H351  | 1.588946086  | -1.582923499  | -7.771777208 |
| H352  | 5.645462189  | 4.991899927   | -5.940104920 |
| H353  | 6.857305231  | -1.371519733  | 5.190590486  |
| H354  | 7.166320121  | -0.693198801  | 3.577424529  |
| H355  | 9.525022911  | -6.357237796  | -5.952531007 |
| H356  | 8.682883334  | -7.744833104  | -5.744595162 |
| H357  | 9.710544009  | -9.434999088  | -1.688756918 |
| H358  | 8.198389211  | -8.557648110  | -3.166307448 |
| H359  | 11.520371529 | -8.039288364  | -3.182693418 |
| H360  | 9.536002059  | -7.885752514  | -0.824820528 |
| H361  | 9.803398779  | -1.060787676  | 3.870430431  |
| H362  | -2.185945915 | 12.510883618  | 5.504505780  |
| H363  | 8.129132720  | -8.914132031  | 5.781082989  |
| H364  | 7.990173376  | -6.259044341  | 5.050940828  |
| H365  | -3.607144276 | 12.507658006  | 2.809287695  |
| H366  | -3.499221213 | 9.966905625   | 4.552573309  |
| H367  | -4.952695469 | 10.901231845  | 4.143614269  |
| H368  | 0.023963452  | -1.153341132  | -0.681908201 |
| H369  | 1.187232324  | -2.979123994  | -1.755808984 |
| Mo370 | 3.838937627  | -4.267893164  | -2.730556102 |
| N371  | -6.788335219 | -5.472109669  | -2.898229392 |
| N372  | -9.117431382 | -3.473663178  | -0.761130220 |
| N373  | -9.460189247 | -4.573176933  | 1.835449020  |
| N374  | -7.051934518 | -5.939360106  | 2.247844535  |
| N375  | -5.182444120 | -3.782419062  | 2.277726734  |
| N376  | -6.121381510 | -2.517270776  | 4.641785002  |
| N377  | -5.635876995 | -4.528406018  | 6.671057936  |
| N378  | -2.890666496 | -5.358614624  | 6.358088424  |

|      |              |               |               |
|------|--------------|---------------|---------------|
| N379 | -1.164693399 | -3.244157152  | 5.752509194   |
| N380 | -1.859400178 | -0.511262458  | 6.829720417   |
| N381 | -2.741086829 | -1.618731030  | 9.300325560   |
| N382 | 3.413712092  | -12.701698774 | 3.865384011   |
| N383 | 4.553717228  | -10.391470219 | 3.115979611   |
| N384 | 3.609143954  | -4.236359907  | 2.805635161   |
| N385 | 3.216836750  | -3.368659148  | 4.942030083   |
| N386 | 4.503229041  | -2.182622676  | 3.402120586   |
| N387 | 7.393195109  | -8.527302137  | 3.880138768   |
| N388 | -5.675306182 | -1.645937936  | -3.811294256  |
| N389 | -1.895402041 | -4.547688321  | -4.039923927  |
| N390 | -5.678643618 | 0.828992756   | -2.871838757  |
| N391 | -7.984584596 | 1.807951657   | -1.709887089  |
| N392 | -7.647593473 | 1.240182897   | 0.980486297   |
| N393 | -5.381310051 | 2.616508012   | 2.053813600   |
| N394 | -2.416382641 | 2.982928392   | -0.741479837  |
| N395 | -2.014983468 | 0.847023163   | -0.255392918  |
| N396 | -5.907295857 | 5.256636637   | 2.669824819   |
| N397 | -9.047873748 | 8.500880714   | 1.137147329   |
| N398 | -8.924611615 | 10.238724924  | 2.511925564   |
| N399 | 8.825518837  | 1.297939784   | 4.382858417   |
| N400 | 6.565092140  | 6.603717552   | 2.458411403   |
| N401 | 5.458973039  | 8.272482930   | -0.520038142  |
| N402 | 3.004575505  | 7.702887302   | -1.773559074  |
| N403 | -1.314335221 | 7.069568902   | -3.896850655  |
| N404 | -0.840830891 | 9.095277410   | -4.984796482  |
| N405 | -2.272690887 | 9.058103628   | -3.167535946  |
| N406 | 1.428664497  | 6.125236474   | 0.077799519   |
| N407 | 1.445779309  | 7.826478058   | 2.312533731   |
| N408 | 0.671088794  | 10.553360642  | 2.300441159   |
| N409 | -0.252117426 | 10.615082532  | -0.978896843  |
| N410 | -1.776768392 | 11.524967931  | 3.145471808   |
| N411 | 5.472223824  | -3.061691627  | -10.383736126 |
| N412 | 3.646822224  | -1.292130867  | -7.815671712  |
| N413 | 2.579700102  | 1.367659019   | -6.662880961  |
| N414 | 4.773150972  | 3.129398264   | -6.217981157  |
| N415 | 0.058948756  | -0.812794468  | -10.681637623 |
| N416 | -1.711805990 | 0.808882726   | -9.081495738  |
| N417 | 8.584106470  | -6.725229639  | -5.784719381  |
| N418 | 4.553582094  | -5.304409364  | -4.808136627  |
| N419 | 4.339991543  | -5.795786757  | -6.951620138  |
| N420 | 8.936958038  | -7.918197407  | -2.872214762  |
| N421 | 2.238318764  | -0.684104493  | 0.792551781   |
| N422 | 2.107491030  | -1.280784426  | 1.741060572   |
| O423 | -7.020193181 | -4.230197679  | -0.311246372  |
| O424 | -8.400092675 | -2.745333023  | 2.690031322   |
| O425 | -7.425841338 | -5.881036958  | 4.505093269   |
| O426 | -3.878191247 | -5.083904075  | 3.615659305   |
| O427 | -4.005871321 | -1.756638604  | 4.966058901   |
| O428 | -5.174888149 | -2.762888608  | 8.038671405   |
| O429 | -2.892290367 | -5.900781355  | 8.592966127   |
| O430 | 0.645514825  | -4.664051779  | 5.655900773   |
| O431 | 0.347490391  | -0.730437702  | 7.362206160   |
| O432 | -1.442921760 | -0.032461829  | 10.274804233  |
| O433 | -0.982078356 | -3.142754725  | 12.027793013  |
| O434 | 5.380435715  | -11.278849280 | 1.143424366   |
| O435 | 5.831573538  | -9.271805183  | 5.394261649   |
| O436 | 9.901089118  | -6.654769646  | 5.648343272   |
| O437 | -5.488807007 | 0.159006528   | -0.684171866  |
| O438 | -3.768857959 | -3.511914375  | -4.799217766  |
| O439 | -7.159332436 | 3.941149752   | -1.653255208  |
| O440 | -5.341155270 | 4.471699132   | -3.569893523  |
| O441 | -9.666642264 | 2.209151127   | 1.498079926   |
| O442 | -6.182497605 | 2.212983155   | 4.154220389   |
| O443 | -4.179616070 | 5.267427815   | 4.159326120   |
| O444 | -6.336953337 | 7.695256829   | 5.189393294   |
| O445 | 9.897408987  | -1.700077121  | 5.806954156   |
| O446 | 2.850435796  | 3.365666216   | 5.245741026   |
| O447 | 4.282029498  | 8.106721537   | 1.421716211   |
| O448 | 2.444917381  | 9.934755227   | -1.743140750  |
| O449 | -0.350428469 | 7.244117556   | -0.820198060  |
| O450 | -0.481710178 | 6.839156603   | 3.071958483   |
| O451 | 2.348295818  | 4.898089184   | 2.774549363   |
| O452 | 1.607276695  | 10.871860330  | 4.362849196   |
| O453 | -1.092455145 | 13.687785401  | 2.930392556   |
| O454 | -1.858081965 | 11.965541069  | -0.073209263  |
| O455 | -3.997576902 | 13.410913134  | 5.217265370   |
| O456 | -4.272763383 | 7.851781146   | -1.227651880  |
| O457 | 2.965720651  | -2.991318554  | -9.208585299  |
| O458 | 1.212267730  | 0.859834263   | -8.432240337  |

|                 |      |                                        |               |               |
|-----------------|------|----------------------------------------|---------------|---------------|
|                 | O459 | 3.459943899                            | 4.915414468   | -6.795133225  |
|                 | O460 | 8.150094349                            | 4.201301548   | -6.930046024  |
|                 | O461 | -3.388056166                           | -0.328679655  | -10.130941748 |
|                 | O462 | -0.851291417                           | -5.186237168  | -7.549377428  |
|                 | O463 | 1.238473727                            | -4.444003875  | -7.800570555  |
|                 | O464 | -2.133949948                           | 4.193768368   | -8.070567288  |
|                 | O465 | 9.909079821                            | -5.874453002  | -2.901139495  |
|                 | O466 | 12.126076252                           | -7.943057194  | -1.236097043  |
|                 | O467 | -0.562663523                           | -5.737287363  | -1.608236223  |
|                 | O468 | -0.578378820                           | -7.957869455  | -1.463989598  |
|                 | O469 | 4.351085004                            | -10.685071320 | -4.422729225  |
|                 | O470 | 2.197845877                            | -10.254609004 | -4.953152941  |
|                 | O471 | 4.752463616                            | -6.043961110  | -1.669390943  |
|                 | O472 | 4.217115684                            | -7.965122282  | -0.622526025  |
|                 | O473 | 2.441959080                            | -5.837213910  | -2.903140703  |
|                 | O474 | 7.962386212                            | -7.702737039  | 1.208631056   |
|                 | O475 | 6.520391283                            | -5.386949492  | 0.430503523   |
|                 | O476 | -3.239917286                           | 5.679931298   | -2.292170700  |
|                 | O477 | 7.093666683                            | -10.778898655 | -2.958221149  |
|                 | O478 | 6.512435446                            | -9.383867170  | -0.516355402  |
|                 | S479 | 4.597110086                            | 4.980366297   | -0.786736762  |
|                 | S480 | 2.645800312                            | 1.999443235   | -2.513528072  |
|                 | S481 | 2.468867244                            | -2.804392623  | -4.016161442  |
|                 | S482 | 3.892606308                            | 1.568570757   | 0.746460391   |
|                 | S483 | 0.759275999                            | -0.652650381  | -1.713306231  |
|                 | S484 | 4.958494347                            | -0.101855615  | -4.999103837  |
|                 | S485 | 3.146307480                            | -3.663490728  | -0.508533631  |
|                 | S486 | 6.230728623                            | 1.669811446   | -1.935179338  |
|                 | S487 | 5.940400094                            | -3.152204125  | -2.861267520  |
|                 | S488 | 6.090344669                            | -1.567024304  | 0.531706844   |
| <b>24 (S=1)</b> |      | <b>bm12b6x2x6n2nxt1conexdnti.car_2</b> |               |               |
| Fe(139) 2.574   | C1   | -4.792416234                           | -4.222876238  | 7.503423139   |
| Fe(140) -1.136  | C2   | -4.935413419                           | -2.734796299  | 7.170863310   |
| Fe(141) 2.769   | C3   | -6.485022584                           | -0.864120625  | 6.785586701   |
| Fe(142) -2.226  | C4   | -5.825713945                           | 0.198009844   | 7.662669486   |
| Fe(143) 2.734   | C5   | -4.977930772                           | 0.815338337   | 9.872036914   |
| Fe(144) -2.062  | C6   | -3.488491847                           | 1.012909787   | 9.568279373   |
| Fe(145) 0.003   | C7   | -1.467446375                           | 0.061815941   | 8.567027231   |
|                 | C8   | -1.309274743                           | 0.924542407   | 7.310881256   |
|                 | C9   | -2.293171253                           | 1.693514646   | 5.215809683   |
|                 | C10  | -2.539672747                           | 3.164277111   | 5.582245236   |
|                 | C11  | -3.721875431                           | 4.775896366   | 6.951226561   |
|                 | C12  | -2.510240974                           | 5.427869648   | 7.629514719   |
|                 | C13  | -0.750807901                           | 5.229458207   | 9.305889384   |
|                 | C14  | 0.606401177                            | 5.304609706   | 8.591472016   |
|                 | C15  | 2.234705037                            | 4.108090746   | 7.192314344   |
|                 | C16  | 2.385458490                            | 4.256667674   | 5.678131000   |
|                 | C17  | 1.220182991                            | 4.621945629   | 3.520706487   |
|                 | C18  | 0.744886293                            | 6.039393747   | 3.153723764   |
|                 | C19  | 0.438499516                            | 3.491324869   | 2.812403063   |
|                 | C20  | 0.460810415                            | 3.710187680   | 1.295528753   |
|                 | C21  | 0.998613607                            | 2.122689359   | 3.213661066   |
|                 | C22  | -1.097041199                           | 7.657863613   | 3.140144871   |
|                 | C23  | -0.553901846                           | 8.656110548   | 4.178722352   |
|                 | C24  | -2.640190829                           | 7.628456885   | 3.045156365   |
|                 | C25  | -3.224028654                           | 9.040788555   | 2.930547089   |
|                 | C26  | -3.081588200                           | 6.769763423   | 1.853105738   |
|                 | C27  | -0.018192922                           | 9.100643878   | 6.508264415   |
|                 | C28  | 1.365737588                            | 9.632206628   | 6.200476603   |
|                 | C29  | 10.172347007                           | -1.458172147  | 8.855884099   |
|                 | C30  | 10.142049607                           | -1.226365323  | 7.345185804   |
|                 | C31  | 9.303029956                            | 0.379693500   | 5.610557909   |
|                 | C32  | 10.252143135                           | 1.563539500   | 5.337402810   |
|                 | C33  | 7.825516022                            | 0.782572532   | 5.464224635   |
|                 | C34  | 7.423056597                            | 1.188143523   | 4.045716454   |
|                 | C35  | 5.903863020                            | 1.376323573   | 3.942553760   |
|                 | C36  | 5.318502033                            | 2.806580409   | 1.970882877   |
|                 | C37  | 12.042669060                           | 2.437057979   | 3.913832676   |
|                 | C38  | 11.663628113                           | 3.263032054   | 2.702386804   |
|                 | C39  | -4.034044236                           | -3.200634371  | 3.178391785   |
|                 | C40  | -4.812192169                           | -2.213956716  | 2.292631729   |
|                 | C41  | -2.546191468                           | -3.118949397  | 2.762609242   |
|                 | C42  | -1.511829842                           | -3.695761711  | 3.756705810   |
|                 | C43  | -1.239968291                           | -5.190773906  | 3.621581123   |
|                 | C44  | -6.120367253                           | -2.018483515  | 0.197747441   |
|                 | C45  | -7.184215195                           | -1.034319264  | 0.686775674   |
|                 | C46  | -6.692185061                           | -3.020253533  | -0.839269287  |
|                 | C47  | -8.859174260                           | -0.512164525  | 2.399331727   |
|                 | C48  | -8.282542609                           | 0.785182718   | 2.981635120   |

|      |               |               |               |
|------|---------------|---------------|---------------|
| C49  | -6.259736816  | 2.049210503   | 3.559029641   |
| C50  | -5.574717014  | 2.853382790   | 2.448055965   |
| C51  | -5.166559540  | 3.150425509   | 0.047594211   |
| C52  | -6.174139970  | 4.257755662   | -0.301720129  |
| C53  | -5.044524746  | 2.310260965   | -1.239205002  |
| C54  | -3.876118232  | 1.386565898   | -1.349515838  |
| C55  | -2.532931651  | 1.627667812   | -1.142866656  |
| C56  | -2.807914148  | -0.398930569  | -1.973403857  |
| C57  | -8.502181170  | 4.636462841   | -0.926645636  |
| C58  | -8.456352169  | 6.086002890   | -0.450149141  |
| C59  | -9.871783318  | 3.996559076   | -0.606461521  |
| C60  | -11.012941583 | 4.351106974   | -1.515291537  |
| C61  | -11.283854917 | 5.501267205   | -2.230417736  |
| C62  | -12.882852150 | 4.000610507   | -2.547902419  |
| C63  | 7.801360881   | 5.328524890   | -2.968859733  |
| C64  | 9.241991511   | 4.969339132   | -2.658142238  |
| C65  | 6.918393962   | 4.658136199   | -1.881520759  |
| C66  | 5.457152637   | 5.002762048   | -2.039224798  |
| C67  | 4.912825034   | 6.160991061   | -1.454767613  |
| C68  | 4.606789052   | 4.191245652   | -2.809279760  |
| C69  | 3.566447714   | 6.502464847   | -1.633590928  |
| C70  | 3.267763810   | 4.527168283   | -3.010360761  |
| C71  | 2.749676317   | 5.684126281   | -2.421771069  |
| C72  | 2.188872102   | 3.284096042   | -8.043991079  |
| C73  | 0.781717259   | 3.268660345   | -8.658053252  |
| C74  | 2.155157628   | 2.722017913   | -6.613359433  |
| C75  | -0.724515005  | 2.160880169   | -10.259991341 |
| C76  | -1.840079260  | 1.534095750   | -9.420152152  |
| C77  | -2.419330004  | 0.326970617   | -7.342524212  |
| C78  | -2.845515727  | 1.378208684   | -6.293619443  |
| C79  | -1.822785339  | -0.945541974  | -6.709589592  |
| C80  | -2.643865841  | -1.645966770  | -5.620063632  |
| C81  | -3.891625236  | -2.424091899  | -6.068443602  |
| C82  | -5.857145555  | -1.330717410  | -7.158537036  |
| C83  | -2.206201098  | 3.140131013   | -4.740642320  |
| C84  | -2.829658507  | 4.436307056   | -5.294228197  |
| C85  | -1.009324618  | 3.515682238   | -3.856739816  |
| C86  | -2.620170347  | 6.173767827   | -7.006540041  |
| C87  | -3.712838360  | 6.479853347   | -8.027111331  |
| C88  | -5.592634438  | 5.641607297   | -9.371553439  |
| C89  | -6.920035759  | 6.279631347   | -8.907527660  |
| C90  | -5.853340621  | 4.306634279   | -10.100827610 |
| C91  | -6.471171315  | 3.262399987   | -9.175717253  |
| C92  | -8.395545758  | 6.751262210   | -7.004830735  |
| C93  | -8.676638557  | 8.222208604   | -7.276667783  |
| C94  | -8.406446035  | 6.485491574   | -5.474345761  |
| C95  | -8.251257986  | 5.018000178   | -5.148497438  |
| C96  | -9.372430464  | 4.174856502   | -5.117782235  |
| C97  | -6.987723980  | 4.447512798   | -4.926582620  |
| C98  | -9.240990240  | 2.804055138   | -4.882660994  |
| C99  | -6.833624193  | 3.073140357   | -4.719488893  |
| C100 | -7.967077190  | 2.263117297   | -4.699994745  |
| C101 | 4.814465430   | -9.003996630  | -3.138979853  |
| C102 | 3.467675619   | -8.685782718  | -2.510015329  |
| C103 | 1.642077439   | -6.997532083  | -2.413928379  |
| C104 | 0.594935793   | -6.798319615  | -3.515914363  |
| C105 | -0.071282694  | -5.377690257  | -5.403114435  |
| C106 | 0.591912617   | -4.950623415  | -6.711269861  |
| C107 | 2.608312721   | -4.184614208  | -7.874765831  |
| C108 | 3.355308181   | -5.225499688  | -8.681852716  |
| C109 | -1.558215981  | -10.088285536 | -1.229749643  |
| C110 | -2.937052975  | -9.486802770  | -1.545825531  |
| C111 | -0.868923363  | -9.253208754  | -0.127272408  |
| C112 | 0.300655374   | -10.013439554 | 0.523134283   |
| C113 | 1.130698157   | -9.076794339  | 1.376523084   |
| C114 | -4.194902503  | -7.748804193  | -2.741370546  |
| C115 | -4.232130545  | -7.417036591  | -4.222307533  |
| C116 | -4.514548764  | -6.550625985  | -1.807538119  |
| C117 | -3.276653650  | -5.758882011  | -1.483215719  |
| C118 | -2.754891435  | -4.820154607  | -2.388924129  |
| C119 | -2.537355996  | -6.067347597  | -0.331629593  |
| C120 | -1.494992569  | -4.255768212  | -2.178619686  |
| C121 | -1.270179582  | -5.515417342  | -0.127715359  |
| C122 | -0.737145475  | -4.628912315  | -1.064181769  |
| C123 | 9.429234627   | -5.987462130  | -0.438815197  |
| C124 | 10.615720647  | -5.018364892  | -0.295904834  |
| C125 | 8.421219041   | -5.864612831  | 0.714052646   |
| C126 | 7.122742616   | -6.588870638  | 0.527955537   |
| C127 | 6.900413140   | -7.949652057  | 0.449333558   |
| C128 | 4.957451426   | -6.883614234  | 0.449562255   |

|       |              |               |              |
|-------|--------------|---------------|--------------|
| C129  | 12.307021927 | -3.965516787  | 1.099268999  |
| C130  | 13.455595489 | -4.324201323  | 0.181341525  |
| C131  | 3.375084419  | -3.578387690  | 5.145677457  |
| C132  | 4.624634209  | -2.971802470  | 4.568784197  |
| C133  | 5.519134472  | -4.018459059  | 3.788058182  |
| C134  | 5.958873577  | -5.160161647  | 4.747754535  |
| C135  | 6.962291684  | -6.115740167  | 4.082834728  |
| C136  | 7.558416443  | -7.131150564  | 5.015287701  |
| C137  | 6.810614437  | -3.261295663  | 3.351908156  |
| C138  | 3.462760362  | -1.696285335  | -1.865461425 |
| Fe139 | 4.099830126  | -3.577639233  | -1.725059285 |
| Fe140 | 1.600081175  | -0.880121260  | -2.212507106 |
| Fe141 | 4.189763823  | -0.119604027  | -2.802393491 |
| Fe142 | 3.157868369  | -2.321232348  | -3.717002776 |
| Fe143 | 2.249179631  | -0.115325802  | -4.742811006 |
| Fe144 | 5.145382640  | -1.454131098  | -0.826427881 |
| Fe145 | 2.688391482  | -1.536802474  | 0.159794933  |
| H146  | -2.762195930 | -4.271240723  | 7.310200013  |
| H147  | -3.550249441 | -4.955212842  | 6.045877978  |
| H148  | -6.983572280 | -2.889053471  | 7.247491386  |
| H149  | -5.655517277 | -4.778583591  | 7.106700285  |
| H150  | -4.863610131 | -4.295846490  | 8.604053775  |
| H151  | -6.148634042 | -0.669227992  | 5.757042636  |
| H152  | -5.961175572 | -1.014903810  | 9.311720053  |
| H153  | -7.572656942 | -0.712737260  | 6.819608965  |
| H154  | -5.079808481 | 0.434534461   | 10.896663140 |
| H155  | -3.390814359 | -0.846422953  | 8.692460978  |
| H156  | -5.447731472 | 1.806864445   | 9.829656084  |
| H157  | -1.330908946 | 1.651575984   | 4.692462156  |
| H158  | -3.022325900 | 0.119702521   | 6.486757791  |
| H159  | -1.081443541 | -0.947715248  | 8.370133644  |
| H160  | -3.985313540 | 5.406592113   | 6.091494647  |
| H161  | -4.067641919 | 2.649139927   | 6.883428457  |
| H162  | -0.849056103 | 0.523953598   | 9.346369153  |
| H163  | -3.072083714 | 1.347976276   | 4.523367602  |
| H164  | -2.221493112 | 3.748811704   | 8.807615759  |
| H165  | -4.567912633 | 4.772689084   | 7.651779053  |
| H166  | 0.943914576  | 1.966197404   | 4.301034492  |
| H167  | 0.430473966  | 1.317310274   | 2.724806417  |
| H168  | 2.049255792  | 2.012786989   | 2.909001047  |
| H169  | -0.607608161 | 3.537545354   | 3.152723580  |
| H170  | -0.613102843 | 4.619524707   | 10.210001835 |
| H171  | -2.703153273 | 5.741061731   | 1.916028209  |
| H172  | -0.989069424 | 7.369863457   | 5.756552636  |
| H173  | -2.960671590 | 9.674128886   | 3.790022162  |
| H174  | -0.055413979 | 2.882823901   | 0.788184735  |
| H175  | 1.487794149  | 3.739612127   | 0.906046235  |
| H176  | 7.704321542  | 6.425737796   | -2.854699863 |
| H177  | -4.177601344 | 6.707288486   | 1.806631766  |
| H178  | -4.320917341 | 8.983648665   | 2.869003341  |
| H179  | -2.724813161 | 7.215964710   | 0.910512500  |
| H180  | -2.858842081 | 9.537732286   | 2.017538418  |
| H181  | -3.025140191 | 7.170363399   | 3.975415285  |
| H182  | -0.690161889 | 8.008230503   | 2.179925416  |
| H183  | -1.173236533 | 5.608640064   | 3.808531967  |
| H184  | -0.042302924 | 4.647326032   | 1.012616292  |
| H185  | -0.480860343 | 2.592924401   | -3.555991642 |
| H186  | -1.414766200 | 3.999500929   | -2.953752490 |
| H187  | 0.373391932  | 4.905907259   | -3.887272189 |
| H188  | 1.160010331  | 6.772622927   | -2.167546944 |
| H189  | 2.618749975  | 3.874243204   | -3.593024682 |
| H190  | 4.982062091  | 3.257957638   | -3.236558323 |
| H191  | 5.545914840  | 6.806958333   | -0.840931163 |
| H192  | 0.362253447  | 4.450744473   | 5.478201046  |
| H193  | 2.623036356  | 3.111879180   | 7.452940048  |
| H194  | 2.891079313  | 4.857405851   | 7.656086608  |
| H195  | 0.272811631  | 3.467268720   | 7.700325384  |
| H196  | -0.993343457 | 6.254399376   | 9.614674056  |
| H197  | 3.154131652  | 7.396065344   | -1.156907194 |
| H198  | 2.267154499  | 4.585014406   | 3.194384846  |
| H199  | -0.690465128 | 9.951201934   | 6.708850373  |
| H200  | 0.060904201  | 8.507307813   | 7.432990911  |
| H201  | 1.987210139  | 8.985455945   | 5.536961047  |
| H202  | 13.031952495 | 1.982965035   | 3.748965246  |
| H203  | 0.291779324  | -6.542436928  | 3.448053866  |
| H204  | 4.365239928  | -3.894415927  | 6.771948739  |
| H205  | -0.095622081 | -10.808869025 | 1.170994860  |
| H206  | 0.930716028  | -10.480936184 | -0.248257520 |
| H207  | -1.596795571 | -8.993513698  | 0.656261759  |
| H208  | -3.702272837 | -8.159854698  | -4.864872659 |



|      |               |               |               |
|------|---------------|---------------|---------------|
| H209 | -1.799260643  | -11.071404836 | -0.795271389  |
| H210 | -2.426672388  | -3.593120006  | 1.774822224   |
| H211 | -1.844886750  | -3.510920521  | 4.792274517   |
| H212 | -2.079896749  | -8.087860355  | -2.807013995  |
| H213 | -5.004109940  | -8.494745213  | -2.612815224  |
| H214 | -0.401665135  | -9.460795973  | -2.833228726  |
| H215 | 0.819920411   | -4.884121858  | 3.663765489   |
| H216 | -0.525194220  | -8.304219665  | -0.565504486  |
| H217 | 0.024633880   | -10.930182637 | -2.224904982  |
| H218 | -5.332276758  | -4.718691074  | 3.698278544   |
| H219 | -2.306678055  | -2.053931408  | 2.630620327   |
| H220 | 2.400961497   | -8.956524229  | -0.118580745  |
| H221 | -0.569556871  | -3.142881744  | 3.634760722   |
| H222 | -4.220341998  | 3.646608591   | 0.298563820   |
| H223 | -1.999131829  | 2.495187902   | -0.770710396  |
| H224 | -7.004639060  | 2.718157432   | 4.011264137   |
| H225 | -6.340514473  | 0.040077688   | 2.873026348   |
| H226 | -7.700657988  | 2.934827121   | 0.084302084   |
| H227 | -10.741674625 | 6.433265948   | -2.342213043  |
| H228 | -8.180317681  | 6.202233627   | 0.624637771   |
| H229 | -10.133973882 | 4.206032089   | 0.446465501   |
| H230 | -8.325975908  | 4.624799811   | -2.016230115  |
| H231 | -13.801549260 | 3.559022094   | -2.926226839  |
| H232 | -5.012577827  | 3.026608064   | -2.076887827  |
| H233 | -5.963543134  | 1.719560545   | -1.365453361  |
| H234 | -12.957141263 | 5.902986589   | -3.502146165  |
| H235 | -9.750839879  | 2.903292326   | -0.673839653  |
| H236 | -6.078191654  | 1.456656616   | 0.996944643   |
| H237 | -5.511108607  | 1.832881291   | 4.333669153   |
| H238 | -9.624819130  | -0.205957221  | 1.672722033   |
| H239 | -2.555353887  | -1.390174176  | -2.334727543  |
| H240 | -9.365669336  | -1.056615848  | 3.206953455   |
| H241 | -0.857352074  | 0.327673004   | -1.670391353  |
| H242 | 7.869673846   | 5.442055614   | -5.014689168  |
| H243 | 6.450424291   | 4.871888761   | -4.438461674  |
| H244 | -0.868758555  | 1.929253568   | -5.943144256  |
| H245 | -2.972637422  | 2.692571440   | -4.091210514  |
| H246 | -1.709190983  | 4.270790608   | -7.005230209  |
| H247 | -5.272760684  | -0.424607377  | -2.877330541  |
| H248 | -6.858310184  | -1.842778369  | -2.429857362  |
| H249 | -6.594754355  | 0.000180153   | -3.665589568  |
| H250 | -5.837127183  | -3.603385045  | -1.230395135  |
| H251 | -7.361459723  | -3.722443966  | -0.315962148  |
| H252 | -4.906769134  | 3.958413083   | -10.539218833 |
| H253 | -6.563237054  | 4.506421653   | -10.915177605 |
| H254 | -4.674340978  | 2.163582597   | -9.094823113  |
| H255 | -5.966997352  | 1.634009916   | -8.040039476  |
| H256 | -6.232604703  | -1.655758473  | -9.142898944  |
| H257 | -4.081241505  | -3.252875994  | -5.369691767  |
| H258 | -10.124508123 | 2.160822734   | -4.847103844  |
| H259 | -6.091312886  | 5.073811399   | -4.896329949  |
| H260 | -7.062048369  | 0.006006963   | -6.156925661  |
| H261 | -0.849667843  | -0.685979549  | -6.263338164  |
| H262 | -0.474777874  | 0.907261551   | -8.012000407  |
| H263 | -2.924059005  | -0.937144621  | -4.824934249  |
| H264 | -7.664563145  | -2.286444595  | 2.232407551   |
| H265 | -0.589647418  | 1.540729261   | -11.156595127 |
| H266 | -5.423344267  | -3.808665657  | 1.249822995   |
| H267 | -1.612648498  | -1.655252263  | -7.527165950  |
| H268 | -5.839107201  | 2.638321160   | -4.606184510  |
| H269 | -8.659545723  | 0.478368817   | -4.350537185  |
| H270 | -1.100134448  | 3.141045630   | -10.584553914 |
| H271 | -5.110327004  | -2.758619541  | -8.438423649  |
| H272 | -7.629703345  | -0.486744700  | -7.706021750  |
| H273 | -3.816949278  | -5.242038478  | 3.240933655   |
| H274 | -4.116099932  | -2.790836205  | 4.202852443   |
| H275 | -10.370230423 | 4.593300639   | -5.271199470  |
| H276 | -5.358812132  | -1.388725110  | -0.290348710  |
| H277 | -3.335082331  | 0.088432809   | -7.898477155  |
| H278 | -3.717237765  | -2.881646577  | -7.050899859  |
| H279 | -1.966232098  | -2.373618526  | -5.147113069  |
| H280 | -5.409045603  | -1.215383587  | -5.176593158  |
| H281 | -2.819703217  | 6.808311358   | -6.130164930  |
| H282 | -4.408024418  | 4.555614299   | -7.926550858  |
| H283 | -5.176882344  | 6.353282590   | -10.099324274 |
| H284 | -1.673433199  | 6.506585247   | -7.455184622  |
| H285 | -6.422118224  | 5.920320660   | -6.964687338  |
| H286 | 4.867265572   | -8.573848580  | -4.149571295  |
| H287 | 5.564324555   | -8.467450352  | -2.521256377  |
| H288 | 8.934138049   | -5.692700625  | -1.375698611  |

|      |              |               |              |
|------|--------------|---------------|--------------|
| H289 | 6.007206019  | -10.637220268 | -3.395491549 |
| H290 | 4.825322876  | -10.850267499 | -2.282621626 |
| H291 | 3.185763754  | 2.662183472   | -6.241867490 |
| H292 | 2.083710723  | 5.257877298   | -7.549107964 |
| H293 | 1.296828387  | 1.642079565   | -9.800488413 |
| H294 | 1.576487327  | 3.400258636   | -5.970386900 |
| H295 | 2.858081961  | 4.991745862   | -8.962538946 |
| H296 | 3.302012564  | -3.387848455  | -7.566363388 |
| H297 | 2.853879181  | 2.653158658   | -8.654988570 |
| H298 | 7.615894369  | 1.603733509   | 6.170598316  |
| H299 | 9.524919720  | -0.453762942  | 4.932534557  |
| H300 | 2.464358534  | -4.750945248  | -5.832782693 |
| H301 | 4.896013038  | 3.664386000   | 0.167668750  |
| H302 | -0.702615398 | -6.249462016  | -5.616278033 |
| H303 | -0.689248397 | -5.784733537  | 0.756406725  |
| H304 | -0.743810464 | -4.549953002  | -5.122854665 |
| H305 | 5.562186949  | 2.193456065   | 4.591310855  |
| H306 | 1.564999045  | -5.071487839  | -4.015150643 |
| H307 | 5.389469982  | 0.463999543   | 4.279039773  |
| H308 | 7.225824783  | -0.086854897  | 5.779166902  |
| H309 | 7.732842352  | 0.414199614   | 3.325549420  |
| H310 | 7.921013559  | 2.126246553   | 3.749548472  |
| H311 | -4.961878134 | -6.946653265  | -0.884755535 |
| H312 | 9.234847467  | 0.501237038   | 7.761711566  |
| H313 | 9.439480639  | -2.256512840  | 9.049934100  |
| H314 | 0.263716460  | -4.225425148  | -0.918190456 |
| H315 | 10.647043709 | 0.268660382   | 9.872866760  |
| H316 | 9.386740914  | -0.548674439  | 10.527459899 |
| H317 | 5.427914532  | 0.780598444   | 1.963463324  |
| H318 | -1.078341658 | -3.533757347  | -2.884846177 |
| H319 | -2.949449237 | -6.768818952  | 0.397104141  |
| H320 | 10.854767804 | -4.829789606  | 4.163707252  |
| H321 | 8.896091626  | -6.237478566  | 1.638853584  |
| H322 | 9.287514862  | -2.971704282  | 3.970469243  |
| H323 | 10.390807876 | -6.274721447  | 4.477715184  |
| H324 | 3.073426761  | -6.285378379  | -8.467376408 |
| H325 | 7.871666889  | -1.694828132  | 1.463261687  |
| H326 | 5.232951319  | -2.490062447  | 5.349320204  |
| H327 | 3.400971428  | -6.934677964  | -3.568009802 |
| H328 | 6.420114053  | -4.711073469  | 5.642025726  |
| H329 | 5.030670482  | -8.995183198  | 0.366655432  |
| H330 | 3.886508532  | -6.712596314  | 0.455686340  |
| H331 | 11.165209221 | -1.879950054  | 9.089506851  |
| H332 | 5.549483404  | 2.059965779   | 0.039923341  |
| H333 | 10.013292594 | -0.728221189  | 1.896710161  |
| H334 | 7.836071787  | -0.639117975  | 0.323794158  |
| H335 | 10.961482306 | 0.596009621   | 3.630171607  |
| H336 | 4.659084532  | 3.902714446   | 3.607182063  |
| H337 | 7.110774353  | -8.511845225  | 6.226963300  |
| H338 | 6.455915342  | -6.647788275  | 3.261880744  |
| H339 | 7.802250153  | -5.557166345  | 3.653719190  |
| H340 | 5.068641000  | -5.725754085  | 5.057247914  |
| H341 | 1.879562711  | -6.040636133  | -1.922258694 |
| H342 | -3.336078283 | -4.557439959  | -3.276503092 |
| H343 | -5.271900965 | -5.935503789  | -2.317448929 |
| H344 | 4.317344438  | -2.220083016  | 3.829552317  |
| H345 | 10.716818690 | -1.617817838  | 2.962440083  |
| H346 | 10.467882163 | -2.667950484  | 4.923525772  |
| H347 | 5.095580305  | 4.811664280   | 2.207722106  |
| H348 | 7.588884280  | -8.786451027  | 0.430594561  |
| H349 | 8.196119869  | -4.803678793  | 0.884204598  |
| H350 | 1.233203729  | -7.692767066  | -1.678344839 |
| H351 | 1.850718795  | -3.735275300  | -8.538796982 |
| H352 | 7.287960144  | 4.991299294   | -0.899879944 |
| H353 | 7.057160761  | 3.566843628   | -1.940680079 |
| H354 | 10.506193263 | -7.427415599  | -1.425684350 |
| H355 | 10.478729505 | -7.641604209  | 0.196733630  |
| H356 | 12.669983499 | -4.069956090  | 2.133301384  |
| H357 | 10.810648438 | -5.320527927  | 1.773025792  |
| H358 | 13.471299146 | -5.390561574  | -0.151531332 |
| H359 | 12.028458578 | -2.910196060  | 0.947865353  |
| H360 | 9.566805464  | 3.982567749   | -3.068064766 |
| H361 | -7.775807807 | 8.845185213   | -7.490658052 |
| H362 | 12.123366293 | 3.131720619   | 4.767560717  |
| H363 | 10.574925304 | 3.263616947   | 2.449508037  |
| H364 | -9.204535971 | 6.168673774   | -7.475228356 |
| H365 | -7.604873392 | 7.072994570   | -5.000054413 |
| H366 | -9.363692977 | 6.864309726   | -5.088298888 |
| H367 | 0.044622263  | -0.498793882  | 0.194361473  |
| H368 | 2.220385996  | -1.705044482  | 1.592986660  |

|       |               |               |              |
|-------|---------------|---------------|--------------|
| H369  | 0.311513104   | -0.118044189  | -2.482949367 |
| Mo370 | 5.217850485   | -3.688430861  | 0.801677061  |
| N371  | -3.561459065  | -4.861754098  | 7.065000665  |
| N372  | -6.204238833  | -2.238873753  | 7.179181856  |
| N373  | -5.650726001  | -0.108065490  | 8.972092935  |
| N374  | -2.844496756  | -0.049717549  | 9.023323101  |
| N375  | -2.282139826  | 0.811196345   | 6.372802101  |
| N376  | -3.475194166  | 3.405524365   | 6.529859330  |
| N377  | -1.853441571  | 4.666039428   | 8.542703038  |
| N378  | 0.899953010   | 4.277180117   | 7.741769741  |
| N379  | 1.250494545   | 4.467781051   | 4.974680406  |
| N380  | -0.568964492  | 6.315362431   | 3.384056065  |
| N381  | -0.517116445  | 8.226181731   | 5.466360424  |
| N382  | 9.811436682   | -0.272379397  | 9.641054354  |
| N383  | 9.534915700   | -0.084539048  | 6.974804722  |
| N384  | 5.467395421   | 1.615282348   | 2.564211553  |
| N385  | 5.156676360   | 3.929552538   | 2.707970310  |
| N386  | 5.371409727   | 2.894071435   | 0.631858029  |
| N387  | 11.055086431  | 1.429010428   | 4.253094788  |
| N388  | -4.566741249  | -4.559840651  | 3.038777069  |
| N389  | 0.057539553   | -5.552391809  | 3.539752864  |
| N390  | -5.510521953  | -2.783718104  | 1.282039424  |
| N391  | -7.897916717  | -1.405926368  | 1.780415870  |
| N392  | -6.933927694  | 0.830980255   | 3.156752960  |
| N393  | -5.604236521  | 2.344032328   | 1.183400747  |
| N394  | -4.033758001  | 0.112150308   | -1.868640003 |
| N395  | -1.880177641  | 0.482668011   | -1.538810759 |
| N396  | -7.478055673  | 3.877759936   | -0.227170255 |
| N397  | -12.020623749 | 3.421209595   | -1.722255236 |
| N398  | -12.475484009 | 5.257391479   | -2.882245604 |
| N399  | 7.464377585   | 4.828301560   | -4.303646626 |
| N400  | 2.760359737   | 4.637938613   | -8.006501107 |
| N401  | 0.560331234   | 2.316012891   | -9.608395011 |
| N402  | -1.464239473  | 0.871492062   | -8.306187823 |
| N403  | -5.111636799  | -1.609386375  | -6.096891715 |
| N404  | -5.619981661  | -1.884989277  | -8.366713987 |
| N405  | -6.839145066  | -0.397287500  | -7.071888662 |
| N406  | -1.861964921  | 2.158467418   | -5.766638170 |
| N407  | -2.471355600  | 4.794664594   | -6.563703487 |
| N408  | -4.600746354  | 5.481623615   | -8.310877855 |
| N409  | -5.621367503  | 2.306270900   | -8.724042749 |
| N410  | -7.114251420  | 6.356428784   | -7.569119171 |
| N411  | 5.018768944   | -10.454604225 | -3.207555926 |
| N412  | 2.868241773   | -7.567474801  | -2.960174161 |
| N413  | 0.795777851   | -5.714239557  | -4.291779501 |
| N414  | 1.933166283   | -4.734651556  | -6.712484652 |
| N415  | -0.778248154  | -10.337463712 | -2.449449716 |
| N416  | -2.961689127  | -8.458208854  | -2.437412705 |
| N417  | 9.896141337   | -7.378086317  | -0.604444751 |
| N418  | 5.890657797   | -5.940436569  | 0.518703638  |
| N419  | 5.531556506   | -8.111350286  | 0.402571537  |
| N420  | 11.175911885  | -4.863415199  | 0.936892981  |
| N421  | 2.639718220   | 0.259195947   | 0.341437998  |
| N422  | 2.654193585   | 1.373723995   | 0.502395414  |
| O423  | -3.949248933  | -2.000380611  | 6.971435494  |
| O424  | -5.485470544  | 1.290608644   | 7.179747105  |
| O425  | -2.923467087  | 2.084155681   | 9.846301752  |
| O426  | -0.344165641  | 1.694538274   | 7.175295329  |
| O427  | -1.895979144  | 4.084678746   | 5.049509768  |
| O428  | -2.172779568  | 6.593828795   | 7.369165731  |
| O429  | 1.384357555   | 6.234916006   | 8.841764475  |
| O430  | 3.525353926   | 4.166696316   | 5.180631900  |
| O431  | 1.526844396   | 6.876310569   | 2.680285794  |
| O432  | -0.146885578  | 9.784095605   | 3.855384734  |
| O433  | 1.811277852   | 10.658976952  | 6.692214563  |
| O434  | 10.632059460  | -2.085691100  | 6.583003885  |
| O435  | 10.266779735  | 2.543821048   | 6.102961352  |
| O436  | 12.471971985  | 3.900861013   | 2.046269925  |
| O437  | -4.781969201  | -0.982718139  | 2.497248525  |
| O438  | -2.163784275  | -6.034009513  | 3.583682303  |
| O439  | -7.367480746  | 0.053459263   | 0.112638514  |
| O440  | -7.448010273  | -2.418072508  | -1.868109722 |
| O441  | -9.052894396  | 1.711321305   | 3.275859820  |
| O442  | -5.042823953  | 3.935190230   | 2.728225037  |
| O443  | -5.831237786  | 5.362964321   | -0.737141464 |
| O444  | -8.758971259  | 7.046062457   | -1.140195063 |
| O445  | 10.002230587  | 5.670588769   | -2.004775071 |
| O446  | 1.412793075   | 5.957189845   | -2.637664212 |
| O447  | -0.101991987  | 4.078877299   | -8.323897685 |
| O448  | -3.019670964  | 1.639773874   | -9.816045933 |

|                   |                                     |              |               |              |
|-------------------|-------------------------------------|--------------|---------------|--------------|
|                   | O449                                | -4.038863599 | 1.489503137   | -5.969324203 |
|                   | O450                                | -3.577562447 | 5.114543703   | -4.578061995 |
|                   | O451                                | -0.135969735 | 4.405320637   | -4.557736733 |
|                   | O452                                | -3.777895515 | 7.604217676   | -8.540223963 |
|                   | O453                                | -7.740450184 | 6.700650003   | -9.734940849 |
|                   | O454                                | -7.659587037 | 3.335520100   | -8.823266673 |
|                   | O455                                | -9.796101358 | 8.706995041   | -7.224931284 |
|                   | O456                                | -7.785892721 | 0.886101922   | -4.507711767 |
|                   | O457                                | 2.997873080  | -9.424643084  | -1.607275085 |
|                   | O458                                | -0.347011616 | -7.604179878  | -3.680097636 |
|                   | O459                                | -0.125535248 | -4.792353902  | -7.712924934 |
|                   | O460                                | 4.195210120  | -4.947473284  | -9.523653259 |
|                   | O461                                | -3.965261246 | -9.910223384  | -0.990718869 |
|                   | O462                                | 0.808257603  | -8.717420685  | 2.503282069  |
|                   | O463                                | 2.257463792  | -8.592973373  | 0.809420588  |
|                   | O464                                | -4.820328906 | -6.463632615  | -4.711608452 |
|                   | O465                                | 11.102093975 | -4.445678165  | -1.289311941 |
|                   | O466                                | 14.349293471 | -3.547037608  | -0.123258705 |
|                   | O467                                | 2.306577976  | -3.691915325  | 4.565906573  |
|                   | O468                                | 3.463326243  | -4.052471645  | 6.433160053  |
|                   | O469                                | 8.760862610  | -7.311343594  | 5.199485075  |
|                   | O470                                | 6.623714197  | -7.878224331  | 5.658000127  |
|                   | O471                                | 7.010707055  | -3.200978196  | 2.074653837  |
|                   | O472                                | 7.597329743  | -2.809803888  | 4.217499209  |
|                   | O473                                | 4.839969616  | -4.512628424  | 2.697209979  |
|                   | O474                                | 10.827987638 | -0.770027317  | 2.456988491  |
|                   | O475                                | 8.317540844  | -0.872165159  | 1.142001446  |
|                   | O476                                | -6.001073665 | -0.765722840  | -3.506314574 |
|                   | O477                                | 11.161532246 | -5.771930933  | 4.139072285  |
|                   | O478                                | 10.285095532 | -3.037789118  | 4.020811649  |
|                   | S479                                | 1.383109043  | 1.041895218   | -6.511566256 |
|                   | S480                                | 1.014264785  | -1.879656774  | -4.137021035 |
|                   | S481                                | 2.927205599  | -4.014972038  | 0.159590724  |
|                   | S482                                | 2.296243778  | 1.170818883   | -2.864095307 |
|                   | S483                                | 0.526120571  | -1.645324499  | -0.357510706 |
|                   | S484                                | 3.741383739  | -4.471839694  | -3.743599736 |
|                   | S485                                | 4.652745110  | -1.418046963  | 1.342750993  |
|                   | S486                                | 4.371461733  | -0.903046480  | -4.941278746 |
|                   | S487                                | 6.297605001  | -3.316196284  | -1.291815668 |
|                   | S488                                | 5.971454838  | 0.449207782   | -1.600163522 |
| <b>25 (S=1/2)</b> | <b>bm1s2b6x2n2xnaconexdti.car_2</b> |              |               |              |
| Fe(139) 2.433     | C1                                  | -9.669234126 | 1.293826827   | 0.623680427  |
| Fe(140) -1.384    | C2                                  | -8.661332686 | 2.154436771   | 1.393540593  |
| Fe(141) 2.730     | C3                                  | -8.000865350 | 4.445237409   | 2.019812698  |
| Fe(142) -2.631    | C4                                  | -7.791615107 | 4.252866873   | 3.520403055  |
| Fe(143) 2.830     | C5                                  | -8.727023796 | 3.575942740   | 5.666596551  |
| Fe(144) -2.201    | C6                                  | -7.809602871 | 2.399644884   | 6.018233744  |
| Fe(145) -1.131    | C7                                  | -6.858776756 | 0.266798295   | 5.284749830  |
|                   | C8                                  | -5.405040380 | 0.634902840   | 4.974678183  |
|                   | C9                                  | -3.854223859 | 1.911101639   | 3.591520991  |
|                   | C10                                 | -3.246085561 | 2.800537196   | 4.686181903  |
|                   | C11                                 | -3.586642191 | 4.550569136   | 6.335188163  |
|                   | C12                                 | -3.357629188 | 3.826797278   | 7.668733249  |
|                   | C13                                 | -4.298494554 | 2.358051451   | 9.383794778  |
|                   | C14                                 | -3.473848026 | 1.072117395   | 9.521170508  |
|                   | C15                                 | -2.820358288 | -1.061595612  | 8.491188908  |
|                   | C16                                 | -1.562505251 | -1.268523742  | 7.645557382  |
|                   | C17                                 | -0.037718778 | -0.278427752  | 5.968577319  |
|                   | C18                                 | 1.032927850  | 0.734080886   | 6.409962673  |
|                   | C19                                 | -0.429738785 | -0.154444892  | 4.472662008  |
|                   | C20                                 | 0.809172382  | -0.091054492  | 3.571753488  |
|                   | C21                                 | -1.355835075 | -1.303795613  | 4.056174910  |
|                   | C22                                 | 1.633572642  | 3.091553548   | 6.767371877  |
|                   | C23                                 | 1.670293176  | 3.202323194   | 8.302569247  |
|                   | C24                                 | 1.344098365  | 4.441517354   | 6.070053156  |
|                   | C25                                 | 2.250272164  | 5.548498185   | 6.622710188  |
|                   | C26                                 | 1.527506892  | 4.312335825   | 4.552256970  |
|                   | C27                                 | 0.445364637  | 3.457290252   | 10.379501234 |
|                   | C28                                 | 1.144111395  | 2.320970711   | 11.098074631 |
|                   | C29                                 | -3.477717421 | -10.486350293 | 7.509111668  |
|                   | C30                                 | -2.284049741 | -10.270045582 | 6.575045755  |
|                   | C31                                 | -0.287338508 | -8.804734668  | 6.219033950  |
|                   | C32                                 | 0.923894023  | -9.220675487  | 7.075950199  |
|                   | C33                                 | -0.325217723 | -7.285863912  | 5.970282643  |
|                   | C34                                 | 0.903505409  | -6.739877371  | 5.238135472  |
|                   | C35                                 | 0.640908413  | -5.322152030  | 4.727531771  |
|                   | C36                                 | 2.441170843  | -3.684106034  | 4.136108144  |
|                   | C37                                 | 3.087968882  | -10.369480303 | 7.082964556  |
|                   | C38                                 | 4.334234621  | -9.556953671  | 6.801383455  |

|      |              |              |              |
|------|--------------|--------------|--------------|
| C39  | -5.382321586 | 1.952441837  | -1.097567092 |
| C40  | -4.550892344 | 3.241019597  | -1.202341162 |
| C41  | -4.434410798 | 0.743241902  | -0.969963293 |
| C42  | -5.044059593 | -0.535395447 | -0.359862689 |
| C43  | -5.823401710 | -1.441941231 | -1.308047391 |
| C44  | -3.607108265 | 4.876882502  | -2.800260981 |
| C45  | -3.956161890 | 6.199329538  | -2.111302141 |
| C46  | -3.555508076 | 4.991901136  | -4.344068353 |
| C47  | -5.692854409 | 7.515572573  | -0.985916817 |
| C48  | -5.229087200 | 7.505529349  | 0.478126428  |
| C49  | -4.197349143 | 6.179634807  | 2.278464548  |
| C50  | -2.667107884 | 6.171887877  | 2.364850903  |
| C51  | -0.506067392 | 5.814439756  | 1.283368709  |
| C52  | 0.058447948  | 7.230253677  | 1.494378506  |
| C53  | 0.106762212  | 5.305278437  | -0.035200019 |
| C54  | -0.322565237 | 3.953617635  | -0.511768577 |
| C55  | -0.506419638 | 2.769288024  | 0.171525758  |
| C56  | -0.868265959 | 2.451045052  | -1.984372729 |
| C57  | -0.079138029 | 9.557830981  | 0.719607970  |
| C58  | 0.145494519  | 10.089320548 | 2.134244119  |
| C59  | -1.130428848 | 10.419603034 | -0.014853775 |
| C60  | -0.659240948 | 11.744904073 | -0.540330427 |
| C61  | 0.329914090  | 12.598753701 | -0.092309671 |
| C62  | -0.677911187 | 13.450341320 | -1.872747903 |
| C63  | 7.825069965  | -4.401209976 | 4.023978584  |
| C64  | 7.746217959  | -5.899876985 | 4.246663758  |
| C65  | 6.383050899  | -3.907754900 | 3.737823646  |
| C66  | 6.320895968  | -2.409756414 | 3.557488638  |
| C67  | 6.210489494  | -1.542174541 | 4.660811721  |
| C68  | 6.399254889  | -1.838279364 | 2.274415047  |
| C69  | 6.184412160  | -0.153112249 | 4.493317602  |
| C70  | 6.381759878  | -0.455504696 | 2.092427208  |
| C71  | 6.281226493  | 0.386319964  | 3.204396541  |
| C72  | 8.768927477  | 0.459880041  | -2.579748121 |
| C73  | 8.634934396  | 1.802001866  | -3.310251060 |
| C74  | 7.420271646  | 0.060555622  | -1.959801643 |
| C75  | 8.448467846  | 2.925401981  | -5.491664506 |
| C76  | 7.049422931  | 3.544625257  | -5.530172443 |
| C77  | 4.656140231  | 3.276367518  | -5.004079040 |
| C78  | 4.410913123  | 3.989509429  | -3.658178897 |
| C79  | 3.663105992  | 2.127034844  | -5.254134350 |
| C80  | 2.169831204  | 2.472221179  | -5.218716723 |
| C81  | 1.630601164  | 3.326094403  | -6.380483969 |
| C82  | 2.210248282  | 5.726557583  | -6.756643333 |
| C83  | 4.688339663  | 4.005285032  | -1.235644139 |
| C84  | 5.669103345  | 5.143355683  | -0.893717247 |
| C85  | 4.721791833  | 2.984002524  | -0.092021226 |
| C86  | 8.006691224  | 5.864582651  | -0.987612508 |
| C87  | 8.421747984  | 7.147443670  | -1.701337027 |
| C88  | 7.978110518  | 8.751161726  | -3.511515786 |
| C89  | 7.468090505  | 10.107632930 | -2.982193873 |
| C90  | 7.564682767  | 8.548335117  | -4.986661920 |
| C91  | 6.051103395  | 8.433724741  | -5.131245664 |
| C92  | 5.876314518  | 11.246397292 | -1.494941521 |
| C93  | 6.823588294  | 12.121331085 | -0.682099382 |
| C94  | 4.658412709  | 10.846148961 | -0.621583760 |
| C95  | 3.616470485  | 10.081543081 | -1.404435114 |
| C96  | 2.691983750  | 10.763879284 | -2.211283983 |
| C97  | 3.574202700  | 8.677427773  | -1.384960024 |
| C98  | 1.755715817  | 10.070596085 | -2.981124109 |
| C99  | 2.658863874  | 7.965757997  | -2.166808500 |
| C100 | 1.755775154  | 8.674229542  | -2.958132724 |
| C101 | -0.840835948 | -7.514715533 | -7.614148400 |
| C102 | -1.574366909 | -6.226748038 | -7.274278039 |
| C103 | -1.351555752 | -3.990391838 | -6.217692162 |
| C104 | -0.824345229 | -2.778834581 | -6.992549032 |
| C105 | 1.100544452  | -1.299175395 | -7.326117734 |
| C106 | 2.552415655  | -1.453524496 | -7.769106978 |
| C107 | 4.696981612  | -2.609519461 | -7.526216641 |
| C108 | 5.106438267  | -3.755953177 | -8.421606313 |
| C109 | -5.208798235 | -2.714448432 | -8.464695355 |
| C110 | -5.282664617 | -1.184412147 | -8.408048009 |
| C111 | -5.418860552 | -3.294141599 | -7.042453880 |
| C112 | -5.855081162 | -4.770514160 | -7.103117925 |
| C113 | -5.756128563 | -5.444096468 | -5.749739165 |
| C114 | -4.110499334 | 0.928954071  | -8.016184474 |
| C115 | -2.952174351 | 1.539311188  | -8.782322672 |
| C116 | -4.225053270 | 1.386230494  | -6.540117449 |
| C117 | -3.360338131 | 0.583541226  | -5.598194059 |
| C118 | -1.978353116 | 0.817163900  | -5.484555715 |

|       |               |               |              |
|-------|---------------|---------------|--------------|
| C119  | -3.923747412  | -0.469573460  | -4.856673024 |
| C120  | -1.182760473  | 0.000877459   | -4.673963159 |
| C121  | -3.128399947  | -1.288721662  | -4.049946988 |
| C122  | -1.752245761  | -1.059247174  | -3.959805351 |
| C123  | 0.572199493   | -10.888185935 | -2.053848758 |
| C124  | 1.419145944   | -11.534459999 | -0.946107480 |
| C125  | -0.644802725  | -10.130082782 | -1.497887110 |
| C126  | -1.419668536  | -9.313170471  | -2.486777822 |
| C127  | -2.186075060  | -9.769507256  | -3.540826620 |
| C128  | -2.398535277  | -7.572137394  | -3.372280820 |
| C129  | 1.535499117   | -12.820700387 | 1.118559728  |
| C130  | 2.544315358   | -13.808166160 | 0.577643239  |
| C131  | -4.326919508  | -4.933659444  | 1.825047527  |
| C132  | -3.159709593  | -5.827558302  | 2.119614003  |
| C133  | -2.932826560  | -6.944296105  | 1.021039823  |
| C134  | -4.163762166  | -7.894738179  | 0.953622245  |
| C135  | -3.895689062  | -9.101524231  | 0.038252249  |
| C136  | -4.944810727  | -10.173843226 | 0.107207700  |
| C137  | -1.727635400  | -7.792428466  | 1.526136873  |
| C138  | 1.835244685   | -3.653747114  | -1.716422967 |
| Fe139 | 0.888947281   | -5.026649132  | -2.813931816 |
| Fe140 | 2.001794248   | -1.498888825  | -1.646741744 |
| Fe141 | 3.669098115   | -3.637926763  | -0.986238452 |
| Fe142 | 2.851516324   | -3.541658702  | -3.422022720 |
| Fe143 | 4.483630362   | -1.624723075  | -2.664094760 |
| Fe144 | 1.764539216   | -5.181447434  | -0.414098993 |
| Fe145 | -0.201280596  | -3.615875943  | -0.885393009 |
| H146  | -8.787936215  | -0.493260819  | 1.057109150  |
| H147  | -8.495139612  | 0.017814250   | -0.469837618 |
| H148  | -9.655713441  | 3.852806103   | 0.807375634  |
| H149  | -10.003857276 | 1.835546894   | -0.274159366 |
| H150  | -10.556582699 | 1.210481953   | 1.276369819  |
| H151  | -7.004639905  | 4.399305627   | 1.557215498  |
| H152  | -9.738509033  | 3.638223774   | 3.765710710  |
| H153  | -8.402148730  | 5.455023828   | 1.853968040  |
| H154  | -9.726116559  | 3.383707229   | 6.079956092  |
| H155  | -8.232868207  | 1.503181180   | 4.221169922  |
| H156  | -8.311654819  | 4.461258537   | 6.164631685  |
| H157  | -3.171790784  | 1.061470727   | 3.459061283  |
| H158  | -5.978527075  | 1.700115757   | 3.297996667  |
| H159  | -7.178122383  | -0.553627575  | 4.628010969  |
| H160  | -2.631264857  | 5.000741896   | 6.036932543  |
| H161  | -5.038625587  | 3.807913181   | 4.929776962  |
| H162  | -6.881199040  | -0.088570608  | 6.321034193  |
| H163  | -3.894929535  | 2.468145033   | 2.643590541  |
| H164  | -5.195130451  | 2.878601160   | 7.515926509  |
| H165  | -4.313967078  | 5.359014628   | 6.493599291  |
| H166  | -2.248054596  | -1.354636096  | 4.697387937  |
| H167  | -1.694273795  | -1.165404679  | 3.016993721  |
| H168  | -0.834446394  | -2.273700237  | 4.104944219  |
| H169  | -0.981903848  | 0.792324178   | 4.358487782  |
| H170  | -5.330714026  | 2.120734758   | 9.678863927  |
| H171  | 0.848177038   | 3.568776170   | 4.113243356  |
| H172  | -0.407541924  | 3.401690798   | 8.432393868  |
| H173  | 2.085211928   | 5.731237153   | 7.694276306  |
| H174  | 0.507183094   | 0.061506379   | 2.523584504  |
| H175  | 1.385191221   | -1.027055774  | 3.607444420  |
| H176  | 8.155955621   | -3.940927772  | 4.974454035  |
| H177  | 1.337632563   | 5.279666491   | 4.066442264  |
| H178  | 2.061948289   | 6.490219058   | 6.086895824  |
| H179  | 2.561801694   | 4.012369536   | 4.317473150  |
| H180  | 3.311169756   | 5.285233406   | 6.482934264  |
| H181  | 0.293528922   | 4.717448344   | 6.276429269  |
| H182  | 2.646512635   | 2.764528349   | 6.490895400  |
| H183  | -0.204351570  | 2.330937657   | 5.938173752  |
| H184  | 1.481860028   | 0.738036079   | 3.840650520  |
| H185  | 4.110562467   | 2.111695561   | -0.377894114 |
| H186  | 4.261322946   | 3.462103888   | 0.786659823  |
| H187  | 6.113226644   | 2.346757504   | 1.132152423  |
| H188  | 6.145938598   | 2.228915507   | 3.806260618  |
| H189  | 6.410980301   | -0.029656913  | 1.089383915  |
| H190  | 6.436954221   | -2.486621912  | 1.395670596  |
| H191  | 6.134036940   | -1.955376575  | 5.670309362  |
| H192  | -1.798893624  | 0.591814708   | 6.837327854  |
| H193  | -3.542807815  | -1.831408561  | 8.180193540  |
| H194  | -2.545727608  | -1.259131134  | 9.536057896  |
| H195  | -4.002878088  | 0.466425602   | 7.604174374  |
| H196  | -3.885634206  | 3.066941450   | 10.112195422 |
| H197  | 6.079063264   | 0.506502266   | 5.359293176  |
| H198  | 0.416958426   | -1.263480051  | 6.137047038  |

|      |              |               |              |
|------|--------------|---------------|--------------|
| H199 | 0.890363691  | 4.409384774   | 10.710717968 |
| H200 | -0.609043087 | 3.448520691   | 10.695815253 |
| H201 | 1.183998432  | 1.358021738   | 10.536338320 |
| H202 | 3.273371934  | -11.423352627 | 6.823492455  |
| H203 | -6.164408825 | -3.407804308  | -1.716979181 |
| H204 | -5.454915648 | -6.214162005  | 2.720829701  |
| H205 | -6.901890259 | -4.823218054  | -7.433434268 |
| H206 | -5.233104164 | -5.311376436  | -7.831073472 |
| H207 | -6.191941306 | -2.713499429  | -6.514584653 |
| H208 | -2.693723043 | 0.996879548   | -9.723185641 |
| H209 | -6.091963343 | -2.987852146  | -9.062574059 |
| H210 | -3.999022540 | 0.531268729   | -1.959471200 |
| H211 | -5.737356379 | -0.262124464  | 0.456488428  |
| H212 | -3.253832311 | -1.040260067  | -8.006669209 |
| H213 | -5.012148732 | 1.286276534   | -8.550342311 |
| H214 | -3.173962424 | -3.067809177  | -8.646858387 |
| H215 | -5.052094703 | -3.148665352  | -0.385643871 |
| H216 | -4.483256562 | -3.177813871  | -6.472873874 |
| H217 | -4.121607628 | -4.193880159  | -9.368075430 |
| H218 | -7.140802992 | 2.344336071   | -2.102518399 |
| H219 | -3.606643844 | 1.051206877   | -0.314971900 |
| H220 | -3.944393530 | -5.996035657  | -6.249735988 |
| H221 | -4.239105326 | -1.117971561  | 0.109741411  |
| H222 | -0.160613602 | 5.210817915   | 2.134728203  |
| H223 | -0.418016599 | 2.516564017   | 1.222986331  |
| H224 | -4.539351950 | 7.021097063   | 2.892997345  |
| H225 | -4.677201219 | 5.515247426   | 0.319780740  |
| H226 | -1.428392780 | 7.949844371   | 0.274923945  |
| H227 | 1.037212364  | 12.529137884  | 0.726758663  |
| H228 | -0.624220872 | 9.746891356   | 2.868604638  |
| H229 | -2.004653206 | 10.557466985  | 0.646477600  |
| H230 | 0.881679906  | 9.578556903   | 0.178623815  |
| H231 | -0.904756301 | 14.151502528  | -2.672297108 |
| H232 | 1.200297409  | 5.331494237   | 0.103786792  |
| H233 | -0.126143828 | 6.025178072   | -0.833926783 |
| H234 | 0.915440894  | 14.487051674  | -0.911940034 |
| H235 | -1.491722943 | 9.839862842   | -0.878819716 |
| H236 | -2.445153054 | 5.375664313   | 0.462930123  |
| H237 | -4.571495683 | 5.259833886   | 2.751235568  |
| H238 | -5.327067151 | 8.454173524   | -1.424757730 |
| H239 | -1.105961413 | 1.932405557   | -2.908525545 |
| H240 | -6.790772236 | 7.552155733   | -0.991371655 |
| H241 | -0.914337854 | 0.814531320   | -0.639511013 |
| H242 | 9.681490180  | -4.230441645  | 3.172926815  |
| H243 | 8.593075367  | -3.159496054  | 2.588145759  |
| H244 | 5.288836870  | 2.437440819   | -2.599195698 |
| H245 | 3.688637468  | 4.462462366   | -1.253941180 |
| H246 | 7.118858648  | 4.283354978   | -2.063242015 |
| H247 | -0.256520665 | 4.871239704   | -3.177972038 |
| H248 | -1.783074023 | 5.827309127   | -4.490569530 |
| H249 | 0.189402395  | 6.360763038   | -3.569870400 |
| H250 | 0.191442197  | 8.545394649   | -4.110836734 |
| H251 | -3.246665251 | 3.999315329   | -4.726002182 |
| H252 | -4.566812153 | 5.197616395   | -4.730859681 |
| H253 | 8.079361122  | 7.655929329   | -5.370560814 |
| H254 | 7.903960068  | 9.424217876   | -5.554633833 |
| H255 | 6.147697168  | 6.341074692   | -5.389271572 |
| H256 | 4.558127863  | 7.035136771   | -5.206053645 |
| H257 | 3.280138732  | 6.259873698   | -8.416509452 |
| H258 | 0.598181898  | 3.027857859   | -6.617698335 |
| H259 | 1.031011090  | 10.610904410  | -3.595563192 |
| H260 | 4.259628010  | 8.110992869   | -0.748781280 |
| H261 | 1.815046183  | 7.187326398   | -5.355683328 |
| H262 | 3.843093085  | 1.336043868   | -4.509260684 |
| H263 | 6.222513274  | 1.844603296   | -4.699242913 |
| H264 | 1.889759915  | 2.934982446   | -4.259801566 |
| H265 | -5.928721031 | 5.642783355   | -2.003714777 |
| H266 | 8.733343969  | 2.678237910   | -6.523796162 |
| H267 | -5.013719606 | 3.224972131   | -3.143212539 |
| H268 | 3.909033743  | 1.687603249   | -6.235381158 |
| H269 | 2.671906968  | 6.874872296   | -2.182714443 |
| H270 | 9.122563936  | 3.716575995   | -5.136067259 |
| H271 | 2.559420915  | 4.694180080   | -8.501634583 |
| H272 | 2.395571727  | 7.756260674   | -6.878793007 |
| H273 | -6.513449997 | 0.829677317   | -2.381101279 |
| H274 | -5.923908632 | 2.047177021   | -0.136489478 |
| H275 | 2.693696559  | 11.856005999  | -2.236941891 |
| H276 | -2.594300946 | 4.642358697   | -2.441380506 |
| H277 | 4.542949144  | 4.057759200   | -5.766883916 |
| H278 | 2.226765528  | 3.149015405   | -7.284473917 |

|      |              |               |              |
|------|--------------|---------------|--------------|
| H279 | 1.638990438  | 1.509267362   | -5.246681649 |
| H280 | 1.042956766  | 5.038483103   | -5.241607998 |
| H281 | 7.789002978  | 6.142491400   | 0.054854739  |
| H282 | 6.830230320  | 7.001277739   | -2.990686178 |
| H283 | 9.074770640  | 8.824246078   | -3.467261436 |
| H284 | 8.887814070  | 5.207834671   | -0.983678784 |
| H285 | 6.228115416  | 9.139893260   | -1.685359928 |
| H286 | 0.209976664  | -7.300715562  | -7.859301417 |
| H287 | -0.835934938 | -8.108739298  | -6.676976264 |
| H288 | 1.240511408  | -10.168802087 | -2.548421316 |
| H289 | -1.214723903 | -9.167828107  | -8.753151957 |
| H290 | -2.504131132 | -8.170481428  | -8.576854349 |
| H291 | 7.551531928  | -0.908650426  | -1.463086958 |
| H292 | 9.603755692  | 1.326044081   | -0.938201247 |
| H293 | 8.595071755  | 0.826556482   | -5.114426043 |
| H294 | 7.116366301  | 0.810831499   | -1.214693813 |
| H295 | 10.708343763 | 0.669354382   | -1.943826604 |
| H296 | 5.230156487  | -2.673188568  | -6.563624377 |
| H297 | 9.060773048  | -0.319588780  | -3.300680084 |
| H298 | -0.457472411 | -6.770539434  | 6.936393845  |
| H299 | -0.257602339 | -9.324048413  | 5.252922167  |
| H300 | 2.853827078  | -3.142525525  | -6.607080089 |
| H301 | 3.881691337  | -2.485312081  | 3.332885668  |
| H302 | 0.510937210  | -1.018515361  | -8.207025848 |
| H303 | -3.578472208 | -2.110030777  | -3.488201157 |
| H304 | 1.094157352  | -0.430942324  | -6.647009079 |
| H305 | 0.441551128  | -4.626650339  | 5.554549824  |
| H306 | 0.901189045  | -2.924110095  | -5.907400029 |
| H307 | -0.257949879 | -5.321062039  | 4.090011430  |
| H308 | -1.227142146 | -7.092658933  | 5.366700275  |
| H309 | 1.145339183  | -7.371897848  | 4.369184832  |
| H310 | 1.786586558  | -6.736356190  | 5.898172504  |
| H311 | -5.278786155 | 1.287407554   | -6.242511056 |
| H312 | -1.782876729 | -8.751054852  | 7.769766518  |
| H313 | -4.368959356 | -10.196524788 | 6.932150141  |
| H314 | -1.130180526 | -1.708810165  | -3.341888124 |
| H315 | -2.953006593 | -10.208968298 | 9.481811824  |
| H316 | -4.358489482 | -9.473560489  | 9.070089334  |
| H317 | 1.794901357  | -5.174456082  | 2.953544405  |
| H318 | -0.107475402 | 0.176787604   | -4.595958898 |
| H319 | -5.000588991 | -0.649004699  | -4.913095818 |
| H320 | -1.841664069 | -12.190619197 | 2.069384298  |
| H321 | -1.335266753 | -10.864238282 | -1.045826591 |
| H322 | -1.189512522 | -9.962798398  | 2.812312458  |
| H323 | -3.055550166 | -12.397649691 | 1.134386663  |
| H324 | 4.291247652  | -4.173340727  | -9.060274187 |
| H325 | 0.930085298  | -7.968715940  | 1.591508272  |
| H326 | -3.268791899 | -6.311509940  | 3.102049896  |
| H327 | 0.156822803  | -5.431606487  | -6.499628912 |
| H328 | -4.390783518 | -8.252419862  | 1.970338844  |
| H329 | -3.453973232 | -8.647135406  | -4.854622023 |
| H330 | -2.741732629 | -6.564884294  | -3.579778606 |
| H331 | -3.549230730 | -11.574493611 | 7.676254641  |
| H332 | 3.174864598  | -3.613556631  | 2.215158124  |
| H333 | 1.920040731  | -9.582745069  | 3.060089028  |
| H334 | 2.406372081  | -7.494059784  | 1.496770992  |
| H335 | 1.817975964  | -10.044722936 | 5.377197001  |
| H336 | 2.147087518  | -3.616497718  | 6.179692145  |
| H337 | -6.787839024 | -10.498373733 | -0.175964799 |
| H338 | -3.816282146 | -8.744729908  | -0.998949001 |
| H339 | -2.946252405 | -9.580771522  | 0.301649286  |
| H340 | -5.029713325 | -7.334019792  | 0.572846950  |
| H341 | -1.073673435 | -3.923242593  | -5.153947308 |
| H342 | -1.526266731 | 1.634702045   | -6.051916208 |
| H343 | -3.963207044 | 2.455136204   | -6.514730542 |
| H344 | -2.254538347 | -5.206439591  | 2.114444041  |
| H345 | 0.828983138  | -10.640784357 | 3.397408367  |
| H346 | -1.313514535 | -10.979794239 | 3.983583852  |
| H347 | 2.936749337  | -2.231358013  | 5.512816923  |
| H348 | -2.338149012 | -10.768825868 | -3.931964008 |
| H349 | -0.313743447 | -9.469701662  | -0.686948724 |
| H350 | -2.440808522 | -4.006179797  | -6.301904545 |
| H351 | 5.013189137  | -1.676265417  | -8.023670136 |
| H352 | 5.751380133  | -4.219339149  | 4.583805511  |
| H353 | 6.005271787  | -4.409579574  | 2.832438986  |
| H354 | 1.015771446  | -12.330895662 | -3.445195593 |
| H355 | -0.351485745 | -12.644583825 | -2.602871735 |
| H356 | 0.829167621  | -13.386885754 | 1.746784548  |
| H357 | -0.247113188 | -12.157033098 | 0.159199359  |
| H358 | 2.298135259  | -14.238539142 | -0.422604154 |



|       |              |               |              |
|-------|--------------|---------------|--------------|
| H359  | 2.043704743  | -12.087418814 | 1.765828929  |
| H360  | 7.745999899  | -6.504174337  | 3.308233591  |
| H361  | 7.708238285  | 11.590029265  | -0.255962243 |
| H362  | 2.905877683  | -10.310850230 | 8.170552429  |
| H363  | 4.152827078  | -8.495473210  | 6.504424492  |
| H364  | 5.524870333  | 11.848946410  | -2.348185856 |
| H365  | 5.010459562  | 10.245226948  | 0.231482634  |
| H366  | 4.230131512  | 11.774872615  | -0.215857463 |
| H367  | 0.218463682  | -1.355346705  | 0.680726708  |
| H368  | -1.541738849 | -3.402695596  | -0.222282924 |
| Mo369 | -0.688097230 | -6.237751578  | -0.883839811 |
| N370  | -9.220803265 | -0.036900070  | 0.250062554  |
| N371  | -8.915351987 | 3.492233133   | 1.404377310  |
| N372  | -8.854214907 | 3.810243949   | 4.237448681  |
| N373  | -7.785654792 | 1.376249043   | 5.128337628  |
| N374  | -5.198533972 | 1.445963333   | 3.907130464  |
| N375  | -4.084141913 | 3.686519803   | 5.276869306  |
| N376  | -4.337561408 | 2.972790852   | 8.065748259  |
| N377  | -3.436476391 | 0.252996454   | 8.431081373  |
| N378  | -1.194661188 | -0.227499472  | 6.854299928  |
| N379  | 0.696955966  | 2.053059642   | 6.333452469  |
| N380  | 0.474202553  | 3.301892397   | 8.938797330  |
| N381  | -3.416746278 | -9.684645688  | 8.736924748  |
| N382  | -1.507292177 | -9.219838956  | 6.900580221  |
| N383  | 1.743177463  | -4.805510905  | 3.909598390  |
| N384  | 2.445644788  | -3.105723554  | 5.356191554  |
| N385  | 3.094228952  | -3.096864947  | 3.119742576  |
| N386  | 1.907318551  | -9.869612333  | 6.403307806  |
| N387  | -6.271751138 | 1.827346197   | -2.259567910 |
| N388  | -5.618277955 | -2.764150574  | -1.148484949 |
| N389  | -4.496094369 | 3.776151011   | -2.443053505 |
| N390  | -5.266874347 | 6.382644765   | -1.784857329 |
| N391  | -4.772204262 | 6.314595672   | 0.954157836  |
| N392  | -1.966848650 | 5.826568630   | 1.244211526  |
| N393  | -0.553890352 | 3.739769797   | -1.861649498 |
| N394  | -0.864734786 | 1.837392610   | -0.776840163 |
| N395  | -0.597458658 | 8.201200987   | 0.807663782  |
| N396  | -1.281824653 | 12.289400108  | -1.652799460 |
| N397  | 0.304455352  | 13.675796446  | -0.954515917 |
| N398  | 8.704861003  | -4.133638286  | 2.883674391  |
| N399  | 9.788943430  | 0.505877253   | -1.523947806 |
| N400  | 8.603331828  | 1.741053971   | -4.670569739 |
| N401  | 6.023795605  | 2.769314083   | -5.115215342 |
| N402  | 1.605073115  | 4.761423899   | -6.074620169 |
| N403  | 2.831552493  | 5.488784781   | -7.932846838 |
| N404  | 2.291617851  | 6.974941943   | -6.236276209 |
| N405  | 4.919505005  | 3.395617459   | -2.542240389 |
| N406  | 6.876905679  | 5.123538926   | -1.529377729 |
| N407  | 7.598113452  | 7.604779726   | -2.691017180 |
| N408  | 5.569215246  | 7.164781312   | -5.188521720 |
| N409  | 6.555577808  | 10.056047895  | -1.981622403 |
| N410  | -1.493172729 | -8.184723705  | -8.742933705 |
| N411  | -0.822928313 | -5.240462897  | -6.751159133 |
| N412  | 0.449741917  | -2.431844120  | -6.697277704 |
| N413  | 3.261756511  | -2.519731947  | -7.312411803 |
| N414  | -4.032080630 | -3.189383779  | -9.199154068 |
| N415  | -4.113364422 | -0.515832689  | -8.198729101 |
| N416  | 0.174143320  | -11.892406442 | -3.059775995 |
| N417  | -1.561744377 | -7.927814634  | -2.400070837 |
| N418  | -2.792257031 | -8.658297067  | -4.083986555 |
| N419  | 0.767498108  | -12.185265418 | 0.059703134  |
| N420  | 2.118124093  | 1.459854823   | -1.732477603 |
| N421  | 2.049439036  | 0.334881302   | -1.681471109 |
| O422  | -7.703108384 | 1.664215968   | 2.020523534  |
| O423  | -6.697031431 | 4.512663599   | 4.045787433  |
| O424  | -7.162338112 | 2.396322742   | 7.078581749  |
| O425  | -4.472160092 | 0.220156737   | 5.681992254  |
| O426  | -2.048412668 | 2.709187607   | 5.001588449  |
| O427  | -2.345610108 | 4.047141217   | 8.354671406  |
| O428  | -2.928609470 | 0.804886857   | 10.600898370 |
| O429  | -0.957718157 | -2.349800393  | 7.704667396  |
| O430  | 2.143115512  | 0.349690381   | 6.810783700  |
| O431  | 2.741409230  | 3.201534553   | 8.931614334  |
| O432  | 1.581809143  | 2.416596445   | 12.234756490 |
| O433  | -2.118189358 | -11.032617789 | 5.599058066  |
| O434  | 0.960979638  | -8.970798490  | 8.294073790  |
| O435  | 5.465865490  | -10.003293073 | 6.902579880  |
| O436  | -3.992958527 | 3.748910141   | -0.204539733 |
| O437  | -6.617603542 | -0.999671742  | -2.169530516 |
| O438  | -3.081550084 | 7.034639646   | -1.845071720 |

|  |                 |              |                                      |              |
|--|-----------------|--------------|--------------------------------------|--------------|
|  | O439            | -2.706965804 | 6.020855083                          | -4.805208775 |
|  | O440            | -5.322065227 | 8.537636195                          | 1.157406533  |
|  | O441            | -2.108455465 | 6.481422352                          | 3.425481499  |
|  | O442            | 1.080477534  | 7.446564888                          | 2.156847497  |
|  | O443            | 1.031072112  | 10.867311622                         | 2.451391696  |
|  | O444            | 7.668363081  | -6.428282602                         | 5.347031955  |
|  | O445            | 6.261415850  | 1.746126659                          | 2.967358996  |
|  | O446            | 8.566842647  | 2.884556599                          | -2.699024669 |
|  | O447            | 6.917056576  | 4.707909356                          | -5.963648331 |
|  | O448            | 3.782026962  | 5.058810621                          | -3.625300870 |
|  | O449            | 5.360111624  | 5.992076708                          | -0.046003989 |
|  | O450            | 6.073103311  | 2.603177286                          | 0.188259033  |
|  | O451            | 9.453457483  | 7.737804203                          | -1.355835223 |
|  | O452            | 7.895989830  | 11.168104410                         | -3.458083433 |
|  | O453            | 5.316826232  | 9.433982272                          | -5.105906194 |
|  | O454            | 6.623713509  | 13.307558225                         | -0.475535614 |
|  | O455            | 0.867000326  | 7.937848632                          | -3.752583905 |
|  | O456            | -2.815814982 | -6.141064703                         | -7.454611219 |
|  | O457            | -1.524808724 | -2.180748182                         | -7.836568274 |
|  | O458            | 3.040310575  | -0.571781780                         | -8.495533291 |
|  | O459            | 6.246941619  | -4.189041802                         | -8.473783216 |
|  | O460            | -6.369073808 | -0.592835623                         | -8.529500921 |
|  | O461            | -6.655816362 | -5.441401906                         | -4.918561768 |
|  | O462            | -4.576745659 | -6.046573223                         | -5.468505888 |
|  | O463            | -2.358664315 | 2.556841437                          | -8.455191653 |
|  | O464            | 2.662982287  | -11.542401848                        | -1.001304252 |
|  | O465            | 3.527059636  | -14.179678545                        | 1.203567126  |
|  | O466            | -4.268231395 | -3.868850792                         | 1.226086156  |
|  | O467            | -5.555726850 | -5.358390783                         | 2.261631642  |
|  | O468            | -4.749560054 | -11.345059320                        | 0.425521674  |
|  | O469            | -6.182189994 | -9.729133961                         | -0.239103119 |
|  | O470            | -0.700332267 | -7.818540526                         | 0.747424797  |
|  | O471            | -1.824168600 | -8.425722087                         | 2.605885428  |
|  | O472            | -2.670824538 | -6.377869360                         | -0.207586698 |
|  | O473            | 1.763908968  | -10.384377194                        | 3.620396271  |
|  | O474            | 1.800368592  | -8.014244285                         | 2.062168211  |
|  | O475            | -0.152207056 | 5.521417093                          | -3.950007059 |
|  | O476            | -2.268876405 | -12.865418054                        | 1.483219682  |
|  | O477            | -0.921346632 | -10.893669316                        | 3.076993473  |
|  | S478            | 6.081723986  | -0.084098264                         | -3.231538439 |
|  | S479            | 2.632947779  | -1.358052685                         | -3.892245197 |
|  | S480            | -1.314237452 | -4.590745863                         | -2.527538435 |
|  | S481            | 3.927426031  | -1.446060835                         | -0.442657015 |
|  | S482            | -0.115862040 | -1.377903702                         | -0.641051736 |
|  | S483            | 1.826487971  | -4.908925208                         | -4.846514846 |
|  | S484            | 0.026873369  | -4.813502463                         | 0.936606022  |
|  | S485            | 4.982536852  | -3.856107262                         | -2.863018394 |
|  | S486            | 1.413443765  | -6.950991062                         | -1.727606168 |
|  | S487            | 3.701690634  | -5.147921333                         | 0.658116516  |
|  | <b>26 (S=1)</b> |              | <b>bm1s2b6x262n2xnconexdte.car_2</b> |              |
|  | Fe(139)         | 2.444        | C1                                   | -1.796617186 |
|  | Fe(140)         | -0.017       | C2                                   | -2.896675110 |
|  | Fe(141)         | 2.577        | C3                                   | -5.177233168 |
|  | Fe(142)         | -2.487       | C4                                   | -5.717382706 |
|  | Fe(143)         | 1.904        | C5                                   | -6.169257886 |
|  | Fe(144)         | -2.299       | C6                                   | -5.289241342 |
|  | Fe(145)         | -0.257       | C7                                   | -3.032889500 |
|  |                 |              | C8                                   | -3.168292579 |
|  |                 |              | C9                                   | -3.544784017 |
|  |                 |              | C10                                  | -4.833440669 |
|  |                 |              | C11                                  | -7.178099356 |
|  |                 |              | C12                                  | -7.192917052 |
|  |                 |              | C13                                  | -6.812150498 |
|  |                 |              | C14                                  | -5.720576078 |
|  |                 |              | C15                                  | -3.325629926 |
|  |                 |              | C16                                  | -2.694840940 |
|  |                 |              | C17                                  | -2.666264536 |
|  |                 |              | C18                                  | -3.733946296 |
|  |                 |              | C19                                  | -2.047854249 |
|  |                 |              | C20                                  | -1.593631916 |
|  |                 |              | C21                                  | -0.885185652 |
|  |                 |              | C22                                  | -5.945551989 |
|  |                 |              | C23                                  | -6.795771326 |
|  |                 |              | C24                                  | -6.783058428 |
|  |                 |              | C25                                  | -8.023400821 |
|  |                 |              | C26                                  | -5.924642894 |
|  |                 |              | C27                                  | -8.068334998 |
|  |                 |              | C28                                  | -7.462058424 |
|  |                 |              | C29                                  | 5.404735827  |
|  |                 |              |                                      | -7.829218564 |
|  |                 |              |                                      | -7.128378376 |
|  |                 |              |                                      | -6.206997484 |
|  |                 |              |                                      | -6.825930726 |
|  |                 |              |                                      | -8.853821931 |
|  |                 |              |                                      | -8.586843205 |
|  |                 |              |                                      | -8.072803352 |
|  |                 |              |                                      | 0.262854260  |
|  |                 |              |                                      | -4.290369371 |
|  |                 |              |                                      | -4.051880916 |
|  |                 |              |                                      | -4.619533341 |
|  |                 |              |                                      | -5.294921938 |
|  |                 |              |                                      | -7.352580468 |
|  |                 |              |                                      | -7.174594946 |
|  |                 |              |                                      | -6.822867821 |
|  |                 |              |                                      | -5.448808035 |
|  |                 |              |                                      | -3.069856514 |
|  |                 |              |                                      | -2.105846958 |
|  |                 |              |                                      | -2.611966719 |
|  |                 |              |                                      | -1.150913720 |
|  |                 |              |                                      | -3.524389857 |
|  |                 |              |                                      | -1.073258677 |
|  |                 |              |                                      | -1.766423777 |
|  |                 |              |                                      | -0.565873430 |
|  |                 |              |                                      | 0.201223960  |
|  |                 |              |                                      | 0.318402222  |
|  |                 |              |                                      | -3.717257011 |
|  |                 |              |                                      | -3.787338579 |
|  |                 |              |                                      | 7.366500866  |

|      |               |              |              |
|------|---------------|--------------|--------------|
| C30  | 5.725760060   | -8.291736255 | 7.281758433  |
| C31  | 4.749605275   | -6.029037527 | 7.686355822  |
| C32  | 4.779625569   | -5.603134234 | 9.166715749  |
| C33  | 3.541068985   | -5.423793519 | 6.947552077  |
| C34  | 3.530006524   | -3.892429389 | 6.945411535  |
| C35  | 2.488079507   | -3.342084169 | 5.972337069  |
| C36  | 1.548893285   | -1.024550115 | 5.832995427  |
| C37  | 5.860498868   | -4.171242916 | 10.828956923 |
| C38  | 5.157967558   | -2.855620493 | 11.098052979 |
| C39  | -1.278796039  | -3.316179464 | -4.680142912 |
| C40  | -2.351632926  | -2.215879788 | -4.738480843 |
| C41  | -0.272753178  | -2.956744675 | -3.564154341 |
| C42  | 0.581873121   | -4.113705192 | -3.001770905 |
| C43  | 1.830332251   | -4.481858530 | -3.794952531 |
| C44  | -2.953337219  | -0.085066091 | -5.848214815 |
| C45  | -4.457017189  | -0.299515142 | -6.043364347 |
| C46  | -2.327692572  | 0.783164917  | -6.969849911 |
| C47  | -6.216223087  | -1.817289132 | -6.829673666 |
| C48  | -6.930792499  | -2.203819432 | -5.526410850 |
| C49  | -6.691184082  | -2.689285105 | -3.129453098 |
| C50  | -6.637476866  | -1.504543117 | -2.157426365 |
| C51  | -5.718520385  | 0.701067988  | -1.596171970 |
| C52  | -7.052126571  | 1.471156354  | -1.657391250 |
| C53  | -4.649917335  | 1.699220904  | -2.073643230 |
| C54  | -3.232641499  | 1.226701727  | -2.138469466 |
| C55  | -2.574926587  | 0.213649765  | -1.478430687 |
| C56  | -1.160497672  | 1.297142492  | -2.794004226 |
| C57  | -8.694598999  | 2.441629964  | -3.209879774 |
| C58  | -9.890188866  | 2.031460782  | -2.353422041 |
| C59  | -9.019912489  | 2.285600048  | -4.712251886 |
| C60  | -9.884364354  | 3.346785192  | -5.327050233 |
| C61  | -10.831391368 | 4.182524560  | -4.767879281 |
| C62  | -10.636584047 | 4.579757049  | -6.939124734 |
| C63  | 2.134612806   | 3.114666320  | 9.105897808  |
| C64  | 3.295602101   | 2.432037713  | 9.802889853  |
| C65  | 1.708840496   | 2.200204525  | 7.929093137  |
| C66  | 0.498341561   | 2.724141474  | 7.194568907  |
| C67  | -0.809029119  | 2.396563069  | 7.600952577  |
| C68  | 0.646962049   | 3.576058923  | 6.084359614  |
| C69  | -1.928033887  | 2.897773705  | 6.926212848  |
| C70  | -0.458882948  | 4.090514506  | 5.405558175  |
| C71  | -1.747038664  | 3.749870124  | 5.827488812  |
| C72  | 1.213437932   | 8.443312469  | 2.895294042  |
| C73  | 0.357205883   | 9.118012688  | 1.816216677  |
| C74  | 1.040844947   | 6.920516468  | 2.817707072  |
| C75  | 0.366447351   | 10.434059653 | -0.263357826 |
| C76  | -0.208875705  | 9.520885909  | -1.348721243 |
| C77  | -0.326276454  | 7.224179327  | -2.249921688 |
| C78  | -1.603839431  | 6.556540635  | -1.691495254 |
| C79  | 0.794124593   | 6.223790991  | -2.588360834 |
| C80  | 0.473507031   | 5.139164456  | -3.622201902 |
| C81  | 0.244551310   | 5.619750298  | -5.065034967 |
| C82  | -1.672784936  | 6.967395805  | -5.923400167 |
| C83  | -2.764588183  | 5.578939404  | 0.222391095  |
| C84  | -3.885405243  | 6.552775846  | 0.631017993  |
| C85  | -2.404590876  | 4.733657141  | 1.454360820  |
| C86  | -4.373934782  | 8.686082316  | 1.714499518  |
| C87  | -5.170864377  | 9.762496879  | 0.984629312  |
| C88  | -5.695814320  | 10.860864187 | -1.150021980 |
| C89  | -7.165295361  | 10.602093092 | -1.545313118 |
| C90  | -4.843877594  | 11.230069448 | -2.380305766 |
| C91  | -4.746361510  | 10.094524371 | -3.393988354 |
| C92  | -8.929314940  | 8.931493132  | -1.874824479 |
| C93  | -10.034109131 | 9.565712055  | -1.042078695 |
| C94  | -9.057151913  | 7.385447542  | -1.828630694 |
| C95  | -8.041275785  | 6.711242832  | -2.721497627 |
| C96  | -8.257585727  | 6.618995409  | -4.105146147 |
| C97  | -6.834182287  | 6.215493499  | -2.204617627 |
| C98  | -7.300431984  | 6.059441774  | -4.953205429 |
| C99  | -5.855682206  | 5.670095345  | -3.041393216 |
| C100 | -6.100862106  | 5.595697280  | -4.411601360 |
| C101 | 10.179322566  | 0.796142307  | -3.162805925 |
| C102 | 8.878994264   | 0.397980970  | -3.837686946 |
| C103 | 6.431271149   | 0.787579984  | -3.908716907 |
| C104 | 5.771432614   | 1.980163496  | -4.615987790 |
| C105 | 4.738739225   | 4.178004329  | -4.289643076 |
| C106 | 5.044838180   | 5.511961458  | -3.615147353 |
| C107 | 5.951478773   | 6.749438314  | -1.706192711 |
| C108 | 7.398758798   | 7.190878415  | -1.693877417 |
| C109 | 6.241878059   | -0.958072532 | -8.076098755 |

|       |              |              |              |
|-------|--------------|--------------|--------------|
| C110  | 4.885526477  | -0.557641846 | -8.670466049 |
| C111  | 6.014445876  | -1.969734669 | -6.926385395 |
| C112  | 7.290528991  | -2.780418603 | -6.630795802 |
| C113  | 7.169784385  | -3.525523733 | -5.318437900 |
| C114  | 2.887889719  | 0.842013063  | -8.488932697 |
| C115  | 2.749854265  | 2.349358912  | -8.579600550 |
| C116  | 1.764534043  | 0.133399853  | -7.691687643 |
| C117  | 2.024607622  | 0.208795751  | -6.211176305 |
| C118  | 1.774943582  | 1.389285673  | -5.490784851 |
| C119  | 2.670929209  | -0.854397570 | -5.560554695 |
| C120  | 2.244412682  | 1.529770124  | -4.182439502 |
| C121  | 3.139626745  | -0.714683904 | -4.250800480 |
| C122  | 2.959093279  | 0.495175532  | -3.576283178 |
| C123  | 10.431484804 | -1.771500416 | 2.961004073  |
| C124  | 10.544604459 | -1.872441740 | 4.491002442  |
| C125  | 9.560630841  | -2.877437223 | 2.343989388  |
| C126  | 9.254119501  | -2.738861709 | 0.883144078  |
| C127  | 10.122450401 | -2.919136945 | -0.174407222 |
| C128  | 8.076494744  | -2.584899923 | -0.952776568 |
| C129  | 10.768046079 | -3.220757177 | 6.500633091  |
| C130  | 11.918172974 | -2.398438175 | 7.036702857  |
| C131  | 3.287535600  | -6.045286762 | 0.744902701  |
| C132  | 3.953729382  | -5.417372818 | 1.935775651  |
| C133  | 5.455428114  | -5.004880001 | 1.670377019  |
| C134  | 6.289181081  | -6.247153456 | 1.241710044  |
| C135  | 7.788586115  | -5.921922217 | 1.137964502  |
| C136  | 8.671847810  | -7.127042005 | 0.987459066  |
| C137  | 6.030196078  | -4.538657307 | 3.042746949  |
| C138  | 4.066679285  | 1.196103537  | 1.233468158  |
| Fe139 | 5.687808551  | 0.579467978  | 0.316682039  |
| Fe140 | 2.036030112  | 1.445145040  | 0.920355542  |
| Fe141 | 3.945742618  | 2.452787047  | 2.783851762  |
| Fe142 | 4.443324880  | 2.807700251  | 0.240978267  |
| Fe143 | 2.631181297  | 4.356128535  | 1.261220760  |
| Fe144 | 4.958272040  | 0.147131969  | 2.740127640  |
| Fe145 | 3.377533071  | -0.821682496 | 0.891902122  |
| H146  | -0.416947713 | -7.829000989 | -4.081369576 |
| H147  | -0.126582332 | -6.691040046 | -5.222953735 |
| H148  | -4.130012414 | -7.136067355 | -6.422848711 |
| H149  | -1.847132220 | -7.512765281 | -6.636716144 |
| H150  | -2.049928387 | -8.904592220 | -5.576073333 |
| H151  | -4.874495303 | -5.180244070 | -4.559606198 |
| H152  | -5.357993534 | -8.720833043 | -4.230131769 |
| H153  | -6.000126986 | -6.149418203 | -5.535961859 |
| H154  | -6.184031992 | -9.935000281 | -2.431482197 |
| H155  | -3.654127854 | -8.336625537 | -2.225994879 |
| H156  | -7.187201908 | -8.534132140 | -1.981252442 |
| H157  | -2.714204431 | -3.925369064 | 0.271136018  |
| H158  | -3.286268285 | -5.956164425 | -1.692397193 |
| H159  | -2.011128909 | -8.242214437 | -0.569724115 |
| H160  | -7.409389147 | -3.557874230 | 0.930044920  |
| H161  | -5.878408503 | -5.357673261 | -0.766140696 |
| H162  | -3.198499186 | -8.708663949 | 0.672975479  |
| H163  | -3.569844816 | -3.696132834 | -1.273441478 |
| H164  | -6.371332705 | -7.024537626 | 1.361963294  |
| H165  | -7.972304977 | -5.064616084 | 0.163194999  |
| H166  | -1.208844406 | -4.568226333 | 2.589777181  |
| H167  | -0.455012201 | -3.187190529 | 1.754254512  |
| H168  | -0.078335775 | -3.494543502 | 3.459076126  |
| H169  | -2.835095998 | -2.693288621 | 2.350139277  |
| H170  | -6.816380937 | -8.413290276 | 3.135072705  |
| H171  | -5.051946075 | -0.219596999 | 2.193831438  |
| H172  | -7.071041948 | -3.467234728 | 4.606444554  |
| H173  | -8.697386312 | -0.424561674 | 4.579614018  |
| H174  | -1.210449889 | -0.829616646 | 2.202719076  |
| H175  | -0.775437086 | -1.021644431 | 3.903810728  |
| H176  | 1.292791703  | 3.154133117  | 9.823830359  |
| H177  | -6.524267717 | 0.675649371  | 1.740300703  |
| H178  | -8.589233133 | 0.569112711  | 3.108790945  |
| H179  | -5.561816901 | 1.199463490  | 3.144683895  |
| H180  | -7.733251056 | 1.070659254  | 4.587963214  |
| H181  | -7.120375858 | -1.445623617 | 2.926382996  |
| H182  | -5.499271493 | -0.208067957 | 5.214454898  |
| H183  | -4.916647579 | -2.369023633 | 3.325815992  |
| H184  | -2.409846671 | -0.467361111 | 3.458007622  |
| H185  | -1.510115559 | 4.130017051  | 1.226733100  |
| H186  | -3.247836410 | 4.050220641  | 1.639844668  |
| H187  | -2.440452595 | 5.084430570  | 3.387375124  |
| H188  | -3.646271742 | 3.912567725  | 5.453628876  |
| H189  | -0.319804945 | 4.721547174  | 4.527367528  |

|      |               |              |               |
|------|---------------|--------------|---------------|
| H190 | 1.646966517   | 3.811726269  | 5.713715702   |
| H191 | -0.962324788  | 1.733905499  | 8.456756851   |
| H192 | -3.905975375  | -4.651084420 | 3.711930070   |
| H193 | -2.527639709  | -7.477814004 | 4.536209018   |
| H194 | -3.639876665  | -7.210616152 | 5.895334225   |
| H195 | -4.288468773  | -6.837430231 | 3.020809807   |
| H196 | -7.765349435  | -7.127643424 | 3.919539628   |
| H197 | -2.936713084  | 2.620145687  | 7.243201554   |
| H198 | -1.877907783  | -3.089296142 | 5.226753059   |
| H199 | -9.069250001  | -3.261234985 | 6.540901269   |
| H200 | -8.192170485  | -4.754014653 | 6.118207641   |
| H201 | -6.348595894  | -3.735893008 | 7.891066290   |
| H202 | 6.926840441   | -4.057365646 | 11.075314074  |
| H203 | 3.789740781   | -4.993404114 | -3.543628236  |
| H204 | 3.862136806   | -7.761429772 | 1.414172479   |
| H205 | 7.446040549   | -3.515905117 | -7.432779874  |
| H206 | 8.163149154   | -2.111421214 | -6.601612231  |
| H207 | 5.206742185   | -2.668578961 | -7.1956016973 |
| H208 | 3.705506138   | 2.883226392  | -8.796504489  |
| H209 | 6.727405475   | -1.509604642 | -8.896719456  |
| H210 | 0.373738720   | -2.137163692 | -3.916707846  |
| H211 | -0.035035697  | -5.026208691 | -2.930580565  |
| H212 | 4.637704526   | 0.936811112  | -7.251362091  |
| H213 | 2.807235033   | 0.504182125  | -9.542280015  |
| H214 | 6.713280615   | 0.747524488  | -6.9907611345 |
| H215 | 2.941887410   | -4.692589336 | -2.043143513  |
| H216 | 5.677956363   | -1.424864055 | -6.031779798  |
| H217 | 8.016982564   | -0.112086279 | -7.499128648  |
| H218 | -1.159786588  | -4.072554342 | -6.592486329  |
| H219 | -0.861141382  | -2.564504182 | -2.721728465  |
| H220 | 8.038133117   | -1.989007118 | -4.467827217  |
| H221 | 0.872301457   | -3.859047719 | -1.972696794  |
| H222 | -5.562919183  | 0.421982315  | -0.544025283  |
| H223 | -2.904919555  | -0.515261194 | -0.747745986  |
| H224 | -7.751993602  | -2.943999180 | -3.246090766  |
| H225 | -5.119989703  | -2.359912841 | -4.531191501  |
| H226 | -7.120460608  | 1.061926222  | -3.671064476  |
| H227 | -11.195215429 | 4.295668108  | -3.752431547  |
| H228 | -9.951689158  | 0.930961850  | -2.175147636  |
| H229 | -9.456839226  | 1.285211055  | -4.885323705  |
| H230 | -8.436629782  | 3.489807850  | -2.984437633  |
| H231 | -10.814969538 | 5.043223618  | -7.906716120  |
| H232 | -4.715537027  | 2.574085062  | -1.404299440  |
| H233 | -4.927041091  | 2.055658973  | -3.077370148  |
| H234 | -12.000222286 | 5.690735659  | -5.737568928  |
| H235 | -8.061612855  | 2.297079928  | -5.256268693  |
| H236 | -5.069589394  | -0.608282767 | -3.172977755  |
| H237 | -6.204407942  | -3.554635452 | -2.656265369  |
| H238 | -6.797346822  | -0.990293872 | -7.260544495  |
| H239 | -0.224419245  | 1.559706429  | -3.277645586  |
| H240 | -6.281190081  | -2.667886235 | -7.522080931  |
| H241 | -0.475287783  | -0.266648317 | -1.571799006  |
| H242 | 2.615674522   | 5.086714539  | 9.395774489   |
| H243 | 1.883888393   | 4.794671713  | 7.962175488   |
| H244 | -0.710001521  | 6.250098445  | 0.167138322   |
| H245 | -3.202906022  | 4.912182415  | -0.534886091  |
| H246 | -2.503984451  | 8.024958370  | 0.990706434   |
| H247 | -2.698520121  | 3.044752121  | -4.178751251  |
| H248 | -2.938756852  | 2.560167337  | -6.359841980  |
| H249 | -3.804272729  | 3.989031924  | -4.858840794  |
| H250 | -5.465256540  | 4.878464464  | -6.109364953  |
| H251 | -1.265233944  | 0.935119431  | -6.698804773  |
| H252 | -2.356042765  | 0.221758583  | -7.917499787  |
| H253 | -3.852007689  | 11.550146994 | -2.029569751  |
| H254 | -5.330532695  | 12.083179013 | -2.871644631  |
| H255 | -2.737116782  | 9.685462345  | -2.875097989  |
| H256 | -3.500352195  | 8.596515561  | -4.010579770  |
| H257 | -1.315938359  | 8.752164030  | -6.857749387  |
| H258 | 0.592513747   | 4.855788953  | -5.777750545  |
| H259 | -7.489269482  | 5.984368890  | -6.026665458  |
| H260 | -6.637252413  | 6.239874128  | -1.128511909  |
| H261 | -3.627522933  | 6.419241058  | -5.587326869  |
| H262 | 1.119302299   | 5.721538539  | -1.663251186  |
| H263 | 0.784523128   | 7.900391579  | -0.555889892  |
| H264 | -0.379905286  | 4.523898278  | -3.295368511  |
| H265 | -4.094557180  | -2.084433787 | -6.988172488  |
| H266 | 1.071266849   | 11.124201383 | -0.746260689  |
| H267 | -1.375796937  | -1.528165789 | -6.337664634  |
| H268 | 1.654353823   | 6.814848478  | -2.945357005  |
| H269 | -4.899347166  | 5.339580904  | -2.633765122  |

|      |              |               |              |
|------|--------------|---------------|--------------|
| H270 | -0.475658895 | 11.026427971  | 0.122732474  |
| H271 | 0.066106950  | 7.727226085   | -6.713769202 |
| H272 | -3.404428043 | 7.735087730   | -6.677188107 |
| H273 | 0.310912769  | -3.887851659  | -5.836774655 |
| H274 | -1.821050343 | -4.225047890  | -4.355005200 |
| H275 | -9.193374908 | 6.983772740   | -4.535303306 |
| H276 | -2.869936814 | 0.465317850   | -4.899366039 |
| H277 | -0.654305518 | 7.751028198   | -3.155034357 |
| H278 | 0.835017186  | 6.526975586   | -5.250847963 |
| H279 | 1.339449653  | 4.462489582   | -3.635165422 |
| H280 | -1.831930841 | 5.110617403   | -5.110996629 |
| H281 | -5.108828814 | 8.060579889   | 2.243035070  |
| H282 | -4.405653473 | 9.156857427   | -0.815795135 |
| H283 | -5.737152428 | 11.740887682  | -0.490887730 |
| H284 | -3.762140918 | 9.200571097   | 2.468504186  |
| H285 | -6.955011961 | 8.621973130   | -1.097278832 |
| H286 | 10.144136672 | 1.851921184   | -2.857842879 |
| H287 | 10.225601345 | 0.193448468   | -2.231943821 |
| H288 | 9.955232133  | -0.798959357  | 2.770046877  |
| H289 | 12.175261854 | 0.578791732   | -3.533425603 |
| H290 | 11.215539099 | -0.359911011  | -4.472807785 |
| H291 | 1.699979316  | 6.450839355   | 3.558890462  |
| H292 | -0.144922152 | 8.786845320   | 4.380852825  |
| H293 | 2.058943435  | 9.727413574   | 0.834171927  |
| H294 | -0.005244503 | 6.657490675   | 3.033929886  |
| H295 | 1.031534307  | 9.921471728   | 4.310323514  |
| H296 | 5.582125067  | 6.653436948   | -0.673023040 |
| H297 | 2.274301692  | 8.686847521   | 2.720760895  |
| H298 | 2.613418537  | -5.813460755  | 7.400296955  |
| H299 | 5.672374829  | -5.708029948  | 7.187392602  |
| H300 | 5.949875633  | 4.635360724   | -1.960915642 |
| H301 | 1.007989220  | 0.901746469   | 5.407702648  |
| H302 | 4.976565833  | 4.289010426   | -5.355179149 |
| H303 | 3.651643491  | -1.541243350  | -3.753306857 |
| H304 | 3.644971190  | 4.052727467   | -4.223349588 |
| H305 | 1.471277793  | -3.619465512  | 6.278297109  |
| H306 | 5.478565497  | 2.801005316   | -2.774000993 |
| H307 | 2.650387159  | -3.777606840  | 4.971655319  |
| H308 | 3.584509020  | -5.793029638  | 5.910475247  |
| H309 | 4.514367462  | -3.509643473  | 6.636624059  |
| H310 | 3.329829031  | -3.499252847  | 7.954773614  |
| H311 | 1.734515845  | -0.917053557  | -8.014446335 |
| H312 | 3.873185646  | -7.977771977  | 7.962911257  |
| H313 | 5.330402013  | -10.141646138 | 6.327678658  |
| H314 | 3.360611803  | 0.632380803   | -2.574288550 |
| H315 | 4.318413251  | -10.227379484 | 9.060792993  |
| H316 | 3.732993263  | -10.939236904 | 7.706712154  |
| H317 | 3.427405880  | -1.552585082  | 5.363351708  |
| H318 | 2.066053090  | 2.443973052   | -3.613081816 |
| H319 | 2.827693909  | -1.794682564  | -6.094714317 |
| H320 | 9.622633315  | -6.272681347  | 4.986252777  |
| H321 | 10.066617800 | -3.848048157  | 2.491763073  |
| H322 | 7.336160701  | -5.419232787  | 5.084202909  |
| H323 | 10.203092542 | -6.815284900  | 3.661463926  |
| H324 | 8.051106290  | 6.698937112   | -2.455424554 |
| H325 | 6.313109654  | -2.467053232  | 4.692940807  |
| H326 | 3.919036258  | -6.087520320  | 2.807432422  |
| H327 | 7.849927847  | 1.743167682   | -2.679224951 |
| H328 | 6.139352292  | -7.046440860  | 1.984130571  |
| H329 | 9.688161046  | -2.938868946  | -2.274212152 |
| H330 | 7.262099805  | -2.478665595  | -1.659598155 |
| H331 | 6.294216445  | -10.269859484 | 7.805185590  |
| H332 | 2.581875978  | 0.450007145   | 4.806258135  |
| H333 | 7.039333675  | -2.904081806  | 6.915651580  |
| H334 | 6.136616032  | -1.057432958  | 5.328414204  |
| H335 | 6.322920189  | -4.265004561  | 8.731504408  |
| H336 | 0.352963414  | -2.084897055  | 7.121173313  |
| H337 | 9.012143928  | -8.616736825  | -0.128054546 |
| H338 | 7.945860393  | -5.257124014  | 0.275956049  |
| H339 | 8.135700506  | -5.395084296  | 2.033408756  |
| H340 | 5.924471320  | -6.602070358  | 0.267247552  |
| H341 | 5.837908812  | 0.492101679   | -3.029710308 |
| H342 | 1.241745748  | 2.209153321   | -5.977350431 |
| H343 | 0.813940660  | 0.610364330   | -7.975197559 |
| H344 | 3.419356429  | -4.487682175  | 2.168604561  |
| H345 | 7.746938729  | -4.289739162  | 6.937423259  |
| H346 | 7.646433954  | -6.432119115  | 6.220493418  |
| H347 | -0.372695744 | -0.676274757  | 6.462705361  |
| H348 | 11.189888426 | -3.109668849  | -0.196291653 |
| H349 | 8.611088879  | -2.927024386  | 2.890273323  |

|       |               |               |              |
|-------|---------------|---------------|--------------|
| H350  | 6.475008539   | -0.043883447  | -4.615343452 |
| H351  | 5.365647018   | 7.541504978   | -2.201368581 |
| H352  | 1.501160543   | 1.201130371   | 8.341737791  |
| H353  | 2.560571520   | 2.107112028   | 7.236102187  |
| H354  | 12.290485859  | -0.935303355  | 2.728412863  |
| H355  | 12.301155621  | -2.568793882  | 2.634995430  |
| H356  | 10.978075857  | -4.275660184  | 6.738669179  |
| H357  | 10.514779898  | -3.965622292  | 4.519638930  |
| H358  | 12.752488992  | -2.225185388  | 6.315336165  |
| H359  | 9.838550808   | -2.940673536  | 7.022342774  |
| H360  | 4.285566630   | 2.596760604   | 9.314125278  |
| H361  | -9.742695224  | 9.842772047   | -0.000621185 |
| H362  | 5.431574464   | -4.916651190  | 11.520122067 |
| H363  | 4.407372275   | -2.543635955  | 10.331691114 |
| H364  | -9.063437221  | 9.270603760   | -2.914820274 |
| H365  | -8.939396965  | 7.043156325   | -0.788457762 |
| H366  | -10.080402190 | 7.134415550   | -2.143195512 |
| H367  | 0.805584409   | -0.896284421  | -0.080854320 |
| H368  | 2.599951022   | -2.115054953  | 0.808945106  |
| H369  | 2.138886269   | -0.047365987  | 1.783812767  |
| Mo370 | 5.830611905   | -2.011443108  | 1.338838910  |
| N371  | -0.438532660  | -7.657360262  | -5.090359107 |
| N372  | -4.081458822  | -6.944587664  | -5.425183342 |
| N373  | -5.707955355  | -8.179918510  | -3.443088889 |
| N374  | -3.964276571  | -8.436081439  | -1.260089523 |
| N375  | -3.339039232  | -5.687138928  | -0.707928493 |
| N376  | -5.919207312  | -4.764957782  | 0.066126540  |
| N377  | -6.690309443  | -6.556160179  | 2.213997404  |
| N378  | -4.473482000  | -6.870289544  | 4.028062555  |
| N379  | -3.190367391  | -4.430023852  | 4.400931659  |
| N380  | -4.851683376  | -1.935339430  | 4.249638917  |
| N381  | -7.209846668  | -3.031974742  | 5.520724392  |
| N382  | 4.147074878   | -10.077509200 | 8.064614115  |
| N383  | 4.702428526   | -7.483375947  | 7.617118618  |
| N384  | 2.582910630   | -1.882133071  | 5.841593632  |
| N385  | 0.369029348   | -1.367665565  | 6.403354285  |
| N386  | 1.671659432   | 0.154300189   | 5.216296576  |
| N387  | 5.700869840   | -4.656620586  | 9.472784043  |
| N388  | -0.617068118  | -3.456019362  | -5.982245535 |
| N389  | 2.945002666   | -4.687094083  | -3.064790529 |
| N390  | -2.194783764  | -1.328232747  | -5.746489750 |
| N391  | -4.822234655  | -1.437782401  | -6.695764831 |
| N392  | -6.137146095  | -2.467549045  | -4.451946173 |
| N393  | -5.760054739  | -0.497159013  | -2.431421624 |
| N394  | -2.336990807  | 1.893048067   | -2.962526104 |
| N395  | -1.269862960  | 0.271083422   | -1.917724584 |
| N396  | -7.576575786  | 1.560918875   | -2.908545038 |
| N397  | -9.772422949  | 3.604862351   | -6.684283340 |
| N398  | -11.297084419 | 4.959905332   | -5.808457799 |
| N399  | 2.576072460   | 4.422874844   | 8.618476190  |
| N400  | 0.863605123   | 8.912642759   | 4.246811431  |
| N401  | 1.042813277   | 9.768464405   | 0.831778685  |
| N402  | 0.204980806   | 8.236301887   | -1.340008291 |
| N403  | -1.169921263  | 5.883358371   | -5.346448781 |
| N404  | -0.884726982  | 7.938820877   | -6.430854481 |
| N405  | -3.015853940  | 7.166402156   | -5.928264480 |
| N406  | -1.597943187  | 6.228469903   | -0.369108608 |
| N407  | -3.507811614  | 7.834938634   | 0.914102887  |
| N408  | -5.083206604  | 9.782648752   | -0.378554679 |
| N409  | -3.574313185  | 9.410755642   | -3.400938280 |
| N410  | -7.618934058  | 9.335200651   | -1.389324226 |
| N411  | 11.307797700  | 0.579410049   | -4.074370546 |
| N412  | 7.787917623   | 1.097274930   | -3.476002157 |
| N413  | 5.411244036   | 2.990325408   | -3.797776352 |
| N414  | 5.734325368   | 5.515584987   | -2.443770813 |
| N415  | 7.085606924   | 0.203931330   | -7.779807252 |
| N416  | 4.236332773   | 0.484776493   | -8.079734395 |
| N417  | 11.775653232  | -1.735767484  | 2.349129851  |
| N418  | 7.973459868   | -2.524919712  | 0.372571431  |
| N419  | 9.362175765   | -2.816555291  | -1.319494941 |
| N420  | 10.643029420  | -3.108571130  | 5.055868451  |
| N421  | -0.905271680  | 1.587235091   | 1.001699236  |
| N422  | 0.223784094   | 1.530166599   | 0.949433268  |
| O423  | -2.743388672  | -6.801112554  | -3.588256933 |
| O424  | -6.158455712  | -6.109091880  | -2.608842359 |
| O425  | -5.778490091  | -8.555429683  | 0.128790752  |
| O426  | -3.131922288  | -6.324461349  | 1.467679946  |
| O427  | -4.867511103  | -3.240438784  | 1.392671910  |
| O428  | -7.680456855  | -4.723265282  | 3.146990707  |
| O429  | -5.991977563  | -7.357513931  | 5.680015781  |

|  |                   |               |                                    |              |              |
|--|-------------------|---------------|------------------------------------|--------------|--------------|
|  | O430              | -1.769921722  | -5.329882606                       | 5.966326897  |              |
|  | O431              | -3.574170581  | -1.527442801                       | 6.097566615  |              |
|  | O432              | -7.093574285  | -1.193718490                       | 6.846740702  |              |
|  | O433              | -8.128725883  | -3.956564454                       | 8.866549617  |              |
|  | O434              | 6.857730558   | -7.923022908                       | 6.901839689  |              |
|  | O435              | 4.001975880   | -6.112012833                       | 9.993103141  |              |
|  | O436              | 5.377678551   | -2.172427851                       | 12.085521420 |              |
|  | O437              | -3.286256914  | -2.164212937                       | -3.909270713 |              |
|  | O438              | 1.827791032   | -4.605427653                       | -5.040561745 |              |
|  | O439              | -5.283839645  | 0.515000110                        | -5.609529558 |              |
|  | O440              | -2.998858427  | 2.004316549                        | -7.186100555 |              |
|  | O441              | -8.167709140  | -2.279439974                       | -5.514388593 |              |
|  | O442              | -7.390751783  | -1.486225319                       | -1.175801781 |              |
|  | O443              | -7.540225202  | 2.046403444                        | -0.678062643 |              |
|  | O444              | -10.737924409 | 2.797224490                        | -1.926138443 |              |
|  | O445              | 3.187646228   | 1.737718020                        | 10.804511805 |              |
|  | O446              | -2.806335293  | 4.270553296                        | 5.111838128  |              |
|  | O447              | -0.887131906  | 9.090343990                        | 1.838641664  |              |
|  | O448              | -0.988919865  | 10.006042414                       | -2.194004296 |              |
|  | O449              | -2.579733098  | 6.359276431                        | -2.433824591 |              |
|  | O450              | -5.051469837  | 6.148853971                        | 0.739320522  |              |
|  | O451              | -2.181852863  | 5.582319457                        | 2.585915771  |              |
|  | O452              | -5.873057647  | 10.555807921                       | 1.625232386  |              |
|  | O453              | -7.876789642  | 11.526453266                       | -1.964741244 |              |
|  | O454              | -5.703260626  | 9.795017786                        | -4.126269917 |              |
|  | O455              | -11.171113527 | 9.728204545                        | -1.456343199 |              |
|  | O456              | -5.091912311  | 5.063936534                        | -5.226021831 |              |
|  | O457              | 8.860429726   | -0.556387426                       | -4.656014766 |              |
|  | O458              | 5.604628193   | 2.000256005                        | -5.855646569 |              |
|  | O459              | 4.617319246   | 6.546473593                        | -4.155117092 |              |
|  | O460              | 7.835299972   | 8.035288660                        | -0.927613466 |              |
|  | O461              | 4.395240818   | -1.190816078                       | -9.620903337 |              |
|  | O462              | 6.653529349   | -4.629204856                       | -5.205523484 |              |
|  | O463              | 7.633893077   | -2.877358221                       | -4.22291637  |              |
|  | O464              | 1.693394239   | 2.956341364                        | -8.477157400 |              |
|  | O465              | 10.645403951  | -0.849896651                       | 5.194695028  |              |
|  | O466              | 11.987400165  | -2.010173418                       | 8.194616821  |              |
|  | O467              | 2.686758114   | -5.445450537                       | -0.133559013 |              |
|  | O468              | 3.375031355   | -7.412046005                       | 0.643659603  |              |
|  | O469              | 9.575954478   | -7.451442919                       | 1.755572215  |              |
|  | O470              | 8.388653852   | -7.859146065                       | -0.121952340 |              |
|  | O471              | 6.505866038   | -3.337508205                       | 3.071375040  |              |
|  | O472              | 6.050893012   | -5.336165907                       | 4.010594038  |              |
|  | O473              | 5.516186234   | -4.006214082                       | 0.724052576  |              |
|  | O474              | 7.459657255   | -3.550677122                       | 7.537742476  |              |
|  | O475              | 6.148795244   | -2.008776230                       | 5.556249690  |              |
|  | O476              | -2.898169622  | 3.633397404                        | -4.985292096 |              |
|  | O477              | 10.477166350  | -6.535647978                       | 4.559437926  |              |
|  | O478              | 8.030458707   | -5.633655220                       | 5.776038880  |              |
|  | S479              | 1.466519330   | 6.247134321                        | 1.146711571  |              |
|  | S480              | 2.414963754   | 3.201277929                        | -0.658726124 |              |
|  | S481              | 4.931640948   | -1.294081636                       | -0.707493845 |              |
|  | S482              | 1.787831137   | 2.955710219                        | 2.778619361  |              |
|  | S483              | 1.855597289   | -0.263930065                       | -0.682714378 |              |
|  | S484              | 6.369851111   | 2.370846892                        | -0.824313934 |              |
|  | S485              | 3.934542959   | -1.838697806                       | 2.751883799  |              |
|  | S486              | 4.764583648   | 4.350415318                        | 1.856863906  |              |
|  | S487              | 7.046693398   | -0.056940006                       | 2.004225703  |              |
|  | S488              | 4.674325019   | 1.340052552                        | 4.570917854  |              |
|  | <b>27 (S=1/2)</b> |               | <b>bm1s2b2x6n2xaconexdtl.car_3</b> |              |              |
|  | Fe(139) 2.540     | C1            | -2.963870889                       | 9.300326847  | 1.594052212  |
|  | Fe(140) -1.438    | C2            | -2.501576548                       | 8.744918785  | 0.242763485  |
|  | Fe(141) 2.380     | C3            | -3.038723670                       | 8.504683553  | -2.148618873 |
|  | Fe(142) -2.575    | C4            | -1.707412179                       | 8.939271028  | -2.756952380 |
|  | Fe(143) 2.016     | C5            | 0.046077266                        | 10.626798692 | -2.910910790 |
|  | Fe(144) -2.205    | C6            | 1.234264979                        | 9.802682934  | -2.399474389 |
|  | Fe(145) 0.322     | C7            | 2.128014388                        | 8.427430592  | -0.581522875 |
|  |                   | C8            | 2.114751900                        | 7.021239757  | -1.188276033 |
|  |                   | C9            | 0.798887181                        | 5.162366054  | -2.054810517 |
|  |                   | C10           | 1.336438633                        | 5.156934563  | -3.494190059 |
|  |                   | C11           | 1.547344316                        | 6.325252681  | -5.611529342 |
|  |                   | C12           | 3.055598922                        | 6.588334060  | -5.712101767 |
|  |                   | C13           | 4.936912734                        | 7.983707930  | -5.008543540 |
|  |                   | C14           | 5.995937298                        | 7.161934149  | -4.262771160 |
|  |                   | C15           | 6.542329979                        | 5.872787915  | -2.243028510 |
|  |                   | C16           | 6.364919596                        | 4.361752152  | -2.076556744 |
|  |                   | C17           | 4.959568958                        | 2.393589732  | -2.615848535 |
|  |                   | C18           | 5.047079552                        | 1.755285862  | -4.013636390 |
|  |                   | C19           | 3.614642480                        | 2.123708203  | -1.894542729 |



|     |              |              |               |
|-----|--------------|--------------|---------------|
| C20 | 3.235645513  | 0.640792824  | -1.959669185  |
| C21 | 3.667059669  | 2.619920307  | -0.445066060  |
| C22 | 4.137609704  | 1.646891876  | -6.297387285  |
| C23 | 5.293087576  | 2.240139658  | -7.126255734  |
| C24 | 2.757572233  | 1.835869484  | -6.968777728  |
| C25 | 2.792867067  | 1.405998405  | -8.440013285  |
| C26 | 1.671001177  | 1.060432128  | -6.213832744  |
| C27 | 6.473117685  | 4.217236661  | -7.893873967  |
| C28 | 7.847123195  | 3.642173476  | -7.615682510  |
| C29 | 10.789052354 | 4.870831738  | 6.371833871   |
| C30 | 10.218529174 | 3.456056097  | 6.243429550   |
| C31 | 9.650380834  | 1.698082778  | 4.555397139   |
| C32 | 10.877400108 | 0.889599578  | 4.092464364   |
| C33 | 8.599811487  | 1.841578364  | 3.441478971   |
| C34 | 8.055181003  | 0.509246701  | 2.919677628   |
| C35 | 6.778788609  | 0.729618087  | 2.102446565   |
| C36 | 6.084566432  | -0.930376050 | 0.366907171   |
| C37 | 12.117287653 | -1.208962267 | 4.337747952   |
| C38 | 11.764071982 | -2.401759406 | 3.475578882   |
| C39 | -3.461299783 | 4.786704592  | 0.474588112   |
| C40 | -3.933670307 | 3.967379544  | -0.732625547  |
| C41 | -2.312085492 | 4.066689231  | 1.201036346   |
| C42 | -1.404689060 | 4.987979264  | 2.050629866   |
| C43 | -1.884376645 | 5.239923367  | 3.471640349   |
| C44 | -5.729330614 | 2.512765241  | -1.607360350  |
| C45 | -5.925561272 | 3.211189221  | -2.960161079  |
| C46 | -7.055585186 | 1.938538126  | -1.053484874  |
| C47 | -6.375631365 | 5.329971323  | -4.118812303  |
| C48 | -5.072923817 | 5.593720313  | -4.886613356  |
| C49 | -2.629017890 | 5.327102314  | -4.917639179  |
| C50 | -2.086426629 | 3.974580528  | -5.396354834  |
| C51 | -2.297182673 | 1.528519625  | -5.378527650  |
| C52 | -2.732569385 | 1.358338674  | -6.845250232  |
| C53 | -3.014635290 | 0.409678345  | -4.603654976  |
| C54 | -2.591672081 | 0.152938281  | -3.191382635  |
| C55 | -1.343629626 | 0.170173688  | -2.600646824  |
| C56 | -2.849296346 | -0.555578685 | -1.153956605  |
| C57 | -4.644824014 | 1.469889073  | -8.367915832  |
| C58 | -3.723203872 | 1.811894036  | -9.536526112  |
| C59 | -5.959693678 | 2.277002879  | -8.451529136  |
| C60 | -6.980895419 | 1.781234747  | -9.433841722  |
| C61 | -6.828909143 | 1.178075986  | -10.667270699 |
| C62 | -8.977963601 | 1.403542113  | -10.177681322 |
| C63 | 7.736514677  | -6.179010393 | -0.455784316  |
| C64 | 8.683385960  | -6.211849009 | 0.729147923   |
| C65 | 6.905915147  | -4.875969363 | -0.336553577  |
| C66 | 5.903338057  | -4.711396789 | -1.453975805  |
| C67 | 6.238329222  | -4.043534016 | -2.647132518  |
| C68 | 4.593666574  | -5.208034882 | -1.320649445  |
| C69 | 5.296632551  | -3.861134496 | -3.666194324  |
| C70 | 3.649608182  | -5.048325080 | -2.334225462  |
| C71 | 4.001651217  | -4.368473902 | -3.505387540  |
| C72 | 0.035763287  | -8.779550953 | -1.852896407  |
| C73 | -1.305545562 | -8.858278865 | -2.592560906  |
| C74 | 0.310325044  | -7.333538869 | -1.412569291  |
| C75 | -3.666749412 | -9.530703043 | -2.475286820  |
| C76 | -4.459541588 | -8.223366923 | -2.552078047  |
| C77 | -4.613710189 | -5.865904905 | -1.828570332  |
| C78 | -4.007319399 | -5.005835551 | -2.958844501  |
| C79 | -4.479901099 | -5.208763233 | -0.442494069  |
| C80 | -5.008936574 | -3.777393812 | -0.296286179  |
| C81 | -6.535955259 | -3.599375148 | -0.323107812  |
| C82 | -7.929141562 | -4.123963336 | -2.337125975  |
| C83 | -2.024487548 | -4.200812890 | -4.125398580  |
| C84 | -2.036360963 | -4.835443021 | -5.531935683  |
| C85 | -0.580796238 | -3.820390991 | -3.777450135  |
| C86 | -1.739257799 | -6.904383588 | -6.805791967  |
| C87 | -2.849035840 | -7.438021324 | -7.707721887  |
| C88 | -5.262604197 | -7.717168748 | -8.082468111  |
| C89 | -5.713740756 | -6.922343749 | -9.325558455  |
| C90 | -6.453279265 | -7.980482370 | -7.134807460  |
| C91 | -7.005081632 | -6.686784113 | -6.545581947  |
| C92 | -5.715078981 | -4.760988126 | -10.480954014 |
| C93 | -5.298015330 | -5.253998944 | -11.859817621 |
| C94 | -5.160501701 | -3.330546510 | -10.246220510 |
| C95 | -5.650215760 | -2.749674849 | -8.940585349  |
| C96 | -6.909665122 | -2.134792633 | -8.862044451  |
| C97 | -4.894494137 | -2.867581019 | -7.762279325  |
| C98 | -7.412674612 | -1.666513472 | -7.647488512  |
| C99 | -5.391743851 | -2.426099439 | -6.533910294  |

|       |              |              |              |
|-------|--------------|--------------|--------------|
| C100  | -6.653955049 | -1.833637442 | -6.486395492 |
| C101  | -2.100266616 | -3.304107137 | 9.979293276  |
| C102  | -2.729622999 | -2.300219610 | 9.026379711  |
| C103  | -3.081447820 | -1.683666945 | 6.650991520  |
| C104  | -4.211666666 | -2.342431462 | 5.853871153  |
| C105  | -4.731279187 | -4.014587648 | 4.131367583  |
| C106  | -4.572011760 | -5.530464285 | 4.061463765  |
| C107  | -3.141741943 | -7.486183049 | 4.403844797  |
| C108  | -3.194184524 | -8.299064349 | 5.678603751  |
| C109  | -6.663679018 | 0.975908783  | 7.897561360  |
| C110  | -7.483646197 | 1.236549671  | 6.625804306  |
| C111  | -5.273427249 | 1.649628894  | 7.779218497  |
| C112  | -4.627864014 | 1.817843068  | 9.167425517  |
| C113  | -3.157755876 | 2.175582209  | 9.076887281  |
| C114  | -8.070154650 | 0.511613915  | 4.357103978  |
| C115  | -8.608827251 | -0.820894390 | 3.869067195  |
| C116  | -7.269518721 | 1.309415844  | 3.297221448  |
| C117  | -5.812036690 | 0.922600729  | 3.213722726  |
| C118  | -5.396149655 | -0.229631792 | 2.524266087  |
| C119  | -4.838574644 | 1.692769011  | 3.873079815  |
| C120  | -4.049685068 | -0.604981859 | 2.512364474  |
| C121  | -3.490692936 | 1.318966135  | 3.861650422  |
| C122  | -3.090938206 | 0.164317858  | 3.181383173  |
| C123  | 4.414702397  | -2.613438455 | 9.902288164  |
| C124  | 5.862601506  | -3.066594701 | 9.653239775  |
| C125  | 4.123503739  | -1.256877195 | 9.240484495  |
| C126  | 2.692322252  | -0.814593724 | 9.251804058  |
| C127  | 1.906968833  | -0.530381958 | 10.351543302 |
| C128  | 0.802694523  | -0.016625071 | 8.503052253  |
| C129  | 8.237623122  | -2.535998245 | 9.650252761  |
| C130  | 8.626334984  | -3.754276608 | 10.457531766 |
| C131  | 3.128730276  | 4.357579714  | 4.777463540  |
| C132  | 3.947467045  | 3.100219779  | 4.863251662  |
| C133  | 3.710238268  | 2.271187201  | 6.191076126  |
| C134  | 3.808460030  | 3.219636115  | 7.421046188  |
| C135  | 3.781178394  | 2.448628576  | 8.751083677  |
| C136  | 4.141880462  | 3.277386935  | 9.950767248  |
| C137  | 4.907622967  | 1.278496682  | 6.297465435  |
| C138  | 1.130774368  | -2.656698870 | 3.197491075  |
| Fe139 | 0.883548622  | -2.650706854 | 5.200914756  |
| Fe140 | -0.008730014 | -2.463140956 | 1.555471266  |
| Fe141 | 2.108354231  | -3.968512788 | 2.077305097  |
| Fe142 | -0.083975989 | -4.232389221 | 3.480005942  |
| Fe143 | -0.192426823 | -5.141964830 | 1.041128776  |
| Fe144 | 3.001096193  | -2.320516378 | 3.796331795  |
| Fe145 | 1.129517949  | -0.530883326 | 3.295915623  |
| H146  | -1.329265752 | 8.669116773  | 2.635322765  |
| H147  | -2.677673290 | 7.783708701  | 2.947318220  |
| H148  | -4.211112812 | 9.464931459  | -0.644254447 |
| H149  | -4.057797925 | 9.198642597  | 1.671434809  |
| H150  | -2.767059243 | 10.388266181 | 1.554934311  |
| H151  | -3.031564715 | 7.405699111  | -2.144583679 |
| H152  | -1.783867678 | 10.745027643 | -1.779470669 |
| H153  | -3.846712488 | 8.832702483  | -2.816285149 |
| H154  | 0.181297773  | 11.672995383 | -2.604348129 |
| H155  | 0.216690763  | 9.368355960  | -0.665480959 |
| H156  | 0.077214085  | 10.582043194 | -4.007522116 |
| H157  | 1.375912933  | 4.411409336  | -1.499646029 |
| H158  | 0.051110774  | 6.946423761  | -1.100702296 |
| H159  | 1.969095072  | 8.358299899  | 0.503482305  |
| H160  | 1.344809733  | 5.384504875  | -6.137442132 |
| H161  | 0.446432795  | 6.986792512  | -3.883057949 |
| H162  | 3.128595259  | 8.840822279  | -0.759344365 |
| H163  | -0.255481177 | 4.849908421  | -2.055427310 |
| H164  | 2.932055711  | 8.081722099  | -4.280041260 |
| H165  | 1.013959047  | 7.135586056  | -6.126507707 |
| H166  | 3.889208927  | 3.696251455  | -0.394739834 |
| H167  | 2.700052134  | 2.446920683  | 0.050456574  |
| H168  | 4.433210462  | 2.082190057  | 0.135848288  |
| H169  | 2.837339436  | 2.699121425  | -2.422745415 |
| H170  | 5.002380419  | 9.015958320  | -4.635682305 |
| H171  | 1.574826013  | 1.388503141  | -5.168981371 |
| H172  | 4.752403071  | 4.198165919  | -6.642913825 |
| H173  | 3.510020105  | 1.995148778  | -9.029998991 |
| H174  | 2.281335569  | 0.476877544  | -1.440645832 |
| H175  | 3.986065182  | 0.009491618  | -1.461739154 |
| H176  | 8.353854870  | -6.108954776 | -1.371861441 |
| H177  | 0.699401361  | 1.208460371  | -6.705797991 |
| H178  | 1.797340252  | 1.535666562  | -8.889636981 |
| H179  | 1.894399996  | -0.019249324 | -6.217691432 |

|      |               |              |               |
|------|---------------|--------------|---------------|
| H180 | 3.071706552   | 0.344025261  | -8.531394300  |
| H181 | 2.506866227   | 2.911700784  | -6.932945211  |
| H182 | 4.361185007   | 0.570820765  | -6.240975971  |
| H183 | 3.405041944   | 2.842213384  | -4.662232958  |
| H184 | 3.122824229   | 0.284993532  | -2.994666558  |
| H185 | -0.544776651  | -3.461278602 | -2.732836147  |
| H186 | -0.287613830  | -2.994063592 | -4.444987546  |
| H187 | 1.184179980   | -4.623346206 | -4.097121616  |
| H188 | 3.368521348   | -3.682203194 | -5.208015410  |
| H189 | 2.630600667   | -5.414855801 | -2.204249513  |
| H190 | 4.290410084   | -5.690161904 | -0.387886095  |
| H191 | 7.247940699   | -3.644719236 | -2.780522568  |
| H192 | 4.640561320   | 4.442746310  | -3.166002371  |
| H193 | 6.514742264   | 6.314471877  | -1.235220060  |
| H194 | 7.548551296   | 6.036549548  | -2.651812579  |
| H195 | 4.661197094   | 6.738891987  | -2.731723136  |
| H196 | 5.234746781   | 7.982149850  | -6.065240554  |
| H197 | 5.567523521   | -3.321740765 | -4.577245644  |
| H198 | 5.772022172   | 1.932796598  | -2.038865365  |
| H199 | 6.273485339   | 4.151246351  | -8.975794181  |
| H200 | 6.502989724   | 5.283899932  | -7.620877450  |
| H201 | 7.978641616   | 3.194049698  | -6.603500170  |
| H202 | 12.596927961  | -1.557741074 | 5.264394141   |
| H203 | -1.317147582  | 5.057258629  | 5.423559921   |
| H204 | 4.720200660   | 5.333449188  | 5.253944525   |
| H205 | -5.137465605  | 2.629294628  | 9.706326248   |
| H206 | -4.745715459  | 0.890173620  | 9.746455641   |
| H207 | -5.376100144  | 2.639866444  | 7.308285527   |
| H208 | -8.911750123  | -1.516228777 | 4.688764451   |
| H209 | -7.224838275  | 1.521770485  | 8.671881897   |
| H210 | -2.727020389  | 3.251663224  | 1.814806777   |
| H211 | -1.326669744  | 5.974269595  | 1.560703426   |
| H212 | -6.703764914  | -0.449152169 | 5.706145209   |
| H213 | -8.974980902  | 1.101190982  | 4.604939726   |
| H214 | -6.055301837  | -0.995112814 | 7.671564701   |
| H215 | -0.128122711  | 4.465547653  | 4.287220062   |
| H216 | -4.637824661  | 1.043390067  | 7.115573005   |
| H217 | -6.302638978  | -0.538967385 | 9.227725261   |
| H218 | -5.123113931  | 5.869454863  | 1.017412011   |
| H219 | -1.676821019  | 3.592815706  | 0.437955883   |
| H220 | -2.764581418  | 0.255466669  | 9.197270810   |
| H221 | -0.395607932  | 4.558510882  | 2.073848371   |
| H222 | -1.207619047  | 1.390958217  | -5.360211171  |
| H223 | -0.363990101  | 0.449810824  | -2.972239915  |
| H224 | -2.725156396  | 5.954901604  | -5.812136598  |
| H225 | -3.938285374  | 4.887395376  | -3.301336106  |
| H226 | -4.512603898  | 2.284293345  | -6.388509886  |
| H227 | -5.950924088  | 0.884700438  | -11.230809537 |
| H228 | -3.120631858  | 2.738110733  | -9.376036103  |
| H229 | -5.710341501  | 3.338077969  | -8.633062514  |
| H230 | -4.860427313  | 0.388122685  | -8.393815754  |
| H231 | -10.056767667 | 1.340134339  | -10.292831804 |
| H232 | -2.877486285  | -0.513673923 | -5.192062735  |
| H233 | -4.094669121  | 0.623072049  | -4.601736272  |
| H234 | -8.356004042  | 0.497639270  | -12.001849757 |
| H235 | -6.434780574  | 2.242073483  | -7.457919801  |
| H236 | -3.347761186  | 2.922015864  | -4.132908553  |
| H237 | -1.873830209  | 5.799234354  | -4.273193552  |
| H238 | -7.052159786  | 4.838514691  | -4.832189338  |
| H239 | -3.259604327  | -0.915671895 | -0.216837201  |
| H240 | -6.820720066  | 6.297983583  | -3.852964298  |
| H241 | -0.813760756  | -0.456933424 | -0.598608311  |
| H242 | 7.401008321   | -8.184739364 | -0.698475197  |
| H243 | 6.104067109   | -7.257341777 | -1.064141455  |
| H244 | -2.069190226  | -5.470426342 | -2.366830470  |
| H245 | -2.606675285  | -3.272333521 | -4.211823147  |
| H246 | -2.023823989  | -6.725026748 | -4.723907166  |
| H247 | -5.213950847  | -0.697843872 | -2.651326915  |
| H248 | -7.180582895  | 0.409327104  | -2.282609215  |
| H249 | -6.286877716  | -0.965452660 | -3.818584600  |
| H250 | -7.942886692  | -0.894833756 | -5.371237078  |
| H251 | -6.802409754  | 1.363844430  | -0.142455612  |
| H252 | -7.710573490  | 2.772559074  | -0.753639260  |
| H253 | -6.122701525  | -8.675749388 | -6.349881681  |
| H254 | -7.245322148  | -8.462429502 | -7.722380254  |
| H255 | -6.092105349  | -7.053701639 | -4.680372797  |
| H256 | -6.831227830  | -5.486825097 | -4.894058583  |
| H257 | -9.169943469  | -5.756224471 | -2.323647461  |
| H258 | -6.821378863  | -2.730260152 | 0.288668668   |
| H259 | -8.390162264  | -1.178420610 | -7.605252368  |

|      |              |               |              |
|------|--------------|---------------|--------------|
| H260 | -3.892903590 | -3.306289834  | -7.782374308 |
| H261 | -7.737329174 | -3.063665913  | -4.090974863 |
| H262 | -3.415841308 | -5.197438019  | -0.157885477 |
| H263 | -3.129003624 | -7.297556020  | -1.274096377 |
| H264 | -4.548750632 | -3.113516379  | -1.045552935 |
| H265 | -6.326020532 | 4.981405886   | -2.004072055 |
| H266 | -4.251165449 | -10.245580134 | -1.879735829 |
| H267 | -5.573316465 | 3.521816041   | 0.331373297  |
| H268 | -4.987042765 | -5.859698836  | 0.289161195  |
| H269 | -4.821673571 | -2.578237146  | -5.616520707 |
| H270 | -3.605877543 | -9.915450391  | -3.502245472 |
| H271 | -8.590001009 | -5.281679419  | -0.764541280 |
| H272 | -9.064150854 | -4.158899276  | -4.030097990 |
| H273 | -4.208571234 | 5.356268388   | 2.291925275  |
| H274 | -3.024940019 | 5.697730284   | 0.017802387  |
| H275 | -7.509907319 | -2.013535426  | -9.766367136 |
| H276 | -5.034871249 | 1.683202004   | -1.814558049 |
| H277 | -5.670118732 | -5.991234670  | -2.100690957 |
| H278 | -7.021023353 | -4.472272643  | 0.132679068  |
| H279 | -4.652341545 | -3.416585769  | 0.680659708  |
| H280 | -6.704881393 | -2.515127756  | -2.153111955 |
| H281 | -1.118247901 | -6.243869091  | -7.429379952 |
| H282 | -4.291411571 | -6.650207757  | -6.477815063 |
| H283 | -4.923699528 | -8.685116098  | -8.480370253 |
| H284 | -1.126966506 | -7.771055677  | -6.519798212 |
| H285 | -4.673184037 | -5.288377538  | -8.682205406 |
| H286 | -2.091469813 | -4.303066993  | 9.519460136  |
| H287 | -1.039893674 | -2.992177948  | 10.088460682 |
| H288 | 3.785771308  | -3.380944471  | 9.428486225  |
| H289 | -2.266272157 | -3.791015748  | 11.952417011 |
| H290 | -2.983568370 | -2.372979097  | 11.552452985 |
| H291 | 1.238119542  | -7.322101033  | -0.826029069 |
| H292 | 1.135924903  | -8.730767267  | -3.568164404 |
| H293 | -2.182555158 | -9.718939173  | -0.945581047 |
| H294 | 0.433767783  | -6.693977588  | -2.298732271 |
| H295 | 1.004401826  | -10.230311609 | -2.930125613 |
| H296 | -2.155230980 | -7.609011167  | 3.928338795  |
| H297 | -0.011469313 | -9.419724561  | -0.957121348 |
| H298 | 9.037032814  | 2.424315205   | 2.613410746  |
| H299 | 9.189173980  | 1.216259718   | 5.426189213  |
| H300 | -2.690803363 | -5.480617483  | 4.935439395  |
| H301 | 5.364907045  | -2.429085106  | -0.809180978 |
| H302 | -5.747348529 | -3.799976332  | 4.484121368  |
| H303 | -2.749948688 | 1.931566459   | 4.382897896  |
| H304 | -4.651704977 | -3.658345353  | 3.091970600  |
| H305 | 6.961399268  | 1.387264560   | 1.240582272  |
| H306 | -2.790244550 | -3.384077116  | 4.814730476  |
| H307 | 6.024856929  | 1.234412081   | 2.726335797  |
| H308 | 7.774385152  | 2.439404000   | 3.861063448  |
| H309 | 7.808395381  | -0.162979435  | 3.756034097  |
| H310 | 8.808841077  | -0.002630833  | 2.298791291  |
| H311 | -7.351425400 | 2.375130618   | 3.551806992  |
| H312 | 10.488890561 | 3.662640493   | 4.276497592  |
| H313 | 9.946870818  | 5.507541435   | 6.684385183  |
| H314 | -2.044104278 | -0.146954573  | 3.170358405  |
| H315 | 12.356612362 | 5.197984424   | 5.075595607  |
| H316 | 11.250704565 | 6.407623748   | 5.081635907  |
| H317 | 5.566883576  | -1.008860886  | 2.310951173  |
| H318 | -3.725254067 | -1.515308369  | 2.001219967  |
| H319 | -5.143183454 | 2.602149104   | 4.398236743  |
| H320 | 7.744080165  | 1.050136005   | 9.786661496  |
| H321 | 4.726323760  | -0.481666818  | 9.746262580  |
| H322 | 7.301594458  | 1.040358912   | 7.390455861  |
| H323 | 6.742178970  | 1.704806772   | 10.763130187 |
| H324 | -3.712338811 | -7.805134857  | 6.537626952  |
| H325 | 5.831904841  | -1.107561961  | 5.590781340  |
| H326 | 5.020223995  | 3.325031376   | 4.775667218  |
| H327 | -2.014333522 | -3.346988834  | 7.396658087  |
| H328 | 4.748354054  | 3.787397297   | 7.347775520  |
| H329 | -0.071807918 | 0.305557524   | 10.396106546 |
| H330 | 0.003869801  | 0.342345842   | 7.865112641  |
| H331 | 11.494517603 | 4.847471240   | 7.219678091  |
| H332 | 4.760525649  | -2.434011478  | 0.821495739  |
| H333 | 8.149139627  | -1.613462557  | 5.951564419  |
| H334 | 5.941439291  | -2.475193559  | 4.866471140  |
| H335 | 10.249729497 | -0.700921086  | 5.284042601  |
| H336 | 7.627103328  | 0.223372463   | -0.373574238 |
| H337 | 3.607535788  | 4.798083816   | 10.942338010 |
| H338 | 2.774270655  | 2.032287336   | 8.899712482  |
| H339 | 4.490274389  | 1.613977124   | 8.728409025  |

|       |              |              |               |
|-------|--------------|--------------|---------------|
| H340  | 2.969422270  | 3.929685553  | 7.387507130   |
| H341  | -2.237810419 | -1.427293409 | 5.991824270   |
| H342  | -6.140848650 | -0.841441978 | 2.007755624   |
| H343  | -7.773621421 | 1.153889471  | 2.331109140   |
| H344  | 3.649072057  | 2.436569019  | 4.040067018   |
| H345  | 8.711215882  | -0.644938986 | 7.028510742   |
| H346  | 8.756079206  | 1.499132228  | 7.715348507   |
| H347  | 6.746052425  | -0.667445897 | -1.561585709  |
| H348  | 2.100758971  | -0.636610747 | 11.412014994  |
| H349  | 4.466192634  | -1.285744043 | 8.199479092   |
| H350  | -3.471972299 | -0.770171776 | 7.105722510   |
| H351  | -3.899098310 | -7.904926201 | 3.719738162   |
| H352  | 7.612335988  | -4.032337839 | -0.334251417  |
| H353  | 6.381865731  | -4.875582652 | 0.633127265   |
| H354  | 4.233176011  | -3.543196896 | 11.722522808  |
| H355  | 4.752910350  | -1.996877869 | 11.839405373  |
| H356  | 8.869389628  | -1.701661826 | 9.993897563   |
| H357  | 6.658325643  | -1.183667053 | 10.110388911  |
| H358  | 8.015713095  | -3.924469805 | 11.377363387  |
| H359  | 8.467375071  | -2.704492562 | 8.586144036   |
| H360  | 8.213104238  | -6.555913012 | 1.681201865   |
| H361  | -4.388948885 | -5.899823456 | -11.876984506 |
| H362  | 12.852865229 | -0.607225268 | 3.777072086   |
| H363  | 10.871179054 | -2.262354786 | 2.818396295   |
| H364  | -6.816562802 | -4.725467657 | -10.462688839 |
| H365  | -4.060275120 | -3.361908163 | -10.267036037 |
| H366  | -5.490512803 | -2.710883000 | -11.092666405 |
| H367  | 2.363067014  | -1.094169414 | 0.725411130   |
| H368  | -1.183250463 | -1.536433034 | 1.133190273   |
| Mo369 | 2.484465711  | -0.457690003 | 5.713418750   |
| N370  | -2.340344005 | 8.737396260  | 2.776473084   |
| N371  | -3.305188051 | 9.036426863  | -0.819104135  |
| N372  | -1.241638089 | 10.165820004 | -2.415860838  |
| N373  | 1.119627982  | 9.315446864  | -1.138068988  |
| N374  | 0.896659646  | 6.464330980  | -1.409139390  |
| N375  | 1.056434920  | 6.249807873  | -4.245320009  |
| N376  | 3.556213757  | 7.544369562  | -4.887010612  |
| N377  | 5.594348027  | 6.550653342  | -3.112202409  |
| N378  | 5.281268729  | 3.814942565  | -2.684246364  |
| N379  | 4.134611426  | 2.179195841  | -4.933027364  |
| N380  | 5.438695288  | 3.589723428  | -7.094328040  |
| N381  | 11.354396686 | 5.392756396  | 5.122729001   |
| N382  | 10.100724226 | 3.019307042  | 4.975085994   |
| N383  | 6.166384603  | -0.518069390 | 1.637843455   |
| N384  | 6.818872373  | -0.344114619 | -0.602323438  |
| N385  | 5.207168179  | -1.895294923 | 0.044081965   |
| N386  | 10.981256452 | -0.353354783 | 4.625818763   |
| N387  | -4.586425804 | 5.073867540  | 1.374648630   |
| N388  | -1.040661338 | 4.888693487  | 4.458659427   |
| N389  | -5.147738527 | 3.388466917  | -0.595281405  |
| N390  | -6.251470221 | 4.531937801  | -2.913028583  |
| N391  | -3.912293420 | 5.299019919  | -4.240308099  |
| N392  | -2.642689453 | 2.850104204  | -4.864688687  |
| N393  | -3.527151662 | -0.301757072 | -2.273363862  |
| N394  | -1.533354468 | -0.279598946 | -1.312341558  |
| N395  | -3.973803230 | 1.833255446  | -7.126847763  |
| N396  | -8.328392692 | 1.918207420  | -9.140941382  |
| N397  | -8.109502588 | 0.942648262  | -11.122099799 |
| N398  | 6.873859559  | -7.361392814 | -0.397058239  |
| N399  | 1.156518096  | -9.247806802 | -2.682658263  |
| N400  | -2.334603555 | -9.435447395 | -1.910434326  |
| N401  | -4.024315480 | -7.203388275 | -1.782350153  |
| N402  | -7.068264359 | -3.365221563 | -1.669731979  |
| N403  | -8.538220530 | -5.185914724 | -1.772102758  |
| N404  | -8.159474245 | -3.886445049 | -3.653927663  |
| N405  | -2.651801547 | -5.021259510 | -3.091999138  |
| N406  | -2.128903183 | -6.195792945 | -5.595370988  |
| N407  | -4.135044512 | -7.123845425 | -7.368661774  |
| N408  | -6.557304955 | -6.380914403 | -5.301063680  |
| N409  | -5.232210206 | -5.661492643 | -9.445862322  |
| N410  | -2.846049586 | -3.339692486 | 11.241288179  |
| N411  | -2.599057616 | -2.560019126 | 7.711971499   |
| N412  | -3.804089889 | -3.283703770 | 4.973390176   |
| N413  | -3.451384085 | -6.082465659 | 4.598651171   |
| N414  | -6.671879948 | -0.440565687 | 8.279259057   |
| N415  | -7.378957279 | 0.317551474  | 5.624610169   |
| N416  | 4.092087703  | -2.602630431 | 11.342407694  |
| N417  | 1.980533443  | -0.488521730 | 8.098014172   |
| N418  | 0.720821687  | -0.032887749 | 9.855987991   |
| N419  | 6.853177647  | -2.155042868 | 9.868207970   |

|      |              |              |               |
|------|--------------|--------------|---------------|
| N420 | 0.042438035  | 2.190034113  | 3.012615179   |
| N421 | 0.473964261  | 1.151753133  | 3.132806348   |
| O422 | -1.430633012 | 8.124147723  | 0.097229791   |
| O423 | -1.100153087 | 8.192519013  | -3.541792889  |
| O424 | 2.243275315  | 9.636405817  | -3.104457741  |
| O425 | 3.170079409  | 6.431081742  | -1.471226074  |
| O426 | 1.984496241  | 4.195669293  | -3.938626452  |
| O427 | 3.759860205  | 5.982220268  | -6.538531855  |
| O428 | 7.156064434  | 7.123364579  | -4.695816272  |
| O429 | 7.188099994  | 3.724507535  | -1.401687609  |
| O430 | 5.909237618  | 0.902195569  | -4.274309314  |
| O431 | 6.056633947  | 1.519352922  | -7.789924044  |
| O432 | 8.775976708  | 3.718197407  | -8.406477080  |
| O433 | 9.886590998  | 2.830254960  | 7.272771043   |
| O434 | 11.697911045 | 1.380683231  | 3.297769555   |
| O435 | 12.403730842 | -3.441847762 | 3.467226622   |
| O436 | -3.254510233 | 3.890141707  | -1.779102598  |
| O437 | -2.993034272 | 5.777862573  | 3.714312854   |
| O438 | -5.779772332 | 2.600243333  | -4.030287281  |
| O439 | -7.767472578 | 1.161670698  | -1.992617595  |
| O440 | -5.130716903 | 6.064536194  | -6.031722436  |
| O441 | -1.186159750 | 3.939078513  | -6.245020408  |
| O442 | -2.050782161 | 0.744000679  | -7.676480092  |
| O443 | -3.683381400 | 1.193885371  | -10.588538784 |
| O444 | 9.859356848  | -5.880001184 | 0.681507431   |
| O445 | 3.024001654  | -4.214304333 | -4.467345258  |
| O446 | -1.451126106 | -8.427225320 | -3.751899617  |
| O447 | -5.469146056 | -8.171818177 | -3.284835754  |
| O448 | -4.746183686 | -4.345348912 | -3.705982566  |
| O449 | -1.923245069 | -4.114719267 | -6.533070241  |
| O450 | 0.271617644  | -4.953074604 | -3.965579859  |
| O451 | -2.563275502 | -8.112632318 | -8.705022035  |
| O452 | -6.466060629 | -7.437212184 | -10.165125347 |
| O453 | -7.746877251 | -5.937363937 | -7.200680840  |
| O454 | -5.883378486 | -4.938897682 | -12.884142339 |
| O455 | -7.142269230 | -1.437643008 | -5.237171483  |
| O456 | -3.302645344 | -1.276101723 | 9.478914761   |
| O457 | -5.409954380 | -2.036540844 | 6.030641601   |
| O458 | -5.451535582 | -6.193232819 | 3.487293933   |
| O459 | -2.725399687 | -9.422341671 | 5.776070833   |
| O460 | -8.194324712 | 2.250202804  | 6.518818902   |
| O461 | -2.739842409 | 3.321622751  | 8.970782749   |
| O462 | -2.288032789 | 1.137567830  | 9.091982134   |
| O463 | -8.752534437 | -1.128074088 | 2.694297146   |
| O464 | 6.137167058  | -4.237633689 | 9.334014811   |
| O465 | 9.576387958  | -4.472556711 | 10.182081558  |
| O466 | 1.943023822  | 4.420265649  | 4.492379239   |
| O467 | 3.783820917  | 5.531068356  | 5.060970446   |
| O468 | 5.082384123  | 3.063407949  | 10.713041700  |
| O469 | 3.296994296  | 4.325076157  | 10.140968701  |
| O470 | 4.592733780  | 0.024842732  | 6.319383643   |
| O471 | 6.077973134  | 1.715511625  | 6.400786176   |
| O472 | 2.501544462  | 1.603757623  | 6.155144029   |
| O473 | 8.994705248  | -1.362445268 | 6.402424681   |
| O474 | 6.480050862  | -1.707800431 | 5.141130120   |
| O475 | -6.188871713 | -0.909934076 | -2.843543172  |
| O476 | 7.515459296  | 1.103760156  | 10.749388001  |
| O477 | 8.096268236  | 0.795318125  | 7.946972665   |
| S478 | -1.048280413 | -6.629978916 | -0.367506655  |
| S479 | -1.759153864 | -3.865545731 | 2.009806752   |
| S480 | 0.143695591  | -0.545269180 | 5.369831690   |
| S481 | 1.139515095  | -3.676156633 | 0.063050027   |
| S482 | 1.120975580  | -0.596468999 | 0.994378398   |
| S483 | -0.580977444 | -4.265597428 | 5.657776469   |
| S484 | 3.295572313  | -0.123775388 | 3.501852783   |
| S485 | 1.135303371  | -5.931477801 | 2.656139087   |
| S486 | 2.988017192  | -2.778518088 | 5.993195092   |
| S487 | 4.253754129  | -3.666168842 | 2.569593089   |
